# Supplementary material for: Low Salt Influences Archaellum-Based Motility, Glycerol Metabolism, and Gas Vesicles Biogenesis in Halobacterium salinarum
Source: MDPI journal article supplement (doi:10.3390/microorganisms10122442), 2022-12-10
Supplement: s1 [file s1]

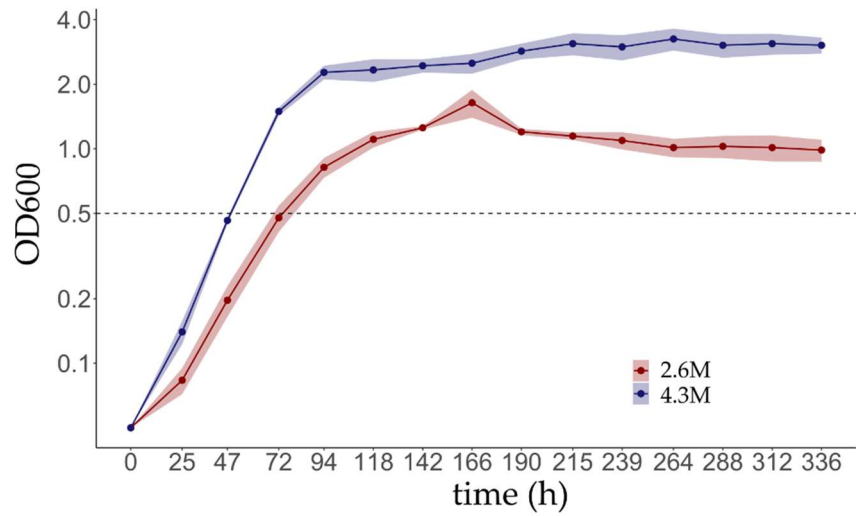

**Figure S1.** Growth curve of *H. salinarum* under the conditions of optimum salt (4.3 M of NaCl) and low salt (2.6 M of NaCl).

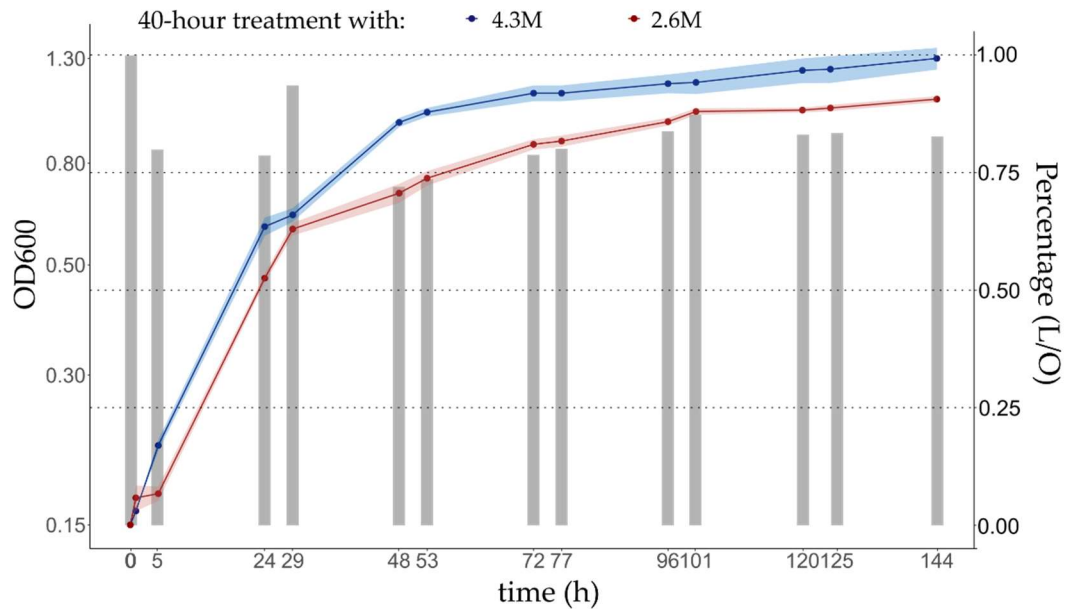

**Figure S2.** *H. salinarum* pre-inoculum after a 40-hour treatment with optimal or low salt medium. The right Y-axis represents the relative percentage of cells recovered from the low salt treatment.

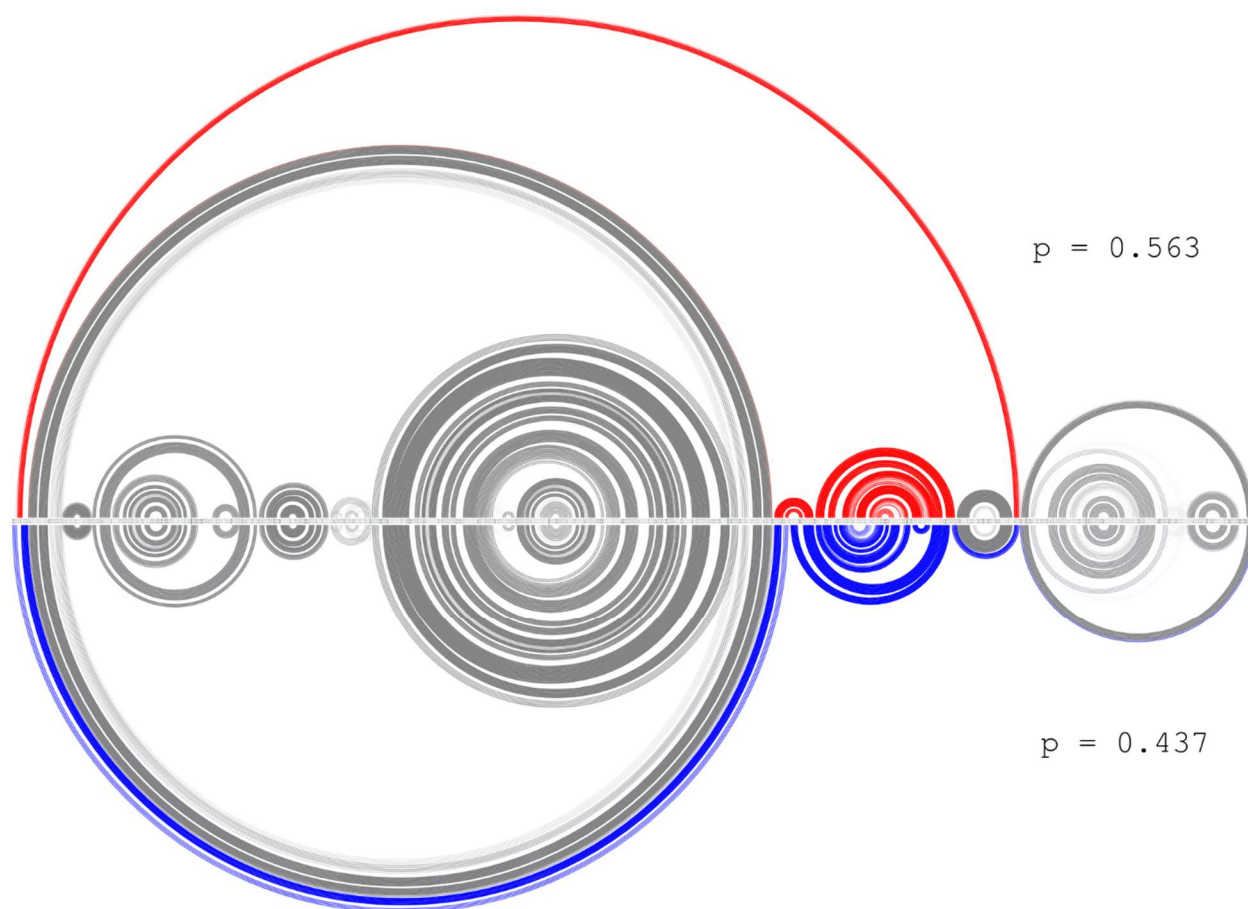

**Figure S3.** Predicted rainbow diagram of *rpl15e* representing the two thermodynamically stable predictions.

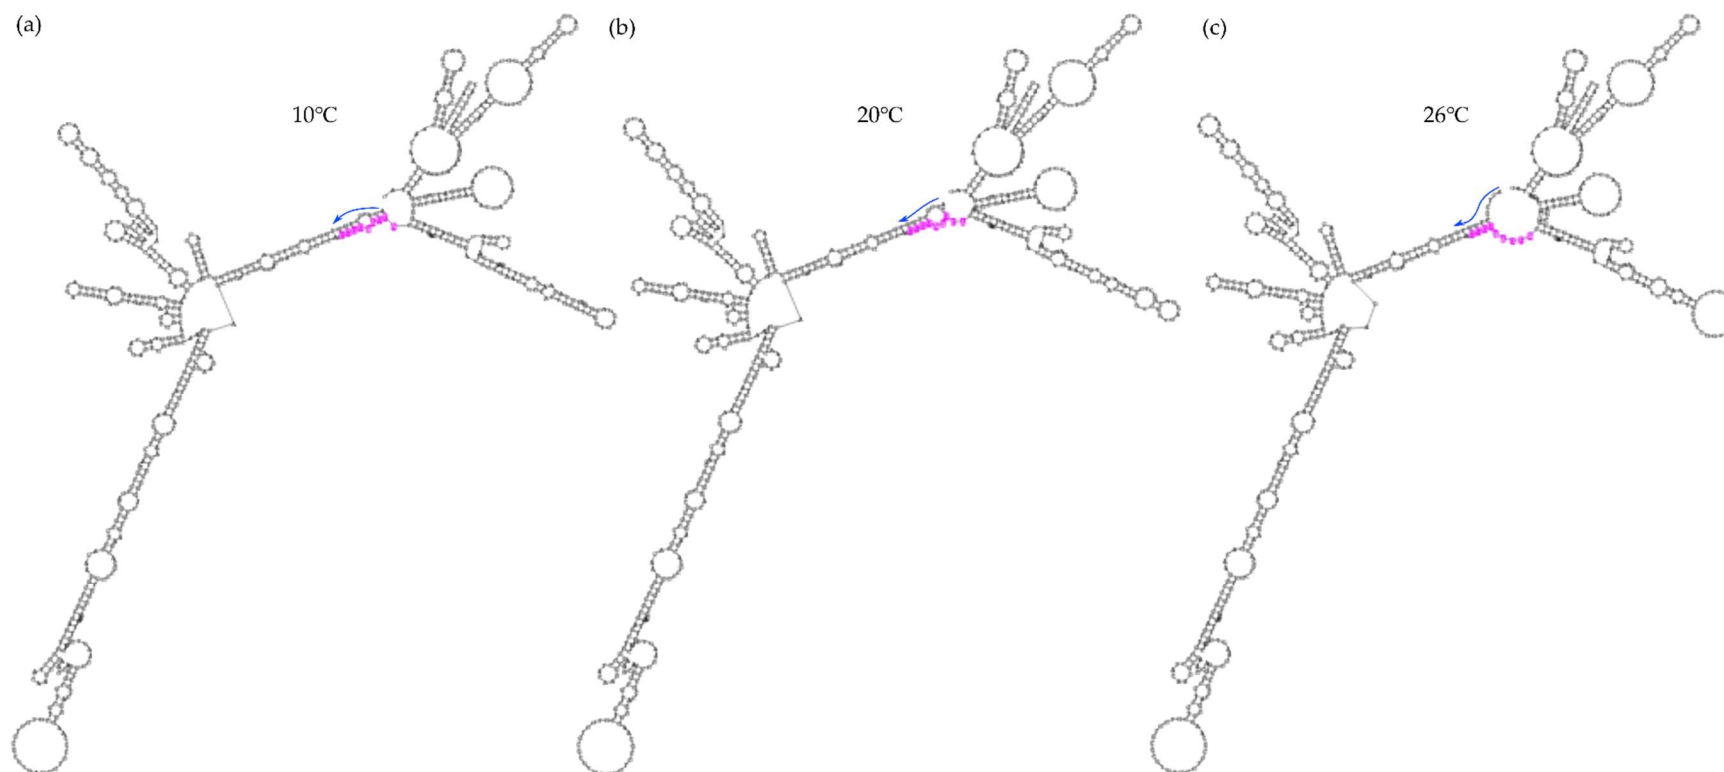

**Figure S4. Emulation of different ionic environments predicting secondary structures of *rpl15e* by a temperature gradient.** Blue arrow represents the beginning of the transcript and magenta nucleotides represent TPS upstream sequence. (a) Structure at 10°C (b) 20°C (c) 26°C (d) 28°C (e) 30°C (f) 36°C (g) 46°C (h) 60°C (i) 77°C.

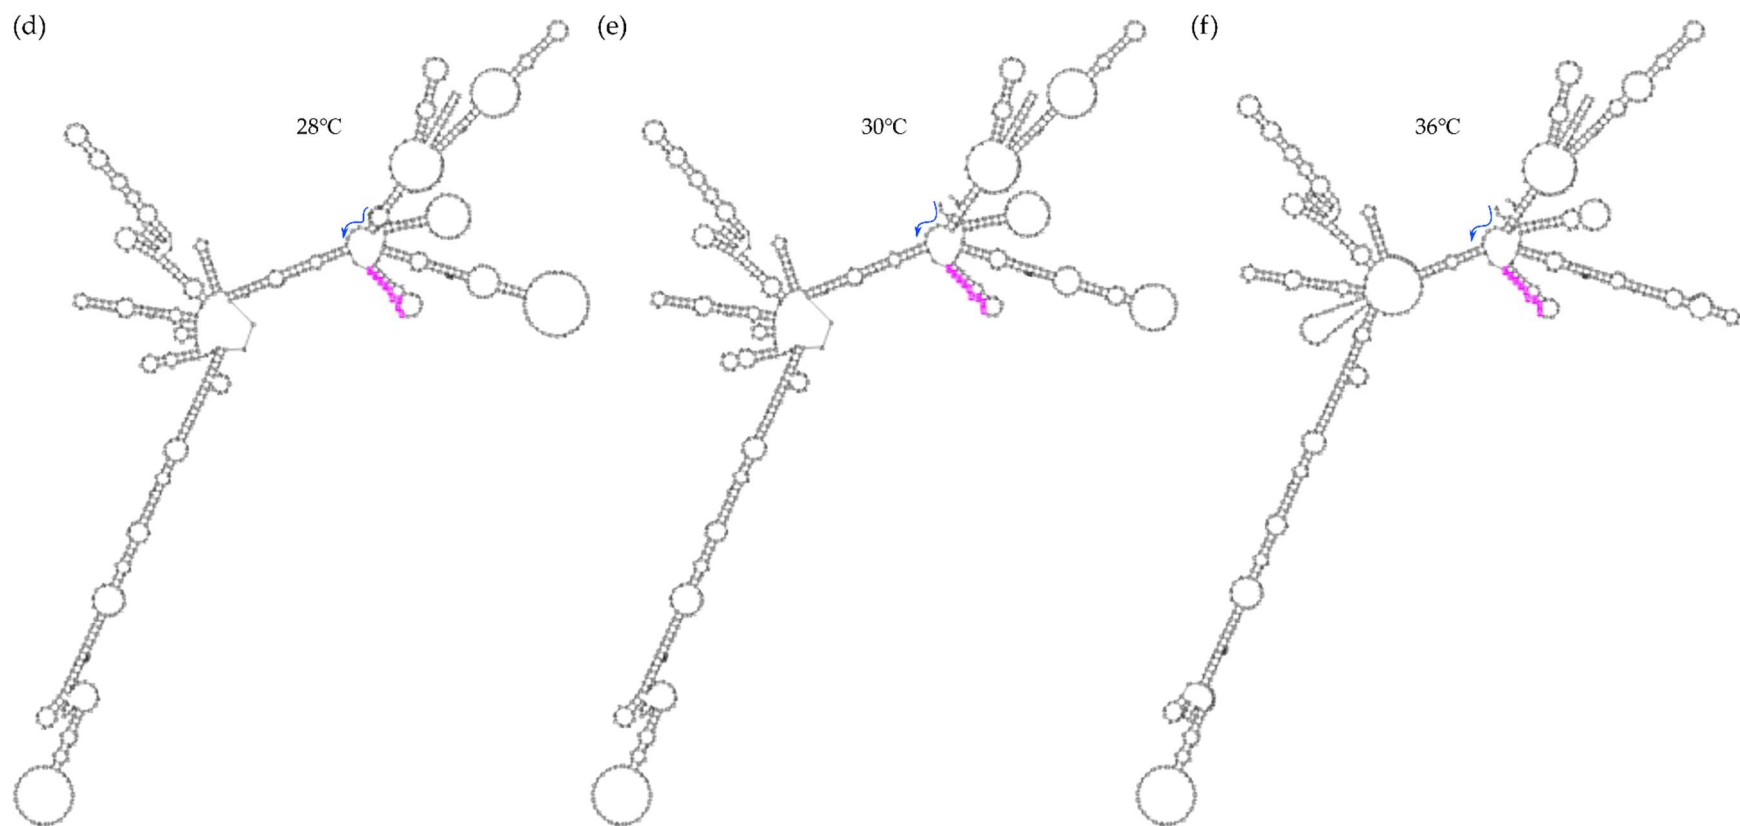

**Figure S4. Emulation of different ionic environments predicting secondary structures of *rpl15e* by a temperature gradient.** Blue arrow represents the beginning of the transcript and magenta nucleotides represent TPS upstream sequence. (a) Structure at 10°C (b) 20°C (c) 26°C (d) 28°C (e) 30°C (f) 36°C (g) 46°C (h) 60°C (i) 77°C.

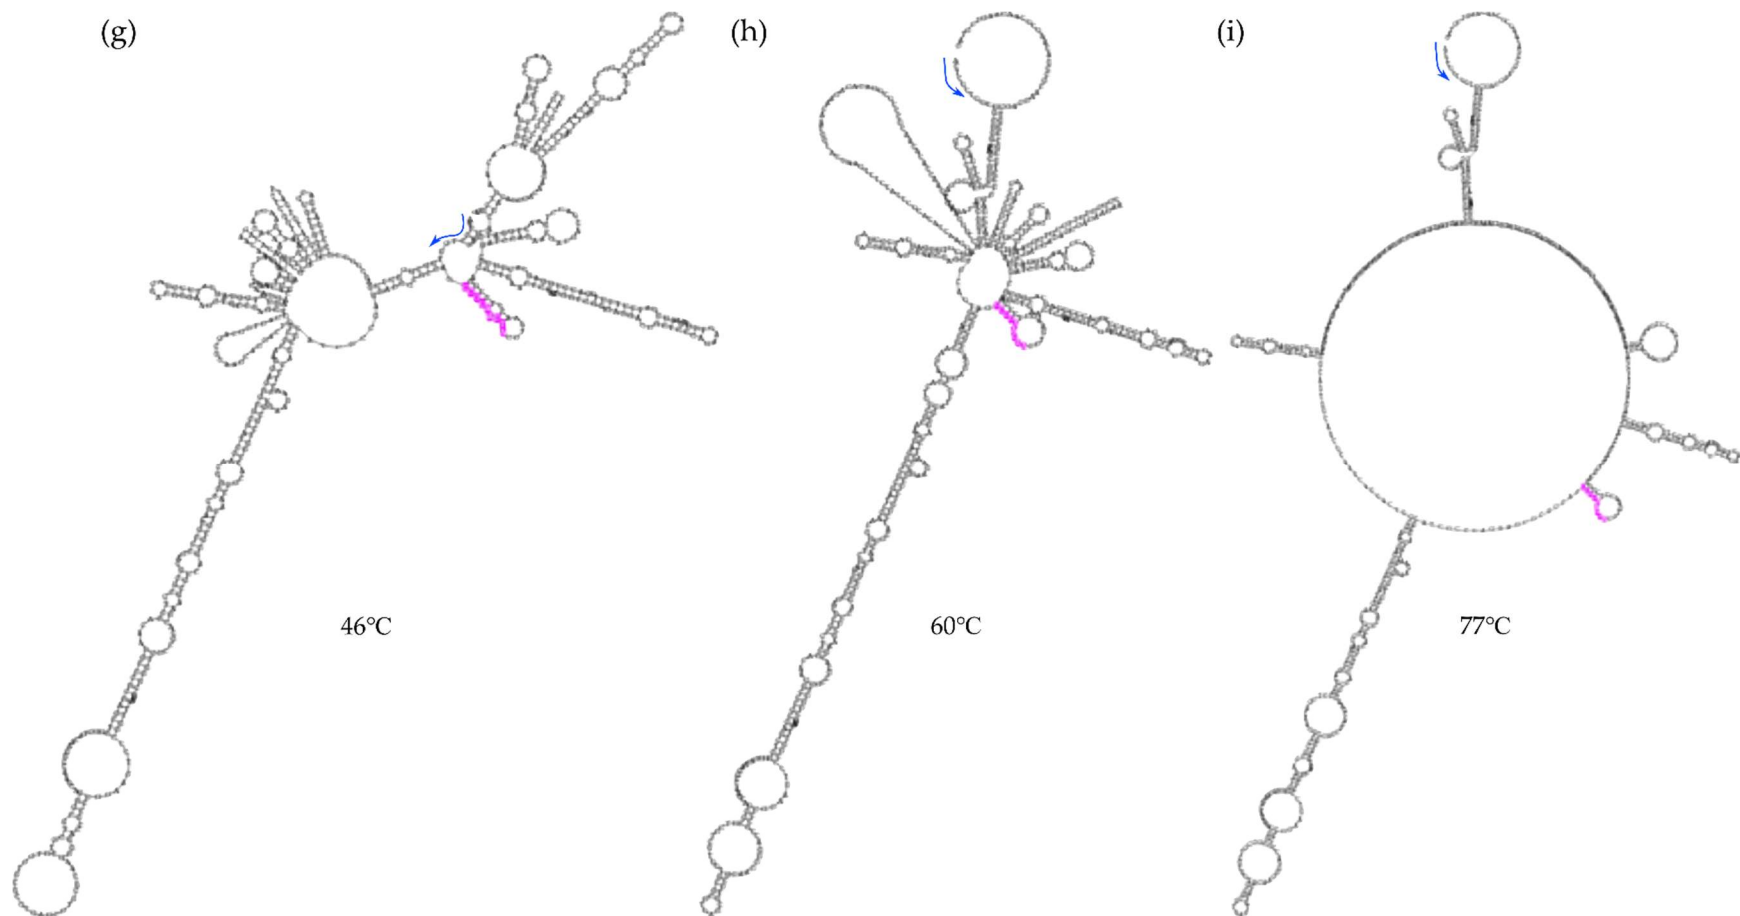

**Figure S4. Emulation of different ionic environments predicting secondary structures of *rpl15e* by a temperature gradient.** Blue arrow represents the beginning of the transcript and magenta nucleotides represent TPS upstream sequence. (a) Structure at 10°C (b) 20°C (c) 26°C (d) 28°C (e) 30°C (f) 36°C (g) 46°C (h) 60°C (i) 77°C.

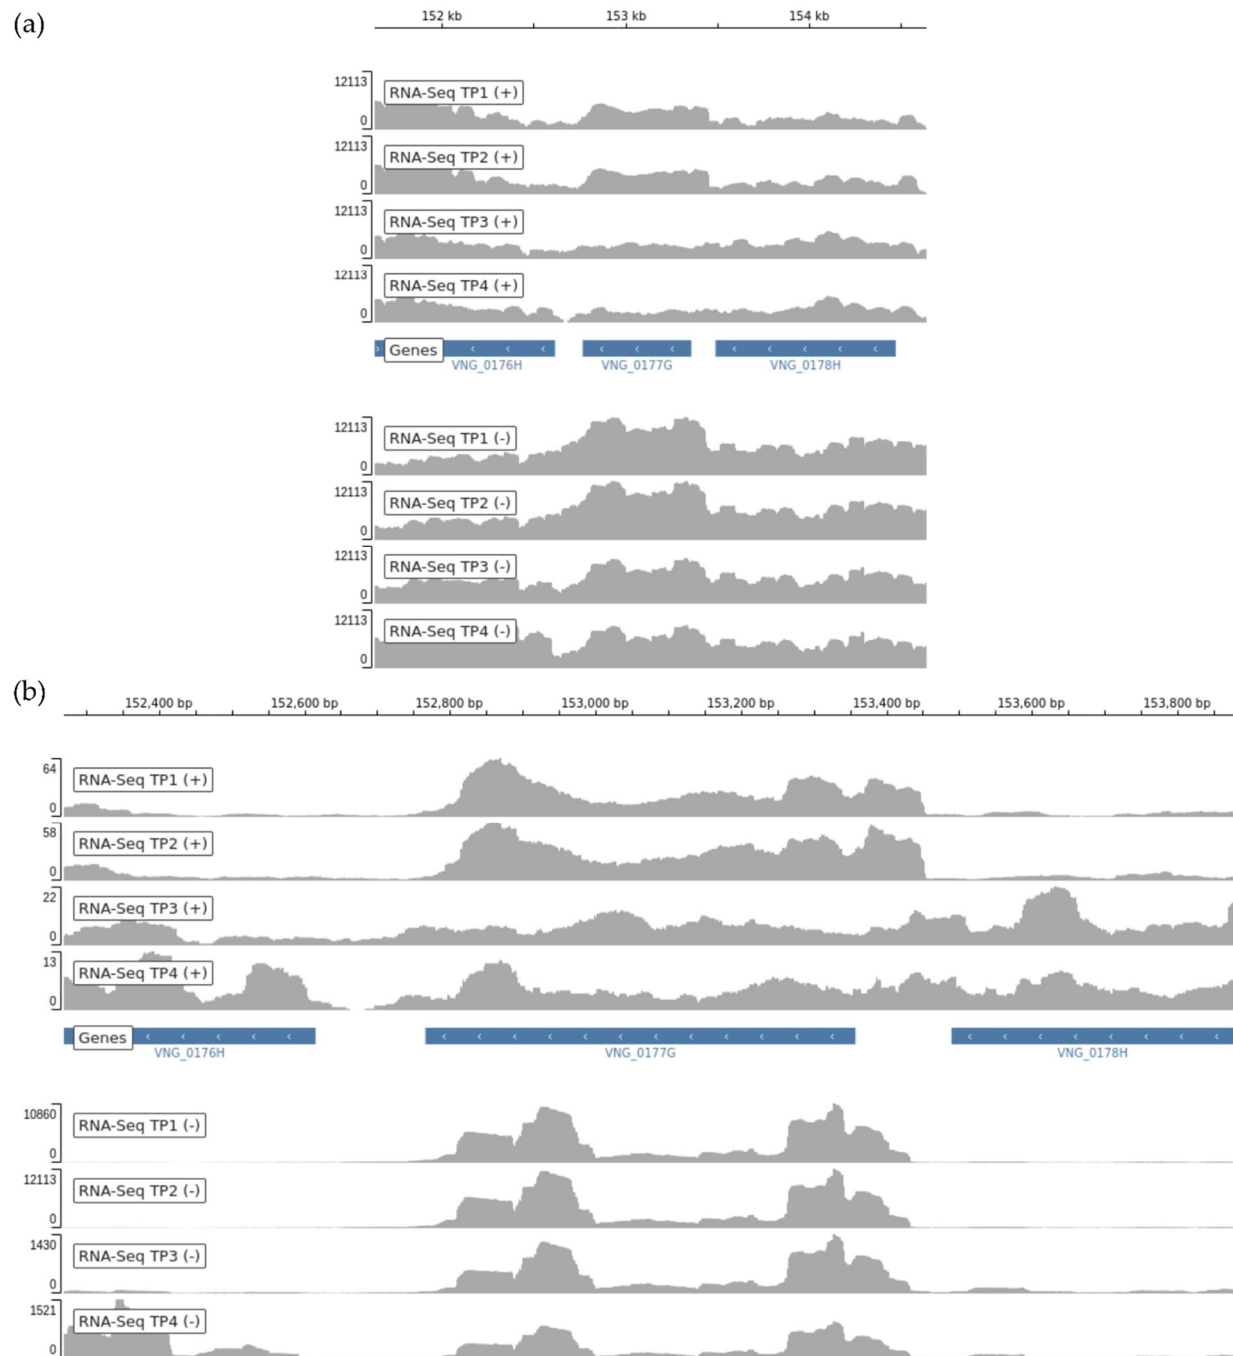

**Figure S5. Coverage of VNG\_0177G (*rpl15e*) region in RNA-seq experiments from different growth phases. TP1: early exponential growth phase; TP2: mid-exponential growth phase; TP4: stationary phase. (a) Fixed data range (b) Data range relative to each track.**
