# Supplementary material for: Low Salt Influences Archaellum-Based Motility, Glycerol Metabolism, and Gas Vesicles Biogenesis in Halobacterium salinarum
Source: Microorganisms. 2022 Dec 10;10(12):2442. doi: 10.3390/microorganisms10122442 (PMC9786353; doi:10.3390/microorganisms10122442)
Supplement: Supplementary file 1 [file microorganisms-10-02442-s001.zip › microorganisms-2047039-Table S1.xlsx]

## Sheet: Key
Tab symbol	Tab name	Description
S1a	Genes-info	For each gene, information of chromosome, start, end, and strand.
S1b	summary	Summary of RNA-seq analysis
S1c	RNA-seq	Number of reads for each gene, steps to calculate fold change and pvalue
S1d	self-self pvalue	p-value
S1e	up- and down-regulated	Genes found up- or down-regulated in our experiment
S1f	comparison_microarray	Comparison of our data with microarray data from Coker et al (2007). WT low salt (2.9M) vs. WT optimal (4.3M)
S1g	Comparison_Proteome	Comparison of our data with proteomics data from Leuko et al (2009). WT low salt (2.6M) vs. WT optimal (4.3M)
S1h	Comparison_Sakrikar	Comparison of our data with RNA-seq data from Sakrikar et al (2021). Δura low salt (3.4M) vs. Δura optimal (4.2M)

## Sheet: S1a. Genes-info
	References
Antisense RNAs	de Almeida JPP et al. Genes (Basel). 2019 Apr 5;10(4):280.
Insertion sequences	Pfeiffer F et al. Microbiol Resour Announc. 2019 Jul 11;8(28):e00429-19.
New transcripts
locus_tag	chr	start	end	strand
VNG_0001H	NC_002607.1	248	1453	+
VNG_0002G	NC_002607.1	1450	2115	+
VNG_0003C	NC_002607.1	2112	3254	+
VNG_0005H	NC_002607.1	3322	5643	+
VNG_0006G	NC_002607.1	5646	7451	-
VNG_0008G	NC_002607.1	7454	8641	-
VNG_0009G	NC_002607.1	8655	9860	-
VNG_0011C	NC_002607.1	9980	11413	+
VNG_0013C	NC_002607.1	11478	12734	-
VNG_0015H	NC_002607.1	13462	13812	-
VNG_0016H	NC_002607.1	13809	14180	-
VNG_0019H	NC_002607.1	15310	15408	+
VNG_0020H	NC_002607.1	15419	16051	-
VNG_0021H	NC_002607.1	16282	17706	+
VNG_0022H	NC_002607.1	18357	18902	+
VNG_0023H	NC_002607.1	18895	19530	+
VNG_0024H	NC_002607.1	19703	20023	-
VNG_0025H	NC_002607.1	20219	20482	-
VNG_0026C	NC_002607.1	20533	21789	-
VNG_0027H	NC_002607.1	22103	22750	-
VNG_0027a	NC_002607.1	23103	23336	+
VNG_0028C	NC_002607.1	23336	23890	+
VNG_0029H	NC_002607.1	24109	24564	-
VNG_0029a	NC_002607.1	24892	25227	+
VNG_0030H	NC_002607.1	26201	26596	+
VNG_0031H	NC_002607.1	26648	29008	+
VNG_0032H	NC_002607.1	29046	29429	+
VNG_0033H	NC_002607.1	29476	29913	-
VNG_0035H	NC_002607.1	30356	31168	-
VNG_0037H	NC_002607.1	31838	32086	+
VNG_0038H	NC_002607.1	32101	32355	+
VNG_0039H	NC_002607.1	32555	32890	-
VNG_0040C	NC_002607.1	33182	33586	-
VNG_0041C	NC_002607.1	33610	33915	-
VNG_0042G	NC_002607.1	34651	35931	-
VNG_0043H	NC_002607.1	36321	36713	+
VNG_0044H	NC_002607.1	36715	37971	+
VNG_0045C	NC_002607.1	38200	39432	+
VNG_0046G	NC_002607.1	39611	40903	-
VNG_0047G	NC_002607.1	40991	41719	+
VNG_0049H	NC_002607.1	41880	42659	+
VNG_0050C	NC_002607.1	42707	44149	+
VNG_0051G	NC_002607.1	44245	45456	-
VNG_0051a	NC_002607.1	45855	47021	-
VNG_0052H	NC_002607.1	47199	48473	-
VNG_0054H	NC_002607.1	49352	50029	-
VNG_0055H	NC_002607.1	49985	50251	+
VNG_0056H	NC_002607.1	50564	52021	-
VNG_0056a	NC_002607.1	52569	53054	+
VNG_0057H	NC_002607.1	53192	54367	+
VNG_0058H	NC_002607.1	54696	55745	-
VNG_0059H	NC_002607.1	56287	57561	+
VNG_0060G	NC_002607.1	57660	58733	-
VNG_0061C	NC_002607.1	58827	60182	+
VNG_0062G	NC_002607.1	60609	61697	-
VNG_0063G	NC_002607.1	61700	62686	-
VNG_0064G	NC_002607.1	62927	63643	+
VNG_0065G	NC_002607.1	63881	64810	+
VNG_0066H	NC_002607.1	64910	65206	+
VNG_0069H	NC_002607.1	66054	66251	+
VNG_0070H	NC_002607.1	66241	66534	+
VNG_0072H	NC_002607.1	67057	67491	-
VNG_0072a	NC_002607.1	67488	67778	-
VNG_0076H	NC_002607.1	69300	69419	-
VNG_0077H	NC_002607.1	69640	70749	+
VNG_0077a	NC_002607.1	70851	71276	+
VNG_0079H	NC_002607.1	71127	71342	-
VNG_0080H	NC_002607.1	71317	71748	+
VNG_0081G	NC_002607.1	71913	72704	+
VNG_0084G	NC_002607.1	72708	73544	-
VNG_0085G	NC_002607.1	73669	74742	+
VNG_0086G	NC_002607.1	74752	76647	-
VNG_0090G	NC_002607.1	76644	77867	-
VNG_0089G	NC_002607.1	77923	78660	-
VNG_0091C	NC_002607.1	78683	79597	-
VNG_0094C	NC_002607.1	79662	80327	-
VNG_0096C	NC_002607.1	80387	81328	-
VNG_0095G	NC_002607.1	81452	82459	+
VNG_0097G	NC_002607.1	82540	82926	+
VNG_0098G	NC_002607.1	82932	83789	-
VNG_0099G	NC_002607.1	83885	84415	-
VNG_0101G	NC_002607.1	84617	84811	-
VNG_0102C	NC_002607.1	84927	85583	-
VNG_0104G	NC_002607.1	85640	86611	-
VNG_0105H	NC_002607.1	86734	87219	-
VNG_0106G	NC_002607.1	87668	89167	+
VNG_0107G	NC_002607.1	89160	90587	+
VNG_0108G	NC_002607.1	90666	93641	+
VNG_0110C	NC_002607.1	93634	94359	+
VNG_0110a	NC_002607.1	94367	94582	+
VNG_t01	NC_002607.1	95227	95300	-
VNG_0112H	NC_002607.1	96010	97176	-
VNG_0113H	NC_002607.1	97444	98121	+
VNG_0115G	NC_002607.1	98226	99008	+
VNG_0115a	NC_002607.1	99375	100541	+
VNG_0116H	NC_002607.1	100891	101715	-
VNG_0116a	NC_002607.1	101734	102018	+
VNG_0117H	NC_002607.1	102034	102309	-
VNG_0118H	NC_002607.1	102309	102692	-
VNG_0119H	NC_002607.1	102863	103021	-
VNG_0120H	NC_002607.1	103021	103146	-
VNG_t02	NC_002607.1	103358	103431	-
VNG_0121H	NC_002607.1	103514	104005	+
VNG_0123G	NC_002607.1	104073	106001	+
VNG_0124C	NC_002607.1	106048	106791	+
VNG_0125H	NC_002607.1	106803	107189	-
VNG_0127C	NC_002607.1	107233	107562	-
VNG_0128C	NC_002607.1	107661	108428	+
VNG_0129G	NC_002607.1	108667	109563	+
VNG_0130H	NC_002607.1	109568	109831	+
VNG_0132C	NC_002607.1	109834	110448	-
VNG_t03	NC_002607.1	110546	110618	-
VNG_0133G	NC_002607.1	110769	112193	+
VNG_0134G	NC_002607.1	112247	112699	+
VNG_0136G	NC_002607.1	112696	113712	+
VNG_0137G	NC_002607.1	113691	115049	-
VNG_t04	NC_002607.1	115152	115224	+
VNG_t05	NC_002607.1	115314	115422	+
VNG_0137a	NC_002607.1	115593	115814	+
VNG_0139H	NC_002607.1	116234	116758	+
VNG_0141H	NC_002607.1	117313	117717	-
VNG_0142C	NC_002607.1	117867	118271	-
VNG_0143H	NC_002607.1	118287	118580	-
VNG_0144H	NC_002607.1	118615	119052	+
VNG_0146H	NC_002607.1	119518	119754	+
VNG_0147C	NC_002607.1	119759	120187	-
VNG_0149G	NC_002607.1	120602	122875	+
VNG_0150H	NC_002607.1	122890	123561	-
VNG_0151C	NC_002607.1	123558	124091	-
VNG_0152G	NC_002607.1	124088	124756	-
VNG_0153C	NC_002607.1	125012	126100	-
VNG_0154G	NC_002607.1	126179	127576	-
VNG_0156C	NC_002607.1	127692	128390	+
VNG_0157G	NC_002607.1	128484	129716	+
VNG_0158G	NC_002607.1	129737	130693	-
VNG_0159G	NC_002607.1	130717	132696	-
VNG_0160G	NC_002607.1	132815	135277	+
VNG_0160a	NC_002607.1	135354	135500	+
VNG_0161G	NC_002607.1	135504	136793	+
VNG_0162G	NC_002607.1	136862	138478	+
VNG_0163G	NC_002607.1	138494	141109	-
VNG_0164G	NC_002607.1	141181	142200	-
VNG_0166G	NC_002607.1	142335	143096	+
VNG_0167H	NC_002607.1	143165	143497	+
VNG_0168H	NC_002607.1	143498	144202	-
VNG_0170C	NC_002607.1	144354	144983	-
VNG_0171C	NC_002607.1	145185	145907	+
VNG_0172G	NC_002607.1	145879	148470	-
VNG_0174G	NC_002607.1	148766	151168	+
VNG_0175G	NC_002607.1	151174	151860	+
VNG_0176H	NC_002607.1	151875	152615	-
VNG_0177G	NC_002607.1	152767	153357	-
VNG_0178H	NC_002607.1	153490	154470	-
VNG_0179C	NC_002607.1	154694	155596	-
VNG_0180G	NC_002607.1	155681	156505	-
VNG_0181G	NC_002607.1	156613	157431	+
VNG_0183G	NC_002607.1	157481	158308	+
VNG_0184H	NC_002607.1	158480	159292	+
VNG_0186G	NC_002607.1	159342	160433	+
VNG_0187H	NC_002607.1	160464	161111	-
VNG_0188H	NC_002607.1	161207	162586	+
VNG_0189C	NC_002607.1	162656	164095	+
VNG_0190C	NC_002607.1	164151	165113	+
VNG_0192G	NC_002607.1	165152	166333	-
VNG_0194H	NC_002607.1	166336	166503	-
VNG_0195H	NC_002607.1	166681	167199	-
VNG_t06	NC_002607.1	167315	167388	+
VNG_0197C	NC_002607.1	168184	169212	-
VNG_0197a	NC_002607.1	169389	169886	+
VNG_0198H	NC_002607.1	169721	170389	-
VNG_0199H	NC_002607.1	170386	170754	-
VNG_0200C	NC_002607.1	170747	171424	-
VNG_0200a	NC_002607.1	171424	171927	-
VNG_0204H	NC_002607.1	171924	172646	-
VNG_0207H	NC_002607.1	175115	175471	+
VNG_0208H	NC_002607.1	175471	175920	+
VNG_0209H	NC_002607.1	175913	176947	+
VNG_0210H	NC_002607.1	177093	177296	-
VNG_0213H	NC_002607.1	178329	179321	+
VNG_0214C	NC_002607.1	179707	180366	-
VNG_0215C	NC_002607.1	180916	183489	-
VNG_0216H	NC_002607.1	183649	183858	-
VNG_0217H	NC_002607.1	184345	184965	+
VNG_0218G	NC_002607.1	184985	186631	-
VNG_0219H	NC_002607.1	186763	187731	+
VNG_0220H	NC_002607.1	187731	188303	+
VNG_0222C	NC_002607.1	188303	189565	+
VNG_0222a	NC_002607.1	189562	190056	+
VNG_0223G	NC_002607.1	190053	191009	-
VNG_t07	NC_002607.1	191112	191196	+
VNG_0226G	NC_002607.1	191310	192380	+
VNG_0227H	NC_002607.1	192372	192734	-
VNG_0228G	NC_002607.1	192826	193377	+
VNG_0230C	NC_002607.1	193384	195258	+
VNG_0231C	NC_002607.1	195301	195984	+
VNG_0233H	NC_002607.1	196042	196281	-
VNG_0234C	NC_002607.1	196288	196665	-
VNG_0234a	NC_002607.1	196789	197046	-
VNG_0237H	NC_002607.1	197052	197186	-
VNG_0239C	NC_002607.1	197195	197482	-
VNG_0238H	NC_002607.1	197630	197848	+
VNG_0240C	NC_002607.1	197876	198598	-
VNG_0243C	NC_002607.1	198651	199955	-
VNG_0243a	NC_002607.1	199955	200293	-
VNG_0244H	NC_002607.1	200377	200991	+
VNG_0245G	NC_002607.1	201025	201612	+
VNG_0247C	NC_002607.1	201609	202517	+
VNG_0248C	NC_002607.1	202509	203273	-
VNG_0249G	NC_002607.1	203276	205708	-
VNG_0250C	NC_002607.1	205790	206539	-
VNG_0251C	NC_002607.1	206579	207418	-
VNG_0252C	NC_002607.1	207474	208184	-
VNG_0254G	NC_002607.1	208286	209257	-
VNG_0255C	NC_002607.1	209439	210038	+
VNG_0256H	NC_002607.1	210031	210582	+
VNG_0258H	NC_002607.1	210639	210989	-
VNG_0259G	NC_002607.1	211101	211634	+
VNG_0261H	NC_002607.1	211736	211852	+
VNG_0262C	NC_002607.1	211896	213011	+
VNG_0264H	NC_002607.1	213067	214425	+
VNG_0265G	NC_002607.1	214442	215515	-
VNG_0266H	NC_002607.1	215637	216068	+
VNG_0267H	NC_002607.1	216068	216961	+
VNG_0268C	NC_002607.1	216982	218070	+
VNG_0270C	NC_002607.1	218130	219332	+
VNG_0271C	NC_002607.1	219360	220454	+
VNG_0272H	NC_002607.1	220482	220949	+
VNG_0274C	NC_002607.1	221005	221610	+
VNG_0277G	NC_002607.1	221649	223274	+
VNG_0277a	NC_002607.1	223390	224193	+
VNG_0280H	NC_002607.1	223518	224468	-
VNG_0280a	NC_002607.1	224180	224350	-
VNG_0281G	NC_002607.1	224467	225588	+
VNG_0283C	NC_002607.1	225590	226024	-
VNG_0282H	NC_002607.1	226021	226179	-
VNG_0282a	NC_002607.1	226272	227099	+
VNG_0284C	NC_002607.1	227135	228829	+
VNG_0285C	NC_002607.1	229052	229441	+
VNG_0286C	NC_002607.1	229443	230597	+
VNG_0287H	NC_002607.1	230608	230883	+
VNG_0287a	NC_002607.1	230650	231078	-
VNG_0289H	NC_002607.1	231155	231817	-
VNG_0291H	NC_002607.1	231863	232645	-
VNG_0293H	NC_002607.1	232683	232952	-
VNG_0294G	NC_002607.1	233137	233841	+
VNG_0296H	NC_002607.1	233894	234811	+
VNG_0297H	NC_002607.1	234808	235626	-
VNG_0298H	NC_002607.1	235698	236321	-
VNG_0300C	NC_002607.1	236318	237082	-
VNG_0301C	NC_002607.1	237133	237666	-
VNG_0303G	NC_002607.1	237843	239951	+
VNG_0306C	NC_002607.1	240007	240456	-
VNG_0305G	NC_002607.1	240541	241296	+
VNG_0307G	NC_002607.1	241293	242585	+
VNG_0308G	NC_002607.1	242582	243412	+
VNG_0309C	NC_002607.1	243437	244234	+
VNG_0311H	NC_002607.1	244231	244536	-
VNG_0310C	NC_002607.1	244639	245802	+
VNG_0312H	NC_002607.1	245809	246219	-
VNG_0314G	NC_002607.1	246267	246947	-
VNG_0315G	NC_002607.1	247008	247967	-
VNG_0316C	NC_002607.1	248258	248971	+
VNG_0318G	NC_002607.1	248973	250817	-
VNG_0319H	NC_002607.1	251021	251263	+
VNG_0320H	NC_002607.1	251273	251884	-
VNG_0321G	NC_002607.1	251940	253118	-
VNG_0322H	NC_002607.1	253158	253667	-
VNG_0323H	NC_002607.1	253700	253876	-
VNG_0324G	NC_002607.1	253914	255653	-
VNG_0326G	NC_002607.1	255742	257811	-
VNG_0327G	NC_002607.1	257872	258939	-
VNG_0329G	NC_002607.1	258965	260251	-
VNG_0330G	NC_002607.1	260291	262549	-
VNG_0331H	NC_002607.1	262683	263072	+
VNG_0332C	NC_002607.1	263073	263978	-
VNG_0335G	NC_002607.1	264253	264945	+
VNG_0337H	NC_002607.1	265595	266869	-
VNG_0339H	NC_002607.1	267340	268041	+
VNG_0340C	NC_002607.1	268046	268906	-
VNG_0342G	NC_002607.1	268899	272471	-
VNG_0343H	NC_002607.1	272493	272777	-
VNG_0345G	NC_002607.1	272907	274394	+
VNG_0346H	NC_002607.1	274440	274832	-
VNG_0347H	NC_002607.1	274891	275271	-
VNG_0349G	NC_002607.1	275494	277983	+
VNG_0351C	NC_002607.1	278144	279412	+
VNG_0352H	NC_002607.1	279446	279664	+
VNG_0354C	NC_002607.1	279704	280474	+
VNG_0355G	NC_002607.1	280487	282370	-
VNG_0357H	NC_002607.1	282398	282826	+
VNG_0357a	NC_002607.1	282451	282732	-
VNG_0359C	NC_002607.1	282823	283725	+
VNG_0360C	NC_002607.1	283764	284177	-
VNG_0361C	NC_002607.1	284272	285273	+
VNG_0363G	NC_002607.1	285278	286072	+
VNG_0364G	NC_002607.1	286131	286952	+
VNG_0365G	NC_002607.1	286968	288011	-
VNG_0367H	NC_002607.1	288101	288445	+
VNG_0368C	NC_002607.1	288491	289006	+
VNG_0368a	NC_002607.1	289028	289510	+
VNG_0370H	NC_002607.1	289515	290270	-
VNG_0371G	NC_002607.1	290379	291539	+
VNG_0373H	NC_002607.1	291643	291984	+
VNG_0374G	NC_002607.1	291994	292431	-
VNG_0375G	NC_002607.1	292433	292606	-
VNG_0376G	NC_002607.1	292670	293860	-
VNG_0378C	NC_002607.1	293888	295249	-
VNG_0380G	NC_002607.1	295310	296266	-
VNG_0382G	NC_002607.1	296344	297144	+
VNG_0383H	NC_002607.1	297171	297530	+
VNG_0384G	NC_002607.1	297545	299011	+
VNG_0386G	NC_002607.1	299008	299583	+
VNG_0387G	NC_002607.1	299568	300425	+
VNG_0388C	NC_002607.1	300471	300941	+
VNG_0389C	NC_002607.1	300938	301228	-
VNG_0390G	NC_002607.1	301287	302276	+
VNG_0391C	NC_002607.1	302277	302999	-
VNG_0393C	NC_002607.1	303046	304194	-
VNG_0394C	NC_002607.1	304268	305170	-
VNG_0396C	NC_002607.1	305431	305844	+
VNG_0398G	NC_002607.1	305902	306699	+
VNG_0399H	NC_002607.1	306701	307198	-
VNG_0401G	NC_002607.1	307290	309215	-
VNG_0401a	NC_002607.1	309284	309496	+
VNG_0402H	NC_002607.1	309533	309685	-
VNG_0403G	NC_002607.1	309807	311312	+
VNG_0404H	NC_002607.1	311391	311921	+
VNG_0405C	NC_002607.1	311957	312946	+
VNG_0406C	NC_002607.1	313105	314163	+
VNG_0407H	NC_002607.1	314156	315184	-
VNG_0408H	NC_002607.1	315206	316276	-
VNG_0409C	NC_002607.1	316309	318105	-
VNG_0410G	NC_002607.1	318208	319275	+
VNG_0412G	NC_002607.1	319297	321744	-
VNG_0414G	NC_002607.1	321793	323409	-
VNG_0415G	NC_002607.1	323579	324955	+
VNG_0417H	NC_002607.1	325020	325661	+
VNG_0419C	NC_002607.1	325698	326195	+
VNG_0420H	NC_002607.1	326196	326384	-
VNG_0421C	NC_002607.1	326468	326947	+
VNG_0422G	NC_002607.1	326955	328298	-
VNG_0424C	NC_002607.1	328415	328807	+
VNG_0425G	NC_002607.1	328807	329523	+
VNG_0426G	NC_002607.1	329653	329967	-
VNG_0427G	NC_002607.1	330079	331341	+
VNG_0428G	NC_002607.1	331342	332112	-
VNG_0429H	NC_002607.1	332196	332681	+
VNG_0430H	NC_002607.1	332688	333713	-
VNG_0431G	NC_002607.1	333816	334244	-
VNG_0433C	NC_002607.1	334368	334703	+
VNG_0435H	NC_002607.1	334798	335064	-
VNG_0436G	NC_002607.1	335061	336626	-
VNG_0437C	NC_002607.1	336723	338003	+
VNG_0439C	NC_002607.1	338014	339384	-
VNG_0438G	NC_002607.1	339490	339819	+
VNG_0440C	NC_002607.1	339822	340952	-
VNG_0441H	NC_002607.1	341012	341647	+
VNG_0442G	NC_002607.1	341670	342908	-
VNG_0444G	NC_002607.1	342946	343860	-
VNG_0447H	NC_002607.1	343909	345117	-
VNG_0446G	NC_002607.1	345205	346275	+
VNG_0448G	NC_002607.1	346272	346910	+
VNG_0450C	NC_002607.1	346951	347355	+
VNG_0451G	NC_002607.1	347367	348047	-
VNG_0452G	NC_002607.1	348053	348898	-
VNG_0453G	NC_002607.1	348905	350605	-
VNG_0455G	NC_002607.1	350607	351566	-
VNG_0457G	NC_002607.1	351622	352656	-
VNG_0458G	NC_002607.1	352883	353887	+
VNG_0459G	NC_002607.1	353960	354931	+
VNG_0461G	NC_002607.1	355258	356568	+
VNG_0462C	NC_002607.1	356605	356889	-
VNG_0463C	NC_002607.1	356891	357508	-
VNG_0465G	NC_002607.1	357501	358391	-
VNG_0466C	NC_002607.1	358388	359239	-
VNG_0467G	NC_002607.1	359388	360215	-
VNG_0468C	NC_002607.1	360279	361511	-
VNG_0469H	NC_002607.1	361705	363387	-
VNG_0470G	NC_002607.1	363359	364117	-
VNG_0471C	NC_002607.1	364276	364476	-
VNG_0472H	NC_002607.1	364473	364889	-
VNG_0473G	NC_002607.1	365304	366173	-
VNG_0474G	NC_002607.1	366170	367918	-
VNG_0475C	NC_002607.1	368167	368811	+
VNG_0475a	NC_002607.1	368808	369404	+
VNG_0478C	NC_002607.1	369409	369798	-
VNG_0479G	NC_002607.1	369837	370787	-
VNG_0481G	NC_002607.1	370841	372526	-
VNG_0482H	NC_002607.1	372939	373508	-
VNG_0483C	NC_002607.1	373577	374761	-
VNG_0484G	NC_002607.1	374853	376823	+
VNG_0485H	NC_002607.1	376820	377209	-
VNG_0486G	NC_002607.1	377233	377808	-
VNG_0487H	NC_002607.1	377808	378383	-
VNG_0488H	NC_002607.1	378529	379233	-
VNG_0489G	NC_002607.1	379302	380477	-
VNG_0491G	NC_002607.1	380553	382442	-
VNG_0492H	NC_002607.1	382599	383294	-
VNG_0494G	NC_002607.1	383334	383987	-
VNG_0496H	NC_002607.1	384063	384446	-
VNG_0498C	NC_002607.1	384499	385005	-
VNG_0499G	NC_002607.1	385002	385913	-
VNG_0500G	NC_002607.1	386009	386755	+
VNG_0501G	NC_002607.1	386766	387935	-
VNG_0502G	NC_002607.1	388169	389290	+
VNG_0503C	NC_002607.1	389355	390143	+
VNG_0504G	NC_002607.1	390140	391321	-
VNG_0505C	NC_002607.1	391432	392532	+
VNG_0506H	NC_002607.1	392529	392813	-
VNG_0507C	NC_002607.1	392861	393706	-
VNG_0508H	NC_002607.1	393802	393999	+
VNG_0509H	NC_002607.1	394049	394186	+
VNG_0510G	NC_002607.1	394230	395450	-
VNG_0511H	NC_002607.1	395657	395887	+
VNG_0512G	NC_002607.1	395945	397108	+
VNG_0514C	NC_002607.1	397105	399756	+
VNG_0516H	NC_002607.1	399808	400059	+
VNG_0516a	NC_002607.1	400047	400475	-
VNG_0518H	NC_002607.1	400501	400782	-
VNG_0520H	NC_002607.1	400823	401008	-
VNG_0521G	NC_002607.1	401122	403827	+
VNG_0523G	NC_002607.1	403843	404586	-
VNG_0524G	NC_002607.1	404888	405814	+
VNG_0525C	NC_002607.1	405851	407275	+
VNG_0527C	NC_002607.1	407277	408491	+
VNG_0527a	NC_002607.1	408603	409097	+
VNG_0529H	NC_002607.1	408654	409160	-
VNG_0530G	NC_002607.1	409159	409593	+
VNG_t08	NC_002607.1	409659	409731	+
VNG_0530a	NC_002607.1	409836	409991	-
VNG_0532H	NC_002607.1	410039	410416	-
VNG_0532a	NC_002607.1	410105	410410	+
VNG_0533H	NC_002607.1	410466	411128	+
VNG_0534C	NC_002607.1	411320	412003	+
VNG_0535C	NC_002607.1	412027	412716	-
VNG_0536G	NC_002607.1	412713	413390	-
VNG_0537C	NC_002607.1	413539	416253	-
VNG_0539C	NC_002607.1	416246	416737	-
VNG_0540G	NC_002607.1	416799	417755	-
VNG_0541G	NC_002607.1	417903	419099	-
VNG_0542C	NC_002607.1	419223	420488	+
VNG_0543H	NC_002607.1	420476	421180	-
VNG_0544H	NC_002607.1	421208	421615	+
VNG_0544a	NC_002607.1	421243	421842	-
VNG_0546C	NC_002607.1	421905	422657	-
VNG_0548C	NC_002607.1	422662	422844	-
VNG_0549G	NC_002607.1	422844	423647	-
VNG_0550G	NC_002607.1	423644	423817	-
VNG_0551G	NC_002607.1	423822	424103	-
VNG_0553C	NC_002607.1	424289	425932	+
VNG_0553a	NC_002607.1	425623	425889	+
VNG_0555C	NC_002607.1	425790	428312	-
VNG_0556G	NC_002607.1	428425	429981	+
VNG_t09	NC_002607.1	430148	430222	-
VNG_0557H	NC_002607.1	430285	430965	-
VNG_0559G	NC_002607.1	431034	431600	-
VNG_0560C	NC_002607.1	431659	433443	-
VNG_0562C	NC_002607.1	433440	435059	-
VNG_0563G	NC_002607.1	435056	436537	-
VNG_0565C	NC_002607.1	436530	436886	-
VNG_0564H	NC_002607.1	436883	437350	-
VNG_0566C	NC_002607.1	437347	437877	-
VNG_0570H	NC_002607.1	437874	438200	-
VNG_0568C	NC_002607.1	438197	438472	-
VNG_0571C	NC_002607.1	438469	439563	-
VNG_0572G	NC_002607.1	439733	440911	-
VNG_0572a	NC_002607.1	441018	441509	+
VNG_0573C	NC_002607.1	441519	442067	-
VNG_0574C	NC_002607.1	442210	442467	+
VNG_0575G	NC_002607.1	442518	443819	+
VNG_0576C	NC_002607.1	443949	444683	+
VNG_0578H	NC_002607.1	444728	445168	+
VNG_0579H	NC_002607.1	445263	445523	-
VNG_0581H	NC_002607.1	445516	445803	-
VNG_0582C	NC_002607.1	445897	446661	-
VNG_0583G	NC_002607.1	446666	447478	-
VNG_0584H	NC_002607.1	447481	448311	-
VNG_0585H	NC_002607.1	448314	448700	-
VNG_0586C	NC_002607.1	448700	449389	-
VNG_0587H	NC_002607.1	449465	450376	-
VNG_0590H	NC_002607.1	450472	450960	+
VNG_0591C	NC_002607.1	450957	451601	-
VNG_0592G	NC_002607.1	451701	452384	-
VNG_0593G	NC_002607.1	452492	453469	+
VNG_0593a	NC_002607.1	453659	453853	-
VNG_0594H	NC_002607.1	454135	454461	+
VNG_0595H	NC_002607.1	454472	455086	-
VNG_0596H	NC_002607.1	455273	456031	+
VNG_0597H	NC_002607.1	456082	456483	+
VNG_0598C	NC_002607.1	456480	457589	-
VNG_0600C	NC_002607.1	457591	458673	-
VNG_0599C	NC_002607.1	458746	459027	+
VNG_0601H	NC_002607.1	459075	459317	+
VNG_0602C	NC_002607.1	459333	459794	-
VNG_r01	NC_002607.1	459886	460196	-
VNG_0604H	NC_002607.1	460447	460728	+
VNG_0608C	NC_002607.1	461747	462160	-
VNG_0609C	NC_002607.1	462193	462840	-
VNG_0610G	NC_002607.1	462955	463797	-
VNG_t10	NC_002607.1	463914	463988	+
VNG_0611H	NC_002607.1	464523	465503	+
VNG_0611a	NC_002607.1	465856	466251	+
VNG_0612H	NC_002607.1	466389	466583	-
VNG_0613H	NC_002607.1	466928	467362	-
VNG_0613a	NC_002607.1	466970	467221	+
VNG_0614G	NC_002607.1	467390	469768	-
VNG_0615C	NC_002607.1	469912	471549	-
VNG_0617H	NC_002607.1	471670	472596	-
VNG_0620G	NC_002607.1	472598	473500	-
VNG_0622H	NC_002607.1	473684	474712	-
VNG_0623G	NC_002607.1	474803	476572	+
VNG_0624H	NC_002607.1	476591	477022	-
VNG_0626G	NC_002607.1	477027	477500	-
VNG_0627G	NC_002607.1	477574	478410	+
VNG_0628G	NC_002607.1	478480	479733	+
VNG_0629G	NC_002607.1	479857	480999	-
VNG_0630G	NC_002607.1	480996	481397	-
VNG_0631C	NC_002607.1	481494	483239	+
VNG_0632G	NC_002607.1	483309	484460	+
VNG_0633G	NC_002607.1	484457	485068	+
VNG_0635G	NC_002607.1	485194	485604	+
VNG_0636G	NC_002607.1	485597	486304	+
VNG_0637G	NC_002607.1	486301	487989	+
VNG_0639G	NC_002607.1	487990	489045	+
VNG_0640G	NC_002607.1	489042	489503	+
VNG_0641C	NC_002607.1	489561	489821	+
VNG_0642C	NC_002607.1	489818	490126	+
VNG_0643G	NC_002607.1	490126	490428	+
VNG_0646G	NC_002607.1	490430	492508	+
VNG_0647G	NC_002607.1	492509	494068	+
VNG_0648G	NC_002607.1	494065	495552	+
VNG_0650C	NC_002607.1	495620	497053	+
VNG_0651G	NC_002607.1	497085	497903	+
VNG_0653G	NC_002607.1	498281	499984	+
VNG_0654C	NC_002607.1	499989	500732	-
VNG_0656H	NC_002607.1	500787	501068	-
VNG_0656a	NC_002607.1	501128	501214	+
VNG_0657G	NC_002607.1	501272	503053	-
VNG_0659H	NC_002607.1	503179	503406	-
VNG_0660H	NC_002607.1	503448	503810	-
VNG_0662G	NC_002607.1	503953	504810	+
VNG_0664G	NC_002607.1	504860	505708	+
VNG_0665G	NC_002607.1	505709	506476	-
VNG_0666G	NC_002607.1	506583	507962	+
VNG_0667G	NC_002607.1	507963	508619	+
VNG_0668C	NC_002607.1	508660	509556	+
VNG_0669H	NC_002607.1	509553	510302	+
VNG_0670H	NC_002607.1	510308	510787	-
VNG_0671H	NC_002607.1	510805	511413	-
VNG_0673G	NC_002607.1	511535	511951	+
VNG_0674C	NC_002607.1	511953	512927	+
VNG_0675C	NC_002607.1	512985	513917	+
VNG_0676C	NC_002607.1	513894	514277	-
VNG_0678G	NC_002607.1	514274	515461	-
VNG_0677H	NC_002607.1	515503	515790	-
VNG_0679G	NC_002607.1	515836	516978	-
VNG_0680G	NC_002607.1	517113	518156	+
VNG_0681G	NC_002607.1	518183	519043	-
VNG_0682C	NC_002607.1	519129	519815	+
VNG_0683C	NC_002607.1	519914	520705	+
VNG_0684G	NC_002607.1	520705	521568	+
VNG_0686C	NC_002607.1	521594	522283	+
VNG_0688H	NC_002607.1	522686	523456	+
VNG_0689G	NC_002607.1	523515	524378	+
VNG_0690C	NC_002607.1	524375	526114	+
VNG_0692C	NC_002607.1	526107	527156	+
VNG_0694G	NC_002607.1	527209	527625	+
VNG_0698H	NC_002607.1	527835	528500	-
VNG_0700G	NC_002607.1	528770	531343	+
VNG_0702H	NC_002607.1	531405	531611	+
VNG_0703H	NC_002607.1	531750	532034	+
VNG_0704C	NC_002607.1	532038	532409	-
VNG_0705C	NC_002607.1	532495	534006	-
VNG_0707C	NC_002607.1	534141	534779	+
VNG_0708H	NC_002607.1	534840	535388	+
VNG_0709C	NC_002607.1	535549	536508	+
VNG_0711C	NC_002607.1	536584	537165	+
VNG_0713C	NC_002607.1	537212	537907	+
VNG_0715G	NC_002607.1	537985	539415	+
VNG_0716G	NC_002607.1	539412	541040	-
VNG_0717H	NC_002607.1	541134	541460	+
VNG_0718C	NC_002607.1	541473	542150	-
VNG_0719G	NC_002607.1	542247	543044	+
VNG_0720G	NC_002607.1	543049	544476	-
VNG_0723G	NC_002607.1	544564	545673	-
VNG_0724H	NC_002607.1	545760	546020	+
VNG_0725H	NC_002607.1	546070	546978	+
VNG_0726C	NC_002607.1	546988	547578	-
VNG_0727C	NC_002607.1	547992	549476	+
VNG_0729H	NC_002607.1	549641	550258	+
VNG_0730C	NC_002607.1	550255	551166	-
VNG_0731H	NC_002607.1	551252	551722	+
VNG_0732G	NC_002607.1	551723	552742	-
VNG_0733H	NC_002607.1	552825	553373	+
VNG_0734G	NC_002607.1	553409	554386	-
VNG_0735G	NC_002607.1	554704	555291	+
VNG_0736G	NC_002607.1	555295	557208	+
VNG_0738H	NC_002607.1	557214	557657	-
VNG_0737H	NC_002607.1	557749	557973	+
VNG_0740C	NC_002607.1	557985	558617	-
VNG_0741H	NC_002607.1	558704	559006	+
VNG_0742H	NC_002607.1	559020	559724	-
VNG_0743H	NC_002607.1	559815	560261	+
VNG_0745G	NC_002607.1	560272	562254	-
VNG_0746C	NC_002607.1	562241	563569	-
VNG_0748G	NC_002607.1	563560	565830	-
VNG_0749G	NC_002607.1	565827	567884	-
VNG_0750C	NC_002607.1	568228	568947	+
VNG_0751C	NC_002607.1	569022	569336	+
VNG_0752G	NC_002607.1	569376	570320	-
VNG_0753G	NC_002607.1	570402	571580	-
VNG_0754C	NC_002607.1	571614	572270	-
VNG_0755C	NC_002607.1	572464	573042	+
VNG_0757G	NC_002607.1	573251	573769	+
VNG_0758C	NC_002607.1	573769	574440	+
VNG_0759H	NC_002607.1	574437	575162	+
VNG_0761G	NC_002607.1	575197	575892	+
VNG_0762H	NC_002607.1	575902	576015	-
VNG_0763G	NC_002607.1	576121	576747	+
VNG_0764C	NC_002607.1	576838	577914	+
VNG_0765H	NC_002607.1	577924	578094	-
VNG_0766G	NC_002607.1	578203	579231	+
VNG_0767H	NC_002607.1	579292	579477	+
VNG_0768H	NC_002607.1	579518	579742	+
VNG_0769H	NC_002607.1	579788	580198	+
VNG_0771G	NC_002607.1	580451	581962	-
VNG_0771a	NC_002607.1	582038	582886	-
VNG_0772H	NC_002607.1	582075	582338	+
VNG_0775G	NC_002607.1	583046	584185	+
VNG_0777G	NC_002607.1	584205	584645	-
VNG_0778C	NC_002607.1	584642	585127	-
VNG_0779a	NC_002607.1	587125	588669	-
VNG_0782H	NC_002607.1	588702	590003	-
VNG_0784G	NC_002607.1	590056	590733	-
VNG_0786G	NC_002607.1	590830	591279	+
VNG_0787G	NC_002607.1	591340	591960	-
VNG_0788H	NC_002607.1	591957	592202	-
VNG_0789C	NC_002607.1	592199	593302	-
VNG_0790G	NC_002607.1	593307	593774	-
VNG_t11	NC_002607.1	593999	594070	+
VNG_0793G	NC_002607.1	594361	596730	-
VNG_0794G	NC_002607.1	596727	597866	-
VNG_0795G	NC_002607.1	598238	598744	+
VNG_0796G	NC_002607.1	598879	600096	+
VNG_0798H	NC_002607.1	600156	601424	+
VNG_0799C	NC_002607.1	601488	602189	+
VNG_0800H	NC_002607.1	602186	602782	+
VNG_t12	NC_002607.1	602925	602997	-
VNG_0801C	NC_002607.1	603037	603327	-
VNG_0804C	NC_002607.1	603534	604346	+
VNG_0806G	NC_002607.1	604372	606708	-
VNG_0808G	NC_002607.1	606864	608225	-
VNG_0810H	NC_002607.1	608281	608895	+
VNG_0811H	NC_002607.1	608896	609219	-
VNG_0812G	NC_002607.1	609510	611960	+
VNG_0813G	NC_002607.1	611957	613207	+
VNG_0814C	NC_002607.1	613227	613859	-
VNG_0815G	NC_002607.1	613996	615006	+
VNG_0816G	NC_002607.1	615200	616840	+
VNG_0818C	NC_002607.1	616933	618651	+
VNG_0819C	NC_002607.1	618648	620333	+
VNG_t13	NC_002607.1	620463	620533	-
VNG_0821C	NC_002607.1	620587	621240	-
VNG_0822C	NC_002607.1	621237	623372	-
VNG_0823G	NC_002607.1	623369	625021	-
VNG_0824G	NC_002607.1	625085	625786	-
VNG_0825C	NC_002607.1	625866	626312	-
VNG_0826C	NC_002607.1	626458	627132	+
VNG_0828H	NC_002607.1	627213	627452	+
VNG_0829G	NC_002607.1	627445	629958	+
VNG_0830G	NC_002607.1	629955	630743	+
VNG_0831G	NC_002607.1	630743	632050	+
VNG_0832C	NC_002607.1	632047	632625	+
VNG_0834C	NC_002607.1	632698	633588	+
VNG_0835G	NC_002607.1	633600	633962	-
VNG_0835a	NC_002607.1	634311	635075	+
VNG_0835b	NC_002607.1	635084	635296	+
VNG_0836H	NC_002607.1	635667	636047	+
VNG_0837H	NC_002607.1	636822	637199	+
VNG_0838G	NC_002607.1	637192	638265	+
VNG_0841G	NC_002607.1	638908	639591	-
VNG_0845C	NC_002607.1	639672	640481	-
VNG_0846C	NC_002607.1	640617	642092	+
VNG_0847H	NC_002607.1	642117	643022	-
VNG_0849C	NC_002607.1	643071	644420	-
VNG_0851C	NC_002607.1	644507	645343	-
VNG_0852C	NC_002607.1	645426	646076	+
VNG_0853C	NC_002607.1	646085	646483	-
VNG_0854C	NC_002607.1	646591	647625	+
VNG_0857C	NC_002607.1	647674	648294	+
VNG_0858C	NC_002607.1	648285	650081	-
VNG_0860G	NC_002607.1	650181	650465	+
VNG_0862G	NC_002607.1	650472	651293	-
VNG_0861H	NC_002607.1	651366	651836	+
VNG_0863H	NC_002607.1	651889	652026	+
VNG_0864G	NC_002607.1	652034	654136	-
VNG_0865C	NC_002607.1	654252	654935	+
VNG_0867G	NC_002607.1	654935	656017	+
VNG_0868H	NC_002607.1	656033	656506	-
VNG_0869G	NC_002607.1	656539	657525	-
VNG_0870G	NC_002607.1	657686	657961	+
VNG_0872G	NC_002607.1	657961	659232	+
VNG_0873G	NC_002607.1	659240	659707	-
VNG_0874G	NC_002607.1	659810	661324	+
VNG_0875C	NC_002607.1	661321	661929	+
VNG_0876G	NC_002607.1	661987	662982	+
VNG_0878G	NC_002607.1	663068	663607	-
VNG_0879C	NC_002607.1	663648	664013	-
VNG_0880G	NC_002607.1	664248	664979	+
VNG_0881G	NC_002607.1	665121	666806	+
VNG_0882G	NC_002607.1	666861	667634	+
VNG_0883H	NC_002607.1	667700	668494	+
VNG_0884G	NC_002607.1	668445	669545	-
VNG_0885G	NC_002607.1	669542	671956	-
VNG_0887G	NC_002607.1	672176	674011	+
VNG_0889G	NC_002607.1	674013	676487	+
VNG_0890G	NC_002607.1	676676	677209	+
VNG_0891G	NC_002607.1	677255	678424	+
VNG_0892H	NC_002607.1	678467	678622	+
VNG_0892a	NC_002607.1	678619	679143	+
VNG_0893G	NC_002607.1	679140	679961	-
VNG_0896G	NC_002607.1	680015	680419	-
VNG_0897G	NC_002607.1	680470	681555	-
VNG_0898G	NC_002607.1	681548	682771	-
VNG_0901G	NC_002607.1	682768	684288	-
VNG_0903C	NC_002607.1	684313	685362	-
VNG_0905G	NC_002607.1	685465	686847	-
VNG_0906H	NC_002607.1	686893	687372	-
VNG_0907H	NC_002607.1	687546	687692	+
VNG_0908G	NC_002607.1	687685	689355	+
VNG_0909H	NC_002607.1	689345	689866	+
VNG_0911H	NC_002607.1	689936	690208	+
VNG_0913H	NC_002607.1	690192	691643	+
VNG_0914H	NC_002607.1	691613	692713	-
VNG_0915G	NC_002607.1	692827	694062	+
VNG_0916G	NC_002607.1	694068	696365	-
VNG_0917G	NC_002607.1	696355	696969	-
VNG_0918H	NC_002607.1	697055	697939	-
VNG_0919G	NC_002607.1	698097	698786	+
VNG_0920H	NC_002607.1	698755	700821	-
VNG_0921G	NC_002607.1	700821	701954	-
VNG_0923G	NC_002607.1	701947	703560	-
VNG_0924G	NC_002607.1	703563	704714	-
VNG_0925C	NC_002607.1	704811	705959	-
VNG_0926H	NC_002607.1	705811	705990	+
VNG_0927C	NC_002607.1	706028	706747	-
VNG_0928G	NC_002607.1	706744	708279	-
VNG_0930G	NC_002607.1	708396	709412	+
VNG_0931G	NC_002607.1	709490	710641	+
VNG_0932C	NC_002607.1	710638	711030	+
VNG_0933G	NC_002607.1	711047	712147	-
VNG_0934H	NC_002607.1	712274	712447	-
VNG_0935G	NC_002607.1	712502	713143	-
VNG_0936C	NC_002607.1	713283	714068	-
VNG_0937G	NC_002607.1	714164	715606	+
VNG_0938G	NC_002607.1	715619	716419	-
VNG_0940G	NC_002607.1	716669	718771	+
VNG_0941C	NC_002607.1	718768	719832	+
VNG_0942G	NC_002607.1	719845	720243	-
VNG_0943C	NC_002607.1	720331	720678	+
VNG_0945H	NC_002607.1	720747	721028	+
VNG_0946G	NC_002607.1	721030	722001	-
VNG_0947G	NC_002607.1	722046	723791	-
VNG_0949G	NC_002607.1	723798	725687	-
VNG_0950G	NC_002607.1	725699	726469	-
VNG_0950a	NC_002607.1	726466	726921	-
VNG_0953C	NC_002607.1	726922	727359	-
VNG_0954C	NC_002607.1	727343	728857	-
VNG_0955G	NC_002607.1	728962	729432	-
VNG_0958G	NC_002607.1	729429	731339	-
VNG_0959H	NC_002607.1	731395	731634	-
VNG_0960G	NC_002607.1	731799	732380	+
VNG_0961G	NC_002607.1	732392	732982	+
VNG_0962G	NC_002607.1	732994	733575	+
VNG_0963G	NC_002607.1	733645	734865	+
VNG_0964C	NC_002607.1	735009	735881	+
VNG_0965C	NC_002607.1	735910	736773	-
VNG_0966G	NC_002607.1	736840	737646	-
VNG_0967G	NC_002607.1	737643	738110	-
VNG_0969H	NC_002607.1	738107	739246	-
VNG_0970G	NC_002607.1	739248	739835	-
VNG_0971G	NC_002607.1	739838	741844	-
VNG_0973G	NC_002607.1	741846	742889	-
VNG_0974G	NC_002607.1	742886	743248	-
VNG_0976G	NC_002607.1	743295	743831	-
VNG_0978H	NC_002607.1	743896	744489	-
VNG_0979H	NC_002607.1	744606	745511	+
VNG_0981C	NC_002607.1	745648	746763	+
VNG_0982C	NC_002607.1	746843	747133	+
VNG_0983C	NC_002607.1	747151	748605	-
VNG_t14	NC_002607.1	748778	748851	+
VNG_0985H	NC_002607.1	749392	751398	+
VNG_0985a	NC_002607.1	751903	752106	-
VNG_0986H	NC_002607.1	752276	752803	+
VNG_0987H	NC_002607.1	753131	753547	+
VNG_0987a	NC_002607.1	753767	754021	+
VNG_0988H	NC_002607.1	754014	754391	+
VNG_0989C	NC_002607.1	754459	755481	-
VNG_0990H	NC_002607.1	756010	756183	+
VNG_0991H	NC_002607.1	756675	757016	-
VNG_0992H	NC_002607.1	757409	758119	-
VNG_0993H	NC_002607.1	758465	759277	+
VNG_0994H	NC_002607.1	759667	759870	-
VNG_0994b	NC_002607.1	760234	760371	+
VNG_0995H	NC_002607.1	760365	760553	+
VNG_0996G	NC_002607.1	760682	762487	+
VNG_0997G	NC_002607.1	762609	764612	+
VNG_0998G	NC_002607.1	764619	765629	-
VNG_0999H	NC_002607.1	765775	766044	-
VNG_0999a	NC_002607.1	766395	766595	+
VNG_1000H	NC_002607.1	766603	766812	+
VNG_1001G	NC_002607.1	766955	768454	-
VNG_1002H	NC_002607.1	768965	769882	+
VNG_1003H	NC_002607.1	769965	770189	+
VNG_1005H	NC_002607.1	770194	770406	-
VNG_t15	NC_002607.1	770516	770691	+
VNG_1006H	NC_002607.1	770827	771546	+
VNG_1007H	NC_002607.1	771722	771925	-
VNG_1007a	NC_002607.1	772212	772763	-
VNG_1008G	NC_002607.1	773360	773950	+
VNG_1009G	NC_002607.1	773962	774546	+
VNG_1011C	NC_002607.1	774736	775503	+
VNG_1012H	NC_002607.1	775560	775805	+
VNG_1013G	NC_002607.1	775802	777073	-
VNG_1014G	NC_002607.1	777218	778453	+
VNG_1015H	NC_002607.1	778446	778820	-
VNG_1017H	NC_002607.1	778857	779960	-
VNG_1018G	NC_002607.1	780051	782048	+
VNG_1020C	NC_002607.1	782045	782896	+
VNG_1021C	NC_002607.1	782934	783695	+
VNG_1023C	NC_002607.1	783700	784716	+
VNG_1024C	NC_002607.1	784713	785120	+
VNG_1025H	NC_002607.1	785117	785962	+
VNG_1026H	NC_002607.1	785972	786526	+
VNG_1027G	NC_002607.1	786530	787174	-
VNG_1029C	NC_002607.1	787221	787760	-
VNG_1030G	NC_002607.1	787803	788402	-
VNG_1031C	NC_002607.1	788399	788908	-
VNG_1033G	NC_002607.1	788905	790005	-
VNG_1034H	NC_002607.1	790103	790531	+
VNG_1035C	NC_002607.1	790599	792188	-
VNG_1036H	NC_002607.1	792185	792703	-
VNG_1037G	NC_002607.1	792760	793503	-
VNG_1038C	NC_002607.1	793607	794329	+
VNG_1039H	NC_002607.1	794483	795025	+
VNG_1041H	NC_002607.1	795133	795747	-
VNG_1041a	NC_002607.1	795292	795687	+
VNG_1042H	NC_002607.1	795777	796229	+
VNG_1047H	NC_002607.1	796243	796389	-
VNG_1046H	NC_002607.1	796466	796759	+
VNG_1048G	NC_002607.1	796773	798053	-
VNG_1050H	NC_002607.1	798126	798476	-
VNG_1052H	NC_002607.1	798683	799369	+
VNG_1053G	NC_002607.1	799383	800300	-
VNG_1054G	NC_002607.1	800415	801842	+
VNG_1055G	NC_002607.1	801935	802657	+
VNG_1056C	NC_002607.1	802721	803701	+
VNG_1057C	NC_002607.1	803726	805084	-
VNG_1058H	NC_002607.1	805308	806426	+
VNG_1059C	NC_002607.1	806499	807695	-
VNG_1060H	NC_002607.1	807925	808710	+
VNG_1062G	NC_002607.1	808831	809730	+
VNG_1063H	NC_002607.1	809745	810761	-
VNG_1064H	NC_002607.1	811152	812492	-
VNG_1065C	NC_002607.1	812621	813382	+
VNG_1066C	NC_002607.1	813372	814280	+
VNG_1067G	NC_002607.1	814270	815208	-
VNG_1068G	NC_002607.1	815317	818580	+
VNG_1069C	NC_002607.1	818583	819524	+
VNG_1070G	NC_002607.1	819545	820756	-
VNG_1071G	NC_002607.1	820841	821197	-
VNG_1073G	NC_002607.1	821245	822726	-
VNG_1074G	NC_002607.1	822719	823714	-
VNG_1075G	NC_002607.1	823711	824646	-
VNG_1077G	NC_002607.1	824703	826337	-
VNG_1079G	NC_002607.1	826509	827423	-
VNG_1081G	NC_002607.1	827496	829250	-
VNG_1083G	NC_002607.1	829247	830572	-
VNG_1084G	NC_002607.1	830618	831214	-
VNG_1085H	NC_002607.1	831377	831595	+
VNG_1086C	NC_002607.1	831651	831929	+
VNG_1087C	NC_002607.1	832010	833953	+
VNG_1088C	NC_002607.1	833972	834274	-
VNG_1089G	NC_002607.1	834481	835803	+
VNG_1090H	NC_002607.1	835854	836057	+
VNG_1090a	NC_002607.1	836099	836659	+
VNG_1092C	NC_002607.1	836666	837766	-
VNG_1093C	NC_002607.1	837766	838644	-
VNG_1094H	NC_002607.1	838735	839919	+
VNG_1095H	NC_002607.1	839927	840226	-
VNG_1096H	NC_002607.1	840223	840567	-
VNG_1097G	NC_002607.1	840757	842241	+
VNG_1099C	NC_002607.1	842300	843136	+
VNG_1100C	NC_002607.1	843129	843680	+
VNG_1101C	NC_002607.1	843690	844934	-
VNG_1103G	NC_002607.1	845055	845399	-
VNG_1104G	NC_002607.1	845405	846463	-
VNG_1105G	NC_002607.1	846465	847103	-
VNG_1108G	NC_002607.1	847304	847795	-
VNG_1110C	NC_002607.1	847866	848072	-
VNG_1111G	NC_002607.1	848173	849285	+
VNG_1112H	NC_002607.1	849289	849699	+
VNG_1114G	NC_002607.1	849749	850534	+
VNG_1115H	NC_002607.1	850650	851024	+
VNG_1118G	NC_002607.1	851026	851808	-
VNG_1117C	NC_002607.1	851896	852879	+
VNG_t16	NC_002607.1	852957	853028	+
VNG_1119H	NC_002607.1	853141	853365	+
VNG_1120H	NC_002607.1	853418	853894	-
VNG_1121G	NC_002607.1	854013	855161	+
VNG_1123G	NC_002607.1	855154	855582	-
VNG_1125G	NC_002607.1	855719	856657	-
VNG_1128G	NC_002607.1	856660	858546	-
VNG_1130H	NC_002607.1	858687	858911	-
VNG_1131G	NC_002607.1	858908	859939	-
VNG_t17	NC_002607.1	860171	860253	+
VNG_1132G	NC_002607.1	860275	860790	+
VNG_1133G	NC_002607.1	860790	861302	+
VNG_1134G	NC_002607.1	861309	861692	+
VNG_1136G	NC_002607.1	861696	862442	+
VNG_t18	NC_002607.1	862573	862657	+
VNG_1137G	NC_002607.1	862694	863047	+
VNG_1138G	NC_002607.1	863044	863481	+
VNG_1139G	NC_002607.1	863475	863873	+
VNG_1140G	NC_002607.1	863886	864086	+
VNG_1141G	NC_002607.1	864089	864271	+
VNG_1142G	NC_002607.1	864273	865469	+
VNG_1143G	NC_002607.1	865466	866215	+
VNG_1144H	NC_002607.1	866282	867097	-
VNG_1145G	NC_002607.1	867210	868202	+
VNG_1148G	NC_002607.1	868199	868936	+
VNG_1149C	NC_002607.1	869155	870501	+
VNG_1150G	NC_002607.1	870501	871544	+
VNG_1151H	NC_002607.1	871623	871844	+
VNG_1153G	NC_002607.1	871960	873720	+
VNG_1154H	NC_002607.1	873734	874207	-
VNG_1156G	NC_002607.1	874233	876464	-
VNG_1157G	NC_002607.1	876667	877029	+
VNG_1158G	NC_002607.1	877036	877260	+
VNG_1159G	NC_002607.1	877260	877448	+
VNG_1160G	NC_002607.1	877445	877930	+
VNG_1162H	NC_002607.1	877978	878925	-
VNG_1163G	NC_002607.1	878982	879557	-
VNG_1164C	NC_002607.1	879550	880626	-
VNG_1165G	NC_002607.1	880623	881471	-
VNG_1168C	NC_002607.1	881509	882102	-
VNG_1169C	NC_002607.1	882144	882503	-
VNG_1170G	NC_002607.1	882503	882802	-
VNG_1170a	NC_002607.1	882933	883085	-
VNG_1172G	NC_002607.1	883195	884376	+
VNG_1173G	NC_002607.1	884446	884712	-
VNG_1173a	NC_002607.1	884715	884888	-
VNG_1175G	NC_002607.1	884967	886793	-
VNG_1174G	NC_002607.1	886911	887744	+
VNG_1176G	NC_002607.1	887741	888373	+
VNG_1178H	NC_002607.1	888387	888617	-
VNG_1179C	NC_002607.1	888617	889207	-
VNG_1180G	NC_002607.1	889326	889859	+
VNG_1181G	NC_002607.1	889903	890526	+
VNG_1182H	NC_002607.1	890603	891091	+
VNG_1184G	NC_002607.1	891125	892330	-
VNG_1183H	NC_002607.1	892327	892578	-
VNG_1185G	NC_002607.1	892721	893791	+
VNG_1187G	NC_002607.1	893923	895062	+
VNG_1188G	NC_002607.1	895069	895686	+
VNG_1189H	NC_002607.1	895707	896162	-
VNG_1190G	NC_002607.1	896255	896857	-
VNG_1191G	NC_002607.1	896996	898141	+
VNG_1193C	NC_002607.1	898154	899398	-
VNG_1194H	NC_002607.1	899522	899731	-
VNG_1196H	NC_002607.1	899768	900121	-
VNG_1197G	NC_002607.1	900160	900624	-
VNG_1198C	NC_002607.1	900703	902079	-
VNG_1200H	NC_002607.1	902216	902422	+
VNG_1201G	NC_002607.1	902438	903073	-
VNG_1202C	NC_002607.1	903076	903774	-
VNG_1204G	NC_002607.1	903818	905068	-
VNG_1205C	NC_002607.1	905173	906468	-
VNG_1205a	NC_002607.1	906534	906974	-
VNG_1207C	NC_002607.1	907027	907659	-
VNG_1208G	NC_002607.1	907743	909509	+
VNG_1209G	NC_002607.1	909509	910429	+
VNG_1211G	NC_002607.1	910426	911679	+
VNG_1212G	NC_002607.1	911676	913253	+
VNG_1213C	NC_002607.1	913569	914321	+
VNG_1214H	NC_002607.1	914979	916109	+
VNG_t19	NC_002607.1	916308	916381	-
VNG_1215G	NC_002607.1	916393	916875	-
VNG_1216G	NC_002607.1	916872	918068	-
VNG_1218C	NC_002607.1	918171	918779	-
VNG_1219G	NC_002607.1	918919	919596	+
VNG_1220H	NC_002607.1	919654	919977	-
VNG_t20	NC_002607.1	920276	920358	-
VNG_1224G	NC_002607.1	920669	921862	+
VNG_1227H	NC_002607.1	922015	922776	-
VNG_1226H	NC_002607.1	922865	923065	+
VNG_1228C	NC_002607.1	923079	923711	-
VNG_1229H	NC_002607.1	923886	924092	+
VNG_1230G	NC_002607.1	924127	925311	-
VNG_1232G	NC_002607.1	925560	926852	-
VNG_1233G	NC_002607.1	926974	928149	+
VNG_1234C	NC_002607.1	928165	929535	-
VNG_1235C	NC_002607.1	929643	930380	+
VNG_1236C	NC_002607.1	930370	931761	+
VNG_1237C	NC_002607.1	931821	932303	+
VNG_1239H	NC_002607.1	932347	932466	-
VNG_1238C	NC_002607.1	932411	932875	+
VNG_1240G	NC_002607.1	932862	935048	+
VNG_1241G	NC_002607.1	935124	935900	+
VNG_1244C	NC_002607.1	936143	936409	-
VNG_1245C	NC_002607.1	936406	937260	-
VNG_1246H	NC_002607.1	937348	937776	+
VNG_1246a	NC_002607.1	937777	937911	-
VNG_1247G	NC_002607.1	937934	938593	-
VNG_1249C	NC_002607.1	938596	939666	-
VNG_1250H	NC_002607.1	939667	940758	-
VNG_1251G	NC_002607.1	940842	943682	-
VNG_1252G	NC_002607.1	943743	944486	-
VNG_1253C	NC_002607.1	944486	945883	-
VNG_1255C	NC_002607.1	945880	947151	-
VNG_1256G	NC_002607.1	947257	947919	+
VNG_1257H	NC_002607.1	947927	948211	-
VNG_1259G	NC_002607.1	948260	949348	-
VNG_1260C	NC_002607.1	949462	949746	+
VNG_1261H	NC_002607.1	949891	950073	+
VNG_1262G	NC_002607.1	950078	950476	-
VNG_1263C	NC_002607.1	950618	950860	+
VNG_1264C	NC_002607.1	950936	951319	-
VNG_1266G	NC_002607.1	951404	952309	+
VNG_1268H	NC_002607.1	952374	953267	+
VNG_1270H	NC_002607.1	953515	954315	-
VNG_1271H	NC_002607.1	954755	955255	+
VNG_1272C	NC_002607.1	955446	956882	+
VNG_1273G	NC_002607.1	956875	957366	+
VNG_1275G	NC_002607.1	957376	958683	-
VNG_1276C	NC_002607.1	958732	959457	-
VNG_1279H	NC_002607.1	959518	960012	-
VNG_1280C	NC_002607.1	960009	960611	-
VNG_1281H	NC_002607.1	960595	961293	-
VNG_1282G	NC_002607.1	961406	962074	-
VNG_1283H	NC_002607.1	962119	962319	-
VNG_1284G	NC_002607.1	962319	963932	-
VNG_1285G	NC_002607.1	964009	964770	-
VNG_1287C	NC_002607.1	964835	965257	-
VNG_1289H	NC_002607.1	965294	965509	-
VNG_1291H	NC_002607.1	965562	966389	-
VNG_1292H	NC_002607.1	966430	966543	-
VNG_1294G	NC_002607.1	966623	967534	-
VNG_1295H	NC_002607.1	967595	967786	-
VNG_1296C	NC_002607.1	967899	968510	+
VNG_1297C	NC_002607.1	968577	969803	+
VNG_1299C	NC_002607.1	969880	971058	+
VNG_1300H	NC_002607.1	971055	971507	+
VNG_1301G	NC_002607.1	971521	972504	-
VNG_1302H	NC_002607.1	972618	972983	+
VNG_1303C	NC_002607.1	972973	975138	-
VNG_1305G	NC_002607.1	975273	976565	+
VNG_1306G	NC_002607.1	976559	978406	-
VNG_1308G	NC_002607.1	978413	979291	-
VNG_1309G	NC_002607.1	979298	979660	-
VNG_1310G	NC_002607.1	979662	980054	-
VNG_1311G	NC_002607.1	980201	980776	-
VNG_1313G	NC_002607.1	980918	982897	+
VNG_t21	NC_002607.1	982991	983065	+
VNG_1314H	NC_002607.1	983197	983418	+
VNG_1315H	NC_002607.1	983405	983818	+
VNG_1317H	NC_002607.1	983914	984111	-
VNG_1318H	NC_002607.1	984156	984569	+
VNG_1319H	NC_002607.1	984584	986269	-
VNG_1320G	NC_002607.1	986387	987505	+
VNG_1323C	NC_002607.1	987502	989949	+
VNG_1324C	NC_002607.1	989961	990395	-
VNG_t22	NC_002607.1	990773	990847	-
VNG_1325C	NC_002607.1	990944	991687	-
VNG_1326H	NC_002607.1	991773	992111	+
VNG_1327G	NC_002607.1	992165	992743	+
VNG_1329H	NC_002607.1	992751	993020	-
VNG_1330H	NC_002607.1	993108	993569	+
VNG_1332G	NC_002607.1	993598	994200	-
VNG_1335G	NC_002607.1	994265	995710	-
VNG_1336C	NC_002607.1	995751	996206	-
VNG_1337C	NC_002607.1	996308	997666	+
VNG_1339C	NC_002607.1	997742	999307	+
VNG_1340C	NC_002607.1	999323	1000123	-
VNG_1341G	NC_002607.1	1000227	1000994	+
VNG_1342G	NC_002607.1	1000991	1002007	+
VNG_1343C	NC_002607.1	1002024	1002701	-
VNG_1344G	NC_002607.1	1002833	1003951	-
VNG_1345H	NC_002607.1	1004042	1004611	+
VNG_1347C	NC_002607.1	1004604	1005329	+
VNG_1349C	NC_002607.1	1005333	1005794	-
VNG_1350C	NC_002607.1	1005848	1006789	-
VNG_1351G	NC_002607.1	1006932	1007417	+
VNG_1352G	NC_002607.1	1007425	1009293	-
VNG_1353C	NC_002607.1	1009330	1010874	-
VNG_1355H	NC_002607.1	1010871	1011350	-
VNG_1356G	NC_002607.1	1011395	1012807	-
VNG_1357C	NC_002607.1	1013011	1013259	-
VNG_1359G	NC_002607.1	1013308	1014291	-
VNG_1360H	NC_002607.1	1014340	1014921	-
VNG_1362H	NC_002607.1	1015011	1015412	+
VNG_1364G	NC_002607.1	1015496	1016482	+
VNG_1365C	NC_002607.1	1016483	1017439	-
VNG_1366H	NC_002607.1	1017495	1017722	-
VNG_1367G	NC_002607.1	1017722	1018000	-
VNG_1369G	NC_002607.1	1018040	1019149	-
VNG_1370G	NC_002607.1	1019209	1020318	+
VNG_1371G	NC_002607.1	1020315	1021511	+
VNG_1372C	NC_002607.1	1021561	1022991	+
VNG_1374G	NC_002607.1	1023071	1024891	+
VNG_1375C	NC_002607.1	1024894	1026540	+
VNG_1376H	NC_002607.1	1026595	1026759	-
VNG_1377G	NC_002607.1	1026961	1027410	-
VNG_1379G	NC_002607.1	1027447	1028247	-
VNG_t23	NC_002607.1	1028396	1028480	-
VNG_1380H	NC_002607.1	1028586	1029209	+
VNG_1381H	NC_002607.1	1029250	1030257	+
VNG_1382H	NC_002607.1	1030300	1030734	+
VNG_1383G	NC_002607.1	1030786	1033188	+
VNG_1384H	NC_002607.1	1033228	1033419	+
VNG_1385G	NC_002607.1	1033416	1033934	+
VNG_1387H	NC_002607.1	1033931	1034509	-
VNG_1388H	NC_002607.1	1034506	1035285	-
VNG_1389C	NC_002607.1	1035287	1036099	-
VNG_t24	NC_002607.1	1036227	1036310	-
VNG_1390H	NC_002607.1	1036408	1036719	+
VNG_1390a	NC_002607.1	1036721	1037209	-
VNG_1394H	NC_002607.1	1037249	1037746	-
VNG_1395G	NC_002607.1	1037808	1039253	-
VNG_1397C	NC_002607.1	1039323	1040405	-
VNG_1398C	NC_002607.1	1040466	1040909	-
VNG_1402H	NC_002607.1	1040976	1041458	-
VNG_1401C	NC_002607.1	1041502	1041948	-
VNG_1403H	NC_002607.1	1041974	1042369	-
VNG_1405C	NC_002607.1	1042533	1042907	-
VNG_1404G	NC_002607.1	1043067	1043468	+
VNG_1404a	NC_002607.1	1043476	1043619	-
VNG_1406G	NC_002607.1	1043752	1045554	+
VNG_1407C	NC_002607.1	1045627	1046025	+
VNG_1408G	NC_002607.1	1046073	1048121	-
VNG_1409C	NC_002607.1	1048271	1049413	+
VNG_1410H	NC_002607.1	1049424	1051145	-
VNG_1412H	NC_002607.1	1051252	1052070	-
VNG_1413H	NC_002607.1	1052148	1053863	-
VNG_1414G	NC_002607.1	1053977	1055224	+
VNG_1416G	NC_002607.1	1055397	1056290	+
VNG_1417H	NC_002607.1	1056325	1057029	-
VNG_1418C	NC_002607.1	1057123	1058421	+
VNG_1420H	NC_002607.1	1058589	1059044	+
VNG_1422H	NC_002607.1	1059075	1059986	+
VNG_1423H	NC_002607.1	1060045	1060191	+
VNG_1425H	NC_002607.1	1060402	1060698	-
VNG_1426H	NC_002607.1	1060839	1061117	+
VNG_1427H	NC_002607.1	1061121	1061363	+
VNG_1428G	NC_002607.1	1061360	1062508	-
VNG_1429C	NC_002607.1	1062600	1063610	+
VNG_1431C	NC_002607.1	1063612	1064343	+
VNG_1432G	NC_002607.1	1064474	1065466	+
VNG_1433G	NC_002607.1	1065552	1065731	+
VNG_1435G	NC_002607.1	1065778	1066809	+
VNG_1437G	NC_002607.1	1067076	1068023	-
VNG_1438H	NC_002607.1	1068124	1068375	+
VNG_1438a	NC_002607.1	1068448	1068648	+
VNG_1440H	NC_002607.1	1068714	1069064	-
VNG_1442G	NC_002607.1	1069113	1070405	-
VNG_1444G	NC_002607.1	1070493	1071770	+
VNG_1446H	NC_002607.1	1071909	1072115	-
VNG_1447H	NC_002607.1	1072166	1073080	-
VNG_1448H	NC_002607.1	1073153	1073392	-
VNG_1450G	NC_002607.1	1073484	1074833	+
VNG_1451C	NC_002607.1	1074902	1075960	+
VNG_1452G	NC_002607.1	1075969	1076835	-
VNG_1453H	NC_002607.1	1076928	1077320	+
VNG_1454C	NC_002607.1	1077321	1078823	-
VNG_1455H	NC_002607.1	1078862	1079908	-
VNG_1456H	NC_002607.1	1079946	1080419	-
VNG_1457C	NC_002607.1	1080550	1081038	+
VNG_1458G	NC_002607.1	1081040	1082008	-
VNG_1459H	NC_002607.1	1082119	1082487	-
VNG_1461H	NC_002607.1	1082555	1082767	-
VNG_1462G	NC_002607.1	1082767	1084842	-
VNG_1463G	NC_002607.1	1085033	1085461	+
VNG_1464G	NC_002607.1	1085495	1087519	-
VNG_1465G	NC_002607.1	1087516	1088595	-
VNG_1466H	NC_002607.1	1088696	1088878	+
VNG_1466a	NC_002607.1	1088884	1089051	+
VNG_1467G	NC_002607.1	1089122	1089910	+
VNG_1468H	NC_002607.1	1089962	1090231	+
VNG_1470G	NC_002607.1	1090461	1091636	+
VNG_1471C	NC_002607.1	1091633	1092457	+
VNG_1472G	NC_002607.1	1092551	1094830	-
VNG_1473H	NC_002607.1	1094827	1095075	-
VNG_1474G	NC_002607.1	1095217	1096014	+
VNG_1475C	NC_002607.1	1096286	1097941	+
VNG_1476C	NC_002607.1	1097962	1100202	+
VNG_1478G	NC_002607.1	1100204	1101028	-
VNG_1479H	NC_002607.1	1101118	1101351	+
VNG_1480C	NC_002607.1	1101355	1101873	-
VNG_1481G	NC_002607.1	1102027	1102542	+
VNG_1482G	NC_002607.1	1102552	1103676	-
VNG_1483C	NC_002607.1	1103741	1104244	-
VNG_1484H	NC_002607.1	1104331	1105599	+
VNG_1486H	NC_002607.1	1105679	1105840	+
VNG_1486a	NC_002607.1	1105831	1105932	+
VNG_1487H	NC_002607.1	1105936	1106394	+
VNG_1488G	NC_002607.1	1106448	1107095	+
VNG_1490H	NC_002607.1	1107155	1107559	+
VNG_t25	NC_002607.1	1107729	1107813	-
VNG_1492C	NC_002607.1	1107937	1108500	+
VNG_1493G	NC_002607.1	1108559	1110031	-
VNG_1494G	NC_002607.1	1110237	1110413	-
VNG_1496G	NC_002607.1	1110410	1110592	-
VNG_1498G	NC_002607.1	1110649	1111710	-
VNG_1498a	NC_002607.1	1111795	1112016	+
VNG_1497C	NC_002607.1	1112065	1113018	+
VNG_1500H	NC_002607.1	1113019	1113573	-
VNG_1501G	NC_002607.1	1113674	1116310	+
VNG_1503C	NC_002607.1	1116360	1117103	+
VNG_1505G	NC_002607.1	1117100	1118569	-
VNG_1506G	NC_002607.1	1118630	1119703	-
VNG_1508C	NC_002607.1	1119763	1121874	-
VNG_1510C	NC_002607.1	1121952	1123601	-
VNG_1511C	NC_002607.1	1123649	1125697	-
VNG_1513H	NC_002607.1	1125749	1126012	-
VNG_1514H	NC_002607.1	1126036	1126644	-
VNG_1515G	NC_002607.1	1126648	1127235	-
VNG_1518H	NC_002607.1	1127342	1127782	+
VNG_1519H	NC_002607.1	1127799	1128008	-
VNG_1520G	NC_002607.1	1128085	1129023	-
VNG_1520a	NC_002607.1	1129120	1129443	+
VNG_1523G	NC_002607.1	1129509	1131440	+
VNG_1524C	NC_002607.1	1131444	1132820	-
VNG_1525C	NC_002607.1	1132953	1134257	-
VNG_1526G	NC_002607.1	1134520	1135863	+
VNG_1528G	NC_002607.1	1136003	1137436	+
VNG_1529G	NC_002607.1	1137505	1139055	+
VNG_1530H	NC_002607.1	1139055	1139312	+
VNG_1532G	NC_002607.1	1139423	1141255	+
VNG_1533H	NC_002607.1	1141390	1143534	+
VNG_1534H	NC_002607.1	1143583	1143726	-
VNG_1534a	NC_002607.1	1143893	1144840	+
VNG_1536C	NC_002607.1	1144847	1145290	-
VNG_1537C	NC_002607.1	1145342	1146571	-
VNG_1538H	NC_002607.1	1146674	1147519	+
VNG_1540G	NC_002607.1	1147554	1148264	-
VNG_1541G	NC_002607.1	1148382	1149530	+
VNG_1542G	NC_002607.1	1149527	1150396	+
VNG_1543G	NC_002607.1	1150451	1151497	+
VNG_1544G	NC_002607.1	1151507	1153885	-
VNG_t26	NC_002607.1	1154022	1154096	-
VNG_1547C	NC_002607.1	1154318	1154860	-
VNG_1546H	NC_002607.1	1154857	1155096	-
VNG_1546a	NC_002607.1	1155148	1155867	-
VNG_1548C	NC_002607.1	1155952	1156764	-
VNG_1550G	NC_002607.1	1156903	1157466	+
VNG_1551G	NC_002607.1	1157463	1158167	+
VNG_1553G	NC_002607.1	1158160	1159026	+
VNG_1554G	NC_002607.1	1159023	1160000	+
VNG_1555G	NC_002607.1	1159997	1160827	+
VNG_1557G	NC_002607.1	1160827	1161834	+
VNG_1558H	NC_002607.1	1161834	1162082	+
VNG_1559H	NC_002607.1	1162079	1162777	+
VNG_1561C	NC_002607.1	1162774	1163997	+
VNG_1562H	NC_002607.1	1163994	1164365	+
VNG_1564H	NC_002607.1	1164343	1165566	+
VNG_1565G	NC_002607.1	1165595	1167667	-
VNG_1566G	NC_002607.1	1167702	1171601	+
VNG_1567G	NC_002607.1	1171591	1172304	+
VNG_1568G	NC_002607.1	1172301	1173053	+
VNG_1570H	NC_002607.1	1173050	1173820	-
VNG_1572C	NC_002607.1	1173965	1174966	+
VNG_1573G	NC_002607.1	1174980	1176278	+
VNG_1574G	NC_002607.1	1176275	1176952	+
VNG_1576G	NC_002607.1	1176954	1178492	+
VNG_1577C	NC_002607.1	1178531	1179148	+
VNG_1578H	NC_002607.1	1179145	1180071	+
VNG_1580H	NC_002607.1	1180068	1180811	+
VNG_1581C	NC_002607.1	1180814	1181380	+
VNG_1582G	NC_002607.1	1181398	1182408	+
VNG_1583C	NC_002607.1	1182401	1183096	+
VNG_1587H	NC_002607.1	1184767	1185759	+
VNG_1587b	NC_002607.1	1186647	1187813	-
VNG_1589C	NC_002607.1	1188524	1188937	+
VNG_1591H	NC_002607.1	1189961	1190134	+
VNG_1592G	NC_002607.1	1190152	1190961	-
VNG_1595C	NC_002607.1	1190958	1191887	-
VNG_1598H	NC_002607.1	1191884	1192099	-
VNG_1598a	NC_002607.1	1191948	1192379	+
VNG_1601G	NC_002607.1	1192390	1193811	-
VNG_1603G	NC_002607.1	1193811	1195136	-
VNG_1605G	NC_002607.1	1195419	1195793	-
VNG_1606G	NC_002607.1	1195790	1196881	-
VNG_1607G	NC_002607.1	1197028	1197618	-
VNG_1608C	NC_002607.1	1197741	1198199	+
VNG_1609C	NC_002607.1	1198223	1198930	-
VNG_1610C	NC_002607.1	1199058	1199903	+
VNG_1611C	NC_002607.1	1199977	1200564	+
VNG_1613H	NC_002607.1	1200614	1202614	+
VNG_1615G	NC_002607.1	1202684	1204021	+
VNG_1618H	NC_002607.1	1204023	1204607	-
VNG_1616C	NC_002607.1	1204670	1205383	-
VNG_1617H	NC_002607.1	1205478	1205966	+
VNG_1619H	NC_002607.1	1205963	1206535	-
VNG_1621H	NC_002607.1	1206584	1207039	-
VNG_1622G	NC_002607.1	1207128	1208543	+
VNG_1623G	NC_002607.1	1208540	1209373	-
VNG_1624G	NC_002607.1	1209504	1211756	+
VNG_1625H	NC_002607.1	1211764	1212387	-
VNG_1626C	NC_002607.1	1212506	1213414	+
VNG_1628G	NC_002607.1	1213427	1214401	-
VNG_1630H	NC_002607.1	1214457	1214690	-
VNG_1631G	NC_002607.1	1214890	1215618	-
VNG_1632G	NC_002607.1	1215673	1216401	-
VNG_1634G	NC_002607.1	1216405	1216695	-
VNG_1635G	NC_002607.1	1216692	1217354	-
VNG_1637G	NC_002607.1	1217584	1218441	+
VNG_t27	NC_002607.1	1218509	1218666	-
VNG_1638H	NC_002607.1	1218759	1219889	+
VNG_1640H	NC_002607.1	1219873	1220253	-
VNG_1641H	NC_002607.1	1220349	1220975	+
VNG_1642H	NC_002607.1	1220972	1221094	-
VNG_1644G	NC_002607.1	1221158	1224313	-
VNG_1645H	NC_002607.1	1224647	1224832	+
VNG_1646G	NC_002607.1	1224838	1225434	-
VNG_1647G	NC_002607.1	1225431	1227014	-
VNG_1648G	NC_002607.1	1227011	1227667	-
VNG_1649G	NC_002607.1	1227664	1228674	-
VNG_t28	NC_002607.1	1228868	1228942	+
VNG_1649a	NC_002607.1	1228999	1229220	-
VNG_1650H	NC_002607.1	1229492	1230340	-
VNG_1651H	NC_002607.1	1230496	1230699	-
VNG_1653H	NC_002607.1	1231161	1232435	+
VNG_1654G	NC_002607.1	1232639	1233823	-
VNG_1655H	NC_002607.1	1234475	1234831	-
VNG_1657H	NC_002607.1	1234828	1235829	-
VNG_1656H	NC_002607.1	1235959	1236402	+
VNG_1658C	NC_002607.1	1236404	1236835	-
VNG_1659G	NC_002607.1	1237084	1238694	+
VNG_1660G	NC_002607.1	1238694	1239413	+
VNG_1663C	NC_002607.1	1239515	1240657	+
VNG_1664H	NC_002607.1	1240710	1240901	+
VNG_1665G	NC_002607.1	1240909	1241619	-
VNG_1666H	NC_002607.1	1241720	1242487	-
VNG_1667G	NC_002607.1	1242669	1244897	+
VNG_1668G	NC_002607.1	1244981	1245355	-
VNG_1670C	NC_002607.1	1245442	1245897	+
VNG_1672H	NC_002607.1	1245887	1246270	+
VNG_1673G	NC_002607.1	1246366	1247169	+
VNG_1674H	NC_002607.1	1247170	1247331	-
VNG_1675H	NC_002607.1	1247408	1247893	+
VNG_1675a	NC_002607.1	1247923	1248534	+
VNG_1676G	NC_002607.1	1248609	1250231	+
VNG_1678H	NC_002607.1	1250266	1250634	+
VNG_1679H	NC_002607.1	1250640	1251131	-
VNG_1680G	NC_002607.1	1251280	1252248	+
VNG_1681C	NC_002607.1	1252256	1253095	-
VNG_1682C	NC_002607.1	1253088	1253915	-
VNG_1684G	NC_002607.1	1253922	1255460	-
VNG_1686G	NC_002607.1	1255507	1256442	-
VNG_1687C	NC_002607.1	1256502	1257755	-
VNG_t29	NC_002607.1	1257859	1257929	-
VNG_1688C	NC_002607.1	1258177	1259028	+
VNG_1689G	NC_002607.1	1259033	1260040	+
VNG_1690G	NC_002607.1	1260044	1260796	+
VNG_1691G	NC_002607.1	1260793	1261047	+
VNG_1692G	NC_002607.1	1261050	1261772	+
VNG_1693G	NC_002607.1	1261776	1262198	+
VNG_1695G	NC_002607.1	1262202	1262672	+
VNG_1697G	NC_002607.1	1262672	1263580	+
VNG_1698G	NC_002607.1	1263580	1263795	+
VNG_1699C	NC_002607.1	1263804	1264175	+
VNG_1700G	NC_002607.1	1264166	1264495	+
VNG_1701G	NC_002607.1	1264495	1264893	+
VNG_1702G	NC_002607.1	1264898	1265254	+
VNG_1703G	NC_002607.1	1265251	1265952	+
VNG_1705G	NC_002607.1	1265949	1266476	+
VNG_1706G	NC_002607.1	1266473	1266631	+
VNG_1707G	NC_002607.1	1266634	1267026	+
VNG_1709G	NC_002607.1	1267030	1267566	+
VNG_1711G	NC_002607.1	1267570	1268289	+
VNG_1713G	NC_002607.1	1268282	1268731	+
VNG_1714G	NC_002607.1	1268731	1269282	+
VNG_1715G	NC_002607.1	1269286	1269924	+
VNG_1716G	NC_002607.1	1269924	1270388	+
VNG_1718G	NC_002607.1	1270394	1270855	+
VNG_1719G	NC_002607.1	1270859	1272334	+
VNG_1720H	NC_002607.1	1272410	1273573	+
VNG_1721G	NC_002607.1	1273771	1275447	-
VNG_1723H	NC_002607.1	1275550	1275960	-
VNG_1724G	NC_002607.1	1276049	1276699	+
VNG_1726G	NC_002607.1	1276763	1277635	+
VNG_1727G	NC_002607.1	1277691	1278269	+
VNG_1729G	NC_002607.1	1278271	1279176	+
VNG_t30	NC_002607.1	1279229	1279299	+
VNG_1732C	NC_002607.1	1279783	1281537	-
VNG_1733G	NC_002607.1	1281743	1283353	-
VNG_1734H	NC_002607.1	1283350	1283685	-
VNG_1735C	NC_002607.1	1283837	1284622	+
VNG_1737H	NC_002607.1	1284679	1285650	+
VNG_1739G	NC_002607.1	1285676	1286515	+
VNG_1740C	NC_002607.1	1286560	1287537	+
VNG_1740a	NC_002607.1	1287534	1287959	+
VNG_1743C	NC_002607.1	1287967	1288281	+
VNG_1744H	NC_002607.1	1288323	1289183	-
VNG_1746C	NC_002607.1	1289265	1289954	+
VNG_1748C	NC_002607.1	1289955	1290629	-
VNG_1749G	NC_002607.1	1290751	1291941	+
VNG_1751H	NC_002607.1	1291955	1292908	-
VNG_1752C	NC_002607.1	1292962	1293393	-
VNG_1754G	NC_002607.1	1293457	1294845	-
VNG_1755G	NC_002607.1	1294848	1296404	-
VNG_1756G	NC_002607.1	1296505	1296789	+
VNG_1758H	NC_002607.1	1296996	1297283	+
VNG_1759G	NC_002607.1	1297280	1298917	+
VNG_1760G	NC_002607.1	1298933	1301365	-
VNG_1762G	NC_002607.1	1301370	1302374	-
VNG_1762a	NC_002607.1	1303226	1303474	-
VNG_1762b	NC_002607.1	1303550	1303840	-
VNG_1764G	NC_002607.1	1304168	1304881	-
VNG_1765G	NC_002607.1	1304883	1307177	-
VNG_1766C	NC_002607.1	1307267	1308028	-
VNG_1767G	NC_002607.1	1308056	1308874	-
VNG_1768G	NC_002607.1	1308878	1309261	-
VNG_1769C	NC_002607.1	1309363	1310139	-
VNG_1770C	NC_002607.1	1310187	1311929	-
VNG_1771C	NC_002607.1	1311933	1312283	-
VNG_1772G	NC_002607.1	1312357	1313013	-
VNG_1773G	NC_002607.1	1313067	1313342	-
VNG_1774G	NC_002607.1	1313406	1314716	-
VNG_1775C	NC_002607.1	1314713	1315375	-
VNG_1776G	NC_002607.1	1315383	1316441	-
VNG_1777H	NC_002607.1	1316499	1316915	-
VNG_1779C	NC_002607.1	1317052	1317960	+
VNG_1781C	NC_002607.1	1317980	1318588	-
VNG_1782C	NC_002607.1	1318677	1319999	+
VNG_1784C	NC_002607.1	1320001	1321221	-
VNG_1783H	NC_002607.1	1321352	1321564	+
VNG_1785G	NC_002607.1	1321561	1323051	+
VNG_1786H	NC_002607.1	1323053	1323331	-
VNG_1787H	NC_002607.1	1323441	1324298	+
VNG_1788C	NC_002607.1	1324350	1325255	+
VNG_1790H	NC_002607.1	1325295	1325654	+
VNG_1791C	NC_002607.1	1325656	1326339	-
VNG_1793C	NC_002607.1	1326538	1327446	+
VNG_1794C	NC_002607.1	1327456	1329540	-
VNG_1797G	NC_002607.1	1329752	1330657	-
VNG_1795C	NC_002607.1	1330778	1332094	+
VNG_1796H	NC_002607.1	1332167	1332484	+
VNG_1796a	NC_002607.1	1332510	1332824	-
VNG_1798H	NC_002607.1	1332857	1333429	-
VNG_1800H	NC_002607.1	1333485	1333676	-
VNG_1801G	NC_002607.1	1333815	1334330	-
VNG_1802H	NC_002607.1	1334327	1335148	-
VNG_1804G	NC_002607.1	1335461	1336714	+
VNG_1806H	NC_002607.1	1336842	1337075	+
VNG_1807H	NC_002607.1	1337141	1337560	+
VNG_1809H	NC_002607.1	1337618	1338166	+
VNG_1811G	NC_002607.1	1338204	1339508	-
VNG_1814G	NC_002607.1	1339799	1342927	+
VNG_1815G	NC_002607.1	1342998	1344059	-
VNG_1816G	NC_002607.1	1344157	1344570	+
VNG_1818G	NC_002607.1	1344610	1345239	+
VNG_1818a	NC_002607.1	1345287	1345697	+
VNG_1820H	NC_002607.1	1345750	1345983	-
VNG_1821G	NC_002607.1	1345983	1347026	-
VNG_1822G	NC_002607.1	1347117	1347734	+
VNG_1823C	NC_002607.1	1347731	1348438	+
VNG_1826H	NC_002607.1	1348491	1348718	+
VNG_1827H	NC_002607.1	1348757	1349077	-
VNG_1829G	NC_002607.1	1349130	1350047	-
VNG_1830G	NC_002607.1	1350047	1351708	-
VNG_1831H	NC_002607.1	1351798	1352574	-
VNG_1832H	NC_002607.1	1352444	1352584	-
VNG_1833C	NC_002607.1	1352827	1353444	-
VNG_1834G	NC_002607.1	1353536	1354081	+
VNG_1835G	NC_002607.1	1354112	1356034	-
VNG_1836G	NC_002607.1	1356243	1356452	+
VNG_1837G	NC_002607.1	1356582	1357613	-
VNG_1839H	NC_002607.1	1357610	1358623	-
VNG_1838H	NC_002607.1	1358744	1358941	+
VNG_1842H	NC_002607.1	1358949	1359830	-
VNG_1842a	NC_002607.1	1359875	1360213	-
VNG_1843C	NC_002607.1	1360326	1360982	+
VNG_1844G	NC_002607.1	1361018	1362301	+
VNG_1845C	NC_002607.1	1362298	1363230	+
VNG_1846C	NC_002607.1	1363231	1363962	-
VNG_1848H	NC_002607.1	1363962	1364237	-
VNG_1847G	NC_002607.1	1364334	1365500	+
VNG_1849H	NC_002607.1	1365510	1366976	-
VNG_1850G	NC_002607.1	1367036	1367812	-
VNG_1851G	NC_002607.1	1367861	1368748	-
VNG_1852H	NC_002607.1	1368773	1369591	-
VNG_1853G	NC_002607.1	1369650	1370594	-
VNG_1856G	NC_002607.1	1370637	1373054	-
VNG_1857C	NC_002607.1	1373051	1374292	-
VNG_1859G	NC_002607.1	1374390	1375028	+
VNG_1861C	NC_002607.1	1375087	1376385	+
VNG_1862G	NC_002607.1	1376404	1377303	-
VNG_1864G	NC_002607.1	1377344	1377889	-
VNG_1865H	NC_002607.1	1378010	1378210	+
VNG_1866G	NC_002607.1	1378248	1379138	-
VNG_1867G	NC_002607.1	1379187	1380002	-
VNG_1868G	NC_002607.1	1380002	1380895	-
VNG_1869C	NC_002607.1	1380897	1381994	-
VNG_1871G	NC_002607.1	1382218	1383342	+
VNG_1872C	NC_002607.1	1383349	1384233	-
VNG_1873G	NC_002607.1	1384332	1385600	+
VNG_1874C	NC_002607.1	1385685	1386209	+
VNG_1875G	NC_002607.1	1386216	1387433	-
VNG_1877C	NC_002607.1	1387529	1387846	+
VNG_1879G	NC_002607.1	1387843	1388991	+
VNG_1880C	NC_002607.1	1389042	1390562	+
VNG_1882G	NC_002607.1	1390684	1391808	+
VNG_1883G	NC_002607.1	1391811	1393340	+
VNG_1884G	NC_002607.1	1393327	1394133	+
VNG_1886C	NC_002607.1	1394134	1394925	-
VNG_1886a	NC_002607.1	1395028	1395366	+
VNG_1887G	NC_002607.1	1395369	1396895	-
VNG_1889H	NC_002607.1	1397013	1397267	-
VNG_1890H	NC_002607.1	1397374	1397820	-
VNG_1890a	NC_002607.1	1398141	1398386	+
VNG_1891H	NC_002607.1	1398710	1399948	+
VNG_1893G	NC_002607.1	1399992	1400741	+
VNG_1894C	NC_002607.1	1400742	1402349	+
VNG_1895H	NC_002607.1	1402357	1402704	-
VNG_1896C	NC_002607.1	1402807	1404606	+
VNG_1898C	NC_002607.1	1404655	1405080	+
VNG_1899G	NC_002607.1	1405118	1406317	-
VNG_1900C	NC_002607.1	1406440	1407288	+
VNG_1901C	NC_002607.1	1407337	1408272	+
VNG_1902H	NC_002607.1	1408320	1409180	-
VNG_1903C	NC_002607.1	1409286	1410086	-
VNG_1904H	NC_002607.1	1410174	1410275	-
VNG_1905C	NC_002607.1	1410377	1411957	-
VNG_1906H	NC_002607.1	1412058	1412615	+
VNG_t31	NC_002607.1	1412690	1412763	+
VNG_1907H	NC_002607.1	1412955	1413275	+
VNG_1907a	NC_002607.1	1413364	1413516	+
VNG_1907b	NC_002607.1	1413513	1413719	+
VNG_1910H	NC_002607.1	1413751	1414017	+
VNG_1911G	NC_002607.1	1414027	1415064	-
VNG_1912G	NC_002607.1	1415175	1416233	+
VNG_1914G	NC_002607.1	1416301	1416843	+
VNG_1916H	NC_002607.1	1416890	1417231	+
VNG_t32	NC_002607.1	1417310	1417392	+
VNG_1917H	NC_002607.1	1417462	1417815	+
VNG_1918C	NC_002607.1	1417818	1418579	-
VNG_1919H	NC_002607.1	1418630	1418989	-
VNG_1921H	NC_002607.1	1418986	1419372	-
VNG_1920H	NC_002607.1	1419466	1419942	+
VNG_1922G	NC_002607.1	1419958	1420185	-
VNG_1924G	NC_002607.1	1420186	1420863	-
VNG_1925H	NC_002607.1	1420953	1421192	+
VNG_1926G	NC_002607.1	1421211	1422257	-
VNG_1927H	NC_002607.1	1422323	1422649	+
VNG_1929G	NC_002607.1	1422660	1423259	-
VNG_1932G	NC_002607.1	1423358	1424245	+
VNG_1933G	NC_002607.1	1424403	1425587	+
VNG_1934H	NC_002607.1	1425565	1426359	+
VNG_1935C	NC_002607.1	1426359	1426988	+
VNG_1937C	NC_002607.1	1427045	1428148	+
VNG_1938C	NC_002607.1	1428155	1429516	-
VNG_1939G	NC_002607.1	1429664	1430680	+
VNG_1940H	NC_002607.1	1430826	1431071	+
VNG_1941C	NC_002607.1	1431151	1432230	+
VNG_1942H	NC_002607.1	1432237	1432575	-
VNG_1943H	NC_002607.1	1432621	1432788	-
VNG_1945G	NC_002607.1	1432842	1433516	-
VNG_1944C	NC_002607.1	1433513	1433767	-
VNG_1946G	NC_002607.1	1433893	1434804	+
VNG_1948H	NC_002607.1	1434889	1435803	+
VNG_1949G	NC_002607.1	1435809	1436240	-
VNG_1951G	NC_002607.1	1436310	1438067	-
VNG_1952H	NC_002607.1	1438138	1438911	-
VNG_1953C	NC_002607.1	1438929	1443020	-
VNG_1954H	NC_002607.1	1443227	1443508	-
VNG_1956H	NC_002607.1	1443507	1444004	+
VNG_1956a	NC_002607.1	1443684	1443971	-
VNG_1957G	NC_002607.1	1444126	1445883	-
VNG_1959G	NC_002607.1	1445947	1447422	-
VNG_1960H	NC_002607.1	1447469	1447639	-
VNG_1962C	NC_002607.1	1447671	1448213	-
VNG_1963H	NC_002607.1	1448212	1448781	+
VNG_1963a	NC_002607.1	1448260	1448799	-
VNG_1964H	NC_002607.1	1448861	1450033	-
VNG_1965H	NC_002607.1	1450110	1451159	-
VNG_1967G	NC_002607.1	1451162	1452694	-
VNG_1969G	NC_002607.1	1452915	1454627	+
VNG_1971G	NC_002607.1	1454617	1455900	+
VNG_1972G	NC_002607.1	1455893	1457290	+
VNG_1973H	NC_002607.1	1457335	1457967	-
VNG_1974H	NC_002607.1	1458039	1458560	+
VNG_1976H	NC_002607.1	1458716	1458949	+
VNG_1977H	NC_002607.1	1459030	1459941	+
VNG_1978H	NC_002607.1	1459955	1460374	+
VNG_t33	NC_002607.1	1461136	1461208	-
VNG_1980C	NC_002607.1	1461293	1461883	-
VNG_1983H	NC_002607.1	1461880	1463364	-
VNG_1983a	NC_002607.1	1462101	1463324	-
VNG_1982C	NC_002607.1	1463506	1464783	+
VNG_1984G	NC_002607.1	1464785	1465423	+
VNG_1985C	NC_002607.1	1465420	1467030	-
VNG_1986C	NC_002607.1	1467161	1467913	+
VNG_1987G	NC_002607.1	1467921	1469450	-
VNG_1988G	NC_002607.1	1469447	1470301	-
VNG_1989H	NC_002607.1	1470434	1470907	-
VNG_1991H	NC_002607.1	1470955	1471497	-
VNG_1992G	NC_002607.1	1471603	1472883	+
VNG_1993H	NC_002607.1	1472892	1473941	+
VNG_1994C	NC_002607.1	1473943	1474404	-
VNG_1995C	NC_002607.1	1474404	1474643	-
VNG_1997G	NC_002607.1	1474858	1476660	+
VNG_1998H	NC_002607.1	1476737	1477102	-
VNG_1999H	NC_002607.1	1477154	1477636	-
VNG_2000G	NC_002607.1	1477669	1478904	-
VNG_2001G	NC_002607.1	1479000	1480793	-
VNG_2002H	NC_002607.1	1480897	1482222	+
VNG_2003G	NC_002607.1	1482219	1483019	-
VNG_2005G	NC_002607.1	1483024	1484322	-
VNG_2006C	NC_002607.1	1484374	1484964	-
VNG_2008H	NC_002607.1	1484968	1485321	-
VNG_2010G	NC_002607.1	1485424	1485879	-
VNG_2011G	NC_002607.1	1486031	1486897	+
VNG_2012C	NC_002607.1	1486894	1488006	-
VNG_2014H	NC_002607.1	1488090	1488341	-
VNG_2014a	NC_002607.1	1488528	1488620	+
VNG_2015C	NC_002607.1	1488724	1489449	+
VNG_2017G	NC_002607.1	1489454	1491100	+
VNG_2019C	NC_002607.1	1491180	1492982	+
VNG_2020C	NC_002607.1	1492979	1493509	-
VNG_2021C	NC_002607.1	1493620	1495098	+
VNG_2021a	NC_002607.1	1495160	1495330	-
VNG_2023G	NC_002607.1	1495368	1496426	-
VNG_2024H	NC_002607.1	1496494	1496691	+
VNG_2025G	NC_002607.1	1496766	1497680	+
VNG_2027H	NC_002607.1	1497707	1497952	+
VNG_2028H	NC_002607.1	1497949	1498662	+
VNG_2029H	NC_002607.1	1498703	1499095	-
VNG_t34	NC_002607.1	1499204	1499274	-
VNG_2031G	NC_002607.1	1499405	1500211	+
VNG_2032G	NC_002607.1	1500208	1500882	-
VNG_2034H	NC_002607.1	1500795	1501619	-
VNG_2034a	NC_002607.1	1500942	1501607	+
VNG_t35	NC_002607.1	1501653	1501724	+
VNG_2035H	NC_002607.1	1501863	1502099	+
VNG_2036G	NC_002607.1	1502096	1502665	-
VNG_2037C	NC_002607.1	1502692	1504212	-
VNG_2039H	NC_002607.1	1504566	1505333	+
VNG_2041H	NC_002607.1	1505291	1505692	-
VNG_2041a	NC_002607.1	1505330	1505425	+
VNG_2042H	NC_002607.1	1505415	1505888	+
VNG_2043G	NC_002607.1	1505903	1506457	-
VNG_2044H	NC_002607.1	1506498	1506779	-
VNG_2045G	NC_002607.1	1506828	1508426	-
VNG_2047G	NC_002607.1	1508435	1508569	-
VNG_2048G	NC_002607.1	1508571	1508879	-
VNG_2049C	NC_002607.1	1508935	1509468	-
VNG_2051G	NC_002607.1	1509474	1509671	-
VNG_2053G	NC_002607.1	1509672	1510244	-
VNG_2054H	NC_002607.1	1510248	1510631	-
VNG_2056G	NC_002607.1	1510636	1511880	-
VNG_2059H	NC_002607.1	1512003	1512983	+
VNG_2060G	NC_002607.1	1512989	1513810	-
VNG_2062G	NC_002607.1	1513807	1515123	-
VNG_2064H	NC_002607.1	1515193	1516908	-
VNG_2063G	NC_002607.1	1517038	1518180	+
VNG_2065G	NC_002607.1	1518251	1519024	+
VNG_2067H	NC_002607.1	1519017	1519487	+
VNG_2068C	NC_002607.1	1519498	1521363	-
VNG_2071G	NC_002607.1	1521456	1523408	-
VNG_2073C	NC_002607.1	1523420	1524328	-
VNG_2072G	NC_002607.1	1524446	1525828	+
VNG_2074H	NC_002607.1	1525893	1526222	-
VNG_2075C	NC_002607.1	1526305	1526802	+
VNG_2076G	NC_002607.1	1526849	1526992	+
VNG_2079G	NC_002607.1	1527060	1527491	-
VNG_2078G	NC_002607.1	1527488	1528024	-
VNG_2080C	NC_002607.1	1528082	1528699	-
VNG_2081H	NC_002607.1	1528776	1528961	+
VNG_2081a	NC_002607.1	1528958	1529506	+
VNG_2082G	NC_002607.1	1529564	1530145	+
VNG_2084G	NC_002607.1	1530149	1531144	-
VNG_2085G	NC_002607.1	1531141	1531983	-
VNG_2086G	NC_002607.1	1532071	1533033	-
VNG_2087G	NC_002607.1	1533185	1533841	+
VNG_2087a	NC_002607.1	1533929	1534282	-
VNG_2088G	NC_002607.1	1534374	1535489	+
VNG_2089H	NC_002607.1	1535505	1535945	+
VNG_2091H	NC_002607.1	1535942	1536769	+
VNG_2093G	NC_002607.1	1536751	1538115	-
VNG_2094G	NC_002607.1	1538241	1538705	+
VNG_2096G	NC_002607.1	1538840	1540510	-
VNG_2097C	NC_002607.1	1540767	1541972	+
VNG_t36	NC_002607.1	1542021	1542102	-
VNG_2098H	NC_002607.1	1542149	1542343	-
VNG_2099C	NC_002607.1	1542347	1542730	-
VNG_2100G	NC_002607.1	1542781	1544013	-
VNG_2101H	NC_002607.1	1544296	1544730	+
VNG_2102G	NC_002607.1	1544781	1545911	-
VNG_2104G	NC_002607.1	1546022	1547278	+
VNG_2105H	NC_002607.1	1547275	1547544	-
VNG_2106G	NC_002607.1	1547630	1548586	+
VNG_2108G	NC_002607.1	1548632	1549723	+
VNG_2109H	NC_002607.1	1549720	1549941	-
VNG_2110C	NC_002607.1	1550019	1551281	-
VNG_2112C	NC_002607.1	1551415	1552377	+
VNG_2113C	NC_002607.1	1552374	1553504	-
VNG_2115H	NC_002607.1	1553564	1553809	-
VNG_2116C	NC_002607.1	1553875	1555311	-
VNG_2117C	NC_002607.1	1555430	1556149	-
VNG_2118G	NC_002607.1	1556228	1556755	-
VNG_2119C	NC_002607.1	1556811	1557356	-
VNG_2120G	NC_002607.1	1557442	1558281	+
VNG_2121C	NC_002607.1	1558353	1558970	+
VNG_2122G	NC_002607.1	1559008	1559934	-
VNG_2123G	NC_002607.1	1560066	1561541	+
VNG_2124C	NC_002607.1	1561543	1563291	-
VNG_2125G	NC_002607.1	1563368	1564036	-
VNG_2126C	NC_002607.1	1564023	1564724	-
VNG_2128C	NC_002607.1	1564788	1565765	-
VNG_2129H	NC_002607.1	1565967	1566074	-
VNG_2130G	NC_002607.1	1566101	1567018	-
VNG_2131G	NC_002607.1	1567133	1568383	+
VNG_2132G	NC_002607.1	1568401	1569063	-
VNG_2133H	NC_002607.1	1569140	1569532	-
VNG_2135G	NC_002607.1	1569547	1570221	-
VNG_2136G	NC_002607.1	1570278	1571300	-
VNG_2137G	NC_002607.1	1571291	1572004	-
VNG_2138G	NC_002607.1	1572295	1573710	-
VNG_2139G	NC_002607.1	1573716	1575473	-
VNG_2140G	NC_002607.1	1575479	1575841	-
VNG_2141G	NC_002607.1	1575838	1576896	-
VNG_2142G	NC_002607.1	1576893	1577480	-
VNG_2143G	NC_002607.1	1577503	1577772	-
VNG_2144G	NC_002607.1	1577784	1579952	-
VNG_2146H	NC_002607.1	1579939	1580271	-
VNG_2147G	NC_002607.1	1580373	1581002	+
VNG_2147a	NC_002607.1	1580999	1581460	-
VNG_2148H	NC_002607.1	1581505	1582740	-
VNG_2149H	NC_002607.1	1582844	1584007	+
VNG_2150G	NC_002607.1	1584077	1584877	+
VNG_2151G	NC_002607.1	1584874	1585842	+
VNG_2152C	NC_002607.1	1585866	1586516	-
VNG_2153G	NC_002607.1	1586648	1587550	+
VNG_2154C	NC_002607.1	1587552	1588637	-
VNG_2155C	NC_002607.1	1588762	1589757	+
VNG_2156C	NC_002607.1	1589811	1591532	-
VNG_2157C	NC_002607.1	1591653	1592105	+
VNG_2158G	NC_002607.1	1592154	1592939	+
VNG_2159G	NC_002607.1	1592950	1593945	-
VNG_2160C	NC_002607.1	1594121	1595053	+
VNG_2162C	NC_002607.1	1595055	1595627	+
VNG_2163H	NC_002607.1	1595672	1596076	+
VNG_2164C	NC_002607.1	1596089	1596541	-
VNG_t37	NC_002607.1	1596638	1596710	+
VNG_2165H	NC_002607.1	1596897	1597652	+
VNG_2166C	NC_002607.1	1597649	1598716	-
VNG_2167G	NC_002607.1	1598752	1601007	-
VNG_2168C	NC_002607.1	1601058	1602230	-
VNG_2171G	NC_002607.1	1602287	1603492	-
VNG_2170H	NC_002607.1	1603604	1603987	+
VNG_2172C	NC_002607.1	1603994	1605088	-
VNG_2173G	NC_002607.1	1605214	1607268	+
VNG_t38	NC_002607.1	1607319	1607391	+
VNG_2174H	NC_002607.1	1607756	1607902	-
VNG_2175H	NC_002607.1	1608193	1609467	+
VNG_2177H	NC_002607.1	1609956	1610333	-
VNG_2177a	NC_002607.1	1610523	1610774	-
VNG_2178H	NC_002607.1	1610790	1611068	-
VNG_2178a	NC_002607.1	1611108	1611503	-
VNG_2179H	NC_002607.1	1611613	1611984	+
VNG_2180C	NC_002607.1	1611981	1613648	-
VNG_2181G	NC_002607.1	1613809	1616448	+
VNG_2182H	NC_002607.1	1616518	1616856	+
VNG_2183H	NC_002607.1	1616853	1617650	+
VNG_2184G	NC_002607.1	1617647	1618510	-
VNG_2185H	NC_002607.1	1618682	1619212	+
VNG_2185a	NC_002607.1	1619183	1619932	-
VNG_2186G	NC_002607.1	1619975	1620403	-
VNG_2187H	NC_002607.1	1620447	1620665	-
VNG_2189H	NC_002607.1	1620746	1620976	+
VNG_2190G	NC_002607.1	1621029	1624241	+
VNG_2191H	NC_002607.1	1624252	1624827	-
VNG_2193G	NC_002607.1	1624849	1626546	-
VNG_2195G	NC_002607.1	1626543	1627094	-
VNG_2196G	NC_002607.1	1627091	1627957	-
VNG_2197H	NC_002607.1	1628164	1628355	+
VNG_2199H	NC_002607.1	1628365	1629180	+
VNG_2201G	NC_002607.1	1629182	1631587	+
VNG_2202H	NC_002607.1	1631584	1632243	+
VNG_2203G	NC_002607.1	1632254	1633099	-
VNG_2204H	NC_002607.1	1633922	1634779	-
VNG_2205H	NC_002607.1	1634861	1635313	+
VNG_2206G	NC_002607.1	1635310	1636677	+
VNG_2207H	NC_002607.1	1636674	1637807	-
VNG_2208G	NC_002607.1	1637859	1639400	-
VNG_2210G	NC_002607.1	1639397	1640428	-
VNG_2211H	NC_002607.1	1640451	1641179	-
VNG_2213G	NC_002607.1	1641218	1643557	-
VNG_2214G	NC_002607.1	1643594	1645003	-
VNG_2216G	NC_002607.1	1645123	1646058	+
VNG_2217G	NC_002607.1	1646284	1647399	+
VNG_2218G	NC_002607.1	1647404	1648378	+
VNG_2219G	NC_002607.1	1648380	1649816	+
VNG_2220G	NC_002607.1	1649819	1651243	+
VNG_2222G	NC_002607.1	1651293	1652105	+
VNG_2223G	NC_002607.1	1652109	1654766	-
VNG_2224G	NC_002607.1	1654897	1655883	-
VNG_2226G	NC_002607.1	1656061	1657749	-
VNG_2227C	NC_002607.1	1657929	1658480	-
VNG_2230H	NC_002607.1	1658526	1659356	-
VNG_2231C	NC_002607.1	1659394	1660737	-
VNG_2232G	NC_002607.1	1660818	1661960	-
VNG_2233C	NC_002607.1	1662177	1663112	-
VNG_2234G	NC_002607.1	1663129	1663416	-
VNG_2236H	NC_002607.1	1663515	1663694	+
VNG_2237G	NC_002607.1	1663836	1664819	-
VNG_2238C	NC_002607.1	1664886	1666853	-
VNG_2239C	NC_002607.1	1666899	1667825	-
VNG_2240G	NC_002607.1	1667940	1668944	+
VNG_2241H	NC_002607.1	1668976	1669326	+
VNG_2242C	NC_002607.1	1669327	1670295	-
VNG_2243G	NC_002607.1	1670410	1670970	+
VNG_2244H	NC_002607.1	1670977	1671342	+
VNG_2246H	NC_002607.1	1671404	1671772	+
VNG_2247G	NC_002607.1	1671775	1672623	-
VNG_2248H	NC_002607.1	1672712	1673287	+
VNG_2249G	NC_002607.1	1673284	1674579	+
VNG_2251G	NC_002607.1	1674660	1675943	+
VNG_2252G	NC_002607.1	1676048	1676473	+
VNG_2253H	NC_002607.1	1676537	1676740	+
VNG_2254C	NC_002607.1	1676737	1677819	-
VNG_2255C	NC_002607.1	1677905	1678495	+
VNG_2256G	NC_002607.1	1678565	1679308	-
VNG_2257G	NC_002607.1	1679387	1680421	-
VNG_2259C	NC_002607.1	1680625	1682103	+
VNG_2260H	NC_002607.1	1682108	1682893	-
VNG_2262H	NC_002607.1	1682974	1683393	+
VNG_2262a	NC_002607.1	1683399	1683974	-
VNG_2263G	NC_002607.1	1684061	1684840	+
VNG_2264C	NC_002607.1	1684849	1685562	-
VNG_2268H	NC_002607.1	1685552	1685743	-
VNG_2267G	NC_002607.1	1685806	1687980	-
VNG_2269G	NC_002607.1	1688071	1689105	+
VNG_2270G	NC_002607.1	1689152	1691161	+
VNG_2271G	NC_002607.1	1691265	1692389	+
VNG_2272G	NC_002607.1	1692434	1693111	+
VNG_2273H	NC_002607.1	1693173	1693340	-
VNG_2273a	NC_002607.1	1693592	1693741	+
VNG_2274C	NC_002607.1	1693780	1694013	+
VNG_2276G	NC_002607.1	1694075	1695448	+
VNG_2277H	NC_002607.1	1695463	1695858	-
VNG_2279H	NC_002607.1	1695860	1696084	-
VNG_2280G	NC_002607.1	1696383	1697351	+
VNG_2281C	NC_002607.1	1697360	1698343	-
VNG_2282C	NC_002607.1	1698432	1699142	+
VNG_2283G	NC_002607.1	1699204	1701993	+
VNG_2284G	NC_002607.1	1702009	1702398	-
VNG_2285C	NC_002607.1	1702444	1703388	-
VNG_2286G	NC_002607.1	1703613	1704062	+
VNG_2288G	NC_002607.1	1704069	1705499	+
VNG_2289G	NC_002607.1	1705499	1706755	+
VNG_2290G	NC_002607.1	1706814	1707440	+
VNG_2291G	NC_002607.1	1707437	1708912	+
VNG_2292H	NC_002607.1	1708941	1710236	-
VNG_2293G	NC_002607.1	1710444	1710833	-
VNG_2294G	NC_002607.1	1710976	1711704	+
VNG_2295G	NC_002607.1	1711756	1712346	+
VNG_2297H	NC_002607.1	1712375	1712872	-
VNG_2296C	NC_002607.1	1712999	1713502	+
VNG_2298H	NC_002607.1	1713499	1713858	-
VNG_2298a	NC_002607.1	1713943	1714563	+
VNG_2301G	NC_002607.1	1714837	1715721	+
VNG_2302G	NC_002607.1	1715785	1717809	+
VNG_2304H	NC_002607.1	1717821	1718060	-
VNG_2305C	NC_002607.1	1718107	1718790	-
VNG_2306H	NC_002607.1	1718884	1719567	+
VNG_2307C	NC_002607.1	1719630	1720811	+
VNG_2308G	NC_002607.1	1720826	1722199	-
VNG_2310H	NC_002607.1	1722306	1722596	+
VNG_2311H	NC_002607.1	1722596	1723111	+
VNG_2312C	NC_002607.1	1723198	1723794	+
VNG_2312a	NC_002607.1	1723795	1724460	-
VNG_2313H	NC_002607.1	1724502	1725131	-
VNG_2314H	NC_002607.1	1725128	1725775	-
VNG_2315H	NC_002607.1	1725842	1726444	-
VNG_2316C	NC_002607.1	1726551	1727159	+
VNG_2317G	NC_002607.1	1727159	1727857	+
VNG_2317a	NC_002607.1	1727854	1728561	+
VNG_2320G	NC_002607.1	1728627	1730762	+
VNG_2321G	NC_002607.1	1730838	1731404	-
VNG_2321a	NC_002607.1	1731479	1731667	+
VNG_2322G	NC_002607.1	1731824	1732804	+
VNG_2323H	NC_002607.1	1732811	1733473	+
VNG_2324H	NC_002607.1	1733574	1734221	+
VNG_2326G	NC_002607.1	1734261	1735598	+
VNG_2328H	NC_002607.1	1735647	1736165	+
VNG_2329C	NC_002607.1	1736162	1736689	+
VNG_2330G	NC_002607.1	1736746	1737936	+
VNG_2331G	NC_002607.1	1737938	1738678	+
VNG_2332G	NC_002607.1	1738675	1739391	+
VNG_2333C	NC_002607.1	1739430	1740857	+
VNG_2334C	NC_002607.1	1740866	1744771	-
VNG_2335H	NC_002607.1	1745421	1745762	+
VNG_2337C	NC_002607.1	1745788	1746138	+
VNG_2338G	NC_002607.1	1746166	1750278	-
VNG_2339C	NC_002607.1	1750278	1750697	-
VNG_2339a	NC_002607.1	1750756	1750920	-
VNG_2340H	NC_002607.1	1751063	1751614	+
VNG_2341H	NC_002607.1	1751629	1751850	-
VNG_2342H	NC_002607.1	1751873	1752277	-
VNG_2343G	NC_002607.1	1752286	1753623	-
VNG_2344G	NC_002607.1	1753620	1754711	-
VNG_2346G	NC_002607.1	1754712	1756292	-
VNG_2347G	NC_002607.1	1756297	1757388	-
VNG_2349G	NC_002607.1	1757520	1759376	-
VNG_2351C	NC_002607.1	1759702	1760559	+
VNG_2352G	NC_002607.1	1760552	1762282	+
VNG_2353H	NC_002607.1	1762279	1762836	+
VNG_2356G	NC_002607.1	1762885	1765239	+
VNG_2358G	NC_002607.1	1765447	1767408	+
VNG_2359G	NC_002607.1	1767435	1768415	+
VNG_2361G	NC_002607.1	1768417	1769577	+
VNG_2363G	NC_002607.1	1769574	1770602	+
VNG_2365G	NC_002607.1	1770599	1771921	+
VNG_2366C	NC_002607.1	1771918	1772466	-
VNG_2367G	NC_002607.1	1772642	1773556	+
VNG_2370C	NC_002607.1	1773582	1773830	-
VNG_2368G	NC_002607.1	1773915	1776266	+
VNG_2369C	NC_002607.1	1776263	1776760	+
VNG_t39	NC_002607.1	1776879	1776951	-
VNG_2371C	NC_002607.1	1777089	1777673	+
VNG_2372G	NC_002607.1	1777719	1778402	+
VNG_2373G	NC_002607.1	1778408	1779754	-
VNG_2374G	NC_002607.1	1779843	1781027	-
VNG_2376H	NC_002607.1	1781166	1781561	+
VNG_2377G	NC_002607.1	1781563	1782360	-
VNG_2378G	NC_002607.1	1782357	1783271	-
VNG_2379H	NC_002607.1	1783339	1783593	-
VNG_2380H	NC_002607.1	1783654	1784313	-
VNG_2381G	NC_002607.1	1784408	1786180	+
VNG_2383G	NC_002607.1	1786190	1787185	-
VNG_2384G	NC_002607.1	1787185	1789599	-
VNG_2385H	NC_002607.1	1789808	1789984	+
VNG_2386C	NC_002607.1	1789985	1790419	-
VNG_2387H	NC_002607.1	1790325	1791011	+
VNG_2387a	NC_002607.1	1790421	1791509	-
VNG_2390G	NC_002607.1	1791684	1793753	-
VNG_2392H	NC_002607.1	1793801	1794433	-
VNG_2393G	NC_002607.1	1794527	1795381	-
VNG_2394G	NC_002607.1	1795504	1796277	+
VNG_2395C	NC_002607.1	1796340	1797398	+
VNG_2396G	NC_002607.1	1797395	1799215	+
VNG_2397G	NC_002607.1	1799212	1800243	+
VNG_2398G	NC_002607.1	1800247	1800924	-
VNG_2399H	NC_002607.1	1800999	1801430	+
VNG_2400H	NC_002607.1	1801510	1802088	+
VNG_2403H	NC_002607.1	1802096	1802881	-
VNG_2402H	NC_002607.1	1802881	1802964	-
VNG_2404G	NC_002607.1	1803013	1804554	-
VNG_2406C	NC_002607.1	1804702	1805370	-
VNG_2408C	NC_002607.1	1805370	1805768	-
VNG_2410G	NC_002607.1	1805775	1806419	-
VNG_2411G	NC_002607.1	1807230	1808786	+
VNG_2412H	NC_002607.1	1808793	1809071	-
VNG_2413H	NC_002607.1	1809086	1809604	-
VNG_2414H	NC_002607.1	1809763	1810137	+
VNG_2415H	NC_002607.1	1810134	1810406	+
VNG_2416G	NC_002607.1	1810411	1811130	-
VNG_2417G	NC_002607.1	1811242	1812768	+
VNG_2418G	NC_002607.1	1812830	1814005	+
VNG_2419C	NC_002607.1	1814015	1815178	-
VNG_2420G	NC_002607.1	1815349	1816473	+
VNG_2421G	NC_002607.1	1816543	1817838	+
VNG_2422G	NC_002607.1	1817907	1820945	+
VNG_2423G	NC_002607.1	1820955	1821590	-
VNG_2424G	NC_002607.1	1821747	1823330	+
VNG_2426G	NC_002607.1	1823392	1823835	+
VNG_2429G	NC_002607.1	1823906	1825078	+
VNG_2430G	NC_002607.1	1825082	1826329	-
VNG_2431C	NC_002607.1	1826400	1826666	-
VNG_2432C	NC_002607.1	1826736	1827050	-
VNG_2433H	NC_002607.1	1827120	1827608	-
VNG_2436G	NC_002607.1	1827624	1829081	-
VNG_2437G	NC_002607.1	1829078	1830268	-
VNG_2439H	NC_002607.1	1830494	1830991	-
VNG_2439a	NC_002607.1	1830542	1830736	+
VNG_2440H	NC_002607.1	1830780	1831307	+
VNG_2441G	NC_002607.1	1831314	1833545	-
VNG_2442H	NC_002607.1	1833667	1833810	+
VNG_2443G	NC_002607.1	1833843	1834391	-
VNG_2444C	NC_002607.1	1834595	1835107	+
VNG_2445C	NC_002607.1	1835158	1835790	-
VNG_2446H	NC_002607.1	1835896	1836027	+
VNG_2447G	NC_002607.1	1836024	1837040	-
[truncated: 2,005 more rows]

## Sheet: S1b. Summary
Antisense RNAs identified in by de Almeida et al. (2019)
Insertion sequences						color code:
New transcripts						O < L	L < O
						means for normalization					means for normalization
						1.2156	1.49812				-0.536769	0.210179
						Replicate 1	Replicate 2	Transcriptome microarray (Coker et al 2007)	Proteomics (Leuko et al 2006)
ID	locus	locus NCBI	NCBI_product	NCBI_gene_name		log2(L/O)	log2(L/O)	log2(L/O)	log2(L/O)		log2(O2/O1)	log2(L1/L2)
gene-VNG_0001H|VNG_0001H|VNG_0001H	VNG_0001H	VNG_RS00010	hypothetical protein	VNG_RS00010		-0.904734	-0.661616				0.528341	-0.72739
gene-VNG_0002G|VNG_0002G|VNG_0002G	VNG_0002G	VNG_RS00015	ABC transporter ATP-binding protein	VNG_RS00015		-0.671678	-0.432354				0.582488	-0.777742
gene-VNG_0003C|VNG_0003C|VNG_0003C	VNG_0003C	VNG_RS00020	ABC transporter permease	VNG_RS00020		-0.91491	-0.79572				1.0779	-1.15302
gene-VNG_0005H|VNG_0005H|VNG_0005H	VNG_0005H	VNG_RS00025	hypothetical protein	VNG_RS00025		-1.50056	0.253496				-0.115348	-1.59464
gene-VNG_0006G|VNG_0006G|glmS	VNG_0006G	VNG_RS00030	glutamine--fructose-6-phosphate transaminase(isomerizing)	glmS		-0.264862	-0.10715				0.0195442	-0.133187
gene-VNG_0008G|VNG_0008G|graD5	VNG_0008G	VNG_RS00035	NTP transferase domain -containing protein	VNG_RS00035		-0.840044	-0.222268				-0.361725	-0.211981
gene-VNG_0009G|VNG_0009G|graD2	VNG_0009G	VNG_RS00040	NTP transferase domain -containing protein	VNG_RS00040		0.84865	1.39772				-0.144494	-0.360507
gene-VNG_0011C|VNG_0011C|VNG_0011C	VNG_0011C	VNG_RS00045	sugar transferase	VNG_RS00045		1.24908	2.73075				-0.424602	-1.01299
gene-VNG_0015H|VNG_0015H|VNG_0015H	VNG_0015H	VNG_RS00055	hypothetical protein	VNG_RS00055		0.413713						0.659121
gene-VNG_0016H|VNG_0016H|VNG_0016H	VNG_0016H	VNG_RS00060	MarR family transcriptional regulator	VNG_RS00060		0.150679	-0.263295					0.28061
gene-VNG_0019H|VNG_0019H|VNG_0019H	VNG_0019H					-0.671678	0.0861134				-0.002475	-0.711247
gene-VNG_0020H|VNG_0020H|VNG_0020H	VNG_0020H	VNG_RS00075	hypothetical protein	VNG_RS00075
gene-VNG_0022H|VNG_0022H|VNG_0022H	VNG_0022H	VNG_RS00085	hypothetical protein	VNG_RS00085
gene-VNG_0023H|VNG_0023H|VNG_0023H	VNG_0023H	VNG_RS00090	hypothetical protein	VNG_RS00090			0.680121					-0.855452
gene-VNG_0024H|VNG_0024H|VNG_0024H	VNG_0024H	VNG_RS00095	hypothetical protein	VNG_RS00095								1.65912
gene-VNG_0025H|VNG_0025H|VNG_0025H	VNG_0025H	VNG_RS00100	hypothetical protein	VNG_RS00100		0.221068	0.881755				0.440468	-1.05709
gene-VNG_0027H|VNG_0027H|VNG_0027H	VNG_0027H	VNG_RS13175	hypothetical protein	VNG_RS13175
gene-VNG_0029a|VNG_0029a|VNG_0029a	VNG_0029a
gene-VNG_0029H|VNG_0029H|VNG_0029H	VNG_0029H	VNG_RS13180	hypothetical protein	VNG_RS13180
gene-VNG_0030H|VNG_0030H|VNG_0030H	VNG_0030H	VNG_RS13185	hypothetical protein	VNG_RS13185
gene-VNG_0031H|VNG_0031H|VNG_0031H	VNG_0031H	VNG_RS00115	hypothetical protein	VNG_RS00115		1.33971	0.84362				1.44047	-0.900306
gene-VNG_0032H|VNG_0032H|VNG_0032H	VNG_0032H	VNG_RS13190	hypothetical protein	VNG_RS13190		2.22107	1.00205					-0.592417
gene-VNG_0033H|VNG_0033H|VNG_0033H	VNG_0033H	VNG_RS13195	hypothetical protein	VNG_RS13195
gene-VNG_0037H|VNG_0037H|VNG_0037H	VNG_0037H	VNG_RS00135	typeII toxin-antitoxin system HicB family antitoxin	VNG_RS00135		-0.333979	-0.606183				-0.0513846	0.367659
gene-VNG_0038H|VNG_0038H|VNG_0038H	VNG_0038H	VNG_RS00140	typeII toxin-antitoxin system HicA family toxin	VNG_RS00140		0.300819	0.11308				-0.0986903	0.330499
gene-VNG_0039H|VNG_0039H|VNG_0039H	VNG_0039H	VNG_RS00145	MarR family transcriptional regulator	VNG_RS00145		-0.354113	-0.297853				0.163628	-0.175819
gene-VNG_0040C|VNG_0040C|VNG_0040C	VNG_0040C	VNG_RS00150	transcriptional regulator	VNG_RS00150		-1.19724	-1.26072				0.474416	-0.366874
gene-VNG_0041C|VNG_0041C|VNG_0041C	VNG_0041C	VNG_RS00155	hypothetical protein	VNG_RS00155		-0.998782	-1.28817				0.0481511	0.285307
gene-VNG_0045C|VNG_0045C|orc9	VNG_0045C	VNG_RS00175	AAA family ATPase	VNG_RS00175		0.051143	0.47367					-0.649001
gene-VNG_0046G|VNG_0046G|aglM2	VNG_0046G	VNG_RS00180	UDP-glucose/GDP-mannosedehydrogenase family protein	VNG_RS00180		0.27621	-0.239709				1.20343	-0.643441
gene-VNG_0047G|VNG_0047G|aglF1	VNG_0047G	VNG_RS00185	sugarnucleotidyl transferase	VNG_RS00185		1.41371	0.251278				1.66286	-0.456356
gene-VNG_0049H|VNG_0049H|VNG_0049H	VNG_0049H	VNG_RS13205	FkbM family methyl transferase	VNG_RS13205			0.428582					-2.14823
gene-VNG_0050C|VNG_0050C|VNG_0050C	VNG_0050C	VNG_RS13210	lipopolysaccharide biosynthesis protein	VNG_RS13210
gene-VNG_0051G|VNG_0051G|gth6	VNG_0051G	VNG_RS00195	glycosyl transferase family 4 protein	VNG_RS00195		-1.73829	-1.18929				-0.218495	-0.286431
gene-VNG_0054H|VNG_0054H|VNG_0054H	VNG_0054H	VNG_RS00215	hypothetical protein	VNG_RS00215
gene-VNG_0055H|VNG_0055H|VNG_0055H	VNG_0055H	VNG_RS13215	hypothetical protein	VNG_RS13215
gene-VNG_0056a|VNG_0056a|VNG_0056a	VNG_0056a											-1.07784
gene-VNG_0057H|VNG_0057H|VNG_0057H	VNG_0057H	VNG_RS00235	hypothetical protein	VNG_RS00235
gene-VNG_0058H|VNG_0058H|VNG_0058H	VNG_0058H	VNG_RS00240	hypothetical protein	VNG_RS00240		-2.39364	-0.641807				-0.781924	-0.925841
gene-VNG_0060G|VNG_0060G|gth4	VNG_0060G	VNG_RS13220	glycosyl transferase family 4 protein	VNG_RS13220		-0.668749	0.390614				-0.270025	-0.745269
gene-VNG_0061C|VNG_0061C|VNG_0061C	VNG_0061C	VNG_RS00250	sulfatase-likehydrolase/ transferase	VNG_RS00250		-0.348127	-0.554344				0.155066	0.0952206
gene-VNG_0062G|VNG_0062G|gth5	VNG_0062G	VNG_RS00255	glycosyl transferase family 4 protein	VNG_RS00255		0.413713	0.123728					-0.521451
gene-VNG_0063G|VNG_0063G|VNG_0063G	VNG_0063G	VNG_RS00260	SDR family oxidoreductase	VNG_RS00260		-1.80868	0.528118				-0.951849	-1.34088
gene-VNG_0064G|VNG_0064G|graD3	VNG_0064G	VNG_RS00265	sugarnucleotidyl transferase	VNG_RS00265		-0.171249	2.35819					-0.170954
gene-VNG_0065G|VNG_0065G|VNG_0065G	VNG_0065G	VNG_RS00270	SDR family oxidoreductase	VNG_RS00270		-0.171249	0.860693					-0.428341
gene-VNG_0066H|VNG_0066H|VNG_0066H	VNG_0066H	VNG_RS00275	UPF0175 family protein	VNG_RS00275		-0.83683	-1.22677				0.238835	0.195174
gene-VNG_0069H|VNG_0069H|VNG_0069H	VNG_0069H	VNG_RS13225	hypothetical protein	VNG_RS13225		0.404435	-0.292223				0.109263	0.631465
gene-VNG_0070H|VNG_0070H|VNG_0070H	VNG_0070H	VNG_RS00290	plasmidstabilization protein	VNG_RS00290		0.920249	-0.424996				0.672642	0.716673
gene-VNG_0072a|VNG_0072a|VNG_0072a	VNG_0072a											-0.925841
gene-VNG_0072H|VNG_0072H|VNG_0072H	VNG_0072H	VNG_RS00295	typeIItoxin-antitoxinsystemVapC family toxin	VNG_RS00295		0.091785	1.35819					-0.755916
gene-VNG_0076H|VNG_0076H|VNG_0076H	VNG_0076H
gene-VNG_0077a|VNG_0077a|VNG_0077a	VNG_0077a					0.636106	0.902513					-1.07784
gene-VNG_0077H|VNG_0077H|VNG_0077H	VNG_0077H	VNG_RS00315	DUF4330 family protein	VNG_RS00315		-0.143769	0.358193				0.614498	-1.07239
gene-VNG_0079H|VNG_0079H|VNG_0079H	VNG_0079H
gene-VNG_0080H|VNG_0080H|VNG_0080H	VNG_0080H	VNG_RS00325	VanZ family protein	vanZ			1.81762					-1.47838
gene-VNG_0081G|VNG_0081G|moaE	VNG_0081G	VNG_RS00330	molybdopterin synthase	VNG_RS00330		0.413713	-0.378773					0.829046
gene-VNG_0084G|VNG_0084G|ubaA	VNG_0084G	VNG_RS00335	molybdopterin-synthaseadenyl transferaseMoeB	moeB		0.594285	0.232662					0.287153
gene-VNG_0085G|VNG_0085G|moaA	VNG_0085G	VNG_RS00340	GTP3',8-cyclase MoaA	moaA		0.288182	0.184164				0.314938	-0.166849
gene-VNG_0086G|VNG_0086G|moeA2	VNG_0086G	VNG_RS00345	molybdopterin biosynthesis protein	VNG_RS00345		0.503911	0.251278				-0.291335	0.588038
gene-VNG_0089G|VNG_0089G|pimT1	VNG_0089G	VNG_RS00355	protein -L-isoaspartate O-methyl transferase	VNG_RS00355		0.776283	0.550838				-0.144494	0.414009
gene-VNG_0090G|VNG_0090G|moeA1	VNG_0090G	VNG_RS00350	molybdopterin molybdo transferase MoeA	VNG_RS00350		0.254056	0.550838				-1.46642	1.21371
gene-VNG_0091C|VNG_0091C|VNG_0091C	VNG_0091C	VNG_RS00360	hypothetical protein	VNG_RS00360								2.16162
gene-VNG_0094C|VNG_0094C|VNG_0094C	VNG_0094C	VNG_RS00365	hypothetical protein	VNG_RS00365		1.08831	0.193134				0.36452	0.574729
gene-VNG_0095G|VNG_0095G|gap	VNG_0095G	VNG_RS00375	typeII glyceraldehyde-3-phosphate dehydrogenase	VNG_RS00375		1.29954	2.68462		1.07629		-0.668056	-0.672955
gene-VNG_0096C|VNG_0096C|pepB4	VNG_0096C	VNG_RS00370	aminopeptidase	VNG_RS00370		0.344874	0.0744				-0.55437	0.868914
gene-VNG_0097G|VNG_0097G|hsp20A	VNG_0097G	VNG_RS00380	Hsp20/alphacrystallin family protein	VNG_RS00380		1.12248	1.13078				0.0712347	-0.0354655
gene-VNG_0098G|VNG_0098G|VNG_0098G	VNG_0098G	VNG_RS00385	RimK family alpha-L-glutamateligase	VNG_RS00385		2.0382	0.990461					-0.0856214
gene-VNG_0099G|VNG_0099G|rpl16	VNG_0099G	VNG_RS00390	50Sribosomal protein L16	VNG_RS00390		-0.850916	0.833926				-1.05938	-0.581395
gene-VNG_0101G|VNG_0101G|cspA1	VNG_0101G	VNG_RS00395	cold-shock protein	VNG_RS00395		0.52919	1.19841	0.502			0.00234739	-0.6275
gene-VNG_0102C|VNG_0102C|VNG_0102C	VNG_0102C	VNG_RS00400	HAD family hydrolase	VNG_RS00400		0.0708254	-0.531383				0.614498	0.0317804
gene-VNG_0104G|VNG_0104G|serA3	VNG_0104G	VNG_RS00405	C-terminal binding protein	VNG_RS00405		-0.8056	-0.430303				-0.597006	0.265779
gene-VNG_0105H|VNG_0105H|VNG_0105H	VNG_0105H	VNG_RS00410	hypothetical protein	VNG_RS00410		0.472607	-0.864199					0.718015
gene-VNG_0106G|VNG_0106G|rmeM	VNG_0106G	VNG_RS00415	SAM-dependent DNA methyl transferase	VNG_RS00415		-0.434284	0.336819				-0.226956	-0.500077
gene-VNG_0107G|VNG_0107G|rmeS	VNG_0107G	VNG_RS00420	restriction endonuclease subunitS	VNG_RS00420		0.165786	0.197728				0.855506	-0.843379
gene-VNG_0108G|VNG_0108G|rmeR	VNG_0108G	VNG_RS00425	typeIrestriction endonuclease subunitR	VNG_RS00425		0.604044	0.528118				0.614498	-0.494502
gene-VNG_0110a|VNG_0110a|VNG_0110a	VNG_0110a
gene-VNG_0110C|VNG_0110C|VNG_0110C	VNG_0110C	VNG_RS00430	M48 family metallopeptidase	VNG_RS00430		0.091785	0.305726				0.340933	-0.510804
gene-VNG_0113H|VNG_0113H|VNG_0113H	VNG_0113H	VNG_RS00450	helix-turn-helix domain -containing protein	VNG_RS00450		1.15068						0.98105
gene-VNG_0115G|VNG_0115G|VNG_0115G	VNG_0115G	VNG_RS00455	SDR family oxidoreductase	VNG_RS00455		-0.123944	-0.864199				-0.24403	1.02836
gene-VNG_0116a|VNG_0116a|VNG_0116a	VNG_0116a
gene-VNG_0116H|VNG_0116H|VNG_0116H	VNG_0116H	VNG_RS00470	hypothetical protein	VNG_RS00470
gene-VNG_0117H|VNG_0117H|VNG_0117H	VNG_0117H	VNG_RS00480	hypothetical protein	VNG_RS00480
gene-VNG_0118H|VNG_0118H|VNG_0118H	VNG_0118H	VNG_RS00485	hypothetical protein	VNG_RS00485		2.52919						0.774599
gene-VNG_0119H|VNG_0119H|VNG_0119H	VNG_0119H	VNG_RS14155	hypothetical protein	VNG_RS14155		-0.656676						-0.0189504
gene-VNG_0120H|VNG_0120H|VNG_0120H	VNG_0120H						1.68012					-1.66281
gene-VNG_0121H|VNG_0121H|VNG_0121H	VNG_0121H	VNG_RS00495	DUF192 domain -containing protein	VNG_RS00495		0.721835						1.55221
gene-VNG_0123G|VNG_0123G|VNG_0123G	VNG_0123G	VNG_RS00500	ABC transporter ATP-binding protein	VNG_RS00500		-0.341174	-0.732573				0.458171	-0.0227025
gene-VNG_0124C|VNG_0124C|cre1	VNG_0124C	VNG_RS00505	creatininase family protein	VNG_RS00505		0.273535	0.305726				0.492936	-0.481056
gene-VNG_0125H|VNG_0125H|VNG_0125H	VNG_0125H	VNG_RS00510	hypothetical protein	VNG_RS00510		-1.3777	-0.904841				0.533578	-0.962367
gene-VNG_0127C|VNG_0127C|mptD	VNG_0127C	VNG_RS00515	dihydroneopterinaldolase family protein	VNG_RS00515		0.565716	2.60612					-0.266878
gene-VNG_0128C|VNG_0128C|azf	VNG_0128C	VNG_RS00520	NAD(P)-dependentoxidoreductase	VNG_RS00520		-0.0717137	0.943155				-0.144494	-0.826305
gene-VNG_0129G|VNG_0129G|htpX	VNG_0129G	VNG_RS00525	M48 family metalloprotease	VNG_RS00525		-0.57548	-0.130845				-0.292886	-0.107679
gene-VNG_0130H|VNG_0130H|VNG_0130H	VNG_0130H	VNG_RS00530	hypothetical protein	VNG_RS00530		-1.41918	-0.949929				0.308018	-0.733196
gene-VNG_0132C|VNG_0132C|VNG_0132C	VNG_0132C	VNG_RS00535	hypothetical protein	VNG_RS00535		-0.129429	0.559827				-0.910029	0.264843
gene-VNG_0133G|VNG_0133G|rpa2	VNG_0133G	VNG_RS00545	single-strandedDNAbinding protein	VNG_RS00545		0.321349	1.19277				-0.663868	-0.163482
gene-VNG_0134G|VNG_0134G|hstA	VNG_0134G	VNG_RS00550	histone family protein	VNG_RS00550		0.0213957	-0.147042				-0.0773798	0.289888
gene-VNG_0136G|VNG_0136G|hda1	VNG_0136G	VNG_RS00555	histonedeacetyl ase	VNG_RS00555		-0.308753	-0.327296				0.359549	-0.296935
gene-VNG_0137a|VNG_0137a|VNG_0137a	VNG_0137a
gene-VNG_0137G|VNG_0137G|cca	VNG_0137G	VNG_RS00560	CCAtRNAnucleotidyl transferase	VNG_RS00560		0.873145	-0.09161				0.662861	0.345964
gene-VNG_0139H|VNG_0139H|VNG_0139H	VNG_0139H	VNG_RS13245	hypothetical protein	VNG_RS13245
gene-VNG_0141H|VNG_0141H|VNG_0141H	VNG_0141H	VNG_RS00585	hypothetical protein	VNG_RS00585		-0.656676						0.659121
gene-VNG_0142C|VNG_0142C|VNG_0142C	VNG_0142C	VNG_RS00590	MarR family transcriptional regulator	VNG_RS00590		0.869778	1.16555				-0.523006	0.271305
gene-VNG_0143H|VNG_0143H|VNG_0143H	VNG_0143H	VNG_RS13250				2.41371						0.436729
gene-VNG_0144H|VNG_0144H|VNG_0144H	VNG_0144H	VNG_RS00595	DUF302 domain -containing protein	VNG_RS00595		-2.17125	-0.931314				-0.00699048	-1.18888
gene-VNG_0146H|VNG_0146H|VNG_0146H	VNG_0146H	VNG_RS00600	hypothetical protein	VNG_RS00600		-0.308753	-1.29388				0.855506	0.173695
gene-VNG_0147C|VNG_0147C|VNG_0147C	VNG_0147C	VNG_RS00605	CopG family ribbon-helix-helix protein	VNG_RS00605		0.091785	0.860693					-0.843379
gene-VNG_0149G|VNG_0149G|cadA	VNG_0149G	VNG_RS00610	cation- translocatingP-typeATPase	VNG_RS00610		0.828751	1.00205					0.18519
gene-VNG_0150H|VNG_0150H|VNG_0150H	VNG_0150H	VNG_RS00615	cytochromecbiogenesis protein	VNG_RS00615
gene-VNG_0151C|VNG_0151C|trxA4	VNG_0151C	VNG_RS00620	TlpA family protein disulfide reductase	VNG_RS00620		-1.17125					-1.84493	0.552206
gene-VNG_0152G|VNG_0152G|VNG_0152G	VNG_0152G	VNG_RS00625	SCO family protein	VNG_RS00625		-0.711818	-0.449162				-0.0741047	-0.144481
gene-VNG_0153C|VNG_0153C|VNG_0153C	VNG_0153C	VNG_RS00630	rodshape-determining protein	VNG_RS00630		-0.835382	-2.01796		-1.02415		1.09974	0.1269
gene-VNG_0154G|VNG_0154G|VNG_0154G	VNG_0154G	VNG_RS00635	NAD(P)/FAD-dependent oxidoreductase	VNG_RS00635		-1.32325	-1.84826				0.11854	0.450535
gene-VNG_0156C|VNG_0156C|VNG_0156C	VNG_0156C	VNG_RS00640	helix-turn-helix domain -containing protein	VNG_RS00640		-0.400731	1.35819				-1.64699	-0.06786
gene-VNG_0157G|VNG_0157G|VNG_0157G	VNG_0157G	VNG_RS00645	MFS transporter	VNG_RS00645		2.82875						0.489196
gene-VNG_0158G|VNG_0158G|kdgK	VNG_0158G	VNG_RS00650	sugarkinase	VNG_RS00650		-1.49318	-0.00437716				-0.88146	-0.563271
gene-VNG_0159G|VNG_0159G|mutL	VNG_0159G	VNG_RS00655	DNAmismatch repair endonuclease MutL	mutL		-1.12234	-0.641807				-0.83255	0.396087
gene-VNG_0160a|VNG_0160a|VNG_0160a	VNG_0160a					-0.0337459	-0.0228972				0.75597	-0.722749
gene-VNG_0160G|VNG_0160G|boa1	VNG_0160G	VNG_RS00660	helix-turn-helix domain -containing protein	VNG_RS00660		-0.46343	-0.378773				0.855506	-0.896094
gene-VNG_0161G|VNG_0161G|gdhA3	VNG_0161G	VNG_RS00665	Glu/Leu/Phe/Valdehydrogenase	VNG_RS00665		-0.915611	-0.535305		-1.22095		0.591573	-0.92781
gene-VNG_0162G|VNG_0162G|acs4	VNG_0162G	VNG_RS00670	AMP-binding protein	VNG_RS00670		-0.455332	-0.460447		0.929791		1.07185	-1.02267
gene-VNG_0163G|VNG_0163G|mutS1b	VNG_0163G	VNG_RS00675	DNAmismatch repair protein MutS	mutS		-0.311427	-0.0838116				0.270543	-0.454089
gene-VNG_0164G|VNG_0164G|hypE2	VNG_0164G	VNG_RS00680	hydrogenaseexpression protein	VNG_RS00680			0.817625					-0.630385
gene-VNG_0166G|VNG_0166G|psmA	VNG_0166G	VNG_RS00685	archaeal proteasome endopeptidase complex subunit alpha	psmA		-0.221002	-0.310601				-0.0729407	0.206609
gene-VNG_0167H|VNG_0167H|trxA3	VNG_0167H	VNG_RS00690	thioredoxin family protein	VNG_RS00690		0.314177						0.466476
gene-VNG_0168H|VNG_0168H|rpoeps	VNG_0168H	VNG_RS00695	hypothetical protein	VNG_RS00695		1.05702	0.224926				-0.186314	1.06248
gene-VNG_0170C|VNG_0170C|VNG_0170C	VNG_0170C	VNG_RS00700	DsbA family protein	VNG_RS00700		1.15068	0.943155				-0.729457	0.98105
gene-VNG_0171C|VNG_0171C|nucS1	VNG_0171C	VNG_RS00705	endonuclease NucS	nucS
gene-VNG_0172G|VNG_0172G|mutS1a	VNG_0172G	VNG_RS00710	DNA mismatch repair protein MutS	mutS		0.150679	1.81762					-0.478382
gene-VNG_0174G|VNG_0174G|cat1	VNG_0174G	VNG_RS00715	aminoacidpermease	VNG_RS00715		-0.133775	1.42428				-0.392422	-1.12157
gene-VNG_0175G|VNG_0175G|trkA1	VNG_0175G	VNG_RS00720	TrkA family potassiumuptake protein	VNG_RS00720		0.454936	0.216174				0.331944	-0.0491124
gene-VNG_0176H|VNG_0176H|VNG_0176H	VNG_0176H	VNG_RS00725	GNAT family N-acetyl transferase	VNG_RS00725		0.477843	-2.40734				1.48354	1.44572
gene-VNG_0177G|VNG_0177G|rpl15e	VNG_0177G	VNG_RS00730	50Sribosomal protein L15e	VNG_RS00730		1.22523	1.37908		-1.81756		-0.281998	0.172213
gene-VNG_0178H|VNG_0178H|VNG_0178H	VNG_0178H	VNG_RS00735	restriction endonuclease	VNG_RS00735		-1.45302	-1.16537				-0.575128	0.331547
gene-VNG_0179C|VNG_0179C|rio2	VNG_0179C	VNG_RS00740	hypothetical protein	VNG_RS00740		0.0213957	-0.534892				0.748591	-0.148233
gene-VNG_0180G|VNG_0180G|hop	VNG_0180G	VNG_RS00745	bacteriorhodopsin	VNG_RS00745		-3.21078	-3.67743				1.0036	-0.492882
gene-VNG_0181G|VNG_0181G|lpl1	VNG_0181G	VNG_RS00750	lipoate-- protein ligase family protein	VNG_RS00750		-0.508284	-0.24949				0.270543	-0.485268
gene-VNG_0183G|VNG_0183G|apn1	VNG_0183G	VNG_RS00755	deoxyribonucleaseIV	VNG_RS00755		0.901159	0.998651				-0.144494	0.0910724
gene-VNG_0184H|VNG_0184H|VNG_0184H	VNG_0184H	VNG_RS00760	classISAM-dependentmethyl transferase	VNG_RS00760		-1.41918	-1.77931				0.0670101	0.337193
gene-VNG_0186G|VNG_0186G|pepB1	VNG_0186G	VNG_RS00765	aminopeptidase	VNG_RS00765		0.306072	1.25436				-0.646994	-0.257221
gene-VNG_0187H|VNG_0187H|VNG_0187H	VNG_0187H	VNG_RS00770	hypothetical protein	VNG_RS00770		-0.0932469	0.445656					-0.180414
gene-VNG_0188H|VNG_0188H|VNG_0188H	VNG_0188H	VNG_RS00775	MFS transporter	VNG_RS00775		-1.32325	-0.748722				0.340933	-0.871393
gene-VNG_0189C|VNG_0189C|VNG_0189C	VNG_0189C	VNG_RS00780	HD domain -containing protein	VNG_RS00780		1.49172	0.580585					0.0996941
gene-VNG_0190C|VNG_0190C|ncsA	VNG_0190C	VNG_RS00785	TIGR00269 family protein	VNG_RS00785			0.528118					-0.925841
gene-VNG_0192G|VNG_0192G|ftsZ2	VNG_0192G	VNG_RS00790	celldivision protein FtsZ	ftsZ		-1.98578	-1.4105				0.608575	-1.13978
gene-VNG_0194H|VNG_0194H|VNG_0194H	VNG_0194H	VNG_RS00795	typeIItoxin-antitoxinsystemParD family antitoxin	VNG_RS00795		-2.10484	-1.36485				0.478219	-1.17414
gene-VNG_0195H|VNG_0195H|VNG_0195H	VNG_0195H	VNG_RS00800	zincribbon domain -containing protein	VNG_RS00800		-2.66	-1.60228				-0.417512	-0.596136
gene-VNG_0197a|VNG_0197a|VNG_0197a	VNG_0197a					1.63611						1.46648
gene-VNG_0197C|VNG_0197C|VNG_0197C	VNG_0197C	VNG_RS00815	flippase-like domain -containing protein	VNG_RS00815		-0.334748	0.358193				-0.366886	-0.281985
gene-VNG_0198H|VNG_0198H|VNG_0198H	VNG_0198H	VNG_RS13255	hypothetical protein	VNG_RS13255
gene-VNG_0199H|VNG_0199H|VNG_0199H	VNG_0199H	VNG_RS00830	hypothetical protein	VNG_RS00830
gene-VNG_0200a|VNG_0200a|VNG_0200a	VNG_0200a
gene-VNG_0200C|VNG_0200C|VNG_0200C	VNG_0200C	VNG_RS00835	hypothetical protein	VNG_RS00835
gene-VNG_0204H|VNG_0204H|VNG_0204H	VNG_0204H	VNG_RS00845	hypothetical protein
gene-VNG_0207H|VNG_0207H|VNG_0207H	VNG_0207H	VNG_RS00860	hypothetical protein	VNG_RS00860		-1.94575	-0.997661		-1.3827		0.270543	-1.17457
gene-VNG_0208H|VNG_0208H|VNG_0208H	VNG_0208H	VNG_RS13260				-2.15438	-1.35672				0.533578	-1.28717
gene-VNG_0209H|VNG_0209H|VNG_0209H	VNG_0209H	VNG_RS00870	pseudo	VNG_RS00870		-1.98218	-0.641807				-4.90962	3.61332
gene-VNG_0214C|VNG_0214C|VNG_0214C	VNG_0214C	VNG_RS13925	hypothetical protein	VNG_RS13925		1.15068						0.396087
gene-VNG_0215C|VNG_0215C|VNG_0215C	VNG_0215C	VNG_RS00880	PriCT-2 domain -containing protein	VNG_RS00880		-0.00132442	-1.34635				1.31494	0.074159
gene-VNG_0216H|VNG_0216H|VNG_0216H	VNG_0216H	VNG_RS13930	hypothetical protein	VNG_RS13930
gene-VNG_0217H|VNG_0217H|VNG_0217H	VNG_0217H	VNG_RS00885	hypothetical protein	VNG_RS00885		1.87314						2.11855
gene-VNG_0218G|VNG_0218G|pilB2	VNG_0218G	VNG_RS00890	Flp pilus assembly complex ATPase component TadA	tadA
gene-VNG_0219H|VNG_0219H|VNG_0219H	VNG_0219H	VNG_RS00895	DUF4129 domain -containing protein	VNG_RS00895		-3.03632	-1.31988				-0.00956442	-1.66281
gene-VNG_0220H|VNG_0220H|VNG_0220H	VNG_0220H	VNG_RS00900	hypothetical protein	VNG_RS00900		-3.25871	-1.92191				-0.144494	-1.14823
gene-VNG_0222a|VNG_0222a|VNG_0222a	VNG_0222a
gene-VNG_0222C|VNG_0222C|VNG_0222C	VNG_0222C	VNG_RS00905	DUF58 domain -containing protein	VNG_RS00905		-2.41918	-1.24127				0.251435	-1.38527
gene-VNG_0223G|VNG_0223G|moxR	VNG_0223G	VNG_RS00915	AAA family ATPase	VNG_RS00915		0.150679	0.0462489				0.703503	-0.555003
gene-VNG_0226G|VNG_0226G|degP	VNG_0226G	VNG_RS00925	trypsin-likepeptidase domain -containing protein	VNG_RS00925		-0.0263758	-0.523163				-0.164958	0.705815
gene-VNG_0227H|VNG_0227H|VNG_0227H	VNG_0227H	VNG_RS00930	DUF192 domain -containing protein	VNG_RS00930		-1.96266	-2.11129				0.533578	-0.340879
gene-VNG_0228G|VNG_0228G|guaAa1	VNG_0228G	VNG_RS00935	GMPsynthasesubunitA	VNG_RS00935		0.676747	0.417087				0.11854	0.18519
gene-VNG_0230C|VNG_0230C|VNG_0230C	VNG_0230C	VNG_RS00940	DUF2070 family protein	VNG_RS00940		1.74932	0.723842				0.163628	0.905915
gene-VNG_0231C|VNG_0231C|VNG_0231C	VNG_0231C	VNG_RS00945	MBLfoldmetallo-hydrolase	VNG_RS00945		-1.40571	-1.43827				-0.00699048	0.0836193
gene-VNG_0233H|VNG_0233H|VNG_0233H	VNG_0233H	VNG_RS00950	DUF3194 domain -containing protein	VNG_RS00950		-0.841101	-1.08238				-0.0258495	0.311198
gene-VNG_0234a|VNG_0234a|pcc1	VNG_0234a
gene-VNG_0234C|VNG_0234C|pfdB	VNG_0234C	VNG_RS00955	prefoldinsubunitbeta	VNG_RS00955		-1.33898	-0.981883		-0.868279		0.14181	-0.454835
gene-VNG_0237H|VNG_0237H|rpoP	VNG_0237H	VNG_RS00965	DNA-directedRNApolymerasesubunitP	VNG_RS00965		-1.10712	0.559827				-1.282	-0.340879
gene-VNG_0238H|VNG_0238H|VNG_0238H	VNG_0238H	VNG_RS00975	hypothetical protein	VNG_RS00975
gene-VNG_0239C|VNG_0239C|rpl43e	VNG_0239C	VNG_RS00970	50Sribosomal protein L37ae	VNG_RS00970		-0.681444	0.144789				-0.377155	-0.405009
gene-VNG_0240C|VNG_0240C|VNG_0240C	VNG_0240C	VNG_RS00980	DUF2103 domain -containing protein	VNG_RS00980		0.782947	-0.834452					0.805963
gene-VNG_0243a|VNG_0243a|pth	VNG_0243a	VNG_RS00990	peptidyl-tRNA hydrolase Pth2	VNG_RS00990
gene-VNG_0243C|VNG_0243C|truD	VNG_0243C	VNG_RS00985	tRNApseudouridine(13)synthaseTruD	truD		0.485863	1.94316				-1.84493	0.431711
gene-VNG_0244H|VNG_0244H|VNG_0244H	VNG_0244H	VNG_RS00995	YIP1 family protein	VNG_RS00995		-0.171249						0.881514
gene-VNG_0245G|VNG_0245G|dcd	VNG_0245G	VNG_RS01000	dCTPdeaminase	VNG_RS01000		-0.416362	0.0744				-0.337139	-0.109553
gene-VNG_0247C|VNG_0247C|thiR	VNG_0247C	VNG_RS01005	helix-turn-helix domain -containing protein	VNG_RS01005		-0.171249	-0.3523				0.025431	0.19969
gene-VNG_0248C|VNG_0248C|VNG_0248C	VNG_0248C	VNG_RS01010	hypothetical protein	VNG_RS01010		1.70322	0.216174					-0.739428
gene-VNG_0249G|VNG_0249G|hcpG	VNG_0249G	VNG_RS01015	DUF5059 domain -containing protein	VNG_RS01015		2.90557	0.900087				1.94297	0.10658
gene-VNG_0250C|VNG_0250C|VNG_0250C	VNG_0250C	VNG_RS01020	phosphopantothenate/pantothenatesynthetase	VNG_RS01020		-0.434284	1.00205				-1.31442	-0.0778441
gene-VNG_0251C|VNG_0251C|VNG_0251C	VNG_0251C	VNG_RS01025	sugarkinase	VNG_RS01025		0.594285	0.165548					-0.0607706
gene-VNG_0252C|VNG_0252C|pcrB1	VNG_0252C	VNG_RS01030	putativephosphoglycerolgeranyl geranyl transferase	VNG_RS01030		1.31814	0.199495				0.740029	0.422681
gene-VNG_0254G|VNG_0254G|tfbG	VNG_0254G	VNG_RS01035	transcriptioninitiationfactorIIB	VNG_RS01035		-1.12041	-1.72124				0.581473	0.0634253
gene-VNG_0255C|VNG_0255C|rnhA2	VNG_0255C	VNG_RS01040	ribonucleaseHI family protein	VNG_RS01040			-0.941367					-1.45636
gene-VNG_0256H|VNG_0256H|VNG_0256H	VNG_0256H	VNG_RS01045	hypothetical protein	VNG_RS01045								-0.80031
gene-VNG_0258H|VNG_0258H|rosR	VNG_0258H	VNG_RS01050	helix-turn-helix transcriptionalregulator	VNG_RS01050		-2.82006	-1.95386				0.190284	-1.01241
gene-VNG_0259G|VNG_0259G|ipp	VNG_0259G	VNG_RS01055	inorganicdiphosphatase	VNG_RS01055		-0.661388	0.704643		-0.429926		-0.538773	-0.783189
gene-VNG_0261H|VNG_0261H|VNG_0261H	VNG_0261H					0.759488	-2.17232				1.55595	1.41993
gene-VNG_0262C|VNG_0262C|VNG_0262C	VNG_0262C	VNG_RS01060	bifunctionaloligoribonuclease/PAPphosphataseNrnA	VNG_RS01060		0.00400903	-1.35453				-0.168742	1.57135
gene-VNG_0264H|VNG_0264H|VNG_0264H	VNG_0264H	VNG_RS01065	alkalinephosphatase family protein	VNG_RS01065		-0.520995	-0.71052				0.111846	0.121748
gene-VNG_0265G|VNG_0265G|cetZ2	VNG_0265G	VNG_RS01070	celldivision protein	VNG_RS01070		-2.13172	-2.45336				0.111846	0.253865
gene-VNG_0266H|VNG_0266H|VNG_0266H	VNG_0266H	VNG_RS01075	hypothetical protein	VNG_RS01075		0.70322	2.11308					-0.0513719
gene-VNG_0267H|VNG_0267H|VNG_0267H	VNG_0267H	VNG_RS01080	SDR family oxidoreductase	VNG_RS01080		1.10886	1.68012					0.424656
gene-VNG_0268C|VNG_0268C|VNG_0268C	VNG_0268C	VNG_RS01085	aldo/ketoreductase	VNG_RS01085		0.413713	1.4957				-1.21488	0.17697
gene-VNG_0270C|VNG_0270C|VNG_0270C	VNG_0270C	VNG_RS01090	MFS transporter	VNG_RS01090		0.998676	0.902513				-0.366886	0.507118
gene-VNG_0271C|VNG_0271C|gtl5	VNG_0271C	VNG_RS01095	glycosyl transferase family 2	VNG_RS01095		0.314177						1.14455
gene-VNG_0272H|VNG_0272H|VNG_0272H	VNG_0272H	VNG_RS01100	hypothetical protein	VNG_RS01100
gene-VNG_0274C|VNG_0274C|VNG_0274C	VNG_0274C	VNG_RS01105	CoApyrophosphatase	VNG_RS01105		1.01095	-0.0317536				0.402994	0.683784
gene-VNG_0277a|VNG_0277a|VNG_0277a	VNG_0277a					2.51432	1.05863				0.270543	1.22921
gene-VNG_0277G|VNG_0277G|VNG_0277G	VNG_0277G	VNG_RS01110	FAD-dependentoxidoreductase	VNG_RS01110		0.344339	0.00589118				-0.387351	0.769869
gene-VNG_0280a|VNG_0280a|VNG_0280a	VNG_0280a
gene-VNG_0280H|VNG_0280H|VNG_0280H	VNG_0280H	VNG_RS01115	LLM class flavin-dependent oxidoreductase	VNG_RS01115		1.87938	1.48748					0.387819
gene-VNG_0281G|VNG_0281G|VNG_0281G	VNG_0281G	VNG_RS01120	FAD-bindingoxidoreductase	VNG_RS01120		1.78295	1.94316					1.02836
gene-VNG_0282a|VNG_0282a|VNG_0282a	VNG_0282a					-0.341174	0.791152					-1.09577
gene-VNG_0282H|VNG_0282H|VNG_0282H	VNG_0282H	VNG_RS14160	hypothetical protein	VNG_RS14160
gene-VNG_0283C|VNG_0283C|hsp20D	VNG_0283C	VNG_RS01125	Hsp20/alphacrystallin family protein	VNG_RS01125		-0.415486	-1.48569				0.0540517	1.06022
gene-VNG_0284C|VNG_0284C|VNG_0284C	VNG_0284C	VNG_RS01135	radicalSAM protein	VNG_RS01135		-0.0837866	0.47367				-0.559532	0.0461446
gene-VNG_0287a|VNG_0287a|VNG_0287a	VNG_0287a					-1.20872	-0.733438		-0.550254		0.00750909	-0.438726
gene-VNG_0289H|VNG_0289H|VNG_0289H	VNG_0289H	VNG_RS01155	YkgJ family cysteinecluster protein	VNG_RS01155		1.74302	1.60612				-0.844934	1.0259
gene-VNG_0291H|VNG_0291H|VNG_0291H	VNG_0291H	VNG_RS01160	MBLfoldmetallo-hydrolase	VNG_RS01160		2.27855	-0.272573				1.08292	1.51228
gene-VNG_0293H|VNG_0293H|VNG_0293H	VNG_0293H	VNG_RS01165	MarR family transcriptionalregulator	VNG_RS01165		1.02951	-1.03037				0.855506	1.24845
gene-VNG_0294G|VNG_0294G|VNG_0294G	VNG_0294G	VNG_RS01170	classISAM-dependentmethyl transferase	VNG_RS01170		-2.17125	-0.641807				-0.659067	-0.826305
gene-VNG_0296H|VNG_0296H|gtl4	VNG_0296H	VNG_RS01175	glycosyl transferase	VNG_RS01175		-2.2257	0.194694				-1.09203	-1.28429
gene-VNG_0297H|VNG_0297H|VNG_0297H	VNG_0297H	VNG_RS01180	amidohydrolase family protein	VNG_RS01180		-0.47081	2.44566					-0.727902
gene-VNG_0298H|VNG_0298H|VNG_0298H	VNG_0298H	VNG_RS01185	TRICcationchannel family protein	VNG_RS01185
gene-VNG_0300C|VNG_0300C|VNG_0300C	VNG_0300C	VNG_RS01190	S-adenosyl -l-methioninehydroxideadenosyl transferase family protein	VNG_RS01190
gene-VNG_0301C|VNG_0301C|nadM	VNG_0301C	VNG_RS01195	nicotinamide-nucleotideadenyl yl transferase	VNG_RS01195			2.26508					-1.66281
gene-VNG_0303G|VNG_0303G|lon	VNG_0303G	VNG_RS01200	ATP-dependentproteaseLonB	lonB		0.904789	-0.55217		-0.42585		0.567552	0.933476
gene-VNG_0305G|VNG_0305G|trpC	VNG_0305G	VNG_RS01210	indole-3-glycerol-phosphatesynthase	VNG_RS01210
gene-VNG_0306C|VNG_0306C|ogt	VNG_0306C	VNG_RS01205	methyl ated-DNA--[ protein ]-cysteineS-methyl transferase	VNG_RS01205
gene-VNG_0307G|VNG_0307G|trpB	VNG_0307G	VNG_RS01215	tryptophansynthasesubunitbeta	trpB		1.99868	0.47367					0.713569
gene-VNG_0308G|VNG_0308G|trpA	VNG_0308G	VNG_RS01220	tryptophansynthasesubunitalpha	VNG_RS01220
gene-VNG_0309C|VNG_0309C|fba2	VNG_0309C	VNG_RS01225	fructose-bisphosphatealdolase	VNG_RS01225		3.67842	1.23266				1.44047	1.04936
gene-VNG_0310C|VNG_0310C|aroB	VNG_0310C	VNG_RS01235	3-dehydroquinatesynthaseII	VNG_RS01235		1.59205	0.973852				-0.438225	1.10049
gene-VNG_0311H|VNG_0311H|VNG_0311H	VNG_0311H	VNG_RS01230	hypothetical protein	VNG_RS01230		-0.171249	1.60612				-1.46642	-0.266878
gene-VNG_0312H|VNG_0312H|VNG_0312H	VNG_0312H	VNG_RS01240	zincribbon domain -containing protein	VNG_RS01240		-1.14268	-0.197022				-0.618425	-0.283163
gene-VNG_0314G|VNG_0314G|aroD	VNG_0314G	VNG_RS01245	typeI3-dehydroquinatedehydratase	VNG_RS01245		0.868279	2.60612					-0.379353
gene-VNG_0315G|VNG_0315G|tfbF	VNG_0315G	VNG_RS01250	transcriptioninitiationfactorIIB	VNG_RS01250		0.491716	1.41709				-0.772525	-0.108776
gene-VNG_0316C|VNG_0316C|VNG_0316C	VNG_0316C	VNG_RS01255	cobalamin-binding protein	VNG_RS01255		-1.06433	-1.05684				0.155066	-0.118486
gene-VNG_0318G|VNG_0318G|aglD	VNG_0318G	VNG_RS01260	flippase-like domain -containing protein	VNG_RS01260		0.182388	0.358193				-0.144494	0.0127585
gene-VNG_0319H|VNG_0319H|VNG_0319H	VNG_0319H	VNG_RS01265	hypothetical protein	VNG_RS01265		1.95803						2.20344
gene-VNG_0320H|VNG_0320H|VNG_0320H	VNG_0320H	VNG_RS01270	wingedhelix-turn-helix transcriptionalregulator	VNG_RS01270		-0.631884	-0.281911				-0.466422	0.160519
gene-VNG_0321G|VNG_0321G|VNG_0321G	VNG_0321G	VNG_RS01275	SPFH/Band7/PHB domain protein	VNG_RS01275		-1.52312	-1.60238				0.525605	-0.402279
gene-VNG_0322H|VNG_0322H|VNG_0322H	VNG_0322H	VNG_RS01280	NfeD family protein	VNG_RS01280		-0.926137	-1.00954				-0.577453	0.704925
gene-VNG_0323H|VNG_0323H|VNG_0323H	VNG_0323H	VNG_RS14165	hypothetical protein	VNG_RS14165		-1.08379	-1.77931				0.314938	0.424656
gene-VNG_0324G|VNG_0324G|pykA	VNG_0324G	VNG_RS01285	pyruvatekinase	pyk		-1.33171	-1.35801				-0.453822	0.524192
gene-VNG_0326G|VNG_0326G|metS	VNG_0326G	VNG_RS01290	methionine--tRNAligase	metG		-0.887943	-0.557743		0.493032		-0.228558	-0.0575717
gene-VNG_0327G|VNG_0327G|panD	VNG_0327G	VNG_RS01295	tyrosinedecarboxyl aseMfnA	mfnA		-0.705586	-0.516276				-0.0773798	-0.06786
gene-VNG_0329G|VNG_0329G|VNG_0329G	VNG_0329G	VNG_RS01300	M48 family metallopeptidase	VNG_RS01300		0.00138997	0.00204911				0.294791	-0.25138
gene-VNG_0330G|VNG_0330G|ppsA	VNG_0330G	VNG_RS01305	pyruvate,waterdikinase	ppsA		-0.657478	-0.144132		-0.784881		0.202857	-0.672132
gene-VNG_0331H|VNG_0331H|VNG_0331H	VNG_0331H	VNG_RS01310	hypothetical protein	VNG_RS01310		0.916213	0.680121					0.424656
gene-VNG_0332C|VNG_0332C|phzF1	VNG_0332C	VNG_RS01315	PhzF family phenazinebiosynthesis protein	VNG_RS01315		-0.0717137	0.232662					0.10658
gene-VNG_0335G|VNG_0335G|gptA1	VNG_0335G	VNG_RS01320	phosphoribosyl transferase	VNG_RS01320		-0.600093	0.135801				-0.466422	-0.225401
gene-VNG_0339H|VNG_0339H|VNG_0339H	VNG_0339H	VNG_RS01340	hypothetical protein	VNG_RS01340		0.565716	-2.05684				0.685581	1.98105
gene-VNG_0340C|VNG_0340C|scpA	VNG_0340C	VNG_RS01345	segregation/condensation protein A	VNG_RS01345		-1.54322	-1.18238				0.396074	-0.712847
gene-VNG_0342G|VNG_0342G|smc	VNG_0342G	VNG_RS01350	chromosomesegregation protein SMC	smc		-1.41322	-1.18238				0.0899713	-0.276748
gene-VNG_0343H|VNG_0343H|VNG_0343H	VNG_0343H	VNG_RS01355	hypothetical protein	VNG_RS01355		-2.70967	-1.14995				-0.0752313	-1.44041
gene-VNG_0345G|VNG_0345G|gatB	VNG_0345G	VNG_RS01360	Asp-tRNA(Asn)/Glu-tRNA(Gln)amido transferasesubunitGatB	gatB		0.079294	0.740663				-0.780083	0.162784
gene-VNG_0346H|VNG_0346H|VNG_0346H	VNG_0346H	VNG_RS01365	hypothetical protein	VNG_RS01365		0.551217	-0.419415				0.703503	0.311198
gene-VNG_0347H|VNG_0347H|VNG_0347H	VNG_0347H	VNG_RS01370	hypothetical protein	VNG_RS01370		0.288182	0.580585					0.311198
gene-VNG_0349G|VNG_0349G|topA	VNG_0349G	VNG_RS01375	DNAtopoisomeraseI	VNG_RS01375		1.70455	0.472592				-0.0800453	1.35607
gene-VNG_0351C|VNG_0351C|nreA	VNG_0351C	VNG_RS01380	hypothetical protein	VNG_RS01380		1.55667	0.943155				-0.444054	1.10164
gene-VNG_0352H|VNG_0352H|VNG_0352H	VNG_0352H	VNG_RS01385	hypothetical protein	VNG_RS01385		-1.34813	-2.05684				0.155066	0.597721
gene-VNG_0354C|VNG_0354C|VNG_0354C	VNG_0354C	VNG_RS01390	CPBP family intramembranemetalloprotease	VNG_RS01390		-0.485358	-1.55934				0.419407	0.69865
gene-VNG_0355G|VNG_0355G|mpcT	VNG_0355G	VNG_RS01395	HAMP domain -containing protein	VNG_RS01395		-3.0245	-3.01502				-0.00831587	0.0429081
gene-VNG_0357a|VNG_0357a|VNG_0357a	VNG_0357a					-0.549761	3.00205				-2.84493	-0.662807
gene-VNG_0357H|VNG_0357H|VNG_0357H	VNG_0357H	VNG_RS01400	hypothetical protein	VNG_RS01400
gene-VNG_0359C|VNG_0359C|VNG_0359C	VNG_0359C	VNG_RS01405	hypothetical protein	VNG_RS01405		-1.15531	-1.05684				-0.38842	0.334026
gene-VNG_0360C|VNG_0360C|VNG_0360C	VNG_0360C	VNG_RS01410	hypothetical protein	VNG_RS01410		0.876056	-0.336952				0.0360782	1.221
gene-VNG_0361C|VNG_0361C|VNG_0361C	VNG_0361C	VNG_RS01415	rhomboid family intramembraneserineprotease	VNG_RS01415		0.655914	0.165548				0.0712347	0.463201
gene-VNG_0363G|VNG_0363G|nfi	VNG_0363G	VNG_RS01420	endonuclease V	VNG_RS01420		0.808573	0.417087				-0.729457	1.16501
gene-VNG_0364G|VNG_0364G|VNG_0364G	VNG_0364G	VNG_RS01425	SDR family oxidoreductase	VNG_RS01425		0.343324	0.614533				-0.366886	0.139747
gene-VNG_0365G|VNG_0365G|arsA2	VNG_0365G	VNG_RS01430	ArsA family ATPase	VNG_RS01430		-2.17125	0.408819				-0.659067	-1.87693
gene-VNG_0367H|VNG_0367H|VNG_0367H	VNG_0367H	VNG_RS01435	nuclear transportfactor2 family protein	VNG_RS01435		0.828751	-0.182375					0.19969
gene-VNG_0368a|VNG_0368a|VNG_0368a	VNG_0368a	VNG_RS01445	metal-dependent hydrolase	VNG_RS01445		0.032284	-0.308383				0.454968	-0.0702309
gene-VNG_0368C|VNG_0368C|VNG_0368C	VNG_0368C	VNG_RS01440	CinA family protein	VNG_RS01440		-0.154176	0.258657				-0.629921	0.261158
gene-VNG_0370H|VNG_0370H|VNG_0370H	VNG_0370H	VNG_RS01450	PHP domain-containing protein	VNG_RS01450		-1.32325	-0.0568446				-0.350945	-0.871393
gene-VNG_0371G|VNG_0371G|acd1	VNG_0371G	VNG_RS01455	acyl -CoAdehydrogenase	VNG_RS01455		0.544958	-0.0216551				0.803039	-0.192356
gene-VNG_0373H|VNG_0373H|VNG_0373H	VNG_0373H	VNG_RS01460	hypothetical protein	VNG_RS01460		0.0131752	0.105427				-0.381533	0.333351
gene-VNG_0374G|VNG_0374G|spt5	VNG_0374G	VNG_RS01465	transcriptionelongationfactorSpt5	VNG_RS01465		-0.205197	-1.31988				0.236596	0.922156
gene-VNG_0375G|VNG_0375G|secE	VNG_0375G	VNG_RS01470	protein translocaseSEC61complexsubunitgamma	VNG_RS01470		2.35231						1.18268
gene-VNG_0376G|VNG_0376G|ftsZ1	VNG_0376G	VNG_RS01475	celldivision protein FtsZ	ftsZ		-0.201411	-0.53106				0.230186	0.143533
gene-VNG_0378C|VNG_0378C|dtdA	VNG_0378C	VNG_RS01480	D-tyrosyl -tRNA(Tyr)deacyl ase	VNG_RS01480		-0.112356	1.47367				-1.14449	-0.397462
gene-VNG_0380G|VNG_0380G|VNG_0380G	VNG_0380G	VNG_RS01485	calcium/sodiumantiporter	VNG_RS01485		-1.04572	-0.24949				0.396074	-1.14823
gene-VNG_0382G|VNG_0382G|aroE	VNG_0382G	VNG_RS01490	shikimatedehydrogenase	VNG_RS01490		0.182388	-0.440173				0.00750909	0.659121
gene-VNG_0383H|VNG_0383H|VNG_0383H	VNG_0383H	VNG_RS01495	hypothetical protein	VNG_RS01495		-0.682502	-0.361699				-0.706373	0.42964
gene-VNG_0384G|VNG_0384G|pabB	VNG_0384G	VNG_RS01500	aminodeoxychorismatesynthase,componentI	pabB		-0.386978	-0.396695				-0.144494	0.19828
gene-VNG_0386G|VNG_0386G|pabA	VNG_0386G	VNG_RS01505	aminodeoxychorismate/anthranilate synthase component II	VNG_RS01505		0.051143	-0.182375				0.0481511	0.229437
gene-VNG_0387G|VNG_0387G|pabC	VNG_0387G	VNG_RS01510	aminodeoxychorismatelyase	VNG_RS01510		0.998676	0.312389					-0.12515
gene-VNG_0388C|VNG_0388C|VNG_0388C	VNG_0388C	VNG_RS01515	Rieske(2Fe-2S) protein	VNG_RS01515		0.776283	-0.201234					0.166081
gene-VNG_0389C|VNG_0389C|VNG_0389C	VNG_0389C	VNG_RS01520	transcriptionalregulator	VNG_RS01520		1.33125						1.16162
gene-VNG_0390G|VNG_0390G|graD1	VNG_0390G	VNG_RS01525	NDP-sugarsynthase	VNG_RS01525		0.229289	0.990461				-0.466422	-0.250681
gene-VNG_0391C|VNG_0391C|dph6	VNG_0391C	VNG_RS01530	diphthine--ammonialigase	VNG_RS01530		1.99868	2.68012					0.507118
gene-VNG_0393C|VNG_0393C|VNG_0393C	VNG_0393C	VNG_RS01535	DUF373 family protein	VNG_RS01535		0.175201	-1.5043				0.633114	1.09046
gene-VNG_0394C|VNG_0394C|VNG_0394C	VNG_0394C	VNG_RS01540	coiled-coil protein	VNG_RS01540		-0.0563217	-1.21006		-0.739372		0.749964	0.447842
gene-VNG_0396C|VNG_0396C|VNG_0396C	VNG_0396C	VNG_RS01545	DUF371 domain -containing protein	VNG_RS01545
gene-VNG_0398G|VNG_0398G|nthB	VNG_0398G	VNG_RS01550	endonuclease III	VNG_RS01550		-1.46076					-1.01896
gene-VNG_0399H|VNG_0399H|VNG_0399H	VNG_0399H	VNG_RS01555	hypothetical protein	VNG_RS01555		-0.209217	-0.561637				-0.281998	0.678487
gene-VNG_0401a|VNG_0401a|VNG_0401a	VNG_0401a
gene-VNG_0401G|VNG_0401G|VNG_0401G	VNG_0401G	VNG_RS01560	beta-CASPribonucleaseaCPSF1	VNG_RS01560		0.941125	-0.48916		0.470719		0.179045	1.29531
gene-VNG_0402H|VNG_0402H|VNG_0402H	VNG_0402H	VNG_RS14170	hypothetical protein	VNG_RS14170		0.0753905	-1.1342				1.3479	-0.0942385
gene-VNG_0403G|VNG_0403G|proS	VNG_0403G	VNG_RS01565	proline--tRNAligase	VNG_RS01565		0.000703263	0.898761				-0.403881	-0.450108
gene-VNG_0404H|VNG_0404H|VNG_0404H	VNG_0404H	VNG_RS01570	hypothetical protein	VNG_RS01570		-0.41741	-0.788648				0.137277	0.278031
gene-VNG_0405C|VNG_0405C|VNG_0405C	VNG_0405C	VNG_RS01575	SDR family oxidoreductase	VNG_RS01575		-0.23265	-0.0568446				-0.407528	0.275793
gene-VNG_0406C|VNG_0406C|gldA2	VNG_0406C	VNG_RS01580	NAD(P)-dependentglycerol-1-phosphatedehydrogenase	VNG_RS01580		-3.23014	-1.4898				-0.618425	-1.07784
gene-VNG_0407H|VNG_0407H|VNG_0407H	VNG_0407H	VNG_RS01585	flippase-like domain -containing protein	VNG_RS01585		-0.959745	0.0211579				-0.807459	-0.129374
gene-VNG_0408H|VNG_0408H|VNG_0408H	VNG_0408H	VNG_RS01590	M48 family metalloprotease	VNG_RS01590		-0.171249						1.14455
gene-VNG_0409C|VNG_0409C|VNG_0409C	VNG_0409C	VNG_RS01595	S9 family peptidase	VNG_RS01595		-0.0515102	-0.0838116				0.324991	-0.24862
gene-VNG_0410G|VNG_0410G|gth3	VNG_0410G	VNG_RS01600	glycosyl transferase	VNG_RS01600		-1.37374	0.119582				-0.179259	-1.27
gene-VNG_0412G|VNG_0412G|folCP	VNG_0412G	VNG_RS01605	dihydropteroatesynthase	folP		0.0657898	-0.218596				-0.0773798	0.405835
gene-VNG_0414G|VNG_0414G|purNH	VNG_0414G	VNG_RS01610	phosphoribosyl glycinamideformyl transferase	VNG_RS01610		-0.437529	-0.554344				-0.620227	0.781112
gene-VNG_0415G|VNG_0415G|purB	VNG_0415G	VNG_RS01615	adenyl osuccinatelyase	purB		-1.06937	-0.974382				-0.414583	0.363666
gene-VNG_0417H|VNG_0417H|VNG_0417H	VNG_0417H	VNG_RS01620	metallophosphoesterase	VNG_RS01620		0.386746	0.872766				-0.507064	0.0651139
gene-VNG_0419C|VNG_0419C|VNG_0419C	VNG_0419C	VNG_RS01625	NYN domain -containing protein	VNG_RS01625		0.390629	0.537517				-0.449349	0.346531
gene-VNG_0420H|VNG_0420H|VNG_0420H	VNG_0420H	VNG_RS01630	hypothetical protein	VNG_RS01630		-0.0717137						0.758657
gene-VNG_0421C|VNG_0421C|VNG_0421C	VNG_0421C	VNG_RS01635	hypothetical protein	VNG_RS01635		-0.479372	1.94316				-2.84493	0.466476
gene-VNG_0422G|VNG_0422G|cyc	VNG_0422G	VNG_RS01640	cytochromeP450	VNG_RS01640		0.603684	-0.108375				-0.38842	1.14455
gene-VNG_0424C|VNG_0424C|nac	VNG_0424C	VNG_RS01645	nascentpolypeptide-associatedcomplex protein	VNG_RS01645		0.174525	0.39214				-0.337139	0.163594
gene-VNG_0425G|VNG_0425G|trmI	VNG_0425G	VNG_RS01650	methyl transferase domain -containing protein	VNG_RS01650		0.690044	0.265084				0.270543	0.198487
gene-VNG_0426G|VNG_0426G|tfs1	VNG_0426G	VNG_RS01655	transcriptionfactorS	VNG_RS01655		1.02515	0.408819				0.0778984	0.5825
gene-VNG_0427G|VNG_0427G|VNG_0427G	VNG_0427G	VNG_RS01660	MFS transporter	VNG_RS01660		0.343324	1.68012					0.659121
gene-VNG_0428G|VNG_0428G|fadA2	VNG_0428G	VNG_RS01665	enoyl -CoAhydratase/isomerase family protein	VNG_RS01665		-0.323253	-0.757284		0.356707		-0.0879105	0.566012
gene-VNG_0429H|VNG_0429H|VNG_0429H	VNG_0429H	VNG_RS01670	hypothetical protein	VNG_RS01670		-0.623762	2.60612				-2.84493	-0.340879
gene-VNG_0430H|VNG_0430H|VNG_0430H	VNG_0430H	VNG_RS01675	hypothetical protein	VNG_RS01675		1.1863	0.943155					0.431711
gene-VNG_0431G|VNG_0431G|VNG_0431G	VNG_0431G	VNG_RS01680	NUDIX domain -containing protein	VNG_RS01680		1.69817	1.02804				-0.385502	1.09969
gene-VNG_0433C|VNG_0433C|rps10b	VNG_0433C	VNG_RS01685	hypothetical protein	VNG_RS01685		-0.370153	0.972903				-0.603926	-0.695061
gene-VNG_0435H|VNG_0435H|VNG_0435H	VNG_0435H	VNG_RS01690	hypothetical protein	VNG_RS01690		0.636106	-0.834452		-1.4387			0.244084
gene-VNG_0436G|VNG_0436G|nhaC1	VNG_0436G	VNG_RS01695	Na+/H+antiporterNhaC family protein	VNG_RS01695		0.513249	-0.695578				0.405703	0.847194
gene-VNG_0437C|VNG_0437C|VNG_0437C	VNG_0437C	VNG_RS01700	M20 family metallo-hydrolase	VNG_RS01700		-2.39364	-2.90484				0.0481511
gene-VNG_0438G|VNG_0438G|fer3	VNG_0438G	VNG_RS01710	2Fe-2Siron-sulfurclusterbinding domain -containing protein	VNG_RS01710		-0.656676	-1.11129				0.218076	0.28061
gene-VNG_0439C|VNG_0439C|VNG_0439C	VNG_0439C	VNG_RS01705	geranyl geranyl reductase family protein	VNG_RS01705		-0.62038	0.618316				-0.484918	-0.709708
gene-VNG_0440C|VNG_0440C|VNG_0440C	VNG_0440C	VNG_RS01715	MBLfoldmetallo-hydrolase	VNG_RS01715		0.713273	0.123728				-0.523006	1.15662
gene-VNG_0441H|VNG_0441H|VNG_0441H	VNG_0441H	VNG_RS01720	hypothetical protein	VNG_RS01720		0.76735	2.35819					0.182683
gene-VNG_0442G|VNG_0442G|gnaD	VNG_0442G	VNG_RS01725	mandelateracemase/muconatelactonizingenzyme family protein	VNG_RS01725		0.868279	1.28103				-0.314419	-0.0542573
gene-VNG_0444G|VNG_0444G|kdgA	VNG_0444G	VNG_RS01730	dihydrodipicolinatesynthase family protein	VNG_RS01730		0.281263	-0.368789				0.192541	0.50158
gene-VNG_0446G|VNG_0446G|gdh	VNG_0446G	VNG_RS01740	glucose1-dehydrogenase	VNG_RS01740		-1.84932	-0.504304				-0.822566	-0.478382
gene-VNG_0447H|VNG_0447H|VNG_0447H	VNG_0447H	VNG_RS01735	HADhydrolase family protein	VNG_RS01735		-3.17125	-2.24949				-0.231957	-0.645733
gene-VNG_0448G|VNG_0448G|pyrE1	VNG_0448G	VNG_RS01745	orotatephosphoribosyl transferase-like protein	VNG_RS01745		0.180223	-0.275025				0.245453	0.253865
gene-VNG_0450C|VNG_0450C|grx4	VNG_0450C	VNG_RS01750	glutaredoxin	VNG_RS01750		1.05114	0.165548				0.0481511	0.881514
gene-VNG_0451G|VNG_0451G|phoU2	VNG_0451G	VNG_RS01755	phosphatesignalingcomplex protein PhoU	phoU		-2.05577	-2.57907				1.17743	-0.610065
gene-VNG_0452G|VNG_0452G|pstB2	VNG_0452G	VNG_RS01760	phosphateABC transporter ATP-binding protein	VNG_RS01760		-2.08198	-3.04898				1.23165	-0.220584
gene-VNG_0453G|VNG_0453G|pstA2	VNG_0453G	VNG_RS01765	phosphateABC transporter permeasePstA	pstA		-2.72145	-2.93842				0.73317	-0.472123
gene-VNG_0455G|VNG_0455G|pstC2	VNG_0455G	VNG_RS01770	phosphateABC transporter permeasesubunitPstC	pstC		-1.82777	-2.62731				0.945704	-0.102092
gene-VNG_0457G|VNG_0457G|pstS2	VNG_0457G	VNG_RS01775	PstS family phosphateABC transporter substrate-binding protein	VNG_RS01775		-2.48839	-2.65133				0.28645	-0.0794374
gene-VNG_0458G|VNG_0458G|phoU3	VNG_0458G	VNG_RS01780	phosphateuptakeregulatorPhoU	VNG_RS01780		-2.93206	-3.12368				1.26462	-1.02893
gene-VNG_0459G|VNG_0459G|VNG_0459G	VNG_0459G	VNG_RS01785	phosphoadenosinephosphosulfatereductase family protein	VNG_RS01785		-1.18774	0.410281		-0.274739		-0.516463	-1.03749
gene-VNG_0461G|VNG_0461G|aspS	VNG_0461G	VNG_RS01790	aspartate--tRNA(Asn)ligase	aspS		-0.363894	0.961534		-0.759991		-0.765982	-0.515376
gene-VNG_0462C|VNG_0462C|VNG_0462C	VNG_0462C	VNG_RS01795	transcriptionalregulator	VNG_RS01795
gene-VNG_0463C|VNG_0463C|VNG_0463C	VNG_0463C	VNG_RS01800	hypothetical protein	VNG_RS01800
gene-VNG_0465G|VNG_0465G|VNG_0465G	VNG_0465G	VNG_RS01805	ABC transporter ATP-binding protein	VNG_RS01805		-0.460756					-1.60393	1.24408
gene-VNG_0466C|VNG_0466C|VNG_0466C	VNG_0466C	VNG_RS01810	ABC transporter permease	VNG_RS01810		1.47261						1.30298
gene-VNG_0467G|VNG_0467G|VNG_0467G	VNG_0467G	VNG_RS01815	aldo/ketoreductase	VNG_RS01815		1.23234	-0.278169		0.782325		0.0564187	1.49816
gene-VNG_0468C|VNG_0468C|VNG_0468C	VNG_0468C	VNG_RS01820	NAD(P)/FAD-dependentoxidoreductase	VNG_RS01820		-0.908215	-0.734916				-0.466422	0.337193
gene-VNG_0469H|VNG_0469H|VNG_0469H	VNG_0469H	VNG_RS01825	hypothetical protein	VNG_RS01825
gene-VNG_0470G|VNG_0470G|VNG_0470G	VNG_0470G	VNG_RS01830	ABC transporter ATP-binding protein	VNG_RS01830
gene-VNG_0471C|VNG_0471C|VNG_0471C	VNG_0471C	VNG_RS01835	helix-turn-helix transcriptionalregulator	VNG_RS01835		1.09178	-1.64181				1.7035	1.07416
gene-VNG_0472H|VNG_0472H|VNG_0472H	VNG_0472H	VNG_RS01840	DUF2178 domain -containing protein	VNG_RS01840		-0.875794	0.408819				-0.796571	-0.443972
gene-VNG_0473G|VNG_0473G|korB	VNG_0473G	VNG_RS01845	2-oxoacid:ferredoxinoxidoreductasesubunitbeta	VNG_RS01845		0.660931	0.665621		-0.815275		0.0209296	0.0184496
gene-VNG_0474G|VNG_0474G|korA	VNG_0474G	VNG_RS01850	2-oxoacid:acceptoroxidoreductasesubunitalpha	VNG_RS01850		1.05866	0.927036		-1.14912		0.14181	0.0338875
gene-VNG_0475a|VNG_0475a|VNG_0475a	VNG_0475a	VNG_RS01860	NUDIX domain-containing protein	VNG_RS01860		0.944228	0.943155				-0.407528	0.452671
gene-VNG_0475C|VNG_0475C|VNG_0475C	VNG_0475C	VNG_RS01855	ferredoxin--NADPreductase	VNG_RS01855		-0.171249	0.943155				-1.95185	0.881514
gene-VNG_0478C|VNG_0478C|mce	VNG_0478C	VNG_RS01865	methyl malonyl -CoAepimerase	mce		-0.171249	-0.748722				0.340933	0.28061
gene-VNG_0479G|VNG_0479G|VNG_0479G	VNG_0479G	VNG_RS01870	SDR family oxidoreductase	VNG_RS01870		-1.28673					-0.523006	0.244084
gene-VNG_0481G|VNG_0481G|mmcA2	VNG_0481G	VNG_RS01875	methyl malonyl -CoAmutase	VNG_RS01875		-0.241639	-0.818685				0.748591	-0.127475
gene-VNG_0482H|VNG_0482H|VNG_0482H	VNG_0482H	VNG_RS01880	GNAT family N-acetyl transferase	VNG_RS01880		-0.586287	-2.22677				0.302965	1.38159
gene-VNG_0483C|VNG_0483C|VNG_0483C	VNG_0483C	VNG_RS01885	outermembranelipo protein carrier protein LolA	VNG_RS01885		0.257594	-0.15638				0.0619569	0.396087
gene-VNG_0484G|VNG_0484G|acs1	VNG_0484G	VNG_RS01890	AMP-binding protein	VNG_RS01890		-1.29154	-2.09319				0.692776	0.152936
gene-VNG_0485H|VNG_0485H|VNG_0485H	VNG_0485H	VNG_RS01895	hypothetical protein	VNG_RS01895		-0.171249	0.528118					0.074159
gene-VNG_0486G|VNG_0486G|VNG_0486G	VNG_0486G	VNG_RS01900	GNAT family N-acetyl transferase	VNG_RS01900		-0.334748	1.86069				-1.36689	-0.784485
gene-VNG_0487H|VNG_0487H|VNG_0487H	VNG_0487H	VNG_RS01905	GNAT family N-acetyl transferase	VNG_RS01905		-1.41636	1.1995				-1.55953	-1.01226
gene-VNG_0488H|VNG_0488H|VNG_0488H	VNG_0488H	VNG_RS01910	hypothetical protein	VNG_RS01910		-0.533819	0.265084					-0.440414
gene-VNG_0489G|VNG_0489G|dnaJ	VNG_0489G	VNG_RS01915	molecularchaperoneDnaJ	dnaJ		0.760935	0.0744				0.0481511	0.682454
gene-VNG_0491G|VNG_0491G|dnaK	VNG_0491G	VNG_RS01920	molecularchaperoneDnaK	dnaK		-0.100299	0.238283	-0.376	-0.58554		-0.315402	0.0208899
gene-VNG_0492H|VNG_0492H|VNG_0492H	VNG_0492H	VNG_RS01925	hypothetical protein	VNG_RS01925		-0.508284	1.52812				-2.72946	0.737124
gene-VNG_0494G|VNG_0494G|grpE	VNG_0494G	VNG_RS01930	nucleotideexchangefactorGrpE	VNG_RS01930		-0.705586	0.727427		-1.27404		-0.951849	-0.437094
gene-VNG_0496H|VNG_0496H|VNG_0496H	VNG_0496H	VNG_RS01935	hypothetical protein	VNG_RS01935		0.051143	0.550838				0.0778984	-0.533524
gene-VNG_0498C|VNG_0498C|VNG_0498C	VNG_0498C	VNG_RS01940	hypothetical protein	VNG_RS01940		0.176674	1.16555				-1.60393	0.659121
gene-VNG_0499G|VNG_0499G|cna	VNG_0499G	VNG_RS01945	RsmB/NOP family classISAM-dependentRNAmethyl transferase	VNG_RS01945		0.343324	-0.504304				-0.629921	1.52162
gene-VNG_0500G|VNG_0500G|VNG_0500G	VNG_0500G	VNG_RS01950	proteasomeassemblychaperone family protein	VNG_RS01950		-0.449965	-1.23971				0.453408	0.380405
gene-VNG_0501G|VNG_0501G|VNG_0501G	VNG_0501G	VNG_RS01955	MFS transporter	VNG_RS01955
gene-VNG_0502G|VNG_0502G|aspC1	VNG_0502G	VNG_RS01960	amino transferaseclassI/II-foldpyridoxalphosphate-dependentenzyme	VNG_RS01960		0.472607	-0.504304					0.843546
gene-VNG_0503C|VNG_0503C|VNG_0503C	VNG_0503C	VNG_RS01965	classISAM-dependentmethyl transferase	VNG_RS01965		-0.533819	0.0362648					-0.533524
gene-VNG_0504G|VNG_0504G|VNG_0504G	VNG_0504G	VNG_RS01970	redox-regulatedATPaseYchF	VNG_RS01970		-0.930241	-0.400799				0.270543	-0.755916
gene-VNG_0505C|VNG_0505C|VNG_0505C	VNG_0505C	VNG_RS01975	HlyC/CorC family transporter	VNG_RS01975
gene-VNG_0506H|VNG_0506H|VNG_0506H	VNG_0506H	VNG_RS01980	hypothetical protein	VNG_RS01980
gene-VNG_0507C|VNG_0507C|VNG_0507C	VNG_0507C	VNG_RS01985	acyl transferase	VNG_RS01985		0.594285	1.12758				-0.591953	0.102728
gene-VNG_0508H|VNG_0508H|VNG_0508H	VNG_0508H	VNG_RS01990	hypothetical protein	VNG_RS01990		0.966254						1.53359
gene-VNG_0509H|VNG_0509H|VNG_0509H	VNG_0509H	VNG_RS14175	hypothetical protein	VNG_RS14175		1.73564						1.24408
gene-VNG_0510G|VNG_0510G|pan2	VNG_0510G	VNG_RS01995	proteasome-activatingnucleotidase	VNG_RS01995		0.462439	0.354653				-0.505492	0.657348
gene-VNG_0511H|VNG_0511H|VNG_0511H	VNG_0511H	VNG_RS02000	wingedhelix-turn-helix domain -containing protein	VNG_RS02000
gene-VNG_0512G|VNG_0512G|mre11	VNG_0512G	VNG_RS02005	exonucleaseSbcCDsubunitD	VNG_RS02005
gene-VNG_0514C|VNG_0514C|rad50	VNG_0514C	VNG_RS02010	DNAdouble-strandbreak repairATPaseRad50	VNG_RS02010		-1.01078					-0.646994	0.907049
gene-VNG_0516a|VNG_0516a|VNG_0516a	VNG_0516a	VNG_RS02020	hypothetical protein	VNG_RS02020		1.34065	0.358193				-0.0920266	1.11855
gene-VNG_0516H|VNG_0516H|VNG_0516H	VNG_0516H	VNG_RS02015	hypothetical protein	VNG_RS02015
gene-VNG_0518H|VNG_0518H|VNG_0518H	VNG_0518H	VNG_RS02025	hypothetical protein	VNG_RS02025		0.578772	-0.727964				0.697244	0.653562
gene-VNG_0520H|VNG_0520H|VNG_0520H	VNG_0520H	VNG_RS02030	hypothetical protein	VNG_RS02030		0.611652	-1.3523				1.52293	0.485092
gene-VNG_0521G|VNG_0521G|polB1	VNG_0521G	VNG_RS02035	DNApolymeraseelongationsubunit	VNG_RS02035		0.150679	-0.215542				0.100618	0.309672
gene-VNG_0523G|VNG_0523G|VNG_0523G	VNG_0523G	VNG_RS02040	SDR family oxidoreductase	VNG_RS02040		-0.197722	0.0586326				-0.603926	0.391641
gene-VNG_0524G|VNG_0524G|sufC	VNG_0524G	VNG_RS02045	ABC transporter ATP-binding protein	VNG_RS02045		1.46273	0.285237				0.399689	0.821874
gene-VNG_0525C|VNG_0525C|sufB1	VNG_0525C	VNG_RS02050	Fe-S cluster assembly protein SufB	sufB		1.76856	-0.119063		0.251568		1.0632	0.868499
gene-VNG_0527a|VNG_0527a|VNG_0527a	VNG_0527a	VNG_RS02060	rubrerythrin	VNG_RS02060		1.8627	0.332198				0.270543	1.30403
gene-VNG_0527C|VNG_0527C|sufB2	VNG_0527C	VNG_RS02055	Fe-Sclusterassembly protein SufD	sufD		2.24444	-0.150821		1.32389		1.6934	0.745931
gene-VNG_0529H|VNG_0529H|VNG_0529H	VNG_0529H	VNG_RS02060	rubrerythrin	VNG_RS02060								0.311198
gene-VNG_0530a|VNG_0530a|VNG_0530a	VNG_0530a	VNG_RS13275	hypothetical protein	VNG_RS13275		0.114153	-1.8548				1.52793	0.485092
gene-VNG_0530G|VNG_0530G|VNG_0530G	VNG_0530G	VNG_RS02065	metal-dependent transcriptionalregulator	VNG_RS02065		0.693821	-0.641807				0.370079	1.00962
gene-VNG_0532a|VNG_0532a|VNG_0532a	VNG_0532a					0.70322						1.11855
gene-VNG_0532H|VNG_0532H|VNG_0532H	VNG_0532H	VNG_RS13280
gene-VNG_0533H|VNG_0533H|VNG_0533H	VNG_0533H	VNG_RS02080	AIM24 family protein	VNG_RS02080		-1.0997	-1.62773				0.0603258	0.51178
gene-VNG_0534C|VNG_0534C|VNG_0534C	VNG_0534C	VNG_RS02085	HD domain -containing protein	VNG_RS02085		-0.974852	-1.7638				0.479997	0.353018
gene-VNG_0535C|VNG_0535C|VNG_0535C	VNG_0535C	VNG_RS02090	TMEM165/GDT1 family protein	VNG_RS02090		1.25684	2.1378				-1.01896	0.182074
gene-VNG_0536G|VNG_0536G|sirR	VNG_0536G	VNG_RS02095	metal-dependent transcriptionalregulator	VNG_RS02095		1.75129	2.00508		2.20477		-0.677926	0.468207
gene-VNG_0537C|VNG_0537C|VNG_0537C	VNG_0537C	VNG_RS02100	TRAP transporter permease	VNG_RS02100		-0.908215	0.0462489				0.703503	-1.6139
gene-VNG_0539C|VNG_0539C|VNG_0539C	VNG_0539C	VNG_RS02105	DUF1850 domain -containing protein	VNG_RS02105		-0.586287	-0.0568446					0.074159
gene-VNG_0540G|VNG_0540G|VNG_0540G	VNG_0540G	VNG_RS02110	TAXI family TRAP transporter solute-bindingsubunit	VNG_RS02110		-2.43622	-1.20474		-0.677841		-0.341295	-0.846114
gene-VNG_0541G|VNG_0541G|thrC2	VNG_0541G	VNG_RS02115	threoninesynthase	VNG_RS02115		-0.569799	0.0686863		-0.725709		-0.543043	-0.0513719
gene-VNG_0542C|VNG_0542C|VNG_0542C	VNG_0542C	VNG_RS02120	NAD(P)/FAD-dependentoxidoreductase	VNG_RS02120		-0.345279	-1.11129				-0.434001	1.24408
gene-VNG_0543H|VNG_0543H|VNG_0543H	VNG_0543H	VNG_RS02125	metallophosphoesterase	VNG_RS02125		-0.329947	0.599201				-0.270025	-0.615053
gene-VNG_0544a|VNG_0544a|VNG_0544a	VNG_0544a	VNG_RS02130	J domain-containing protein	VNG_RS02130		0.861172	0.224926				0.483537	0.196778
gene-VNG_0544H|VNG_0544H|VNG_0544H	VNG_0544H	VNG_RS02130	J domain-containing protein	VNG_RS02130
gene-VNG_0546C|VNG_0546C|VNG_0546C	VNG_0546C	VNG_RS02135	proteasomeassemblychaperone family protein	VNG_RS02135		0.966254	1.43911				-0.0879105	-0.340879
gene-VNG_0548C|VNG_0548C|nop10	VNG_0548C	VNG_RS02140	RNA- protein complex protein Nop10	VNG_RS02140		-0.819777	-1.08927				-0.0955844	0.409143
gene-VNG_0549G|VNG_0549G|tif2a	VNG_0549G	VNG_RS02145	translationinitiationfactorIF-2subunitalpha	VNG_RS02145		-0.933209	-0.542271				-0.048634	-0.298234
gene-VNG_0550G|VNG_0550G|rps27e	VNG_0550G	VNG_RS02150	30Sribosomal protein S27e	VNG_RS02150		-1.04751	-0.237417				-1.12312	0.357093
gene-VNG_0551G|VNG_0551G|rpl42e	VNG_0551G	VNG_RS02155	50Sribosomal protein L44e	VNG_RS02155		-1.20872	-0.476748				-0.385502	-0.302404
gene-VNG_0553a|VNG_0553a|VNG_0553a	VNG_0553a
gene-VNG_0553C|VNG_0553C|VNG_0553C	VNG_0553C	VNG_RS02160	hypothetical protein	VNG_RS02160		-0.171249	-1.2633				0.592472	0.543644
gene-VNG_0555C|VNG_0555C|VNG_0555C	VNG_0555C	VNG_RS02175	DUF2298 domain -containing protein	VNG_RS02175		-0.386978	0.513471				-0.854987	-0.00139204
gene-VNG_0556G|VNG_0556G|VNG_0556G	VNG_0556G	VNG_RS02180	lipopolysaccharidebiosynthesis protein	VNG_RS02180
gene-VNG_0557H|VNG_0557H|VNG_0557H	VNG_0557H	VNG_RS02190	DJ-1/PfpI family protein	VNG_RS02190		3.63168	2.29679				-0.688815	2.06777
gene-VNG_0559G|VNG_0559G|apt1	VNG_0559G	VNG_RS02195	purinephosphoribosyl transferase family protein	VNG_RS02195		-1.27816	-1.83445		-1.17951		0.0481511	0.552206
gene-VNG_0560C|VNG_0560C|mrpD2	VNG_0560C	VNG_RS02200	Na(+)/H(+)antiportersubunitD	VNG_RS02200		-1.40342	-1.12097				0.169615	-0.407993
gene-VNG_0562C|VNG_0562C|mrpD1	VNG_0562C	VNG_RS02205	cation:protonantiporter	VNG_RS02205		-0.943839	-0.781985				0.252841	-0.370626
gene-VNG_0563G|VNG_0563G|mrpD3	VNG_0563G	VNG_RS02210	monovalentcation/H+antiportersubunitD family protein	VNG_RS02210		-1.09108	-0.440173				0.0481511	-0.654987
gene-VNG_0564H|VNG_0564H|mrpB2	VNG_0564H	VNG_RS02220	Na(+)/H(+)antiportersubunitB	VNG_RS02220		-0.656676	-0.748722				0.270543	-0.134428
gene-VNG_0565C|VNG_0565C|mrpC	VNG_0565C	VNG_RS02215	cation:protonantiportersubunitC	VNG_RS02215		-1.34813	-0.741343				0.0619569	-0.624671
gene-VNG_0566C|VNG_0566C|mrpB1	VNG_0566C	VNG_RS02225	DUF4040 domain -containing protein	VNG_RS02225		-1.17125	-1.10124				0.614498	-0.640439
gene-VNG_0568C|VNG_0568C|mrpF	VNG_0568C	VNG_RS02235	cation:protonantiporter	VNG_RS02235		-0.623762	-2.37877				0.476994	1.32209
gene-VNG_0570H|VNG_0570H|mrpG	VNG_0570H	VNG_RS02230	Na+/H+ antiporter subunit G	VNG_RS02230		-0.323253	-0.279237				0.0190047	-0.0189504
gene-VNG_0571C|VNG_0571C|mrpE	VNG_0571C	VNG_RS02240	monovalentcation/H+antiportersubunitE	VNG_RS02240		-0.734186	0.165548				-0.844934	-0.0107299
gene-VNG_0572a|VNG_0572a|VNG_0572a	VNG_0572a	VNG_RS02250	SRPBCC family protein	VNG_RS02250		-0.14268	0.501151				-0.203388	-0.396374
gene-VNG_0572G|VNG_0572G|coaBC	VNG_0572G	VNG_RS02245	bifunctionalphosphopantothenoyl cysteinedecarboxyl ase/phosphopantothenate--cysteineligaseCoABC	coABC		-0.171249	-0.0568446					-0.510804
gene-VNG_0573C|VNG_0573C|hcpF	VNG_0573C	VNG_RS02255	hypothetical protein	VNG_RS02255		-0.10824	0.550838		-0.635764		-0.559532	-0.0554763
gene-VNG_0574C|VNG_0574C|VNG_0574C	VNG_0574C	VNG_RS02260	MTH865 family protein	VNG_RS02260		-0.630681	0.881755				-0.603926	-0.86444
gene-VNG_0575G|VNG_0575G|ywaD1	VNG_0575G	VNG_RS02265	M28 family peptidase	VNG_RS02265		-0.345279	0.417087				-0.434001	-0.284295
gene-VNG_0576C|VNG_0576C|nadK2	VNG_0576C	VNG_RS02270	NAD(+)/NADH kinase	VNG_RS02270		-0.895615					-1.80746	1.18268
gene-VNG_0578H|VNG_0578H|VNG_0578H	VNG_0578H	VNG_RS02275	hypothetical protein	VNG_RS02275		1.45602	1.35819				0.0481511	0.0937497
gene-VNG_0579H|VNG_0579H|VNG_0579H	VNG_0579H	VNG_RS02280	hypothetical protein	VNG_RS02280		1.10439	1.16555				-0.485531	0.468438
gene-VNG_0581H|VNG_0581H|VNG_0581H	VNG_0581H	VNG_RS02285	hypothetical protein	VNG_RS02285		0.944228	1.16555				-0.729457	0.552206
gene-VNG_0582C|VNG_0582C|petD	VNG_0582C	VNG_RS02290	cytochromebccomplexcytochromebsubunit	VNG_RS02290		0.317954	-0.217002		-0.917025		0.610884	-0.0318579
gene-VNG_0583G|VNG_0583G|petB	VNG_0583G	VNG_RS02295	cytochromebccomplexcytochromebsubunit	VNG_RS02295		0.757197	0.0539359		-1.56918		0.466094	0.281237
gene-VNG_0584H|VNG_0584H|petA	VNG_0584H	VNG_RS02300	Rieske2Fe-2S domain -containing protein	VNG_RS02300		0.405151	0.156751				0.00921541	0.283255
gene-VNG_0585H|VNG_0585H|VNG_0585H	VNG_0585H	VNG_RS02305	hypothetical protein	VNG_RS02305		0.182388	0.707342				-0.922102	0.441216
gene-VNG_0586C|VNG_0586C|hcpE	VNG_0586C	VNG_RS02310	hypothetical protein	VNG_RS02310		0.366407	0.635033				-0.661285	0.436729
gene-VNG_0587H|VNG_0587H|VNG_0587H	VNG_0587H	VNG_RS02315	hypothetical protein	VNG_RS02315		-0.685823	1.05863				-2.05138	0.350999
gene-VNG_0590H|VNG_0590H|VNG_0590H	VNG_0590H	VNG_RS02320	hypothetical protein	VNG_RS02320		-0.171249						0.881514
gene-VNG_0591C|VNG_0591C|VNG_0591C	VNG_0591C	VNG_RS02325	helix-turn-helix transcriptionalregulator	VNG_RS02325		0.522647	0.123728				0.0899713	0.353018
gene-VNG_0592G|VNG_0592G|nthA	VNG_0592G	VNG_RS02330	endonuclease III	nth		1.52627	1.49675				-0.438225	0.511808
gene-VNG_0593a|VNG_0593a|VNG_0593a	VNG_0593a	VNG_RS02340	hypothetical protein	VNG_RS02340
gene-VNG_0593G|VNG_0593G|mvaD	VNG_0593G	VNG_RS02335	diphosphomevalonatedecarboxyl ase	mvaD		-0.919711	1.60612				-1.53681	-0.94495
gene-VNG_0594H|VNG_0594H|VNG_0594H	VNG_0594H	VNG_RS02345	hypothetical protein	VNG_RS02345		0.506822						0.659121
gene-VNG_0595H|VNG_0595H|VNG_0595H	VNG_0595H	VNG_RS02350	VOC family protein	VNG_RS02350		0.051143	0.317551				-0.144494	-0.0778441
gene-VNG_0596H|VNG_0596H|VNG_0596H	VNG_0596H	VNG_RS02355	DUF2797 domain-containing protein	VNG_RS02355		-0.0492589	0.358193				-1.23196	0.868575
gene-VNG_0597H|VNG_0597H|VNG_0597H	VNG_0597H	VNG_RS02360	hypothetical protein	VNG_RS02360		-1.65668	-2.8642		-3.12532		-0.144494	1.39609
gene-VNG_0598C|VNG_0598C|gth1	VNG_0598C	VNG_RS02365	glycosyl transferase	VNG_RS02365		-0.29678	0.580585					-0.688802
gene-VNG_0599C|VNG_0599C|rnp4	VNG_0599C	VNG_RS02375	ribonucleaseP	VNG_RS02375		-1.82333					-1.60393
gene-VNG_0600C|VNG_0600C|gth2	VNG_0600C	VNG_RS02370	glycosyl transferase	VNG_RS02370		-1.51229	1.68012				-1.80746	-1.34088
gene-VNG_0601H|VNG_0601H|VNG_0601H	VNG_0601H	VNG_RS02380	YhbY family RNA-binding protein	VNG_RS02380		-1.07171	0.943155				-1.36689	-0.603913
gene-VNG_0602C|VNG_0602C|VNG_0602C	VNG_0602C	VNG_RS02385	universalstress protein	VNG_RS02385		-0.923322	-0.641807				-0.337139	0.0996941
gene-VNG_0604H|VNG_0604H|VNG_0604H	VNG_0604H	VNG_RS02390	hypothetical protein	VNG_RS02390		0.323515	-1.43536				1.09651	0.706427
gene-VNG_0608C|VNG_0608C|VNG_0608C	VNG_0608C	VNG_RS02400	CoA-binding protein	VNG_RS02400		-0.875794	1.03626				-1.282	-0.585991
gene-VNG_0609C|VNG_0609C|VNG_0609C	VNG_0609C	VNG_RS02405	hypothetical protein	VNG_RS02405		-0.33588	0.220689				-0.357488	-0.155012
gene-VNG_0610G|VNG_0610G|ubiA2	VNG_0610G	VNG_RS02410	geranyl geranyl glycerol-phosphategeranyl geranyl transferase	VNG_RS02410								-0.992955
gene-VNG_0611a|VNG_0611a|VNG_0611a	VNG_0611a	VNG_RS02425	hypothetical protein	VNG_RS02425
gene-VNG_0611H|VNG_0611H|VNG_0611H	VNG_0611H	VNG_RS02420	hypothetical protein	VNG_RS02420		-3.23014	-0.748722				-0.980995	-1.45636
gene-VNG_0612H|VNG_0612H|VNG_0612H	VNG_0612H	VNG_RS02430	hypothetical protein	VNG_RS02430
gene-VNG_0613a|VNG_0613a|VNG_0613a	VNG_0613a	VNG_RS02435	hypothetical protein	VNG_RS02435
gene-VNG_0613H|VNG_0613H|VNG_0613H	VNG_0613H	VNG_RS02435	hypothetical protein	VNG_RS02435		0.828751						0.436729
gene-VNG_0614G|VNG_0614G|htr16	VNG_0614G	VNG_RS02440	HAMP domain -containing protein	VNG_RS02440		1.16373	-0.641807				0.981037	0.868575
gene-VNG_0615C|VNG_0615C|pchA2	VNG_0615C	VNG_RS02445	NAD-binding protein	VNG_RS02445			0.47367					-1.04132
gene-VNG_0617H|VNG_0617H|VNG_0617H	VNG_0617H	VNG_RS02450	hypothetical protein	VNG_RS02450		-1.3388	-1.27812				0.182487	-0.199105
gene-VNG_0620G|VNG_0620G|sppA	VNG_0620G	VNG_RS02455	S49 family peptidase	VNG_RS02455		-1.12159	-0.827819		0.686523		-0.195922	-0.0537804
gene-VNG_0622H|VNG_0622H|VNG_0622H	VNG_0622H	VNG_RS02460	NAD(P)/FAD-dependentoxidoreductase	VNG_RS02460		-0.849321	-1.64181				-0.434001	1.27056
gene-VNG_0623G|VNG_0623G|pccB1	VNG_0623G	VNG_RS02465	acyl -CoAcarboxyl asesubunitbeta	VNG_RS02465		-3.17125	-2.52316				-0.185136	-0.418881
gene-VNG_0624H|VNG_0624H|VNG_0624H	VNG_0624H	VNG_RS02470	DoxX family membrane protein	VNG_RS02470
gene-VNG_0626G|VNG_0626G|maoC2	VNG_0626G	VNG_RS02475	MaoC family dehydratase	VNG_RS02475
gene-VNG_0627G|VNG_0627G|citE	VNG_0627G	VNG_RS02480	CoAesterlyase	VNG_RS02480		1.43756	1.72743				-0.88146	0.635663
gene-VNG_0628G|VNG_0628G|gdhA1	VNG_0628G	VNG_RS02485	Glu/Leu/Phe/Valdehydrogenase	VNG_RS02485		-2.81252	-1.97884				-0.681928	-0.107679
gene-VNG_0629G|VNG_0629G|aspC2	VNG_0629G	VNG_RS02490	pyridoxalphosphate-dependentamino transferase	VNG_RS02490		0.124605	-0.035783		0.980683		-0.12312	0.327578
gene-VNG_0630G|VNG_0630G|ribH	VNG_0630G	VNG_RS02495	6,7-dimethyl -8-ribityl lumazinesynthase	VNG_RS02495		0.306798	0.559827				-0.629921	0.420962
gene-VNG_0631C|VNG_0631C|VNG_0631C	VNG_0631C	VNG_RS02500	TIGR03663 family protein	VNG_RS02500								-1.53352
gene-VNG_0632G|VNG_0632G|purK	VNG_0632G	VNG_RS02505	5-(carboxyamino)imidazoleribonucleotidesynthase	VNG_RS02505		0.423909	-0.741343				0.207808	1.00151
gene-VNG_0633G|VNG_0633G|purE	VNG_0633G	VNG_RS02510	5-(carboxyamino)imidazoleribonucleotidemutase	purE		0.390254	-0.641807				-0.291335	1.36747
gene-VNG_0635G|VNG_0635G|nuoA	VNG_0635G	VNG_RS02515	NADH-quinoneoxidoreductasesubunitA	VNG_RS02515		0.319591	0.713674				-0.626887	0.276874
gene-VNG_0636G|VNG_0636G|nuoB	VNG_0636G	VNG_RS02520	NADH-quinoneoxidoreductasesubunitB	VNG_RS02520		-0.256138	-0.152769				-0.440887	0.381588
gene-VNG_0637G|VNG_0637G|nuoCD	VNG_0637G	VNG_RS02525	NADH-quinoneoxidoreductasesubunitD	VNG_RS02525		-0.341442	-0.194064				-0.140219	0.0369107
gene-VNG_0639G|VNG_0639G|nuoH	VNG_0639G	VNG_RS02530	NADH-quinoneoxidoreductasesubunitH	VNG_RS02530		-0.329615	-0.461235				0.426113	-0.250424
gene-VNG_0640G|VNG_0640G|nuoI	VNG_0640G	VNG_RS02535	NADH-quinoneoxidoreductasesubunitI	VNG_RS02535		-0.0278852	-0.80436				0.720154	0.100391
gene-VNG_0641C|VNG_0641C|nuoJ1	VNG_0641C	VNG_RS02540	NADH-quinoneoxidoreductasesubunitJ	VNG_RS02540		-0.286727	-0.191146				0.0619569	-0.113468
gene-VNG_0642C|VNG_0642C|nuoJ2	VNG_0642C	VNG_RS02545	NADH-quinoneoxidoreductasesubunitJ	VNG_RS02545		-0.804467	-0.28817				-0.222497	-0.249731
gene-VNG_0643G|VNG_0643G|nuoK	VNG_0643G	VNG_RS02550	NADH-quinoneoxidoreductasesubunitNuoK	nuoK		0.051143	-1.08238				1.51847	-0.340879
gene-VNG_0646G|VNG_0646G|nuoL	VNG_0646G	VNG_RS02555	NADH-quinoneoxidoreductasesubunitL	nuoL		-0.647278	-0.46573				0.298558	-0.436036
gene-VNG_0647G|VNG_0647G|nuoM	VNG_0647G	VNG_RS02560	NuoM family protein	VNG_RS02560		-1.28336	-0.825253				0.180128	-0.594165
gene-VNG_0648G|VNG_0648G|nuoN	VNG_0648G	VNG_RS02565	NADH-quinoneoxidoreductasesubunitN	VNG_RS02565		-1.37288	-0.380682				-0.0127041	-0.935427
gene-VNG_0650C|VNG_0650C|VNG_0650C	VNG_0650C	VNG_RS02570	DHH family phosphoesterase	VNG_RS02570		-0.881743	-0.0137759				-0.854987	0.0310903
gene-VNG_0651G|VNG_0651G|VNG_0651G	VNG_0651G	VNG_RS02575	ParB/RepB/Spo0J family partition protein	VNG_RS02575		-0.0972488	0.284192				-1.07049	0.733122
gene-VNG_0653G|VNG_0653G|mmcA1	VNG_0653G	VNG_RS02580	methyl malonyl -CoAmutase family protein	VNG_RS02580		-2.01255	-4.80101				1.49533	1.33719
gene-VNG_0654C|VNG_0654C|VNG_0654C	VNG_0654C	VNG_RS02585	GNAT family N-acetyl transferase	VNG_RS02585		-3.45032	-3.80327				-0.371728	0.768746
gene-VNG_0656a|VNG_0656a|VNG_0656a	VNG_0656a
gene-VNG_0656H|VNG_0656H|VNG_0656H	VNG_0656H	VNG_RS02590	hypothetical protein	VNG_RS02590		0.221068	0.358193					0.0514389
gene-VNG_0657G|VNG_0657G|coxA1	VNG_0657G	VNG_RS02595	cytochromecoxidasesubunitI	ctaD		-0.201838	-0.233271		1.65168		-0.185424	0.260928
gene-VNG_0659H|VNG_0659H|VNG_0659H	VNG_0659H	VNG_RS02600	hypothetical protein	VNG_RS02600		0.721835	0.741522				-0.0132495	0.0376331
gene-VNG_0660H|VNG_0660H|VNG_0660H	VNG_0660H	VNG_RS02605	hypothetical protein	VNG_RS02605		0.253248	0.559827				-1.07049	0.807985
gene-VNG_0662G|VNG_0662G|coxC1	VNG_0662G	VNG_RS02610	heme-copperoxidasesubunitIII	VNG_RS02610		-1.03375	-0.705937				-0.264788	-0.0189504
gene-VNG_0664G|VNG_0664G|birA2	VNG_0664G	VNG_RS02615	biotin--[acetyl -CoA-carboxyl ase]ligase	VNG_RS02615		-1.03375					-0.88146	0.796625
gene-VNG_0665G|VNG_0665G|coxB1	VNG_0665G	VNG_RS02620	cytochromecoxidasesubunitII	coxB		0.203678	0.642808				-0.86603	0.470969
gene-VNG_0666G|VNG_0666G|ctaB	VNG_0666G	VNG_RS02625	protohemeIXfarnesyl transferase	cyoE		-0.852427	-0.263295				-0.55437	0.00930785
gene-VNG_0667G|VNG_0667G|VNG_0667G	VNG_0667G	VNG_RS02630	hypothetical protein	VNG_RS02630		-0.202958	-1.05684				-0.0830935	0.98105
gene-VNG_0668C|VNG_0668C|VNG_0668C	VNG_0668C	VNG_RS02635	ABC transporter ATP-binding protein	VNG_RS02635		-1.92614	-2.27924				-0.0920266	0.489196
gene-VNG_0669H|VNG_0669H|VNG_0669H	VNG_0669H	VNG_RS02640	ABC transporter permease	VNG_RS02640
gene-VNG_0670H|VNG_0670H|VNG_0670H	VNG_0670H	VNG_RS02645	hypothetical protein	VNG_RS02645		0.191321	1.68012					0.507118
gene-VNG_0671H|VNG_0671H|VNG_0671H	VNG_0671H	VNG_RS02650	DUF420 domain -containing protein	VNG_RS02650		-0.211891	2.52812				-3.31442	0.61848
gene-VNG_0673G|VNG_0673G|mmcB	VNG_0673G	VNG_RS02655	cobalaminB12-binding domain -containing protein	VNG_RS02655		0.466181	-0.361699		1.23989		0.492936	0.379014
gene-VNG_0674C|VNG_0674C|ygfD	VNG_0674C	VNG_RS02660	methyl malonyl Co-Amutase-associatedGTPaseMeaB	meaB		-0.141087	-0.00437716				-0.539354	0.446713
gene-VNG_0675C|VNG_0675C|VNG_0675C	VNG_0675C	VNG_RS02665	alpha/betafoldhydrolase	VNG_RS02665		0.135932	0.202542				-0.567705	0.545165
gene-VNG_0676C|VNG_0676C|VNG_0676C	VNG_0676C	VNG_RS02670	Zn-ribbon domain -containingOB-fold protein	VNG_RS02670		0.150679	0.417087				-0.144494	-0.0778441
gene-VNG_0677H|VNG_0677H|VNG_0677H	VNG_0677H	VNG_RS02680	hypothetical protein	VNG_RS02680		-0.308753	-0.263295				-0.281998	0.28061
gene-VNG_0678G|VNG_0678G|acaB1	VNG_0678G	VNG_RS02675	thiolase domain -containing protein	VNG_RS02675		-0.235955	1.05863		0.693677		-1.39242	0.141904
gene-VNG_0679G|VNG_0679G|acd4	VNG_0679G	VNG_RS02685	acyl -CoAdehydrogenase	VNG_RS02685		-1.05898	-0.716909				-0.470598	0.172593
gene-VNG_0680G|VNG_0680G|fdfT	VNG_0680G	VNG_RS02690	phytoene/squalenesynthase family protein	VNG_RS02690		-1.04819	-1.08238				-0.501429	0.579687
gene-VNG_0681G|VNG_0681G|hbd1	VNG_0681G	VNG_RS02695	3-hydroxybutyryl -CoAdehydrogenase	VNG_RS02695		0.789102	1.27073		1.51803		-0.432071	-0.00548815
gene-VNG_0682C|VNG_0682C|VNG_0682C	VNG_0682C	VNG_RS02700	hypothetical protein	VNG_RS02700		-1.39364					-0.629921	1.65912
gene-VNG_0683C|VNG_0683C|fba1	VNG_0683C	VNG_RS02705	aldolase	VNG_RS02705		0.26347	0.920613				-0.226024	-0.387049
gene-VNG_0684G|VNG_0684G|fbp	VNG_0684G	VNG_RS02710	class1fructose-1,6-bisphosphatase	VNG_RS02710		0.331251	0.33594				0.300291	-0.26091
gene-VNG_0686C|VNG_0686C|VNG_0686C	VNG_0686C	VNG_RS02715	SOSresponse-associatedpeptidase	VNG_RS02715		0.413713	1.16555				-0.729457	0.0216916
gene-VNG_0688H|VNG_0688H|VNG_0688H	VNG_0688H	VNG_RS02720	helix-turn-helix transcriptionalregulator	VNG_RS02720		-1.23538	-3.31988				0.331944	1.79663
gene-VNG_0689G|VNG_0689G|VNG_0689G	VNG_0689G	VNG_RS02725	ABC transporter ATP-binding protein	VNG_RS02725		-0.913452	-1.42608				0.28614	0.270556
gene-VNG_0690C|VNG_0690C|VNG_0690C	VNG_0690C	VNG_RS02730	ABC transporter permease	VNG_RS02730		-0.586287	-1.31988				0.0481511	0.729511
gene-VNG_0692C|VNG_0692C|VNG_0692C	VNG_0692C	VNG_RS02735	ABC transporter permease	VNG_RS02735		-0.329947	-0.935538				0.518471	0.13119
gene-VNG_0694G|VNG_0694G|VNG_0694G	VNG_0694G	VNG_RS02740	DUF123 domain -containing protein	VNG_RS02740		0.472607	-0.15638					0.495623
gene-VNG_0698H|VNG_0698H|VNG_0698H	VNG_0698H	VNG_RS02745	hypothetical protein	VNG_RS02745		-1.75621	-1.05684				-0.665326	0.0100287
gene-VNG_0700G|VNG_0700G|copA	VNG_0700G	VNG_RS02750	copper- translocatingP-typeATPase	VNG_RS02750		1.00866	0.465108				-0.444054	1.03168
gene-VNG_0702H|VNG_0702H|VNG_0702H	VNG_0702H	VNG_RS02755	heavy-metal-associated domain -containing protein	VNG_RS02755		-0.508284	0.75051				-0.729457	-0.485268
gene-VNG_0703H|VNG_0703H|VNG_0703H	VNG_0703H	VNG_RS02760	MarR family transcriptionalregulator	VNG_RS02760		3.78036	2.1995				-0.144494	1.76943
gene-VNG_0704C|VNG_0704C|VNG_0704C	VNG_0704C	VNG_RS02765	helix-turn-helix transcriptionalregulator	VNG_RS02765		0.238142	-0.0943193				-0.444054	0.820585
gene-VNG_0705C|VNG_0705C|phr3	VNG_0705C	VNG_RS02770	cryptochrome/photolyase family protein	VNG_RS02770		1.04174	-0.592897				0.669093	1.00962
gene-VNG_0707C|VNG_0707C|VNG_0707C	VNG_0707C	VNG_RS02775	uracil-DNAglycosyl ase family protein	VNG_RS02775		0.413713	1.52812					0.396087
gene-VNG_0708H|VNG_0708H|VNG_0708H	VNG_0708H	VNG_RS02780	hypothetical protein	VNG_RS02780		-1.62872	-1.61944				0.331944	-0.297157
gene-VNG_0709C|VNG_0709C|VNG_0709C	VNG_0709C	VNG_RS02785	MBLfoldmetallo-hydrolase	VNG_RS02785		-1.67215	-1.04643				0.150249	-0.731899
gene-VNG_0711C|VNG_0711C|VNG_0711C	VNG_0711C	VNG_RS02790	thioredoxin family protein	VNG_RS02790		-1.29678	-1.96374				0.592472	0.118553
gene-VNG_0713C|VNG_0713C|VNG_0713C	VNG_0713C	VNG_RS02795	O-methyl transferase	VNG_RS02795
gene-VNG_0715G|VNG_0715G|thiC	VNG_0715G	VNG_RS02800	phosphomethyl pyrimidinesynthaseThiC	thiC		0.453606	2.91668				-1.68956	-0.729444
gene-VNG_0716G|VNG_0716G|VNG_0716G	VNG_0716G	VNG_RS02805	PAS domain -containingsensorhistidinekinase	VNG_RS02805		0.521773	-0.542271				-1.24403	2.35214
gene-VNG_0717H|VNG_0717H|VNG_0717H	VNG_0717H	VNG_RS02810	hypothetical protein	VNG_RS02810		-0.00132442	0.580585					0.0216916
gene-VNG_0718C|VNG_0718C|VNG_0718C	VNG_0718C	VNG_RS02815	phosphoglycolatephosphatase	VNG_RS02815
gene-VNG_0719G|VNG_0719G|VNG_0719G	VNG_0719G	VNG_RS02820	HAD-IIA family hydrolase	VNG_RS02820		-0.961796	-0.822379				-0.0570312	-0.0383157
gene-VNG_0720G|VNG_0720G|VNG_0720G	VNG_0720G	VNG_RS02825	MATE family efflux transporter	VNG_RS02825		1.73564						1.75866
gene-VNG_0723G|VNG_0723G|pepQ	VNG_0723G	VNG_RS02830	aminopeptidaseP family protein	VNG_RS02830		-1.58629	-0.724269				-0.559532	-0.258416
gene-VNG_0724H|VNG_0724H|VNG_0724H	VNG_0724H	VNG_RS02835	hypothetical protein	VNG_RS02835
gene-VNG_0725H|VNG_0725H|VNG_0725H	VNG_0725H	VNG_RS02840	helix-turn-helix transcriptionalregulator	VNG_RS02840		-0.459375	-0.263295				-0.680547	0.528537
gene-VNG_0726C|VNG_0726C|VNG_0726C	VNG_0726C	VNG_RS02845	TetR family transcriptionalregulatorC-terminal domain -containing protein	VNG_RS02845		-0.766859	-0.497417				0.0159707	-0.241343
gene-VNG_0727C|VNG_0727C|VNG_0727C	VNG_0727C	VNG_RS02850	MATE family efflux transporter	VNG_RS02850		-0.519173	0.492049	-1.019			0.218076	-1.18523
gene-VNG_0729H|VNG_0729H|VNG_0729H	VNG_0729H	VNG_RS02855	hypothetical protein	VNG_RS02855		1.50682	2.88175				-2.46642	1.13556
gene-VNG_0730C|VNG_0730C|panE	VNG_0730C	VNG_RS02860	2-dehydropantoate2-reductase	VNG_RS02860		-2.17125	-1.12723				-0.507064	-0.492882
gene-VNG_0731H|VNG_0731H|VNG_0731H	VNG_0731H	VNG_RS02865	carotenoidbiosynthesis protein	VNG_RS02865
gene-VNG_0732G|VNG_0732G|rtcA	VNG_0732G	VNG_RS02870	RNA3'-terminalphosphatecyclase	VNG_RS02870		-0.685823	0.28893				-1.27378	0.343094
gene-VNG_0733H|VNG_0733H|VNG_0733H	VNG_0733H	VNG_RS02875	DUF1684 domain -containing protein	VNG_RS02875		-0.393642						0.436729
gene-VNG_0734G|VNG_0734G|tfbB	VNG_0734G	VNG_RS02880	transcriptioninitiationfactorIIB	VNG_RS02880		2.47102	1.77436				-0.59075	1.33148
gene-VNG_0735G|VNG_0735G|VNG_0735G	VNG_0735G	VNG_RS02885	responseregulator	VNG_RS02885		0.243788	-0.542271				-0.507064	1.33719
gene-VNG_0736G|VNG_0736G|VNG_0736G	VNG_0736G	VNG_RS02890	PAS domain S-box protein	VNG_RS02890		1.11415	-0.0854137				0.358006	0.88563
gene-VNG_0737H|VNG_0737H|VNG_0737H	VNG_0737H	VNG_RS02900	hypothetical protein	VNG_RS02900		-0.936784	0.358193				-1.23196	-0.0189504
gene-VNG_0738H|VNG_0738H|VNG_0738H	VNG_0738H	VNG_RS02895	hypothetical protein	VNG_RS02895
gene-VNG_0740C|VNG_0740C|VNG_0740C	VNG_0740C	VNG_RS02905	cyclase family protein	VNG_RS02905		-1.90822					-1.46642
gene-VNG_0741H|VNG_0741H|VNG_0741H	VNG_0741H	VNG_RS02910	hypothetical protein	VNG_RS02910		1.91621	-0.0568446					0.576659
gene-VNG_0742H|VNG_0742H|VNG_0742H	VNG_0742H	VNG_RS02915	hypothetical protein	VNG_RS02915		-0.784226	-0.554344				-0.844934	0.659121
gene-VNG_0743H|VNG_0743H|VNG_0743H	VNG_0743H	VNG_RS02920	universalstress protein	VNG_RS02920		-2.68315	-1.88692				-0.411281	-0.340879
gene-VNG_0745G|VNG_0745G|VNG_0745G	VNG_0745G	VNG_RS02925	SpoVR family protein	VNG_RS02925		2.18901	-0.615812				1.93643	0.912463
gene-VNG_0746C|VNG_0746C|VNG_0746C	VNG_0746C	VNG_RS02930	DUF444 family protein	VNG_RS02930		2.37012	-1.72927				2.72058	1.42289
gene-VNG_0748G|VNG_0748G|prkA2	VNG_0748G	VNG_RS02935	PrkA family serine protein kinase	VNG_RS02935		2.32518	-1.56051				2.57171	1.35804
gene-VNG_0749G|VNG_0749G|prkA1	VNG_0749G	VNG_RS02940	PrkA family serine protein kinase	VNG_RS02940		1.46516	-1.64971				1.71299	1.44595
gene-VNG_0750C|VNG_0750C|VNG_0750C	VNG_0750C	VNG_RS02945	GAF domain -containing protein	VNG_RS02945		0.52919	-0.670953				0.499362	0.744851
gene-VNG_0751C|VNG_0751C|VNG_0751C	VNG_0751C	VNG_RS02950	helix-turn-helix transcriptionalregulator	VNG_RS02950		0.648358	-0.866239				1.25702	0.301644
gene-VNG_0752G|VNG_0752G|VNG_0752G	VNG_0752G	VNG_RS02955	NAD-dependentepimerase/dehydratase family protein	VNG_RS02955		-0.926137	0.495696				-0.577453	-0.80031
gene-VNG_0753G|VNG_0753G|VNG_0753G	VNG_0753G	VNG_RS02960	inorganicphosphate transporter	VNG_RS02960		-1.59751	-0.108375				-0.322831	-1.12224
gene-VNG_0754C|VNG_0754C|VNG_0754C	VNG_0754C	VNG_RS02965	hypothetical protein	VNG_RS02965		-0.531425	0.301609				-0.870319	0.0813545
gene-VNG_0755C|VNG_0755C|trm56	VNG_0755C	VNG_RS02970	tRNA(cytidine(56)-2'-O)-methyl transferase	VNG_RS02970		-0.0337459	0.528118				-1.46642	0.948628
gene-VNG_0757G|VNG_0757G|tfeA	VNG_0757G	VNG_RS02975	transcriptionfactor	VNG_RS02975		-0.997918	0.312389		-0.567682		-1.69908	0.432846
gene-VNG_0758C|VNG_0758C|VNG_0758C	VNG_0758C	VNG_RS02980	DUF2110 family protein	VNG_RS02980		-0.594192	0.194694				-0.682914	-0.0619026
gene-VNG_0759H|VNG_0759H|VNG_0759H	VNG_0759H	VNG_RS02985	hypothetical protein	VNG_RS02985		-0.285892	-0.46672				-0.360223	0.585121
gene-VNG_0761G|VNG_0761G|VNG_0761G	VNG_0761G	VNG_RS02990	competence/damage-inducible protein A	VNG_RS02990		-0.208724	0.275731				-1.25997	0.819586
gene-VNG_0762H|VNG_0762H|VNG_0762H	VNG_0762H
gene-VNG_0763G|VNG_0763G|VNG_0763G	VNG_0763G	VNG_RS02995	undecaprenyl -diphosphatase	VNG_RS02995		1.52919						0.774599
gene-VNG_0764C|VNG_0764C|VNG_0764C	VNG_0764C	VNG_RS03000	ATP-NADkinase family protein	VNG_RS03000		0.11115	-0.79381				-0.0320193	0.98105
gene-VNG_0765H|VNG_0765H|VNG_0765H	VNG_0765H	VNG_RS03005	hypothetical protein	VNG_RS03005		2.695	1.23266				-0.144494	1.6509
gene-VNG_0766G|VNG_0766G|phoU4	VNG_0766G	VNG_RS03010	phosphateuptakeregulatorPhoU	VNG_RS03010		-0.454183	-1.60786				0.0579989	1.13975
gene-VNG_0767H|VNG_0767H|VNG_0767H	VNG_0767H	VNG_RS03015	hypothetical protein	VNG_RS03015		-0.830213	1.75051				-2.05138	-0.485268
gene-VNG_0768H|VNG_0768H|VNG_0768H	VNG_0768H	VNG_RS03020	hypothetical protein	VNG_RS03020		-0.495038	0.0426911				-0.937052	0.443393
gene-VNG_0769H|VNG_0769H|VNG_0769H	VNG_0769H	VNG_RS03025	SRPBCC family protein	VNG_RS03025		0.243788	0.393817				-0.577453	0.471494
gene-VNG_0771a|VNG_0771a|VNG_0771a	VNG_0771a	VNG_RS03035	aminoglycoside phosphotransferase	VNG_RS03035		-0.701764	-1.47188				0.155066	0.659121
gene-VNG_0771G|VNG_0771G|aldH2	VNG_0771G	VNG_RS03030	aldehydedehydrogenase family protein	VNG_RS03030		-1.36121	-0.725097				-0.184403	-0.407638
gene-VNG_0772H|VNG_0772H|VNG_0772H	VNG_0772H
gene-VNG_0775G|VNG_0775G|acd2	VNG_0775G	VNG_RS03040	acyl -CoAdehydrogenase family protein	VNG_RS03040		-2.34757	-2.26984				0.444718	-0.478382
gene-VNG_0777G|VNG_0777G|ribL	VNG_0777G	VNG_RS03045	adenyl yl transferase/cytidyl transferase family protein	VNG_RS03045		0.928286	-0.319879					0.244084
gene-VNG_0778C|VNG_0778C|VNG_0778C	VNG_0778C	VNG_RS03050	Mov34/MPN/PAD-1 family protein	VNG_RS03050		-0.0557722	1.00205				-1.31442	0.300668
gene-VNG_0779a|VNG_0779a|VNG_0779a	VNG_0779a	VNG_RS03060	phospholipase	VNG_RS03060		-0.0932469	-0.361699					-0.180414
gene-VNG_0782H|VNG_0782H|VNG_0782H	VNG_0782H	VNG_RS03065	HEATrepeat domain -containing protein	VNG_RS03065		-0.721216	0.655175		-0.5754		-0.822566	-0.509755
gene-VNG_0784G|VNG_0784G|assA	VNG_0784G	VNG_RS03070	protein sortingsystemarchaetidyl serinesynthase	VNG_RS03070			-0.471882					-0.510804
gene-VNG_0786G|VNG_0786G|hcpH	VNG_0786G	VNG_RS03075	halocyanin	VNG_RS03075		0.75475	2.16555				-1.88146	0.514732
gene-VNG_0787G|VNG_0787G|rps1e	VNG_0787G	VNG_RS03080	30Sribosomal protein S3ae	VNG_RS03080		0.0547229	1.45899		-0.405643		-0.742057	-0.618144
gene-VNG_0788H|VNG_0788H|VNG_0788H	VNG_0788H	VNG_RS03085	hypothetical protein	VNG_RS03085		0.251962	1.12373				-0.281998	-0.545698
gene-VNG_0789C|VNG_0789C|recJ2	VNG_0789C	VNG_RS03090	hypothetical protein	VNG_RS03090		0.118257	1.59085				-1.57745	0.148927
gene-VNG_0790G|VNG_0790G|rps15	VNG_0790G	VNG_RS03095	30Sribosomal protein S15	VNG_RS03095		0.18441	1.40882		-0.3709		-0.876298	-0.304042
gene-VNG_0793G|VNG_0793G|htrVI	VNG_0793G	VNG_RS03105	methyl -acceptingchemotaxis protein	VNG_RS03105		-1.64537	-1.96905				0.510009	-0.142257
gene-VNG_0794G|VNG_0794G|VNG_0794G	VNG_0794G	VNG_RS03110	BMP family protein	VNG_RS03110		-1.6447	-1.79746				-0.0773798	0.274204
gene-VNG_0795G|VNG_0795G|hcpC	VNG_0795G	VNG_RS03115	halocyanin	VNG_RS03115		-1.07503	-0.46347				-0.491513	-0.0759814
gene-VNG_0796G|VNG_0796G|metB2	VNG_0796G	VNG_RS03120	PLP-dependent transferase	VNG_RS03120		-0.931378	-1.3648				-0.241219	0.71871
gene-VNG_0798H|VNG_0798H|VNG_0798H	VNG_0798H	VNG_RS03125	Tatpathwaysignal protein	VNG_RS03125		0.480827	-0.112879				-0.523006	1.16078
gene-VNG_0799C|VNG_0799C|VNG_0799C	VNG_0799C	VNG_RS03130	ABC transporter ATP-binding protein	VNG_RS03130		1.45024	1.21617				-0.844934	1.12307
gene-VNG_0800H|VNG_0800H|VNG_0800H	VNG_0800H	VNG_RS03135	ABC transporter permease	VNG_RS03135		1.94423						1.55221
gene-VNG_0801C|VNG_0801C|tatA	VNG_0801C	VNG_RS03145	twin-arginine translocaseTatA/TatE family subunit	VNG_RS03145		-0.0771023	-0.500715				-0.202597	0.670279
gene-VNG_0804C|VNG_0804C|VNG_0804C	VNG_0804C	VNG_RS03150	HD domain -containing protein	VNG_RS03150		-0.781303	-0.577677				-0.543043	0.383487
gene-VNG_0806G|VNG_0806G|htr4	VNG_0806G	VNG_RS03155	methyl -acceptingchemotaxis protein	VNG_RS03155		-0.0942874	0.272463				-0.633879	0.311198
gene-VNG_0808G|VNG_0808G|gabD	VNG_0808G	VNG_RS03160	NAD-dependentsuccinate-semialdehydedehydrogenase	VNG_RS03160		-1.08636	-0.457383				-0.729457	0.144548
gene-VNG_0810H|VNG_0810H|VNG_0810H	VNG_0810H	VNG_RS03165	hypothetical protein	VNG_RS03165		0.868279	0.0744					0.345013
gene-VNG_0811H|VNG_0811H|VNG_0811H	VNG_0811H	VNG_RS03170	hypothetical protein	VNG_RS03170		1.87314						2.38159
gene-VNG_0812G|VNG_0812G|htr18	VNG_0812G	VNG_RS03175	methyl -acceptingchemotaxis protein	VNG_RS03175		1.08114	-0.519817				0.855506	0.789518
gene-VNG_0813G|VNG_0813G|VNG_0813G	VNG_0813G	VNG_RS03180	extracellularsolute-binding protein	VNG_RS03180		0.583638	0.631211				-0.559532	0.556028
gene-VNG_0814C|VNG_0814C|VNG_0814C	VNG_0814C	VNG_RS03185	SDR family oxidoreductase	VNG_RS03185		0.651873	0.47367				-1.25997	1.48224
gene-VNG_0815G|VNG_0815G|qor2	VNG_0815G	VNG_RS03190	NADP-dependentoxidoreductase	VNG_RS03190		-0.816154	-0.00437716		1.45006		-1.40083	0.633126
gene-VNG_0816G|VNG_0816G|chiA1	VNG_0816G	VNG_RS03195	PKD domain -containing protein	VNG_RS03195		1.27354	-1.18724				1.44047	1.06438
gene-VNG_0818C|VNG_0818C|chiA2	VNG_0818C	VNG_RS03200	PKD domain -containing protein	VNG_RS03200		1.77361	-1.30477				1.78151	1.34095
gene-VNG_0819C|VNG_0819C|chiA3	VNG_0819C	VNG_RS03205	PKD domain -containing protein	VNG_RS03205		1.05114	-0.818685				0.970983	0.942914
gene-VNG_0821C|VNG_0821C|trm9	VNG_0821C	VNG_RS03215	classISAM-dependentmethyl transferase	VNG_RS03215		-1.23014	0.422323				-0.328919	-1.27948
gene-VNG_0822C|VNG_0822C|pilC1	VNG_0822C	VNG_RS03220	typeIIsecretionsystemF family protein	VNG_RS03220		-1.15457	-1.11129				0.406521	-0.40573
gene-VNG_0823G|VNG_0823G|pilB1	VNG_0823G	VNG_RS03225	typeII/IVsecretionsystemATPasesubunit	VNG_RS03225		-1.27253	-1.22677				0.0603258	-0.0620191
gene-VNG_0824G|VNG_0824G|mobA	VNG_0824G	VNG_RS03230	molybdenumcofactorguanyl yl transferase	VNG_RS03230		-2.58629					-1.33714	0.659121
gene-VNG_0825C|VNG_0825C|mobB	VNG_0825C	VNG_RS03235	molybdopterin-guaninedinucleotidebiosynthesis protein B	mobB
gene-VNG_0826C|VNG_0826C|dmsR	VNG_0826C	VNG_RS03240	helix-turn-helix domain -containing protein	VNG_RS03240		-3.56913	-3.09553				0.225456	-0.654987
gene-VNG_0828H|VNG_0828H|VNG_0828H	VNG_0828H	VNG_RS03245	hypothetical protein	VNG_RS03245		-5.05389	-2.31988				-1.02714	-1.66281
gene-VNG_0829G|VNG_0829G|dmsA	VNG_0829G	VNG_RS03250	molybdopterin-dependentoxidoreductase	VNG_RS03250		-4.12486	-3.66329				-0.736546	0.319046
gene-VNG_0830G|VNG_0830G|dmsB	VNG_0830G	VNG_RS03255	4Fe-4Sdicluster domain -containing protein	VNG_RS03255		-4.40829	-5.83163				0.000936438	1.46648
gene-VNG_0831G|VNG_0831G|dmsC	VNG_0831G	VNG_RS03260	polysulfidereductaseNrfD	nrfD		-5.01255	-5.03412				-0.178441
gene-VNG_0832C|VNG_0832C|dmsD	VNG_0832C	VNG_RS03265	molecularchaperone	VNG_RS03265		-4.23014	-5.64181				0.21165
gene-VNG_0834C|VNG_0834C|VNG_0834C	VNG_0834C	VNG_RS03270	DUF106 domain -containing protein	VNG_RS03270		-0.607349	-0.752838				0.0868315	0.102728
gene-VNG_0835a|VNG_0835a|VNG_0835a	VNG_0835a	VNG_RS03280	hypothetical protein	VNG_RS03280
gene-VNG_0835b|VNG_0835b|VNG_0835b	VNG_0835b	VNG_RS03285	hypothetical protein	VNG_RS03285
gene-VNG_0835G|VNG_0835G|idr2	VNG_0835G	VNG_RS03275	metal-dependent transcriptionalregulator	VNG_RS03275		-1.01925						-0.340879
gene-VNG_0836H|VNG_0836H|VNG_0836H	VNG_0836H	VNG_RS13290	hypothetical protein	VNG_RS13290
gene-VNG_0837H|VNG_0837H|VNG_0837H	VNG_0837H	VNG_RS03290	hypothetical protein	VNG_RS03290
gene-VNG_0838G|VNG_0838G|VNG_0838G	VNG_0838G	VNG_RS03295	tyrosine-typerecombinase/integrase	VNG_RS03295		-0.685823	-0.0568446				-0.88146	0.296551
gene-VNG_0841G|VNG_0841G|cynT	VNG_0841G	VNG_RS03305	IcfA	VNG_RS03305		-0.823326	-0.857536				-0.434001	0.51228
gene-VNG_0845C|VNG_0845C|VNG_0845C	VNG_0845C	VNG_RS03310	methyl transferase domain -containing protein	VNG_RS03310		1.49172	0.817625					0.447617
gene-VNG_0846C|VNG_0846C|VNG_0846C	VNG_0846C	VNG_RS03315	HTTM domain -containing protein	VNG_RS03315		-0.988385	-0.24949				-0.353947	-0.340879
gene-VNG_0847H|VNG_0847H|VNG_0847H	VNG_0847H	VNG_RS03320	hypothetical protein	VNG_RS03320		-0.597013	-1.11456				0.451116	0.110501
gene-VNG_0849C|VNG_0849C|VNG_0849C	VNG_0849C	VNG_RS03325	hypothetical protein	VNG_RS03325		-1.60913	-2.13279		-1.03593		-0.0214831	0.589219
gene-VNG_0851C|VNG_0851C|VNG_0851C	VNG_0851C	VNG_RS03330	MBLfoldmetallo-hydrolase	VNG_RS03330		-0.456226	-0.358014				-0.348852	0.29471
gene-VNG_0852C|VNG_0852C|VNG_0852C	VNG_0852C	VNG_RS03335	helix-turn-helix domain -containing protein	VNG_RS03335		-1.54976	-1.4008				0.614498	-0.71939
gene-VNG_0853C|VNG_0853C|VNG_0853C	VNG_0853C	VNG_RS03340	yl bF family regulator	VNG_RS03340		-0.0358976	-0.641807		-1.17169		-0.320344	0.970323
gene-VNG_0854C|VNG_0854C|dph2	VNG_0854C	VNG_RS03345	diphthamidebiosynthesisenzymeDph2	dph2		1.03635	1.05863				-0.536811	0.558595
gene-VNG_0857C|VNG_0857C|VNG_0857C	VNG_0857C	VNG_RS03350	methyltransferase	VNG_RS03350		1.11415	0.791152					0.189636
gene-VNG_0858C|VNG_0858C|VNG_0858C	VNG_0858C	VNG_RS03355	rhomboid family intramembraneserineprotease	VNG_RS03355		-0.319772	0.312389				-0.668056	0.0799646
gene-VNG_0860G|VNG_0860G|rpoL	VNG_0860G	VNG_RS03360	DNA-directedRNApolymerasesubunitL	VNG_RS03360		-0.434284	0.791152				-1.21488	0.033517
gene-VNG_0861H|VNG_0861H|VNG_0861H	VNG_0861H	VNG_RS03370	universal stress protein	VNG_RS03370		-1.01925						-0.0189504
gene-VNG_0862G|VNG_0862G|hisF	VNG_0862G	VNG_RS03365	imidazoleglycerolphosphatesynthasesubunitHisF	hisF		-0.249252	0.60612				-0.392422	-0.418881
gene-VNG_0863H|VNG_0863H|VNG_0863H	VNG_0863H	VNG_RS14180	hypothetical protein	VNG_RS14180			1.05863					-1.04132
gene-VNG_0864G|VNG_0864G|purL	VNG_0864G	VNG_RS03375	phosphoribosyl formyl glycinamidinesynthasesubunitPurL	purL		-1.49987	-0.512524				-0.899382	-0.0438968
gene-VNG_0865C|VNG_0865C|VNG_0865C	VNG_0865C	VNG_RS03380	PHP domain -containing protein	VNG_RS03380		-0.249252	0.21879				-0.144494	-0.279478
gene-VNG_0867G|VNG_0867G|asnB	VNG_0867G	VNG_RS03385	asparaginesynthetaseB	VNG_RS03385		-0.538981	0.0102696				-0.659067	0.153886
gene-VNG_0868H|VNG_0868H|VNG_0868H	VNG_0868H	VNG_RS03390	NUDIXhydrolase	VNG_RS03390
gene-VNG_0869G|VNG_0869G|tfbD	VNG_0869G	VNG_RS03395	transcriptioninitiationfactorIIB	VNG_RS03395		2.24829	1.60612				-0.466422	1.15266
gene-VNG_0870G|VNG_0870G|gatC	VNG_0870G	VNG_RS03400	Asp-tRNA(Asn)/Glu-tRNA(Gln)amido transferasesubunitGatC	gatC		0.735641	1.04625				-0.296497	0.0299592
gene-VNG_0872G|VNG_0872G|gatA	VNG_0872G	VNG_RS03405	Asp-tRNA(Asn)/Glu-tRNA(Gln)amido transferasesubunitGatA	gatA		0.698913	0.183106				0.0540517	0.505825
gene-VNG_0873G|VNG_0873G|VNG_0873G	VNG_0873G	VNG_RS03410	acyl -CoAthioesterase	VNG_RS03410
gene-VNG_0874G|VNG_0874G|traB	VNG_0874G	VNG_RS03415	TraB/GumN family protein	VNG_RS03415		-1.73953	-1.82238				-0.483296	0.610212
gene-VNG_0875C|VNG_0875C|VNG_0875C	VNG_0875C	VNG_RS03420	Zn-dependent protease	VNG_RS03420
gene-VNG_0876G|VNG_0876G|purM	VNG_0876G	VNG_RS03425	phosphoribosyl formyl glycinamidinecyclo-ligase	VNG_RS03425		-2.43428					-0.729457	-0.0189504
gene-VNG_0878G|VNG_0878G|VNG_0878G	VNG_0878G	VNG_RS03430	CBS domain-containing protein	VNG_RS03430		-0.313268	0.194694				-0.337139	-0.126754
gene-VNG_0879C|VNG_0879C|VNG_0879C	VNG_0879C	VNG_RS03435	DUF555 domain -containing protein	VNG_RS03435		0.883198	1.48748				-0.844934	0.284726
gene-VNG_0880G|VNG_0880G|psmB	VNG_0880G	VNG_RS03440	archaealproteasomeendopeptidasecomplexsubunitbeta	psmB		1.15068	0.444743				-0.0231877	0.773193
gene-VNG_0881G|VNG_0881G|ligB	VNG_0881G	VNG_RS03445	ATP-dependentDNAligase	VNG_RS03445		1.13861	0.706116				-0.270025	0.746584
gene-VNG_0882G|VNG_0882G|VNG_0882G	VNG_0882G	VNG_RS03450	HAD-IIA family hydrolase	VNG_RS03450		1.28818	1.68012					0.796625
gene-VNG_0883H|VNG_0883H|VNG_0883H	VNG_0883H	VNG_RS03455	MBLfoldmetallo-hydrolase	VNG_RS03455		0.343324	1.16555					0.173695
gene-VNG_0884G|VNG_0884G|top6A	VNG_0884G	VNG_RS03460	DNAtopoisomeraseIVsubunitA	VNG_RS03460		2.31725	0.882664				0.897941	0.580715
gene-VNG_0885G|VNG_0885G|top6B	VNG_0885G	VNG_RS03465	DNAtopoisomeraseVIsubunitB	VNG_RS03465		1.92678	0.907927				0.296079	0.766847
gene-VNG_0887G|VNG_0887G|gyrB	VNG_0887G	VNG_RS03470	DNAtopoisomerase(ATP-hydrolyzing)subunitB	gyrB		0.300704	-0.28312				-0.380122	1.00802
gene-VNG_0889G|VNG_0889G|gyrA	VNG_0889G	VNG_RS03475	DNAgyrasesubunitA	gyrA		0.551217	0.0164044				-0.0513846	0.630267
gene-VNG_0890G|VNG_0890G|VNG_0890G	VNG_0890G	VNG_RS03480	Rrf2 family transcriptionalregulator	VNG_RS03480		-0.355212	-0.281405				-0.0847878	0.0550502
gene-VNG_0891G|VNG_0891G|ndh	VNG_0891G	VNG_RS03485	NAD(P)/FAD-dependentoxidoreductase	VNG_RS03485		0.42898	0.887121				-0.5698	0.155728
gene-VNG_0892a|VNG_0892a|VNG_0892a	VNG_0892a	VNG_RS03490	GrpB family protein	VNG_RS03490		1.18239	1.11308					0.427796
gene-VNG_0892H|VNG_0892H|VNG_0892H	VNG_0892H	VNG_RS14185	hypothetical protein	VNG_RS14185		-0.171249	1.68012					-0.0778441
gene-VNG_0893G|VNG_0893G|udp2	VNG_0893G	VNG_RS03495	nucleosidephosphoryl ase	VNG_RS03495		-0.0492589	-0.194348				0.227475	-0.0383157
gene-VNG_0896G|VNG_0896G|cdd	VNG_0896G	VNG_RS03500	cytidinedeaminase	cdd		0.221068	2.81762					-0.407993
gene-VNG_0897G|VNG_0897G|tsgC	VNG_0897G	VNG_RS03505	ABC transporter permease	VNG_RS03505		0.580071	0.412641				-0.350945	0.562445
gene-VNG_0898G|VNG_0898G|tsgB	VNG_0898G	VNG_RS03510	ABC transporter permease	VNG_RS03510		1.01638	0.664854				0.348546	0.0470472
gene-VNG_0901G|VNG_0901G|tsgD	VNG_0901G	VNG_RS03515	ABC transporter ATP-binding protein	VNG_RS03515		0.419638	1.00456				-0.960782	0.419934
gene-VNG_0903C|VNG_0903C|tsgA	VNG_0903C	VNG_RS03520	BMP family protein	VNG_RS03520		0.231188	1.17762				-0.902521	0.000158415
gene-VNG_0905G|VNG_0905G|pmm3	VNG_0905G	VNG_RS03525	phosphopentomutase/phosphoglucosaminemutase	VNG_RS03525		0.42413	0.323428				-0.275739	0.420511
gene-VNG_0906H|VNG_0906H|VNG_0906H	VNG_0906H	VNG_RS03530	hypothetical protein	VNG_RS03530		0.158899	0.326484				-0.335178	0.211663
gene-VNG_0907H|VNG_0907H|VNG_0907H	VNG_0907H	VNG_RS14190	hypothetical protein	VNG_RS14190
gene-VNG_0908G|VNG_0908G|VNG_0908G	VNG_0908G	VNG_RS03535	sodium/prolinesymporter	VNG_RS03535		0.101769	0.990461				-0.407528	-0.437094
gene-VNG_0909H|VNG_0909H|VNG_0909H	VNG_0909H	VNG_RS03540	hypothetical protein	VNG_RS03540		2.28818						-0.0513719
gene-VNG_0911H|VNG_0911H|VNG_0911H	VNG_0911H	VNG_RS03545	hypothetical protein	VNG_RS03545		-0.382754	1.05863				-1.60393	0.206609
gene-VNG_0913H|VNG_0913H|VNG_0913H	VNG_0913H	VNG_RS03550	hypothetical protein	VNG_RS03550		0.169787	0.327819				-0.466422	0.35246
gene-VNG_0914H|VNG_0914H|VNG_0914H	VNG_0914H	VNG_RS03555	iron transporter	VNG_RS03555		0.373071	2.56765				-2.72946	0.578951
gene-VNG_0915G|VNG_0915G|kynU	VNG_0915G	VNG_RS03560	kynureninase	VNG_RS03560		-1.95975	-1.11129				-0.222497	-0.581887
gene-VNG_0916G|VNG_0916G|VNG_0916G	VNG_0916G	VNG_RS03565	PAS domain S-box protein	VNG_RS03565		2.15068	1.63121					0.708031
gene-VNG_0917G|VNG_0917G|VNG_0917G	VNG_0917G	VNG_RS03570	responseregulator	VNG_RS03570		1.41371						0.803511
gene-VNG_0919G|VNG_0919G|gtl6	VNG_0919G	VNG_RS03580	glycosyl transferase family 2 protein	VNG_RS03580		1.15068						0.758657
gene-VNG_0920H|VNG_0920H|VNG_0920H	VNG_0920H	VNG_RS03585	glycosyl transferase family 39 protein	VNG_RS03585		0.735641	1.86915				-0.237603	-0.85184
gene-VNG_0921G|VNG_0921G|VNG_0921G	VNG_0921G	VNG_RS03590	ABC transporter ATP-binding protein	VNG_RS03590		0.344004	0.727427				0.17198	-0.511332
gene-VNG_0923G|VNG_0923G|VNG_0923G	VNG_0923G	VNG_RS03595	ironABC transporter permease	VNG_RS03595		1.34812	0.663048				1.03608	-0.306931
gene-VNG_0924G|VNG_0924G|VNG_0924G	VNG_0924G	VNG_RS03600	ironABC transporter substrate-binding protein	VNG_RS03600		1.75475	1.03108				1.14239	-0.374649
gene-VNG_0925C|VNG_0925C|VNG_0925C	VNG_0925C	VNG_RS03605	hypothetical protein	VNG_RS03605		1.09178	-0.28817				1.11854	0.305485
gene-VNG_0926H|VNG_0926H|VNG_0926H	VNG_0926H
gene-VNG_0927C|VNG_0927C|VNG_0927C	VNG_0927C	VNG_RS03610	hypothetical protein	VNG_RS03610		1.51057	0.760291				0.0778984	0.716455
gene-VNG_0928G|VNG_0928G|VNG_0928G	VNG_0928G	VNG_RS03615	MAPK-activated protein kinase	VNG_RS03615		0.247464	1.86069				-2.17424	0.605082
gene-VNG_0930G|VNG_0930G|VNG_0930G	VNG_0930G	VNG_RS03620	LLMclassflavin-dependentoxidoreductase	VNG_RS03620		4.33125	2.56765					1.53713
gene-VNG_0931G|VNG_0931G|acaB2	VNG_0931G	VNG_RS03625	3-ketoacyl -CoAthiolase	VNG_RS03625		0.430991	-0.201234		1.2893		0.0951764	0.581119
gene-VNG_0932C|VNG_0932C|VNG_0932C	VNG_0932C	VNG_RS03630	Zn-ribbon domain -containingOB-fold protein	VNG_RS03630		-0.284906	0.528118				-1.18889	0.419934
gene-VNG_0933G|VNG_0933G|VNG_0933G	VNG_0933G	VNG_RS03635	NADH:flavinoxidoreductase/NADHoxidase	VNG_RS03635		2.58774	1.81762				-0.844934	1.65912
gene-VNG_0934H|VNG_0934H|VNG_0934H	VNG_0934H	VNG_RS14195	hypothetical protein	VNG_RS14195		3.07668	2.05863					0.943575
gene-VNG_0935G|VNG_0935G|VNG_0935G	VNG_0935G	VNG_RS03640	nitroreductase family protein	VNG_RS03640		3.70158	3.03062		1.39769		-1.46642	2.18145
gene-VNG_0936C|VNG_0936C|VNG_0936C	VNG_0936C	VNG_RS03645	hydrolase	VNG_RS03645
gene-VNG_0937G|VNG_0937G|aldH3	VNG_0937G	VNG_RS03650	aldehydedehydrogenase	VNG_RS03650		-3.47242	-0.904841				-2.66806	0.144548
gene-VNG_0938G|VNG_0938G|gufA	VNG_0938G	VNG_RS03655	ZIP family metal transporter	VNG_RS03655		-2.17125	-1.37877				-0.407528	-0.340879
gene-VNG_0940G|VNG_0940G|acdA	VNG_0940G	VNG_RS03660	acetate--CoAligase family protein	VNG_RS03660		0.15535	0.104906		-0.635764		0.206768	-0.112254
gene-VNG_0941C|VNG_0941C|VNG_0941C	VNG_0941C	VNG_RS03665	phospho transacetyl ase family protein	VNG_RS03665		-0.38943	-0.498849				0.192541	-0.0390516
gene-VNG_0942G|VNG_0942G|cheW2	VNG_0942G	VNG_RS03670	purine-bindingchemotaxis protein CheW	VNG_RS03670		-0.956237	-0.397881				-0.703921	0.189636
gene-VNG_0943C|VNG_0943C|VNG_0943C	VNG_0943C	VNG_RS03675	helix-turn-helix transcriptionalregulator	VNG_RS03675		-0.849321	-0.127234				-0.337139	-0.340879
gene-VNG_0945H|VNG_0945H|VNG_0945H	VNG_0945H	VNG_RS03680	hypothetical protein	VNG_RS03680		-0.533819	0.77323				-1.72946	0.466476
gene-VNG_0946G|VNG_0946G|parA1	VNG_0946G	VNG_RS03685	MinD/ParA family protein	VNG_RS03685		-1.05407	-1.38174				0.172988	0.19876
gene-VNG_0947G|VNG_0947G|arlJ	VNG_0947G	VNG_RS03690	archaellarassembly protein FlaJ	flaJ		0.237556	-0.921915				1.08499	0.118553
gene-VNG_0949G|VNG_0949G|arlI	VNG_0949G	VNG_RS03695	typeII/IVsecretionsystemATPasesubunit	VNG_RS03695		-1.46426	-1.49336				0.194412	-0.121237
gene-VNG_0950a|VNG_0950a|arlG	VNG_0950a					-0.405715	-0.963735				0.533578	0.0685124
gene-VNG_0950G|VNG_0950G|arlH	VNG_0950G	VNG_RS03700	ATPase	VNG_RS03700		-1.32149	-1.3555				-0.294737	0.372817
gene-VNG_0953C|VNG_0953C|arlF	VNG_0953C	VNG_RS03710	hypothetical protein	VNG_RS03710		-0.856376	-0.565858				-0.292593	0.0461446
gene-VNG_0954C|VNG_0954C|arlCE	VNG_0954C	VNG_RS03715	hypothetical protein	VNG_RS03715		-1.38537	-1.5158				-0.19512	0.369615
gene-VNG_0955G|VNG_0955G|arlD	VNG_0955G	VNG_RS03720	flagellaE	VNG_RS03720		-0.924894	-1.11885				0.362097	-0.124067
gene-VNG_0958G|VNG_0958G|htr15	VNG_0958G	VNG_RS03725	PAS domain -containing protein	VNG_RS03725		-1.38613	-1.34436				0.0157724	-0.0134753
gene-VNG_0959H|VNG_0959H|VNG_0959H	VNG_0959H	VNG_RS03730	hypothetical protein	VNG_RS03730		0.0213957	1.26508					-0.247769
gene-VNG_0960G|VNG_0960G|arlB1	VNG_0960G	VNG_RS03735	flagellin	VNG_RS03735		-1.61149	-1.71699		-1.15104		0.249101	-0.0995279
gene-VNG_0961G|VNG_0961G|arlB2	VNG_0961G	VNG_RS03740	flagellin	VNG_RS03740		-1.82144	-1.85148		-3.45166		0.154123	-0.0800119
gene-VNG_0962G|VNG_0962G|arlB3	VNG_0962G	VNG_RS03745	flagellin	VNG_RS03745		-1.727	-1.92959		-1.73889		0.360241	-0.113576
gene-VNG_0963G|VNG_0963G|VNG_0963G	VNG_0963G	VNG_RS03750	HEATrepeat domain -containing protein	VNG_RS03750		-0.188713	0.156986				-0.290509	-0.0111203
gene-VNG_0964C|VNG_0964C|cheF1	VNG_0964C	VNG_RS03755	CheF family chemotaxis protein	VNG_RS03755		-0.0986216	-0.0106744				-0.310504	0.266627
gene-VNG_0965C|VNG_0965C|cheF2	VNG_0965C	VNG_RS03760	CheF family chemotaxis protein	VNG_RS03760		-0.107119	-0.424216				0.0149842	0.346182
gene-VNG_0966G|VNG_0966G|cheR	VNG_0966G	VNG_RS03765	protein -glutamateO-methyl transferaseCheR	VNG_RS03765		0.272669	-0.533747				0.259896	0.59059
gene-VNG_0967G|VNG_0967G|cheD	VNG_0967G	VNG_RS03770	chemotaxis protein CheD	VNG_RS03770		-0.201623	-1.21554				1.27054	-0.212554
gene-VNG_0969H|VNG_0969H|cheC3	VNG_0969H	VNG_RS03775	chemotaxis protein CheC	VNG_RS03775		-0.615433	-1.14356				0.533578	0.0386149
gene-VNG_0970G|VNG_0970G|cheC1	VNG_0970G	VNG_RS03780	chemotaxis protein CheC	VNG_RS03780		-0.749786	-1.11234				0.776072	-0.369448
gene-VNG_0971G|VNG_0971G|cheA	VNG_0971G	VNG_RS03785	chemotaxis protein CheA	VNG_RS03785		-1.09128	-1.41011				0.427956	-0.0650579
gene-VNG_0973G|VNG_0973G|cheB	VNG_0973G	VNG_RS03790	chemotaxis protein CheB	VNG_RS03790		-1.17125	-0.996724				-0.189818	0.059362
gene-VNG_0974G|VNG_0974G|cheY	VNG_0974G	VNG_RS03795	responseregulator	VNG_RS03795		-0.550308	-0.501877				-0.434001	0.42964
gene-VNG_0976G|VNG_0976G|cheW1	VNG_0976G	VNG_RS03800	purine-bindingchemotaxis protein CheW	VNG_RS03800		0.957484	-0.0568446				-0.0879105	1.14631
gene-VNG_0978H|VNG_0978H|VNG_0978H	VNG_0978H	VNG_RS03805	hypothetical protein	VNG_RS03805		0.317897	-0.274075				-0.565337	1.20138
gene-VNG_0979H|VNG_0979H|VNG_0979H	VNG_0979H	VNG_RS03810	hypothetical protein	VNG_RS03810		-0.586287					-0.88146	0.98105
gene-VNG_0981C|VNG_0981C|aat1	VNG_0981C	VNG_RS03815	pyridoxalphosphate-dependentamino transferase	VNG_RS03815		-0.460756					-1.01896	0.829046
gene-VNG_0982C|VNG_0982C|VNG_0982C	VNG_0982C	VNG_RS03820	PRC-barrel domain -containing protein	VNG_RS03820		-0.711818	-0.0568446				-0.559532	-0.0513719
gene-VNG_0983C|VNG_0983C|VNG_0983C	VNG_0983C	VNG_RS03825	NAD-binding protein	VNG_RS03825		-0.171249	0.156559				-0.144494	-0.139245
gene-VNG_0985a|VNG_0985a|VNG_0985a	VNG_0985a	VNG_RS03840	hypothetical protein	VNG_RS03840		2.41371						0.659121
gene-VNG_0985H|VNG_0985H|VNG_0985H	VNG_0985H	VNG_RS03835	hypothetical protein	VNG_RS03835		0.506822	0.860693					-0.428341
gene-VNG_0986H|VNG_0986H|VNG_0986H	VNG_0986H	VNG_RS03845	SWIMzincfinger family protein	VNG_RS03845
gene-VNG_0987a|VNG_0987a|VNG_0987a	VNG_0987a
gene-VNG_0987H|VNG_0987H|VNG_0987H	VNG_0987H	VNG_RS13295	hypothetical protein	VNG_RS13295		-2.08879	-0.52633				-0.646994	-0.871393
gene-VNG_0988H|VNG_0988H|VNG_0988H	VNG_0988H	VNG_RS13300	DUF2085 domain-containing protein	VNG_RS13300
gene-VNG_0989C|VNG_0989C|VNG_0989C	VNG_0989C	VNG_RS03850	site-specificintegrase	VNG_RS03850		2.28818	0.860693					0.0310903
gene-VNG_0990H|VNG_0990H|VNG_0990H	VNG_0990H	VNG_RS14200	hypothetical protein	VNG_RS14200
gene-VNG_0991H|VNG_0991H|VNG_0991H	VNG_0991H	VNG_RS03855	hypothetical protein	VNG_RS03855		-2.46543	-2.75728				0.191373	0.144548
gene-VNG_0992H|VNG_0992H|VNG_0992H	VNG_0992H	VNG_RS03860	hypothetical protein	VNG_RS03860		-2.30249	-2.96374				0.461227	0.244084
gene-VNG_0993H|VNG_0993H|VNG_0993H	VNG_0993H	VNG_RS03865	hypothetical protein	VNG_RS03865
gene-VNG_0994b|VNG_0994b|VNG_0994b	VNG_0994b						-5.88973				0.644002
gene-VNG_0995H|VNG_0995H|VNG_0995H	VNG_0995H	VNG_RS03870	hypothetical protein	VNG_RS03870		-4.58629	-4.78526				0.388001	-0.144958
gene-VNG_0996G|VNG_0996G|boa4	VNG_0996G	VNG_RS03875	helix-turn-helix domain -containing protein	VNG_RS03875		-3.68221	-3.67076				-0.323942	0.356559
gene-VNG_0997G|VNG_0997G|acs2	VNG_0997G	VNG_RS03880	acetate--CoAligase	acs		-5.09477	-5.82822				0.452817	0.324702
gene-VNG_0998G|VNG_0998G|VNG_0998G	VNG_0998G	VNG_RS03885	aldo/ketoreductase	VNG_RS03885		0.935666	0.135801				-0.0375788	0.881514
gene-VNG_0999a|VNG_0999a|VNG_0999a	VNG_0999a	VNG_RS03895	hypothetical protein	VNG_RS03895		0.676747						0.244084
gene-VNG_0999H|VNG_0999H|VNG_0999H	VNG_0999H	VNG_RS03890	hypothetical protein	VNG_RS03890		-1.92332	-1.73492				-0.144494	0.000158415
gene-VNG_1000H|VNG_1000H|VNG_1000H	VNG_1000H	VNG_RS03900	DUF2061 domain -containing protein	VNG_RS03900		0.998676	0.528118					0.659121
gene-VNG_1001G|VNG_1001G|guaB1	VNG_1001G	VNG_RS03905	IMPdehydrogenase	guaB		0.0612601	-0.287274				-0.680547	1.07315
gene-VNG_1002H|VNG_1002H|VNG_1002H	VNG_1002H	VNG_RS03910	hypothetical protein	VNG_RS03910		-1.52841	-1.43827				-0.348027	0.301965
gene-VNG_1003H|VNG_1003H|VNG_1003H	VNG_1003H	VNG_RS03915	hypothetical protein	VNG_RS03915		0.887644	-0.641807					0.718015
gene-VNG_1005H|VNG_1005H|VNG_1005H	VNG_1005H	VNG_RS03920	hypothetical protein	VNG_RS03920
gene-VNG_1006H|VNG_1006H|VNG_1006H	VNG_1006H	VNG_RS13310	hypothetical protein	VNG_RS13310		2.30268	1.26508					0.811125
gene-VNG_1007a|VNG_1007a|VNG_1007a	VNG_1007a
gene-VNG_1008G|VNG_1008G|arlA1	VNG_1008G	VNG_RS03935	flagellin	VNG_RS03935		-2.99141	-2.88116				0.371857	-0.438039
gene-VNG_1009G|VNG_1009G|arlA2	VNG_1009G	VNG_RS03940	flagellin	VNG_RS03940		-3.03136	-2.94367		-2.30972		0.206519	-0.250137
gene-VNG_1011C|VNG_1011C|arfA1	VNG_1011C	VNG_RS03945	GTPcyclohydrolaseIIa	VNG_RS03945		0.0787288	-0.316137		0.952408		0.912839	-0.473904
gene-VNG_1012H|VNG_1012H|grx5	VNG_1012H	VNG_RS03950	glutaredoxin	VNG_RS03950		2.76892	1.17411				0.11854	1.52034
gene-VNG_1013G|VNG_1013G|htrXIII	VNG_1013G	VNG_RS03955	methyl -acceptingchemotaxis protein	VNG_RS03955		1.9869	0.391616	0.649			0.497954	1.1414
gene-VNG_1014G|VNG_1014G|polY	VNG_1014G	VNG_RS03960	DNApolymeraseIV	dinB		-0.393642	-1.4898				1.21808	-0.0778441
gene-VNG_1015H|VNG_1015H|VNG_1015H	VNG_1015H	VNG_RS03965	hypothetical protein	VNG_RS03965		-0.0557722						0.552206
gene-VNG_1017H|VNG_1017H|gth8	VNG_1017H	VNG_RS03970	glycosyl transferase	VNG_RS03970		-2.06433	-0.98973				-1.03758	0.0070448
gene-VNG_1018G|VNG_1018G|VNG_1018G	VNG_1018G	VNG_RS03975	aldo/ketoreductase	VNG_RS03975		-1.19954	-0.396051				-0.701712	-0.0577065
gene-VNG_1020C|VNG_1020C|pgsA1	VNG_1020C	VNG_RS03980	CDP-alcoholphosphatidyl transferase family protein	VNG_RS03980		-0.56244	0.6477				-1.2965	0.130427
gene-VNG_1021C|VNG_1021C|arfA2	VNG_1021C	VNG_RS03985	GTPcyclohydrolaseIIa	VNG_RS03985		0.547569	-0.610098				0.762397	0.43934
gene-VNG_1023C|VNG_1023C|adh6	VNG_1023C	VNG_RS03990	zinc-bindingalcoholdehydrogenase	VNG_RS03990		0.247464	-0.191146				0.147687	0.334992
gene-VNG_1024C|VNG_1024C|VNG_1024C	VNG_1024C	VNG_RS03995	6-carboxytetrahydropterinsynthase	VNG_RS03995		0.975592	-0.292223				1.00235	0.309537
gene-VNG_1025H|VNG_1025H|VNG_1025H	VNG_1025H	VNG_RS04000	methyl transferase domain -containing protein	VNG_RS04000		0.864374	-0.811732				0.703503	1.01667
gene-VNG_1026H|VNG_1026H|VNG_1026H	VNG_1026H	VNG_RS04005	hypothetical protein	VNG_RS04005		2.15068	0.943155					0.98105
gene-VNG_1027G|VNG_1027G|tpiA	VNG_1027G	VNG_RS04010	triose-phosphateisomerase	tpiA		1.52919	-0.554344				0.533578	1.59403
gene-VNG_1029C|VNG_1029C|VNG_1029C	VNG_1029C	VNG_RS04015	TIGR00270 family protein	VNG_RS04015		0.341922	-0.332479				-0.307433	1.0259
gene-VNG_1030G|VNG_1030G|agsA	VNG_1030G	VNG_RS04020	CDP-alcoholphosphatidyl transferase family protein	VNG_RS04020		0.551217	1.81762				-1.46642	0.244084
gene-VNG_1031C|VNG_1031C|adk2	VNG_1031C	VNG_RS04025	AAA family ATPase	VNG_RS04025		0.27621	-0.0173162				-0.0189631	0.356559
gene-VNG_1033G|VNG_1033G|hisC	VNG_1033G	VNG_RS04030	histidinol-phosphate transaminase	VNG_RS04030		0.237556	-0.0892661				-0.0955844	0.466476
gene-VNG_1034H|VNG_1034H|VNG_1034H	VNG_1034H	VNG_RS04035	hypothetical protein	VNG_RS04035		-0.527393	0.817625				-1.14449	-0.156454
gene-VNG_1035C|VNG_1035C|VNG_1035C	VNG_1035C	VNG_RS04040	GMC family oxidoreductase	VNG_RS04040		2.35231	0.317551				1.44047	0.638363
gene-VNG_1036H|VNG_1036H|VNG_1036H	VNG_1036H	VNG_RS04045	gluconate2-dehydrogenasesubunit3 family protein	VNG_RS04045		2.28818						0.311198
gene-VNG_1037G|VNG_1037G|hpcE	VNG_1037G	VNG_RS04050	fumaryl acetoacetatehydrolase family protein	VNG_RS04050
gene-VNG_1038C|VNG_1038C|VNG_1038C	VNG_1038C	VNG_RS04055	metal-dependenthydrolase	VNG_RS04055		-0.502166	-0.585954				-0.227483	0.355341
gene-VNG_1039H|VNG_1039H|VNG_1039H	VNG_1039H	VNG_RS04060	hypothetical protein	VNG_RS04060		-2.45813	-2.87447				0.479358	-0.0189504
gene-VNG_1041a|VNG_1041a|VNG_1041a	VNG_1041a					1.52797	-0.0964815				0.290226	1.3783
gene-VNG_1041H|VNG_1041H|VNG_1041H	VNG_1041H	VNG_RS04065	OsmC family protein	VNG_RS04065		1.41371	-0.98973					0.784652
gene-VNG_1042H|VNG_1042H|VNG_1042H	VNG_1042H	VNG_RS04070	hypothetical protein	VNG_RS04070		1.28818	-0.11456				0.242529	1.20428
gene-VNG_1046H|VNG_1046H|VNG_1046H	VNG_1046H	VNG_RS04075	hypothetical protein	VNG_RS04075		1.92391	1.23266				-0.0189631	0.754279
gene-VNG_1047H|VNG_1047H|VNG_1047H	VNG_1047H	VNG_RS14205	hypothetical protein	VNG_RS14205		1.41371	0.428582					0.659121
gene-VNG_1048G|VNG_1048G|aglM1	VNG_1048G	VNG_RS04080	UDP-glucose/GDP-mannosedehydrogenase family protein	VNG_RS04080		-0.282895	-0.641807				-0.11412	0.517102
gene-VNG_1050H|VNG_1050H|VNG_1050H	VNG_1050H	VNG_RS04085	TRAM domain -containing protein	VNG_RS04085
gene-VNG_1052H|VNG_1052H|VNG_1052H	VNG_1052H	VNG_RS04090	hypothetical protein	VNG_RS04090		0.817069	-0.773911				0.223238	1.41181
gene-VNG_1053G|VNG_1053G|aglJ	VNG_1053G	VNG_RS04095	S-layerglyco protein N-glycosyl transferaseAglJ	aglJ		-1.95975	-1.31988				0.192541	-0.788337
gene-VNG_1054G|VNG_1054G|aglR	VNG_1054G	VNG_RS04100	lipopolysaccharidebiosynthesis protein	VNG_RS04100		0.480827	0.165548					0.311198
gene-VNG_1055G|VNG_1055G|aglF2	VNG_1055G	VNG_RS04105	sugarnucleotidyl transferase	VNG_RS04105		0.0825072	-1.05684				0.476994	0.706427
gene-VNG_1056C|VNG_1056C|VNG_1056C	VNG_1056C	VNG_RS04110	hypothetical protein	VNG_RS04110		0.991689	0.809889				0.419407	-0.193537
gene-VNG_1057C|VNG_1057C|VNG_1057C	VNG_1057C	VNG_RS04115	sulfatase-likehydrolase/ transferase	VNG_RS04115		-0.621415	-0.245878				-0.496479	0.165012
gene-VNG_1058H|VNG_1058H|aglQ	VNG_1058H	VNG_RS04120	hypothetical protein	VNG_RS04120		-0.241639	1.01531				-0.421334	-0.79154
gene-VNG_1059C|VNG_1059C|gth7	VNG_1059C	VNG_RS04125	glycosyl transferase family 4 protein	VNG_RS04125		0.023398	-0.679282				0.649055	0.0976945
gene-VNG_1060H|VNG_1060H|VNG_1060H	VNG_1060H	VNG_RS04130	FkbM family methyl transferase	VNG_RS04130		2.38947	-0.398951				1.85551	0.97698
gene-VNG_1062G|VNG_1062G|aglE	VNG_1062G	VNG_RS04135	glycosyl transferase family 2 protein	VNG_RS04135		1.35927	0.631211					0.50158
gene-VNG_1063H|VNG_1063H|VNG_1063H	VNG_1063H	VNG_RS04140	hypothetical protein	VNG_RS04140		-1.25871	-1.96374				0.312364	0.436729
gene-VNG_1065C|VNG_1065C|VNG_1065C	VNG_1065C	VNG_RS04150	FkbM family methyl transferase	VNG_RS04150		3.15068						1.39609
gene-VNG_1066C|VNG_1066C|aglI	VNG_1066C	VNG_RS04155	glycosyl transferase	VNG_RS04155		1.49172	2.44566					-0.180414
gene-VNG_1067G|VNG_1067G|aglG	VNG_1067G	VNG_RS04160	glycosyl transferase family 2 protein	VNG_RS04160		-0.278165	1.31755				-0.781924	-0.769722
gene-VNG_1068G|VNG_1068G|aglB	VNG_1068G	VNG_RS04165	oligosaccharyl transferase,archaeosortaseAsystem-associated	VNG_RS04165		-1.00006	0.352169				-0.226288	-1.08187
gene-VNG_1069C|VNG_1069C|VNG_1069C	VNG_1069C	VNG_RS04170	DUF368 domain -containing protein	VNG_RS04170		-0.264359	0.47367					-0.134428
gene-VNG_1070G|VNG_1070G|glpA2	VNG_1070G	VNG_RS04175	FAD-dependent oxidoreductase	VNG_RS04175		1.28818	0.680121				0.11854	0.533591
gene-VNG_1071G|VNG_1071G|tfeB	VNG_1071G	VNG_RS04180	transcriptionfactor	VNG_RS04180		1.20379	1.16555				0.177434	-0.0951221
gene-VNG_1073G|VNG_1073G|menE	VNG_1073G	VNG_RS04185	acyl --CoAligase	VNG_RS04185		1.45324	0.358193				0.270543	0.868575
gene-VNG_1074G|VNG_1074G|menC	VNG_1074G	VNG_RS04190	chloromuconatecycloisomerase	VNG_RS04190		0.544958	-0.182375				-0.536811	1.30821
gene-VNG_1075G|VNG_1075G|menA	VNG_1075G	VNG_RS04195	1,4-dihydroxy-2-naphthoatepolyprenyl transferase	VNG_RS04195		1.20379	0.638301				-0.337139	0.946698
gene-VNG_1077G|VNG_1077G|opuD	VNG_1077G	VNG_RS04200	BCCT family transporter	VNG_RS04200		2.15068						1.39609
gene-VNG_1079G|VNG_1079G|menB	VNG_1079G	VNG_RS04205	1,4-dihydroxy-2-naphthoyl -CoAsynthase	VNG_RS04205		0.398116	0.61195				-0.398251	0.228487
gene-VNG_1081G|VNG_1081G|menD	VNG_1081G	VNG_RS04210	2-succinyl -5-enolpyruvyl -6-hydroxy-3-cyclohexene-1-carboxyl ic-acidsynthase	menD		0.630205	0.827678				-0.573337	0.419934
gene-VNG_1083G|VNG_1083G|menF	VNG_1083G	VNG_RS04215	isochorismatesynthaseMenF	VNG_RS04215		0.0459813	1.22069				-1.00699	-0.123648
gene-VNG_1084G|VNG_1084G|VNG_1084G	VNG_1084G	VNG_RS04220	sulfiteoxidase-likeoxidoreductase	VNG_RS04220		0.906753	0.358193				0.145013	0.447617
gene-VNG_1085H|VNG_1085H|VNG_1085H	VNG_1085H	VNG_RS04225	hypothetical protein	VNG_RS04225		2.68341	1.44808				0.492936	0.786467
gene-VNG_1086C|VNG_1086C|VNG_1086C	VNG_1086C	VNG_RS04230	UPF0058 family protein	VNG_RS04230		3.08425	2.19469				0.11854	0.815087
gene-VNG_1087C|VNG_1087C|VNG_1087C	VNG_1087C	VNG_RS04235	hypothetical protein	VNG_RS04235		0.16782	-0.26252				0.0438338	0.430575
gene-VNG_1088C|VNG_1088C|VNG_1088C	VNG_1088C	VNG_RS04240	hypothetical protein	VNG_RS04240		-0.143769	-1.40665				0.6925	0.614452
gene-VNG_1089G|VNG_1089G|purA	VNG_1089G	VNG_RS04245	adenyl osuccinatesynthase	VNG_RS04245		-0.28097	0.648149		-0.647919		-0.584026	-0.301023
gene-VNG_1090a|VNG_1090a|VNG_1090a	VNG_1090a	VNG_RS04255	hypothetical protein	VNG_RS04255		-0.211891	-1.17232				0.386021	0.61848
gene-VNG_1090H|VNG_1090H|trm112	VNG_1090H	VNG_RS04250	methy transferasepartnerTrm112	VNG_RS04250		0.859777	2.56765				-1.66806	0.00425698
gene-VNG_1092C|VNG_1092C|VNG_1092C	VNG_1092C	VNG_RS04260	VRR-NUC domain -containing protein	VNG_RS04260		0.565255	-0.197845				0.0493029	0.757867
gene-VNG_1093C|VNG_1093C|cbiX2	VNG_1093C	VNG_RS04265	hypothetical protein	VNG_RS04265		0.517392	0.129328				-0.635022	1.06716
gene-VNG_1094H|VNG_1094H|VNG_1094H	VNG_1094H	VNG_RS04270	outermembranelipo protein carrier protein LolA	VNG_RS04270		-1.07171	0.284192				-0.629921	-0.681915
gene-VNG_1095H|VNG_1095H|VNG_1095H	VNG_1095H	VNG_RS04275	hypothetical protein	VNG_RS04275		-0.00132442	0.00204911				-0.466422	0.507118
gene-VNG_1096H|VNG_1096H|VNG_1096H	VNG_1096H	VNG_RS04280	wingedhelix-turn-helix transcriptionalregulator	VNG_RS04280		0.114153	0.872766				-1.33714	0.622596
gene-VNG_1097G|VNG_1097G|cysS	VNG_1097G	VNG_RS04285	cysteine--tRNAligase	VNG_RS04285		0.740694	0.717274				0.13114	-0.0636502
gene-VNG_1099C|VNG_1099C|VNG_1099C	VNG_1099C	VNG_RS04290	YqcI/YcgG family protein	VNG_RS04290		0.527482	0.999739				-0.523006	0.0948185
gene-VNG_1100C|VNG_1100C|entB1	VNG_1100C	VNG_RS04295	cysteinehydrolase	VNG_RS04295		0.911213	0.817625				0.353006	-0.215348
gene-VNG_1101C|VNG_1101C|VNG_1101C	VNG_1101C	VNG_RS04300	tripartitetricarboxyl ate transporter permease	VNG_RS04300		3.35231	1.94316					0.597721
gene-VNG_1103G|VNG_1103G|rpl12	VNG_1103G	VNG_RS04305	50Sribosomal protein P1	VNG_RS04305		-0.659536	0.0967258				-0.864106	0.151914
gene-VNG_1104G|VNG_1104G|rpl10	VNG_1104G	VNG_RS04310	50Sribosomal protein L10	VNG_RS04310		-0.334325	0.309737				-0.456529	-0.143462
gene-VNG_1105G|VNG_1105G|rpl1	VNG_1105G	VNG_RS04315	50Sribosomal protein L1	VNG_RS04315		-0.171249	0.218055		-0.854127		-0.296107	-0.0491275
gene-VNG_1108G|VNG_1108G|rpl11	VNG_1108G	VNG_RS04320	50Sribosomal protein L11	VNG_RS04320		1.00103	1.74256		-0.542668		-0.531517	-0.165944
gene-VNG_1110C|VNG_1110C|VNG_1110C	VNG_1110C	VNG_RS04325	hypothetical protein	VNG_RS04325		-4.49318					-1.46642
gene-VNG_1111G|VNG_1111G|drg	VNG_1111G	VNG_RS04330	GTP-binding protein	VNG_RS04330		-1.00132	-0.346351				-0.270025	-0.340879
gene-VNG_1112H|VNG_1112H|VNG_1112H	VNG_1112H	VNG_RS04335	TIGR04206 family protein	VNG_RS04335
gene-VNG_1114G|VNG_1114G|VNG_1114G	VNG_1114G	VNG_RS04340	VOC family protein	VNG_RS04340		1.57598	1.63121		0.974896		-0.366886	0.355729
gene-VNG_1115H|VNG_1115H|VNG_1115H	VNG_1115H	VNG_RS04345	SAM-dependentmethyl transferase	VNG_RS04345		-2.85714	-3.31737				0.491543	0.0127585
gene-VNG_1117C|VNG_1117C|trm5	VNG_1117C	VNG_RS04355	classISAM-dependentmethyl transferase family protein	VNG_RS04355		0.0213957	0.918908				-0.951849	0.0984065
gene-VNG_1118G|VNG_1118G|dph5	VNG_1118G	VNG_RS04350	diphthinesynthase	VNG_RS04350		0.89484	0.860693				-0.559532	0.637748
gene-VNG_1119H|VNG_1119H|VNG_1119H	VNG_1119H	VNG_RS04365	hypothetical protein	VNG_RS04365		3.55667						0.802079
gene-VNG_1120H|VNG_1120H|VNG_1120H	VNG_1120H	VNG_RS04370	cyclase	VNG_RS04370		-0.72545	-0.641807				-0.478913	0.43934
gene-VNG_1121G|VNG_1121G|aspC3	VNG_1121G	VNG_RS04375	amino transferaseclassI/II-foldpyridoxalphosphate-dependentenzyme	VNG_RS04375		-0.884945	-1.54396	0.688			-0.254118	0.957203
gene-VNG_1123G|VNG_1123G|lrpA1	VNG_1123G	VNG_RS04380	Lrp/AsnC family transcriptional regulator	VNG_RS04380		0.903518	-0.120975				-0.175521	1.24408
gene-VNG_1125G|VNG_1125G|porB	VNG_1125G	VNG_RS04385	2-ketoglutarateferredoxinoxidoreductasesubunitbeta	VNG_RS04385		0.707018	-0.108286		-0.807932		0.327627	0.531747
gene-VNG_1128G|VNG_1128G|porA	VNG_1128G	VNG_RS04390	2-oxoacid:acceptoroxidoreductasesubunitalpha	VNG_RS04390		0.7848	-0.201282		-0.760235		0.569147	0.461005
gene-VNG_1130H|VNG_1130H|VNG_1130H	VNG_1130H	VNG_RS04395	hypothetical protein	VNG_RS04395		-0.640735	0.943155					-0.225401
gene-VNG_1131G|VNG_1131G|apbC	VNG_1131G	VNG_RS04400	Mrp/NBP35 family ATP-binding protein	VNG_RS04400		-0.0915222	-0.332479				-0.0803637	0.36539
gene-VNG_1132G|VNG_1132G|rps13	VNG_1132G	VNG_RS04410	30Sribosomal protein S13	VNG_RS04410		0.0828886	1.42531		-0.585756		-0.682914	-0.615435
gene-VNG_1133G|VNG_1133G|rps4	VNG_1133G	VNG_RS04415	30Sribosomal protein S4	VNG_RS04415		-0.388841	1.47921				-0.88146	-0.94252
gene-VNG_1134G|VNG_1134G|rps11	VNG_1134G	VNG_RS04420	30Sribosomal protein S11	VNG_RS04420		-0.277118	1.05307		-0.216418		-0.550486	-0.735635
gene-VNG_1136G|VNG_1136G|rpoD	VNG_1136G	VNG_RS04425	DNA-directedRNApolymerasesubunitD	VNG_RS04425		-0.0542733	0.853518				0.0210921	-0.884814
gene-VNG_1137G|VNG_1137G|rpl18e	VNG_1137G	VNG_RS04435	50Sribosomal protein L18e	VNG_RS04435		0.684015	0.510963				0.628735	-0.411613
gene-VNG_1138G|VNG_1138G|rpl13	VNG_1138G	VNG_RS04440	50Sribosomal protein L13	VNG_RS04440		0.387482	1.07091				-0.184022	-0.455337
gene-VNG_1139G|VNG_1139G|rps9	VNG_1139G	VNG_RS04445	30Sribosomal protein S9	VNG_RS04445		0.653179	0.860693		-0.545403		0.440468	-0.603913
gene-VNG_1140G|VNG_1140G|rpoN	VNG_1140G	VNG_RS04450	DNA-directedRNApolymerasesubunitN	VNG_RS04450		0.772167	0.501151				0.740029	-0.424943
gene-VNG_1141G|VNG_1141G|rpoK	VNG_1141G	VNG_RS04455	DNA-directedRNApolymerasesubunitK	VNG_RS04455		-0.10086	0.755083				-0.144494	-0.667379
gene-VNG_1142G|VNG_1142G|eno	VNG_1142G	VNG_RS04460	phosphopyruvatehydratase	eno		0.563889	1.00589				0.0435783	-0.441511
gene-VNG_1143G|VNG_1143G|rps2	VNG_1143G	VNG_RS04465	30Sribosomal protein S2	VNG_RS04465		0.338539	0.857953		-0.210062		0.15626	-0.631605
gene-VNG_1144H|VNG_1144H|VNG_1144H	VNG_1144H	VNG_RS04470	VOC family protein	VNG_RS04470		1.95803	1.16555				-1.14449	1.98105
gene-VNG_1145G|VNG_1145G|mvk	VNG_1145G	VNG_RS04475	mevalonatekinase	mvk		0.721835	1.16555					0.552206
gene-VNG_1148G|VNG_1148G|VNG_1148G	VNG_1148G	VNG_RS04480	hypothetical protein	VNG_RS04480		-0.519173	1.35819				-1.36689	-0.466409
gene-VNG_1149C|VNG_1149C|rnj	VNG_1149C	VNG_RS04485	ribonucleaseJ	VNG_RS04485		-0.428746	-0.561637				0.0213149	0.155646
gene-VNG_1150G|VNG_1150G|idsA1	VNG_1150G	VNG_RS04490	polyprenyl synthetase family protein	VNG_RS04490		0.0263505	-0.693032				0.513586	0.249866
gene-VNG_1151H|VNG_1151H|VNG_1151H	VNG_1151H	VNG_RS04495	hypothetical protein	VNG_RS04495
gene-VNG_1153G|VNG_1153G|gltS	VNG_1153G	VNG_RS04500	glutamate--tRNAligase	VNG_RS04500		-0.239636	-0.39388				0.100618	0.0976945
gene-VNG_1154H|VNG_1154H|VNG_1154H	VNG_1154H	VNG_RS04505	DUF456 family protein	VNG_RS04505		2.52919	0.580585					-0.447794
gene-VNG_1156G|VNG_1156G|tmcA	VNG_1156G	VNG_RS04510	tRNA(Met)cytidineacetyl transferase	VNG_RS04510		0.118257	0.358193					0.533591
gene-VNG_1157G|VNG_1157G|rpl8e	VNG_1157G	VNG_RS04515	50Sribosomal protein L7ae	VNG_RS04515		0.0047501	0.214829				-0.238821	0.0728126
gene-VNG_1158G|VNG_1158G|rps28e	VNG_1158G	VNG_RS04520	30S ribosomal protein S28e	VNG_RS04520		-0.51159	0.182163		-0.152644		-0.0435651	-0.606117
gene-VNG_1159G|VNG_1159G|rpl24e	VNG_1159G	VNG_RS04525	50Sribosomal protein L24e	VNG_RS04525		-0.0469213	1.55697				-1.32892	-0.230906
gene-VNG_1160G|VNG_1160G|ndk	VNG_1160G	VNG_RS04530	nucleoside-diphosphatekinase	ndk		0.193025	0.649189				-0.239651	-0.172443
gene-VNG_1162H|VNG_1162H|metE	VNG_1162H	VNG_RS04535	hypothetical protein	VNG_RS04535		1.28818	0.232662					-0.340879
gene-VNG_1163G|VNG_1163G|prmC	VNG_1163G	VNG_RS04540	methyl transferase domain -containing protein	VNG_RS04540		1.3068	0.11308					0.189636
gene-VNG_1164C|VNG_1164C|mscS1	VNG_1164C	VNG_RS04545	mechanosensitiveionchannel family protein	VNG_RS04545		0.430787	0.128711				0.135614	0.210531
gene-VNG_1165G|VNG_1165G|ksgA	VNG_1165G	VNG_RS04550	16SribosomalRNAmethyl transferaseA	VNG_RS04550		-0.182565	-0.38242				-0.1001	0.344025
gene-VNG_1168C|VNG_1168C|VNG_1168C	VNG_1168C	VNG_RS04555	DUF655 domain -containing protein	VNG_RS04555		-0.802016	-0.129908				-0.974569	0.346531
gene-VNG_1169C|VNG_1169C|rpoF	VNG_1169C	VNG_RS04560	RNApolymeraseRpb4 family protein	VNG_RS04560		0.236835	0.55459		-0.337339		-0.259971	-0.0137138
gene-VNG_1170a|VNG_1170a|VNG_1170a	VNG_1170a					-1.89114	-1.70321				-0.366886	0.223022
gene-VNG_1170G|VNG_1170G|rpl21e	VNG_1170G	VNG_RS04565	50Sribosomal protein L21e	VNG_RS04565		-0.0419664	0.412641				-0.444054	0.033517
gene-VNG_1172G|VNG_1172G|metB1	VNG_1172G	VNG_RS04570	cystathioninegamma-synthase	VNG_RS04570		0.468575	0.299299				0.0730974	0.140248
gene-VNG_1173a|VNG_1173a|VNG_1173a	VNG_1173a	VNG_RS04580	DUF1610 domain-containing protein	VNG_RS04580		2.56294	1.86069		0.716771		0.740029	0.00628688
gene-VNG_1173G|VNG_1173G|tef1b	VNG_1173G	VNG_RS04575	elongationfactor1-beta	VNG_RS04575		1.63611	2.20905				-0.729457	0.200582
gene-VNG_1174G|VNG_1174G|nop5	VNG_1174G	VNG_RS04590	NOP58 family protein	VNG_RS04590		-0.171249	-0.98973				0.203429	0.659121
gene-VNG_1175G|VNG_1175G|VNG_1175G	VNG_1175G	VNG_RS04585	PAS domain -containing protein	VNG_RS04585		3.00483	-1.04391				2.36452	1.72828
gene-VNG_1176G|VNG_1176G|fib	VNG_1176G	VNG_RS04595	fibrillarin-likerRNA/tRNA2'-O-methyl transferase	VNG_RS04595		-0.0268595	-0.577677				0.0670101	0.527877
gene-VNG_1178H|VNG_1178H|VNG_1178H	VNG_1178H	VNG_RS04600	hypothetical protein	VNG_RS04600
gene-VNG_1179C|VNG_1179C|VNG_1179C	VNG_1179C	VNG_RS04605	AsnC family transcriptionalregulator	VNG_RS04605		0.506822	0.358193					0.074159
gene-VNG_1180G|VNG_1180G|msrA	VNG_1180G	VNG_RS04610	peptide-methionine(S)-S-oxidereductaseMsrA	msrA		1.72822	1.29679				-0.259971	0.735472
gene-VNG_1181G|VNG_1181G|arlX	VNG_1181G	VNG_RS04615	flagellin	VNG_RS04615		-0.171249	-1.23655				0.310072	0.799299
gene-VNG_1182H|VNG_1182H|VNG_1182H	VNG_1182H	VNG_RS04620	pyridoxamine5'-phosphateoxidase family protein	VNG_RS04620		-1.59656	-0.797926				0.586319	-1.34088
gene-VNG_1183H|VNG_1183H|VNG_1183H	VNG_1183H	VNG_RS04630	Htur_1727 family rSAM-partneredcandidateRiPP	VNG_RS04630		-1.04572	0.232662				-0.0189631	-1.21535
gene-VNG_1184G|VNG_1184G|ahbC	VNG_1184G	VNG_RS04625	TIGR04347 family pseudo-SAM/SPASM protein	VNG_RS04625		-0.996571	-0.234149				-0.187996	-0.530356
gene-VNG_1185G|VNG_1185G|ahbD	VNG_1185G	VNG_RS04635	radicalSAM protein	VNG_RS04635		-4.31863	-5.70676				0.594742	0.837459
gene-VNG_1187G|VNG_1187G|VNG_1187G	VNG_1187G	VNG_RS04640	multicopperoxidase family protein	VNG_RS04640		-0.976871	-0.0633579				0.36452	-1.23396
gene-VNG_1188G|VNG_1188G|hcpD	VNG_1188G	VNG_RS04645	halocyanin domain -containing protein	VNG_RS04645		-1.21754	-0.0193699				-0.466422	-0.687681
gene-VNG_1189H|VNG_1189H|VNG_1189H	VNG_1189H	VNG_RS04650	hypothetical protein	VNG_RS04650		1.64243	1.45312				-0.079399	0.312777
gene-VNG_1190G|VNG_1190G|sod1	VNG_1190G	VNG_RS04655	superoxidedismutase	VNG_RS04655		3.53177	3.17766	0.852			0.0142037	0.383973
gene-VNG_1191G|VNG_1191G|acd3	VNG_1191G	VNG_RS04660	acyl -CoAdehydrogenase family protein	VNG_RS04660		-1.49318	-1.88282				0.91209	-0.478382
gene-VNG_1193C|VNG_1193C|VNG_1193C	VNG_1193C	VNG_RS04665	HAMP domain -containing protein	VNG_RS04665		-2.2476	-2.97076				-0.0579063	0.825131
gene-VNG_1194H|VNG_1194H|VNG_1194H	VNG_1194H	VNG_RS04670	hypothetical protein	VNG_RS04670		0.636106	0.559827				-0.407528	0.527877
gene-VNG_1196H|VNG_1196H|VNG_1196H	VNG_1196H	VNG_RS04675	nucleoside triphosphate pyrophosphohydrolase	VNG_RS04675		1.97559	0.550838					0.613318
gene-VNG_1197G|VNG_1197G|VNG_1197G	VNG_1197G	VNG_RS04680	peroxiredoxin	VNG_RS04680		0.792225	1.16555				-0.88146	0.552206
gene-VNG_1198C|VNG_1198C|VNG_1198C	VNG_1198C	VNG_RS04685	NAD(P)/FAD-dependentoxidoreductase	VNG_RS04685		0.581658	1.05007				-0.198942	-0.225401
gene-VNG_1200H|VNG_1200H|VNG_1200H	VNG_1200H	VNG_RS04690	hypothetical protein	VNG_RS04690
gene-VNG_1201G|VNG_1201G|VNG_1201G	VNG_1201G	VNG_RS04695	classIIaldolase/adducin family protein	VNG_RS04695		0.184894	0.358193				0.11854	-0.247769
gene-VNG_1202C|VNG_1202C|VNG_1202C	VNG_1202C	VNG_RS04700	HAD family hydrolase	VNG_RS04700		0.583638	3.21617					-0.443972
gene-VNG_1204G|VNG_1204G|gdhA2	VNG_1204G	VNG_RS04705	Glu/Leu/Phe/Valdehydrogenase	VNG_RS04705		0.445422	2.48748				-1.05138	-0.9466
gene-VNG_1205a|VNG_1205a|VNG_1205a	VNG_1205a	VNG_RS04415	30S ribosomal protein S4	VNG_RS04415			-0.471882					-0.925841
gene-VNG_1205C|VNG_1205C|VNG_1205C	VNG_1205C	VNG_RS04710	5'-deoxyadenosinedeaminase	VNG_RS04710			1.26508					-2.66281
gene-VNG_1207C|VNG_1207C|VNG_1207C	VNG_1207C	VNG_RS04720	helix-turn-helix domain -containing protein	VNG_RS04720
gene-VNG_1208G|VNG_1208G|hutU	VNG_1208G	VNG_RS04725	urocanatehydratase	hutU		1.75475	2.75051					-1.8072
gene-VNG_1209G|VNG_1209G|hutG	VNG_1209G	VNG_RS04730	formimidoyl glutamase	hutG		2.52919						-0.447794
gene-VNG_1211G|VNG_1211G|hutI	VNG_1211G	VNG_RS04735	imidazolonepropionase	VNG_RS04735								-1.80031
gene-VNG_1212G|VNG_1212G|hutH	VNG_1212G	VNG_RS04740	histidineammonia-lyase	hutH		2.82875	1.35819					-0.340879
gene-VNG_1213C|VNG_1213C|VNG_1213C	VNG_1213C	VNG_RS04745	ribonucleaseH-like domain -containing protein	VNG_RS04745		0.49475	-0.955307				0.626687	0.867439
gene-VNG_1214H|VNG_1214H|VNG_1214H	VNG_1214H	VNG_RS04750	hypothetical protein	VNG_RS04750		0.0466556	0.450115				-0.420128	0.0607385
gene-VNG_1215G|VNG_1215G|VNG_1215G	VNG_1215G	VNG_RS04760	GNAT family N-acetyl transferase	VNG_RS04760		0.197984	0.580585				-0.144494	-0.194037
gene-VNG_1216G|VNG_1216G|pgk	VNG_1216G	VNG_RS04765	phosphoglyceratekinase	pgk		-0.2468	0.0500706				-0.0587641	-0.194037
gene-VNG_1218C|VNG_1218C|VNG_1218C	VNG_1218C	VNG_RS04770	CBS domain -containing protein	VNG_RS04770		0.314177						0.881514
gene-VNG_1219G|VNG_1219G|udk	VNG_1219G	VNG_RS04775	uridinekinase	udk		1.15068						0.98105
gene-VNG_1220H|VNG_1220H|VNG_1220H	VNG_1220H	VNG_RS04780	hypothetical protein	VNG_RS04780		-0.376069	1.46672		0.535655		-1.23196	-0.56676
gene-VNG_1224G|VNG_1224G|orc8	VNG_1224G	VNG_RS04790	AAA family ATPase	VNG_RS04790		2.04717	1.52812				0.0619569	0.501169
gene-VNG_1226H|VNG_1226H|VNG_1226H	VNG_1226H	VNG_RS04800	hypothetical protein	VNG_RS04800
gene-VNG_1227H|VNG_1227H|VNG_1227H	VNG_1227H	VNG_RS04795	DUF2064 domain -containing protein	VNG_RS04795		1.77984	1.90839				-0.24403	0.15955
gene-VNG_1228C|VNG_1228C|VNG_1228C	VNG_1228C	VNG_RS04805	uracil-DNAglycosyl ase family protein	VNG_RS04805		-0.730677	0.0586326				-0.951849	0.206609
gene-VNG_1229H|VNG_1229H|VNG_1229H	VNG_1229H	VNG_RS04810	hypothetical protein	VNG_RS04810
gene-VNG_1230G|VNG_1230G|aroC	VNG_1230G	VNG_RS04815	chorismatesynthase	aroC		1.33309	1.33018				-0.967616	1.0146
gene-VNG_1232G|VNG_1232G|aroA	VNG_1232G	VNG_RS04820	3-phosphoshikimate1-carboxyvinyl transferase	aroA		0.111685	0.393817				-0.729457	0.491394
gene-VNG_1233G|VNG_1233G|VNG_1233G	VNG_1233G	VNG_RS04825	aminopeptidaseP family protein	VNG_RS04825		-0.976233	-0.974382				0.280004	-0.237785
gene-VNG_1234C|VNG_1234C|VNG_1234C	VNG_1234C	VNG_RS04830	PAS domain -containingsensorhistidinekinase	VNG_RS04830		-1.58629	-1.41233				0.254055	-0.383947
gene-VNG_1235C|VNG_1235C|tyrA	VNG_1235C	VNG_RS04835	prephenatedehydrogenase/arogenatedehydrogenase family protein	VNG_RS04835
gene-VNG_1236C|VNG_1236C|VNG_1236C	VNG_1236C	VNG_RS04840	classISAM-dependentmethyl transferase	VNG_RS04840		0.724915	1.09516				-0.729457	0.403283
gene-VNG_1237C|VNG_1237C|VNG_1237C	VNG_1237C	VNG_RS04845	Lrp/AsnC family transcriptionalregulator	VNG_RS04845		1.15068	0.0586326					0.28061
gene-VNG_1238C|VNG_1238C|VNG_1238C	VNG_1238C	VNG_RS04850	hypothetical protein			4.07668	1.6436					-0.378353
gene-VNG_1239H|VNG_1239H|VNG_1239H	VNG_1239H
gene-VNG_1240G|VNG_1240G|cat3	VNG_1240G	VNG_RS04855	aminoacidpermease	VNG_RS04855		1.86437	2.60612				-0.466422	-0.231254
gene-VNG_1241G|VNG_1241G|surE	VNG_1241G	VNG_RS04860	5'/3'-nucleotidaseSurE	surE		1.20547	1.98268				-0.1918	-0.541343
gene-VNG_1244C|VNG_1244C|aroQ	VNG_1244C	VNG_RS04870	chorismatemutase	VNG_RS04870		0.172705	0.528118				-0.844934	0.533591
gene-VNG_1245C|VNG_1245C|aroK	VNG_1245C	VNG_RS04875	shikimatekinase	VNG_RS04875		-0.0192463	0.232662				-0.729457	0.521618
gene-VNG_1246a|VNG_1246a|VNG_1246a	VNG_1246a
gene-VNG_1246H|VNG_1246H|VNG_1246H	VNG_1246H	VNG_RS04880	hypothetical protein	VNG_RS04880		1.63611	0.284192					0.218549
gene-VNG_1247G|VNG_1247G|VNG_1247G	VNG_1247G	VNG_RS04890	ABC transporter ATP-binding protein	VNG_RS04890		-0.533819	0.428582					-0.925841
gene-VNG_1249C|VNG_1249C|VNG_1249C	VNG_1249C	VNG_RS04895	ABC transporter	VNG_RS04895		-2.05577	-0.346351				-0.270025	-1.39533
gene-VNG_1250H|VNG_1250H|VNG_1250H	VNG_1250H	VNG_RS04900	hypothetical protein	VNG_RS04900		-1.87752	-1.4052				0.237593	-0.665841
gene-VNG_1251G|VNG_1251G|lhr	VNG_1251G	VNG_RS04905	DEAD/DEAHboxhelicase	VNG_RS04905		0.965289	0.982684				-0.325066	0.351742
gene-VNG_1252G|VNG_1252G|rpe	VNG_1252G	VNG_RS04910	metallophosphoesterase	VNG_RS04910		0.955862	0.358193				-0.585067	1.22681
gene-VNG_1253C|VNG_1253C|rpap1	VNG_1253C	VNG_RS04915	hypothetical protein	VNG_RS04915		0.562769	0.439113				-1.05876	1.22649
gene-VNG_1255C|VNG_1255C|rpa1	VNG_1255C	VNG_RS04920	Single-strandedDNAbinding protein	VNG_RS04920		0.63283	0.373143				-0.536811	0.840568
gene-VNG_1256G|VNG_1256G|arfC	VNG_1256G	VNG_RS04925	2,5-diamino-6-(ribosyl amino)-4(3H)-pyrimidinone5'-phosphatereductase	VNG_RS04925
gene-VNG_1257H|VNG_1257H|VNG_1257H	VNG_1257H	VNG_RS04930	hypothetical protein	VNG_RS04930		1.1895	0.65481		1.26063		-0.0803637	0.659121
gene-VNG_1259G|VNG_1259G|trxB2	VNG_1259G	VNG_RS04935	FAD-dependentoxidoreductase	VNG_RS04935		2.26876	0.224926		-1.50144		0.855506	1.2324
gene-VNG_1260C|VNG_1260C|VNG_1260C	VNG_1260C	VNG_RS04940	DUF357 domain -containing protein	VNG_RS04940
gene-VNG_1261H|VNG_1261H|VNG_1261H	VNG_1261H	VNG_RS04945	hypothetical protein	VNG_RS04945
gene-VNG_1262G|VNG_1262G|tif2b	VNG_1262G	VNG_RS04950	translationinitiationfactorIF-2subunitbeta	VNG_RS04950		0.27621	0.680121				-0.796571	0.436729
gene-VNG_1263C|VNG_1263C|VNG_1263C	VNG_1263C	VNG_RS04955	UPF0058 family protein	VNG_RS04955		-0.742665	0.060649				-0.676017	-0.0832273
gene-VNG_1264C|VNG_1264C|VNG_1264C	VNG_1264C	VNG_RS04960	DUF555 domain -containing protein	VNG_RS04960		-0.497478	-0.871289				-0.449349	0.86723
gene-VNG_1266G|VNG_1266G|VNG_1266G	VNG_1266G	VNG_RS04965	DNA-3-methyl adenineglycosyl ase2 family protein	VNG_RS04965		2.3206						0.507118
gene-VNG_1268H|VNG_1268H|VNG_1268H	VNG_1268H	VNG_RS04970	hypothetical protein	VNG_RS04970		0.650413	1.69318				-1.11133	0.112633
gene-VNG_1270H|VNG_1270H|VNG_1270H	VNG_1270H	VNG_RS13335	hypothetical protein	VNG_RS13335
gene-VNG_1271H|VNG_1271H|VNG_1271H	VNG_1271H	VNG_RS04975	hypothetical protein	VNG_RS04975
gene-VNG_1272C|VNG_1272C|nnrDE	VNG_1272C	VNG_RS04980	bifunctionalADP-dependentNAD(P)H-hydratedehydratase/NAD(P)H-hydrateepimerase	VNG_RS04980		-0.948857	-0.824671				-0.507064	0.426948
gene-VNG_1273G|VNG_1273G|moaC	VNG_1273G	VNG_RS04985	cyclicpyranopterinmonophosphatesynthaseMoaC	moaC		-0.816154	-1.36879				0.0142037	0.5825
gene-VNG_1275G|VNG_1275G|hflX2	VNG_1275G	VNG_RS04990	GTPaseHflX	hflX		-0.472374	-0.659804				-0.375378	0.606878
gene-VNG_1276C|VNG_1276C|sdo1	VNG_1276C	VNG_RS04995	ribosomeassemblyfactorSBDS	VNG_RS04995		0.679373	-0.313184				0.351033	0.685594
gene-VNG_1279H|VNG_1279H|rnp2	VNG_1279H	VNG_RS05000	ribonucleaseP	VNG_RS05000		-1.30875					-2.60393	0.659121
gene-VNG_1280C|VNG_1280C|VNG_1280C	VNG_1280C	VNG_RS05005	classISAM-dependentmethyl transferase	VNG_RS05005		-0.614856	-1.64181		-0.718806		1.01597	0.0550502
gene-VNG_1281H|VNG_1281H|rnp3	VNG_1281H	VNG_RS05010	ribonuclease P	VNG_RS05010		0.480827	0.265084					0.211663
gene-VNG_1282G|VNG_1282G|trkA5	VNG_1282G	VNG_RS05015	TrkA family potassiumuptake protein	VNG_RS05015		-1.43428					-0.729457	0.98105
gene-VNG_1283H|VNG_1283H|VNG_1283H	VNG_1283H	VNG_RS05020	hypothetical protein	VNG_RS05020
gene-VNG_1284G|VNG_1284G|trkH1	VNG_1284G	VNG_RS05025	TrkH family potassiumuptake protein	VNG_RS05025		0.413713	1.26508					-0.492882
gene-VNG_1285G|VNG_1285G|VNG_1285G	VNG_1285G	VNG_RS05030	wingedhelix-turn-helix transcriptionalregulator	VNG_RS05030		1.89914	1.58701				-0.0513846	0.407583
gene-VNG_1287C|VNG_1287C|VNG_1287C	VNG_1287C	VNG_RS05035	RNA-binding protein	VNG_RS05035		1.65657	1.23266				0.11854	0.349437
gene-VNG_1289H|VNG_1289H|VNG_1289H	VNG_1289H	VNG_RS05040	hypothetical protein	VNG_RS05040		1.18815	2.00589				-0.485531	-0.288137
gene-VNG_1291H|VNG_1291H|VNG_1291H	VNG_1291H	VNG_RS05045	hypothetical protein	VNG_RS05045		0.687707	1.77852				-0.729457	-0.317292
gene-VNG_1292H|VNG_1292H|VNG_1292H	VNG_1292H					0.761636	-0.0974866				0.981037	-0.0778441
gene-VNG_1294G|VNG_1294G|mtfK	VNG_1294G	VNG_RS05050	peptidyl prolyl isomerase	VNG_RS05050		0.931112	1.13349				-0.183594	0.0252893
gene-VNG_1295H|VNG_1295H|VNG_1295H	VNG_1295H	VNG_RS05055	hypothetical protein	VNG_RS05055
gene-VNG_1296C|VNG_1296C|VNG_1296C	VNG_1296C	VNG_RS05060	classIVadenyl atecyclase	cyaB		0.6829	-0.319879				0.962421	0.0844273
gene-VNG_1297C|VNG_1297C|mat	VNG_1297C	VNG_RS05065	methionineadenosyl transferase	VNG_RS05065		0.779169	2.71304				-0.653508	-1.23629
gene-VNG_1299C|VNG_1299C|thiI	VNG_1299C	VNG_RS05070	tRNA4-thiouridine(8)synthaseThiI	VNG_RS05070		0.998676	2.44566				-1.46642	0.0635118
gene-VNG_1300H|VNG_1300H|VNG_1300H	VNG_1300H	VNG_RS05075	hypothetical protein	VNG_RS05075		-0.171249	0.680121					0.337193
gene-VNG_1301G|VNG_1301G|cysK2	VNG_1301G	VNG_RS05080	PLP-dependentcysteinesynthase family protein	VNG_RS05080		2.14533	0.982684				-0.314419	1.52113
gene-VNG_1302H|VNG_1302H|trxA5	VNG_1302H	VNG_RS05085	thioredoxin family protein	VNG_RS05085		0.413713	-2.81173				1.21808	2.05144
gene-VNG_1303C|VNG_1303C|VNG_1303C	VNG_1303C	VNG_RS05090	thioredoxin domain -containing protein	VNG_RS05090		-0.419177	-1.12723				-0.585067	1.33719
gene-VNG_1305G|VNG_1305G|purD	VNG_1305G	VNG_RS05095	phosphoribosyl amine--glycineligase	purD		-2.40755	-1.50854				-1.30924	0.454302
gene-VNG_1306G|VNG_1306G|sdhA	VNG_1306G	VNG_RS05100	FAD-binding protein	VNG_RS05100		-0.156894	-0.561637				0.340933	0.10788
gene-VNG_1308G|VNG_1308G|sdhB	VNG_1308G	VNG_RS05105	succinatedehydrogenase/fumaratereductaseiron-sulfursubunit	VNG_RS05105		0.633934	0.330607				0.330045	0.0173526
gene-VNG_1309G|VNG_1309G|sdhD	VNG_1309G	VNG_RS05110	succinatedehydrogenasehydrophobicmembraneanchorsubunit	VNG_RS05110		1.12741	0.373143				0.796612	0.00172316
gene-VNG_1310G|VNG_1310G|sdhC	VNG_1310G	VNG_RS05115	succinatedehydrogenase,cytochromeb556subunit	sdhC		0.595551	1.70692				-1.21058	0.143283
gene-VNG_1311G|VNG_1311G|VNG_1311G	VNG_1311G	VNG_RS05120	DNA-3-methyl adenineglycosyl ase2 family protein	VNG_RS05120		0.975592						1.80596
gene-VNG_1313G|VNG_1313G|hbd2	VNG_1313G	VNG_RS05125	enoyl -CoAhydratase/isomerase family protein	VNG_RS05125		-0.0394242	-0.00823463		0.941707		0.257123	-0.244243
gene-VNG_1314H|VNG_1314H|VNG_1314H	VNG_1314H	VNG_RS05135	hypothetical protein	VNG_RS05135		-2.10086	-1.51056		3.1477		-0.0741047	-0.472123
gene-VNG_1315H|VNG_1315H|VNG_1315H	VNG_1315H	VNG_RS05140	hypothetical protein	VNG_RS05140		-2.51364	-2.37877				-0.164958	0.074159
gene-VNG_1317H|VNG_1317H|VNG_1317H	VNG_1317H	VNG_RS13340	hypothetical protein	VNG_RS13340
gene-VNG_1318H|VNG_1318H|VNG_1318H	VNG_1318H	VNG_RS05145	hypothetical protein	VNG_RS05145		2.3206	0.0462489				0.440468	1.87796
gene-VNG_1319H|VNG_1319H|VNG_1319H	VNG_1319H	VNG_RS05150	hypothetical protein	VNG_RS05150		0.0802893	-0.167876				-0.366886	0.659121
gene-VNG_1320G|VNG_1320G|VNG_1320G	VNG_1320G	VNG_RS05155	hypothetical protein	VNG_RS05155		-0.586287	-0.217667				-0.0695319	-0.255018
gene-VNG_1323C|VNG_1323C|VNG_1323C	VNG_1323C	VNG_RS05160	right-handedparallelbeta-helixrepeat-containing protein	VNG_RS05160		-1.30281	-0.841339				-0.00578773	-0.411613
gene-VNG_1324C|VNG_1324C|VNG_1324C	VNG_1324C	VNG_RS05165	GtrA family protein	VNG_RS05165		0.207262	-0.52633				0.381575	0.396087
gene-VNG_1325C|VNG_1325C|thyX	VNG_1325C	VNG_RS05175	FAD-dependentthymidyl atesynthase	thyX		0.211608	0.877567				-0.910029	0.288139
gene-VNG_1326H|VNG_1326H|VNG_1326H	VNG_1326H	VNG_RS05180	cupin domain -containing protein	VNG_RS05180		-2.2691	-2.55254				0.479358	-0.151845
gene-VNG_1327G|VNG_1327G|VNG_1327G	VNG_1327G	VNG_RS05185	MBLfoldmetallo-hydrolase	VNG_RS05185		0.269323	-0.275025				0.711116	-0.122698
gene-VNG_1329H|VNG_1329H|VNG_1329H	VNG_1329H	VNG_RS05190	hypothetical protein	VNG_RS05190		1.24379						-0.148233
gene-VNG_1330H|VNG_1330H|VNG_1330H	VNG_1330H	VNG_RS05195	hypothetical protein	VNG_RS05195		1.91621	-0.79381					0.576659
gene-VNG_1332G|VNG_1332G|sod2	VNG_1332G	VNG_RS05200	superoxidedismutase	VNG_RS05200		-1.13335	-1.30077	0.988			0.24704	-0.0355524
gene-VNG_1335G|VNG_1335G|phr2	VNG_1335G	VNG_RS05205	deoxyribodipyrimidinephoto-lyase	VNG_RS05205		1.52919	0.323428				1.0779	0.171934
gene-VNG_1336C|VNG_1336C|VNG_1336C	VNG_1336C	VNG_RS05210	hotdogfoldthioesterase	VNG_RS05210		0.413713	0.47367				-0.366886	0.350999
gene-VNG_1337C|VNG_1337C|VNG_1337C	VNG_1337C	VNG_RS05215	sulfatase-likehydrolase/ transferase	VNG_RS05215		-0.0871852	-0.259337				0.0190047	0.197217
gene-VNG_1339C|VNG_1339C|acs3	VNG_1339C	VNG_RS05220	long-chainfattyacid--CoAligase	VNG_RS05220		-0.734943	-0.820264				-0.074785	0.204175
gene-VNG_1340C|VNG_1340C|VNG_1340C	VNG_1340C	VNG_RS05225	N-acyl homoserinelactonase family protein	VNG_RS05225		-2.00775	-1.13931				-0.203388	-0.620986
gene-VNG_1341G|VNG_1341G|VNG_1341G	VNG_1341G	VNG_RS05230	SDR family oxidoreductase	VNG_RS05230		0.207262	-0.864199					-0.225401
gene-VNG_1342G|VNG_1342G|VNG_1342G	VNG_1342G	VNG_RS05235	TIGR04024 family l LMclassF420-dependentoxidoreductase	VNG_RS05235		0.128311	-1.4008				0.614498	0.958682
gene-VNG_1343C|VNG_1343C|mptE	VNG_1343C	VNG_RS05240	DUF115 domain -containing protein	VNG_RS05240		0.243788	-0.3523				0.11854	0.521618
gene-VNG_1344G|VNG_1344G|folP	VNG_1344G	VNG_RS05245	dihydropteroatesynthase	VNG_RS05245		0.782947	0.943155					0.0283553
gene-VNG_1345H|VNG_1345H|VNG_1345H	VNG_1345H	VNG_RS05250	hypothetical protein	VNG_RS05250		0.636106	1.20619				-1.91003	1.38401
gene-VNG_1347C|VNG_1347C|VNG_1347C	VNG_1347C	VNG_RS05255	RNAmethyl transferase	VNG_RS05255		1.25502	0.897352				-0.466422	0.868156
gene-VNG_1349C|VNG_1349C|maoC3	VNG_1349C	VNG_RS05260	MaoC family dehydratase	VNG_RS05260		3.43361	0.402587					1.80455
gene-VNG_1350C|VNG_1350C|VNG_1350C	VNG_1350C	VNG_RS05265	EamA family transporter	VNG_RS05265		3.90675	2.09516					2.58512
gene-VNG_1351G|VNG_1351G|VNG_1351G	VNG_1351G	VNG_RS05270	Lrp/AsnC family transcriptionalregulator	VNG_RS05270		-0.0192463	-0.0137759				-0.854987	0.893587
gene-VNG_1352G|VNG_1352G|gatE	VNG_1352G	VNG_RS05275	Glu-tRNA(Gln)amido transferasesubunitGatE	gatE		-0.586287	-0.49206				-0.144494	0.0943369
gene-VNG_1353C|VNG_1353C|VNG_1353C	VNG_1353C	VNG_RS05280	PH domain -containing protein	VNG_RS05280		-0.948857	-0.471882				-0.729457	0.296551
gene-VNG_1355H|VNG_1355H|VNG_1355H	VNG_1355H	VNG_RS05285	PH domain -containing protein	VNG_RS05285		-0.808679	0.47367				-1.36689	0.128607
gene-VNG_1356G|VNG_1356G|fumC	VNG_1356G	VNG_RS05290	classIIfumaratehydratase	VNG_RS05290		-0.833174	0.47367		-0.447721		-0.767424	-0.49535
gene-VNG_1357C|VNG_1357C|bolA	VNG_1357C	VNG_RS05295	BolA family transcriptionalregulator	VNG_RS05295		0.998676	-0.0568446					0.829046
gene-VNG_1359G|VNG_1359G|fen1	VNG_1359G	VNG_RS05300	flap endonuclease -1	fen		0.78693	1.54582				-1.10385	0.389032
gene-VNG_1360H|VNG_1360H|VNG_1360H	VNG_1360H	VNG_RS05305	GNAT family N-acetyl transferase	VNG_RS05305
gene-VNG_1362H|VNG_1362H|VNG_1362H	VNG_1362H	VNG_RS05310	DUF3054 domain -containing protein	VNG_RS05310		1.82875	1.52812					0.489196
gene-VNG_1364G|VNG_1364G|VNG_1364G	VNG_1364G	VNG_RS05315	ornithinecyclodeaminase family protein	VNG_RS05315		2.69548	1.55697				-0.772525	1.95511
gene-VNG_1365C|VNG_1365C|VNG_1365C	VNG_1365C	VNG_RS05320	hypothetical protein	VNG_RS05320
gene-VNG_1366H|VNG_1366H|gar1	VNG_1366H	VNG_RS05325	H/ACARNA- protein complex protein Gar1	VNG_RS05325		1.68673						2.19517
gene-VNG_1367G|VNG_1367G|srp19	VNG_1367G	VNG_RS05330	signalrecognitionparticle	VNG_RS05330		0.735641						1.98105
gene-VNG_1369G|VNG_1369G|btuF	VNG_1369G	VNG_RS05335	ABC transporter substrate-binding protein	VNG_RS05335		-0.438036	0.0676028				-0.201827	-0.259742
gene-VNG_1370G|VNG_1370G|btuC	VNG_1370G	VNG_RS05340	vitaminB12ABC transporter permeaseBtuC	btuC		-1.54976	-0.0974866				-0.844934	-0.563271
gene-VNG_1371G|VNG_1371G|btuD	VNG_1371G	VNG_RS05345	hemeABC transporter ATP-binding protein	VNG_RS05345		-1.90822	-0.361699				-0.659067	-0.843379
gene-VNG_1372C|VNG_1372C|VNG_1372C	VNG_1372C	VNG_RS05350	hypothetical protein	VNG_RS05350		4.88403	1.76758					1.30501
gene-VNG_1374G|VNG_1374G|kinA1	VNG_1374G	VNG_RS05355	PAS domain S-box protein	VNG_RS05355		0.405676	-0.440173				0.270543	0.619375
gene-VNG_1375C|VNG_1375C|VNG_1375C	VNG_1375C	VNG_RS05360	sensorhistidinekinase	VNG_RS05360		0.771265	-0.533283				0.855506	0.493112
gene-VNG_1376H|VNG_1376H|VNG_1376H	VNG_1376H	VNG_RS14210	hypothetical protein	VNG_RS14210		-1.18832	0.245718				-0.646994	-0.742977
gene-VNG_1377G|VNG_1377G|VNG_1377G	VNG_1377G	VNG_RS05365	Lrp/AsnC family transcriptionalregulator	VNG_RS05365		1.10886	2.35819					-0.253416
gene-VNG_1379G|VNG_1379G|suhB	VNG_1379G	VNG_RS05370	inositolmonophosphatase	VNG_RS05370		0.0402547	1.52812				-0.585067	-0.858727
gene-VNG_1380H|VNG_1380H|VNG_1380H	VNG_1380H	VNG_RS05380	hypothetical protein	VNG_RS05380		-4.6625	-4.63523				0.411125	-0.394318
gene-VNG_1381H|VNG_1381H|VNG_1381H	VNG_1381H	VNG_RS05385	hypothetical protein	VNG_RS05385		-1.05231	-1.53587				0.569752	-0.0421164
gene-VNG_1382H|VNG_1382H|VNG_1382H	VNG_1382H	VNG_RS05390	hypothetical protein	VNG_RS05390		0.998676						1.50712
gene-VNG_1383G|VNG_1383G|rad3a	VNG_1383G	VNG_RS05395	ATP-dependentDNAhelicase	VNG_RS05395		1.70322	0.894246					0.260572
gene-VNG_1384H|VNG_1384H|VNG_1384H	VNG_1384H	VNG_RS05400	hypothetical protein	VNG_RS05400
gene-VNG_1385G|VNG_1385G|yvoF	VNG_1385G	VNG_RS05405	acyl transferase	VNG_RS05405		1.01318	1.52812				-1.60393	1.13305
gene-VNG_1387H|VNG_1387H|VNG_1387H	VNG_1387H	VNG_RS05410	hypothetical protein	VNG_RS05410		-0.171249	-0.542271					-0.0778441
gene-VNG_1388H|VNG_1388H|mscS2	VNG_1388H	VNG_RS05415	mechanosensitiveionchannel	VNG_RS05415		0.091785	-1.4898				0.703503	0.922156
gene-VNG_1389C|VNG_1389C|dacZ	VNG_1389C	VNG_RS05420	diadenyl atecyclase	VNG_RS05420		0.00507335	-0.459604		0.869003		-0.0879105	0.596657
gene-VNG_1390a|VNG_1390a|coaD	VNG_1390a	VNG_RS05435	phosphopantetheine adenylyltransferase	VNG_RS05435		0.461019	0.312389				-0.466422	0.659121
gene-VNG_1390H|VNG_1390H|VNG_1390H	VNG_1390H	VNG_RS05430	transcriptioninitiationfactorIIB family protein	VNG_RS05430		-0.29678						1.53359
gene-VNG_1394H|VNG_1394H|VNG_1394H	VNG_1394H	VNG_RS05440	wingedhelix-turn-helix transcriptionalregulator	VNG_RS05440		-0.508284	1.05863				-1.72946	0.206609
gene-VNG_1395G|VNG_1395G|htr9	VNG_1395G	VNG_RS05445	methyl -acceptingchemotaxis protein	VNG_RS05445		3.47261	-0.139307					0.215515
gene-VNG_1397C|VNG_1397C|gshA	VNG_1397C	VNG_RS05450	glutamate--cysteineligase	VNG_RS05450		0.565716	0.75051					0.173695
gene-VNG_1398C|VNG_1398C|VNG_1398C	VNG_1398C	VNG_RS05455	GNAT family N-acetyl transferase	VNG_RS05455		-0.171249						0.98105
gene-VNG_1401C|VNG_1401C|VNG_1401C	VNG_1401C	VNG_RS05465	UPF0179 family protein	VNG_RS05465		0.114153	-0.319879				0.177434	0.300668
gene-VNG_1402H|VNG_1402H|VNG_1402H	VNG_1402H	VNG_RS05460	DUF309 domain -containing protein	VNG_RS05460		2.41371	1.21617					-0.0289345
gene-VNG_1403H|VNG_1403H|VNG_1403H	VNG_1403H	VNG_RS05470	hypothetical protein	VNG_RS05470		2.73564	0.943155					-0.603913
gene-VNG_1404a|VNG_1404a|VNG_1404a	VNG_1404a					-1.26993	-1.71581				0.258571	0.231373
gene-VNG_1404G|VNG_1404G|msrB	VNG_1404G	VNG_RS05480	peptide-methionine(R)-S-oxidereductaseMsrB	msrB		1.77065	1.92298				-0.807459	0.699199
gene-VNG_1405C|VNG_1405C|VNG_1405C	VNG_1405C	VNG_RS05475	helix-turn-helix transcriptionalregulator	VNG_RS05475		1.15068	1.08066					-0.0633445
gene-VNG_1406G|VNG_1406G|rad25c	VNG_1406G	VNG_RS05485	DEAD/DEAH box helicase family protein	VNG_RS05485		2.16755	0.635033				0.468483	1.10811
gene-VNG_1407C|VNG_1407C|VNG_1407C	VNG_1407C	VNG_RS05490	acyl -CoAthioesterase	VNG_RS05490		2.19798	3.00205					0.969462
gene-VNG_1408G|VNG_1408G|VNG_1408G	VNG_1408G	VNG_RS05495	5'-nucleotidaseC-terminal domain -containing protein	VNG_RS05495		-2.21841	-0.78188	-0.468			-0.361007	-1.03145
gene-VNG_1409C|VNG_1409C|VNG_1409C	VNG_1409C	VNG_RS05500	DUF63 family protein	VNG_RS05500		-1.35567	0.528118				-1.20339	-0.636334
gene-VNG_1410H|VNG_1410H|VNG_1410H	VNG_1410H	VNG_RS05505	YcaO-like family protein	VNG_RS05505		2.10886	0.855693				0.135614	1.16162
gene-VNG_1412H|VNG_1412H|VNG_1412H	VNG_1412H	VNG_RS05510	hypothetical protein	VNG_RS05510		0.866148	0.885686		-0.397448		-0.138445	0.162976
gene-VNG_1413H|VNG_1413H|VNG_1413H	VNG_1413H	VNG_RS05515	hypothetical protein	VNG_RS05515		-0.25002	-0.0838805				0.316308	-0.438378
gene-VNG_1414G|VNG_1414G|glyA	VNG_1414G	VNG_RS05520	serinehydroxymethyl transferase	VNG_RS05520		0.243788	0.722556				-0.0727582	-0.36194
gene-VNG_1416G|VNG_1416G|folD	VNG_1416G	VNG_RS05525	bifunctionalmethyl enetetrahydrofolatedehydrogenase/methenyl tetrahydrofolatecyclohydrolase	VNG_RS05525		1.37418	0.867207				0.346492	0.204556
gene-VNG_1417H|VNG_1417H|VNG_1417H	VNG_1417H	VNG_RS05530	hypothetical protein	VNG_RS05530		1.24379						1.65912
gene-VNG_1418C|VNG_1418C|VNG_1418C	VNG_1418C	VNG_RS05535	hypothetical protein	VNG_RS05535		0.726871	-0.15638				-0.281998	1.20932
gene-VNG_1420H|VNG_1420H|VNG_1420H	VNG_1420H	VNG_RS05540	hypothetical protein	VNG_RS05540		-0.00619017	0.0462489				-1.01896	1.01059
gene-VNG_1422H|VNG_1422H|VNG_1422H	VNG_1422H	VNG_RS05545	DUF1028 domain -containing protein	VNG_RS05545		0.617246	-1.15638				1.30296	0.514732
gene-VNG_1423H|VNG_1423H|VNG_1423H	VNG_1423H	VNG_RS14215	hypothetical protein	VNG_RS14215
gene-VNG_1425H|VNG_1425H|VNG_1425H	VNG_1425H	VNG_RS05550	amphi-Trp domain -containing protein	VNG_RS05550		2.38772	2.05863				-0.629921	1.00308
gene-VNG_1426H|VNG_1426H|VNG_1426H	VNG_1426H	VNG_RS05555	PadR family transcriptionalregulator	VNG_RS05555		0.0675374	-0.239709				0.0190047	0.332311
gene-VNG_1427H|VNG_1427H|VNG_1427H	VNG_1427H	VNG_RS05560	hypothetical protein	VNG_RS05560		-0.640735	0.0951585					0.0376331
gene-VNG_1428G|VNG_1428G|VNG_1428G	VNG_1428G	VNG_RS05565	AI-2E family transporter	VNG_RS05565		-0.908215	-0.279237				-0.24403	-0.340879
gene-VNG_1429C|VNG_1429C|cofD	VNG_1429C	VNG_RS05570	2-phospho-L-lactate transferase	VNG_RS05570		0.150679	1.44566				-1.46642	0.215515
gene-VNG_1431C|VNG_1431C|dpd	VNG_1431C	VNG_RS05575	tRNA-dihydrouridinesynthase	VNG_RS05575		0.207262						0.774599
gene-VNG_1432G|VNG_1432G|dhs	VNG_1432G	VNG_RS05580	deoxyhypusinesynthase	VNG_RS05580		1.29154	2.00205				-0.844934	0.178496
gene-VNG_1433G|VNG_1433G|rps17e	VNG_1433G	VNG_RS05585	30Sribosomal protein S17e	VNG_RS05585		-0.264359	1.58059					-1.24134
gene-VNG_1435G|VNG_1435G|asd	VNG_1435G	VNG_RS05590	aspartate-semialdehydedehydrogenase	asd		-0.171249	0.146689				0.0670101	-0.340879
gene-VNG_1437G|VNG_1437G|serA2	VNG_1437G	VNG_RS05595	D-2-hydroxyaciddehydrogenase	VNG_RS05595		0.328322	0.513471				-0.543043	0.401964
gene-VNG_1438a|VNG_1438a|VNG_1438a	VNG_1438a					-2.332	-1.64181				-0.805008	0.158882
gene-VNG_1438H|VNG_1438H|VNG_1438H	VNG_1438H	VNG_RS05600	hypothetical protein	VNG_RS05600		-0.10086	-0.0568446				-0.88146	0.881514
gene-VNG_1440H|VNG_1440H|VNG_1440H	VNG_1440H	VNG_RS05605	hypothetical protein	VNG_RS05605		0.966254	-0.0568446					0.948628
gene-VNG_1442G|VNG_1442G|htrXII	VNG_1442G	VNG_RS05610	PAS domain -containing protein	VNG_RS05610		0.793985	-0.149411	0.49			0.345832	0.641634
gene-VNG_1444G|VNG_1444G|hisD	VNG_1444G	VNG_RS05615	histidinoldehydrogenase	hisD		-0.223717	-0.400799				-0.492417	0.713569
gene-VNG_1446H|VNG_1446H|VNG_1446H	VNG_1446H	VNG_RS05620	dodecin domain -containing protein	VNG_RS05620		-2.43428	-2.01378				0.145013	-0.521451
gene-VNG_1447H|VNG_1447H|VNG_1447H	VNG_1447H	VNG_RS05625	metal-dependenthydrolase	VNG_RS05625		1.15068	0.77323					1.15097
gene-VNG_1448H|VNG_1448H|VNG_1448H	VNG_1448H	VNG_RS05630	hypothetical protein	VNG_RS05630								-0.492882
gene-VNG_1450G|VNG_1450G|VNG_1450G	VNG_1450G	VNG_RS05635	5'-nucleotidaseC-terminal domain -containing protein	VNG_RS05635		3.0382	2.52812					0.69865
gene-VNG_1451C|VNG_1451C|trmB	VNG_1451C	VNG_RS05640	TrmB family transcriptionalregulator	VNG_RS05640		-0.598064	0.860693				-0.917084	-0.497604
gene-VNG_1452G|VNG_1452G|VNG_1452G	VNG_1452G	VNG_RS05645	translationinitiationfactoreIF-2B	VNG_RS05645		-0.421228	0.165548				-0.603926	0.0612199
gene-VNG_1453H|VNG_1453H|VNG_1453H	VNG_1453H	VNG_RS05650	hypothetical protein	VNG_RS05650		0.966254	2.94316				-2.46642	0.533591
gene-VNG_1454C|VNG_1454C|rtcB	VNG_1454C	VNG_RS05655	RtcB family protein	VNG_RS05655		0.381292	0.165548				-0.729457	0.98927
gene-VNG_1455H|VNG_1455H|VNG_1455H	VNG_1455H	VNG_RS05660	DoxX family protein	VNG_RS05660		2.37307	1.52812					0.61848
gene-VNG_1456H|VNG_1456H|VNG_1456H	VNG_1456H	VNG_RS05665	archease	VNG_RS05665
gene-VNG_1457C|VNG_1457C|VNG_1457C	VNG_1457C	VNG_RS05670	GNAT family N-acetyl transferase	VNG_RS05670		-1.36651	-1.16905				0.166435	-0.319817
gene-VNG_1458G|VNG_1458G|crtB1	VNG_1458G	VNG_RS05675	phytoene/squalenesynthase family protein	VNG_RS05675		-3.6631	-3.69492				-0.583236	0.659121
gene-VNG_1459H|VNG_1459H|VNG_1459H	VNG_1459H	VNG_RS05680	hypothetical protein	VNG_RS05680		-3.17125	-3.60528				0.140908	0.337193
gene-VNG_1461H|VNG_1461H|VNG_1461H	VNG_1461H	VNG_RS05685	hypothetical protein	VNG_RS05685
gene-VNG_1462G|VNG_1462G|bac	VNG_1462G	VNG_RS05690	AAA family ATPase	VNG_RS05690		-1.89561	-1.8642				-0.585067	0.597721
gene-VNG_1463G|VNG_1463G|blp	VNG_1463G	VNG_RS05695	SRPBCC family protein	VNG_RS05695		-0.800881	-1.152				-0.53242	0.92761
gene-VNG_1464G|VNG_1464G|bat	VNG_1464G	VNG_RS05700	helix-turn-helix domain -containing protein	VNG_RS05700		-2.76434	-2.31166				-0.490944	0.0823329
gene-VNG_1465G|VNG_1465G|brp	VNG_1465G	VNG_RS05705	beta-carotene15,15'-dioxygenase,Brp/Blh family	VNG_RS05705		-2.28087	-3.27924				-0.694691	1.73712
gene-VNG_1466a|VNG_1466a|brb	VNG_1466a						0.817625					-1.80031
gene-VNG_1466H|VNG_1466H|brz	VNG_1466H	VNG_RS05710	transcriptionalregulatorBrz	brz
gene-VNG_1467G|VNG_1467G|bop	VNG_1467G	VNG_RS05715	bacteriorhodopsin	VNG_RS05715		-3.9138	-5.1754		1.0579		-0.344522	1.65019
gene-VNG_1468H|VNG_1468H|bap	VNG_1468H	VNG_RS05720	hypothetical protein	VNG_RS05720		-5.00919					-0.471475
gene-VNG_1470G|VNG_1470G|priS	VNG_1470G	VNG_RS05725	DNAprimasesmallsubunitPriS	priS		-0.559815	-0.45418				-0.144494	0.0829292
gene-VNG_1471C|VNG_1471C|ginS	VNG_1471C	VNG_RS05730	hypothetical protein	VNG_RS05730		0.615347	0.376115				-0.144494	0.427796
gene-VNG_1472G|VNG_1472G|cdc48b	VNG_1472G	VNG_RS05735	CDC48 family AAAATPase	VNG_RS05735		1.55522	-0.0168465		0.415975		0.537058	1.07908
gene-VNG_1473H|VNG_1473H|VNG_1473H	VNG_1473H	VNG_RS05740	hypothetical protein	VNG_RS05740		2.16979	1.11308				-0.0513846	1.15216
gene-VNG_1474G|VNG_1474G|VNG_1474G	VNG_1474G	VNG_RS05745	alpha/betahydrolase	VNG_RS05745		0.856231	-0.641807				0.962421	0.579687
gene-VNG_1475C|VNG_1475C|VNG_1475C	VNG_1475C	VNG_RS05750	hypothetical protein	VNG_RS05750		3.82273	2.04189				0.270543	1.55436
gene-VNG_1476C|VNG_1476C|VNG_1476C	VNG_1476C	VNG_RS05755	RND family transporter	VNG_RS05755		3.74001	1.68012				0.788392	1.31556
gene-VNG_1478G|VNG_1478G|panB	VNG_1478G	VNG_RS05760	3-methyl -2-oxobutanoatehydroxymethyl transferase	panB		1.0382	0.897352				-0.144494	0.329416
gene-VNG_1479H|VNG_1479H|VNG_1479H	VNG_1479H	VNG_RS05765	hypothetical protein	VNG_RS05765		1.4841	1.72743				0.11854	-0.317795
gene-VNG_1480C|VNG_1480C|VNG_1480C	VNG_1480C	VNG_RS05770	HAD family hydrolase	VNG_RS05770		-0.730677					-0.951849	1.32209
gene-VNG_1481G|VNG_1481G|cysE	VNG_1481G	VNG_RS05775	serineO-acetyl transferase	cysE		0.207262	-0.767338				0.11854	0.90013
gene-VNG_1482G|VNG_1482G|acd5	VNG_1482G	VNG_RS05780	acyl -CoAdehydrogenase family protein	VNG_RS05780		-0.298799	-0.0435478				0.00306319	-0.214245
gene-VNG_1483C|VNG_1483C|VNG_1483C	VNG_1483C	VNG_RS05785	multi protein -bridgingfactor1 family protein	VNG_RS05785		0.233734	0.801136				-0.899382	0.376049
gene-VNG_1484H|VNG_1484H|VNG_1484H	VNG_1484H	VNG_RS05790	hypothetical protein	VNG_RS05790		-0.838674	-1.31988				0.100618	0.424656
gene-VNG_1486a|VNG_1486a|VNG_1486a	VNG_1486a					-0.434284	0.165548				-0.729457	0.173695
gene-VNG_1486H|VNG_1486H|VNG_1486H	VNG_1486H	VNG_RS14220	hypothetical protein	VNG_RS14220			1.68012					-2.07784
gene-VNG_1487H|VNG_1487H|VNG_1487H	VNG_1487H	VNG_RS05795	pyridoxamine5'-phosphateoxidase family protein	VNG_RS05795		0.051143	0.38204				-0.144494	-0.142333
gene-VNG_1488G|VNG_1488G|boa2	VNG_1488G	VNG_RS05800	DNA-binding protein	VNG_RS05800		0.176674	0.0211579				-0.0189631	0.218549
gene-VNG_1490H|VNG_1490H|VNG_1490H	VNG_1490H	VNG_RS05805	helix-turn-helix transcriptionalregulator	VNG_RS05805		0.349007	2.37562				-0.222497	-1.76005
gene-VNG_1492C|VNG_1492C|VNG_1492C	VNG_1492C	VNG_RS05815	DUF420 domain -containing protein	VNG_RS05815		0.654721	1.11308				0.396074	-0.810364
gene-VNG_1493G|VNG_1493G|purF	VNG_1493G	VNG_RS05820	amidophosphoribosyl transferase	purF		-0.701764	-1.44477				0.927656	-0.14058
gene-VNG_1494G|VNG_1494G|rpl37e	VNG_1494G	VNG_RS13345	50Sribosomal protein L37e	VNG_RS13345		0.9072	1.66485				-0.305957	-0.407627
gene-VNG_1496G|VNG_1496G|lsm	VNG_1496G	VNG_RS05825	smallnuclearribonucleo protein	VNG_RS05825		-0.512286	1.14961				-0.691982	-0.925841
gene-VNG_1497C|VNG_1497C|VNG_1497C	VNG_1497C	VNG_RS05840	zinc-dependentmetalloprotease	VNG_RS05840		1.55122	-0.0568446				0.533578	1.11855
gene-VNG_1498a|VNG_1498a|VNG_1498a	VNG_1498a	VNG_RS05835	hypothetical protein	VNG_RS05835			1.52812					-0.340879
gene-VNG_1498G|VNG_1498G|VNG_1498G	VNG_1498G	VNG_RS05830	M42 family metallopeptidase	VNG_RS05830		-0.171249	-0.293884				0.145013	0.0216916
gene-VNG_1500H|VNG_1500H|VNG_1500H	VNG_1500H	VNG_RS05845	hypothetical protein	VNG_RS05845		-0.67375					-0.646994	1.24408
gene-VNG_1501G|VNG_1501G|dna2	VNG_1501G	VNG_RS05850	AAA family ATPase	VNG_RS05850		0.477843	0.918908				-0.281998	-0.114997
gene-VNG_1503C|VNG_1503C|VNG_1503C	VNG_1503C	VNG_RS05855	MBLfoldmetallo-hydrolase	VNG_RS05855		-0.308753	-0.22677				-0.0189631	-0.0189504
gene-VNG_1505G|VNG_1505G|hemAT	VNG_1505G	VNG_RS05860	globin-coupledsensor protein	VNG_RS05860		-0.519173	-0.582913				-0.366886	0.474697
gene-VNG_1506G|VNG_1506G|pelA	VNG_1506G	VNG_RS05865	mRNAsurveillance protein pelota	VNG_RS05865		-0.0643342	-0.0568446				-0.144494	0.181074
gene-VNG_1508C|VNG_1508C|VNG_1508C	VNG_1508C	VNG_RS05870	fibronectin-binding domain -containing protein	VNG_RS05870		-0.101987	-0.3523				-0.320344	0.614727
gene-VNG_1510C|VNG_1510C|elp3	VNG_1510C	VNG_RS05875	tRNAuridine(34)5-carboxymethyl aminomethyl modificationradicalSAM/GNATenzymeElp3	VNG_RS05875		0.816678	0.383728				-0.24403	0.721049
gene-VNG_1511C|VNG_1511C|VNG_1511C	VNG_1511C	VNG_RS05880	S1RNA-binding domain -containing protein	VNG_RS05880		0.0861384	1.03626		-0.435183		-0.822566	-0.0834907
gene-VNG_1513H|VNG_1513H|VNG_1513H	VNG_1513H	VNG_RS05885	hypothetical protein	VNG_RS05885		0.413713	0.284192					0.166081
gene-VNG_1514H|VNG_1514H|VNG_1514H	VNG_1514H	VNG_RS05890	YIP1 family protein	VNG_RS05890		-0.123944	0.559827				-0.729457	0.0897559
gene-VNG_1515G|VNG_1515G|tdk	VNG_1515G	VNG_RS05895	thymidinekinase	VNG_RS05895		0.320604	0.393817				0.177434	-0.206577
gene-VNG_1518H|VNG_1518H|VNG_1518H	VNG_1518H	VNG_RS05900	universalstress protein	VNG_RS05900		-0.623762					-1.25997	1.09969
gene-VNG_1519H|VNG_1519H|VNG_1519H	VNG_1519H	VNG_RS05905	DUF2892 domain -containing protein	VNG_RS05905
gene-VNG_1520a|VNG_1520a|VNG_1520a	VNG_1520a	VNG_RS05915	hypothetical protein	VNG_RS05915		-0.171249	1.02116					-0.418881
gene-VNG_1520G|VNG_1520G|mutY	VNG_1520G	VNG_RS05910	A/G-specificadenineglycosyl ase	VNG_RS05910		-0.00132442	2.16555					0.0216916
gene-VNG_1523G|VNG_1523G|htrVIII	VNG_1523G	VNG_RS05920	methyl -acceptingchemotaxis protein	VNG_RS05920		1.45402	0.0653025				0.586689	0.846099
gene-VNG_1524C|VNG_1524C|VNG_1524C	VNG_1524C	VNG_RS05925	aspartateamino transferase family protein	VNG_RS05925		0.340503	0.495141				0.153187	-0.263754
gene-VNG_1525C|VNG_1525C|VNG_1525C	VNG_1525C	VNG_RS05930	MgtC/SapB family protein	VNG_RS05930		-1.11467	-1.02514				0.533578	-0.579038
gene-VNG_1526G|VNG_1526G|VNG_1526G	VNG_1526G	VNG_RS05935	sodium-dependent transporter	VNG_RS05935		1.02377	-0.409146				0.929507	0.547476
gene-VNG_1528G|VNG_1528G|VNG_1528G	VNG_1528G	VNG_RS05940	sodium-dependent transporter	VNG_RS05940		2.88764						0.444997
gene-VNG_1529G|VNG_1529G|pccB2	VNG_1529G	VNG_RS05945	acyl -CoAcarboxyl asesubunitbeta	VNG_RS05945		0.0575693	0.244022				0.379068	-0.521451
gene-VNG_1530H|VNG_1530H|pccX	VNG_1530H	VNG_RS05950	hypothetical protein	VNG_RS05950
gene-VNG_1532G|VNG_1532G|pccA2	VNG_1532G	VNG_RS05955	acetyl /propionyl /methyl crotonyl -CoAcarboxyl asesubunitalpha	VNG_RS05955		-2.84502	-1.31423				-0.538158	-0.948561
gene-VNG_1533H|VNG_1533H|VNG_1533H	VNG_1533H	VNG_RS05960	hypothetical protein	VNG_RS05960		-0.154761	-0.099014				0.752413	-0.76409
gene-VNG_1534a|VNG_1534a|birA1	VNG_1534a	VNG_RS05965	biotin--[acetyl-CoA-carboxylase] ligase	VNG_RS05965		-0.171249						0.659121
gene-VNG_1534H|VNG_1534H|VNG_1534H	VNG_1534H	VNG_RS14130	hypothetical protein	VNG_RS14130		2.24379	0.165548					0.266804
gene-VNG_1536C|VNG_1536C|VNG_1536C	VNG_1536C	VNG_RS05970	universalstress protein	VNG_RS05970		-1.59751	-1.5638				0.184129	-0.173769
gene-VNG_1537C|VNG_1537C|VNG_1537C	VNG_1537C	VNG_RS05975	HD domain -containing protein	VNG_RS05975		1.47261	0.680121					-0.0189504
gene-VNG_1538H|VNG_1538H|VNG_1538H	VNG_1538H	VNG_RS05980	hypothetical protein	VNG_RS05980		-0.358335	-0.876272				-0.0320193	0.594026
gene-VNG_1540G|VNG_1540G|VNG_1540G	VNG_1540G	VNG_RS05985	SDR family oxidoreductase	VNG_RS05985		1.63611	0.731651				-0.144494	1.09302
gene-VNG_1541G|VNG_1541G|sucC	VNG_1541G	VNG_RS05990	ADP-formingsuccinate--CoAligasesubunitbeta	sucC		0.280739	1.13166		0.267356		-0.135449	-0.671404
gene-VNG_1542G|VNG_1542G|sucD	VNG_1542G	VNG_RS05995	succinate--CoAligasesubunitalpha	sucD		0.224679	1.14009				-0.0996398	-0.771699
gene-VNG_1543G|VNG_1543G|zim	VNG_1543G	VNG_RS06000	site-specificDNA-methyl transferase	VNG_RS06000		0.519066	0.592658				0.483537	-0.513059
gene-VNG_1544G|VNG_1544G|clc	VNG_1544G	VNG_RS06005	chloridechannel protein	VNG_RS06005		1.91621	2.15261				-0.466422	0.274097
gene-VNG_1546a|VNG_1546a|VNG_1546a	VNG_1546a	VNG_RS06025	DUF547 domain-containing protein	VNG_RS06025		1.52919						1.7746
gene-VNG_1546H|VNG_1546H|grx3	VNG_1546H	VNG_RS06020	glutaredoxin	VNG_RS06020
gene-VNG_1547C|VNG_1547C|pduO	VNG_1547C	VNG_RS06015	cob(I)yrinicacida,c-diamideadenosyl transferase	VNG_RS06015		-0.748558	-1.70321				-0.11412	1.11284
gene-VNG_1548C|VNG_1548C|VNG_1548C	VNG_1548C	VNG_RS06030	wingedhelix-turn-helix transcriptionalregulator	VNG_RS06030
gene-VNG_1550G|VNG_1550G|cbiT	VNG_1550G	VNG_RS06035	precorrin-6YC5,15-methyl transferase(decarboxyl ating)subunitCbiT	cbiT		-1.36717	-0.0236777				-0.280472	-1.01895
gene-VNG_1551G|VNG_1551G|cbiL	VNG_1551G	VNG_RS06040	cobalt-factorIIC(20)-methyl transferase	VNG_RS06040		-1.2004	-0.289963				0.340933	-1.2073
gene-VNG_1553G|VNG_1553G|cbiF	VNG_1553G	VNG_RS06045	cobalt-precorrin-4/precorrin-4C(11)-methyl transferase	VNG_RS06045		-1.3579	-0.322227				0.11152	-1.10313
gene-VNG_1554G|VNG_1554G|cbiG	VNG_1554G	VNG_RS06050	cobalt-precorrin5Ahydrolase	cbiG		-1.17656	-0.532508				0.522931	-1.12292
gene-VNG_1555G|VNG_1555G|cbiH1	VNG_1555G	VNG_RS06055	precorrin-3BC(17)-methyl transferase	VNG_RS06055		-1.00232	-0.44076				0.266056	-0.783547
gene-VNG_1557G|VNG_1557G|cbiH2	VNG_1557G	VNG_RS06060	precorrin-3BC(17)-methyl transferase	cobJ		-1.11405	-0.49082		-1.30757		0.502753	-1.08192
gene-VNG_1558H|VNG_1558H|VNG_1558H	VNG_1558H	VNG_RS06065	ferredoxin	VNG_RS06065		-1.39364	-0.689113				0.417385	-1.07784
gene-VNG_1559H|VNG_1559H|VNG_1559H	VNG_1559H	VNG_RS06070	hypothetical protein	VNG_RS06070		-1.31564	-0.46934				0.440468	-1.2427
gene-VNG_1561C|VNG_1561C|cbiX1	VNG_1561C	VNG_RS06075	NAD(P)H-dependent oxidoreductase subunit E	VNG_RS06075		-1.03511	-0.0477136				-0.015211	-0.928118
gene-VNG_1562H|VNG_1562H|VNG_1562H	VNG_1562H	VNG_RS06080	DUF3209 family protein	VNG_RS06080		-1.31385	0.0556302		-0.833413		-0.344432	-0.980983
gene-VNG_1564H|VNG_1564H|VNG_1564H	VNG_1564H	VNG_RS06085	transcriptionalregulator	VNG_RS06085		-1.55654	0.412641		-1.47073		-0.444054	-1.48106
gene-VNG_1565G|VNG_1565G|chlID	VNG_1565G	VNG_RS06090	magnesiumchelatasesubunitD family protein	VNG_RS06090		-4.40007	-2.37877				-0.24403	-1.7332
gene-VNG_1566G|VNG_1566G|cobN	VNG_1566G	VNG_RS06095	cobaltochelatasesubunitCobN	cobN		-2.90756	-2.32513				0.704159	-1.24251
gene-VNG_1567G|VNG_1567G|cbiC	VNG_1567G	VNG_RS06100	precorrin-8Xmethyl mutase	VNG_RS06100		-2.96567	-2.28671		-2.73793		0.487355	-1.12224
gene-VNG_1568G|VNG_1568G|cbiE	VNG_1568G	VNG_RS06105	cobalt-precorrin-7(C(5))-methyl transferase	VNG_RS06105		-2.77215	-2.48374				0.917567	-1.16191
gene-VNG_1570H|VNG_1570H|cbiX3	VNG_1570H	VNG_RS06110	sirohydrochlorinchelatase	VNG_RS06110		0.883198	0.296792				-0.259971	0.890447
gene-VNG_1572C|VNG_1572C|cobT	VNG_1572C	VNG_RS06115	nicotinate-nucleotide--dimethyl benzimidazolephosphoribosyl transferase	VNG_RS06115		-3.34117	-2.05684				0.0481511	-1.28841
gene-VNG_1573G|VNG_1573G|cbiA	VNG_1573G	VNG_RS06120	cobyrinicacida,c-diamidesynthase	VNG_RS06120		-3.82333	-0.98973				-0.796571	-1.99296
gene-VNG_1574G|VNG_1574G|cobA	VNG_1574G	VNG_RS06125	cob(I)yrinicacida,c-diamideadenosyl transferase	VNG_RS06125		-3.28673	-1.92191				0.242529	-1.56327
gene-VNG_1576G|VNG_1576G|cbiP	VNG_1576G	VNG_RS06130	cobyricacidsynthase	VNG_RS06130		-2.40391	-1.64181				-0.792192	0.074159
gene-VNG_1577C|VNG_1577C|VNG_1577C	VNG_1577C	VNG_RS06135	HAD family hydrolase	VNG_RS06135
gene-VNG_1578H|VNG_1578H|cbiB	VNG_1578H	VNG_RS06140	cobalaminbiosynthesis protein	VNG_RS06140			0.358193					-0.925841
gene-VNG_1580H|VNG_1580H|cobS	VNG_1580H	VNG_RS06145	adenosyl cobinamide-GDPribazole transferase	cobS
gene-VNG_1581C|VNG_1581C|cobY	VNG_1581C	VNG_RS06150	NTP transferase domain -containing protein	VNG_RS06150		-0.171249	0.358193					-0.340879
gene-VNG_1582G|VNG_1582G|cobD	VNG_1582G	VNG_RS06155	threonine-phosphatedecarboxyl ase	VNG_RS06155		0.128311	1.31239				-0.844934	-0.295075
gene-VNG_1583C|VNG_1583C|cbiZ	VNG_1583C	VNG_RS06160	adenosyl cobinamideamidohydrolaseCbiZ	cbiZ
gene-VNG_1589C|VNG_1589C|VNG_1589C	VNG_1589C	VNG_RS06185	hypothetical protein	VNG_RS06185		-1.52489	-1.51628				-0.208624	0.244084
gene-VNG_1591H|VNG_1591H|VNG_1591H	VNG_1591H	VNG_RS14225	hypothetical protein	VNG_RS14225			0.528118					-0.510804
gene-VNG_1592G|VNG_1592G|VNG_1592G	VNG_1592G	VNG_RS06195	ABC transporter permeasesubunit	VNG_RS06195		3.91621						1.93923
gene-VNG_1595C|VNG_1595C|VNG_1595C	VNG_1595C	VNG_RS06200	extracellularsolute-binding protein	VNG_RS06200		4.54757	-0.0992798				3.79411	0.896813
gene-VNG_1598a|VNG_1598a|tfx	VNG_1598a	VNG_RS06205	Tfx family DNA-binding protein	VNG_RS06205		3.16503	1.46672					0.208809
gene-VNG_1598H|VNG_1598H|VNG_1598H	VNG_1598H
gene-VNG_1601G|VNG_1601G|gcvP2	VNG_1601G	VNG_RS06210	aminomethyl - transferringglycinedehydrogenasesubunitGcvPB	gcvPB		-0.72379	-0.871289				0.483537	-0.291969
gene-VNG_1603G|VNG_1603G|gcvP1	VNG_1603G	VNG_RS06215	aminomethyl - transferringglycinedehydrogenasesubunitGcvPA	gcvPA		-0.943444	-0.864199				-0.000104092	-0.0350701
gene-VNG_1605G|VNG_1605G|gcvH	VNG_1605G	VNG_RS06220	glycinecleavagesystem protein GcvH	gcvH		-0.858659	-0.116716				0.258862	-0.956735
gene-VNG_1606G|VNG_1606G|gcvT	VNG_1606G	VNG_RS06225	glycinecleavagesystemaminomethyl transferaseGcvT	gcvT		-0.6627	-0.0989086				0.32117	-0.840891
gene-VNG_1607G|VNG_1607G|cheC2	VNG_1607G	VNG_RS06230	chemotaxis protein CheC	VNG_RS06230		-0.992912	-1.39388				-0.392422	0.837459
gene-VNG_1608C|VNG_1608C|VNG_1608C	VNG_1608C	VNG_RS06235	NYN domain -containing protein	VNG_RS06235		0.828751	2.68012		0.809003			-1.07784
gene-VNG_1609C|VNG_1609C|VNG_1609C	VNG_1609C	VNG_RS06240	TIGR00266 family protein	VNG_RS06240		-2.31881	-2.35346				0.50576	-0.427035
gene-VNG_1610C|VNG_1610C|tatD	VNG_1610C	VNG_RS06245	TatD family hydrolase	VNG_RS06245		-0.382754	1.68012				-1.60393	-0.414879
gene-VNG_1611C|VNG_1611C|VNG_1611C	VNG_1611C	VNG_RS06250	DUF2150 family protein	VNG_RS06250		-0.292556	0.45335				-0.639259	-0.0625773
gene-VNG_1613H|VNG_1613H|VNG_1613H	VNG_1613H	VNG_RS06255	Ig-like domain-containing protein	VNG_RS06255		-0.939303	-1.02428				0.619066	-0.490022
gene-VNG_1615G|VNG_1615G|hmgB	VNG_1615G	VNG_RS06260	hydroxymethyl glutaryl -CoAsynthase family protein	VNG_RS06260		-1.17125	0.990461				-0.523006	-1.59464
gene-VNG_1616C|VNG_1616C|VNG_1616C	VNG_1616C	VNG_RS06270	helix-turn-helix domain -containing protein	VNG_RS06270		-2.17125	0.528118				-1.46642	-1.18888
gene-VNG_1617H|VNG_1617H|VNG_1617H	VNG_1617H	VNG_RS06275	GNAT family N-acetyl transferase	VNG_RS06275		0.288182	0.528118					-0.0513719
gene-VNG_1618H|VNG_1618H|VNG_1618H	VNG_1618H	VNG_RS06265	NAD(P)H-dependentoxidoreductase	VNG_RS06265		1.08509	0.559827					0.561824
gene-VNG_1619H|VNG_1619H|VNG_1619H	VNG_1619H	VNG_RS06280	hypothetical protein	VNG_RS06280		0.0213957	0.47367				-0.366886	-0.0413182
gene-VNG_1621H|VNG_1621H|VNG_1621H	VNG_1621H	VNG_RS06285	pyridoxamine5'-phosphateoxidase family protein	VNG_RS06285		-0.959745	0.817625				-0.392422	-1.34088
gene-VNG_1622G|VNG_1622G|rfcB	VNG_1622G	VNG_RS06290	replicationfactorClargesubunit	VNG_RS06290		0.74164	0.901091				-0.286513	0.171131
gene-VNG_1623G|VNG_1623G|ctaA	VNG_1623G	VNG_RS06295	hemeAsynthase	VNG_RS06295		-0.300532	1.14246				-1.10385	-0.295075
gene-VNG_1624G|VNG_1624G|maeB	VNG_1624G	VNG_RS06300	NADP-dependentmalicenzyme	VNG_RS06300		-0.73653	-0.645492				0.377459	-0.424426
gene-VNG_1625H|VNG_1625H|rnhA1	VNG_1625H	VNG_RS06305	hypothetical protein	VNG_RS06305		1.34425	0.0211579				0.155066	1.21209
gene-VNG_1626C|VNG_1626C|VNG_1626C	VNG_1626C	VNG_RS06310	EamA family transporter	VNG_RS06310
gene-VNG_1628G|VNG_1628G|VNG_1628G	VNG_1628G	VNG_RS06315	aldo/ketoreductase	VNG_RS06315		-0.817612	0.756742				-0.854987	-0.675298
gene-VNG_1630H|VNG_1630H|VNG_1630H	VNG_1630H	VNG_RS06320	hypothetical protein	VNG_RS06320		-0.227833	0.0462489				0.324991	-0.555003
gene-VNG_1631G|VNG_1631G|cbiO	VNG_1631G	VNG_RS06325	ABC transporter ATP-binding protein	VNG_RS06325		-0.565528	0.83624				-0.860701	-0.496998
gene-VNG_1632G|VNG_1632G|cbiQ	VNG_1632G	VNG_RS06330	cobaltECF transporter TcomponentCbiQ	cbiQ		-1.94384	-1.58736	-0.324			0.198394	-0.510804
gene-VNG_1634G|VNG_1634G|cbiN	VNG_1634G	VNG_RS06335	energy-couplingfactorABC transporter substrate-binding protein	VNG_RS06335		-1.75621	-1.24588	-0.58			-0.0664915	-0.399772
gene-VNG_1635G|VNG_1635G|cbiM	VNG_1635G	VNG_RS06340	energy-couplingfactorABC transporter permease	VNG_RS06340		-1.09596	-0.391264				-0.0938679	-0.56676
gene-VNG_1637G|VNG_1637G|hcpA	VNG_1637G	VNG_RS06345	halocyanin	VNG_RS06345		-1.5152	-4.29388				1.27054	1.55221
gene-VNG_1638H|VNG_1638H|VNG_1638H	VNG_1638H	VNG_RS06355	hypothetical protein	VNG_RS06355		0.204766	-0.298323				-0.0810686	0.628227
gene-VNG_1640H|VNG_1640H|VNG_1640H	VNG_1640H	VNG_RS06360	hypothetical protein	VNG_RS06360		1.07668	-0.641807					-0.092951
gene-VNG_1641H|VNG_1641H|VNG_1641H	VNG_1641H	VNG_RS06365	TVP38/TMEM64 family protein	VNG_RS06365
gene-VNG_1642H|VNG_1642H|VNG_1642H	VNG_1642H					4.61011	2.73516				2.02543	-0.106413
gene-VNG_1644G|VNG_1644G|nrdJ	VNG_1644G	VNG_RS06370	adenosyl cobalamin-dependentribonucleoside-diphosphatereductase	VNG_RS06370		2.97651	2.66443		1.59641		0.781069	-0.424918
gene-VNG_1645H|VNG_1645H|VNG_1645H	VNG_1645H	VNG_RS06375	hypothetical protein	VNG_RS06375		-0.171249	-0.0568446					0.074159
gene-VNG_1646G|VNG_1646G|trpG1	VNG_1646G	VNG_RS06380	aminodeoxychorismate/anthranilatesynthasecomponentII	VNG_RS06380
gene-VNG_1647G|VNG_1647G|trpE1	VNG_1647G	VNG_RS06385	anthranilatesynthasecomponentI	trpE			0.680121					-0.855452
gene-VNG_1648G|VNG_1648G|trpF	VNG_1648G	VNG_RS06390	N-(5'-phosphoribosyl )anthranilateisomerase	VNG_RS06390
gene-VNG_1649a|VNG_1649a|VNG_1649a	VNG_1649a
gene-VNG_1649G|VNG_1649G|trpD1	VNG_1649G	VNG_RS06395	anthranilatephosphoribosyl transferase	trpD
gene-VNG_1654G|VNG_1654G|aaa4	VNG_1654G	VNG_RS13355	ATP-binding protein	VNG_RS13355		2.58364						2.09208
gene-VNG_1655H|VNG_1655H|VNG_1655H	VNG_1655H	VNG_RS06415	hypothetical protein	VNG_RS06415		-1.49318	-1.46123				0.440468	-0.428341
gene-VNG_1656H|VNG_1656H|VNG_1656H	VNG_1656H	VNG_RS06425	hypothetical protein	VNG_RS06425		0.828751	1.68012					0.337193
gene-VNG_1657H|VNG_1657H|VNG_1657H	VNG_1657H	VNG_RS06420	PGF-CTERMsorting domain -containing protein	VNG_RS06420		-1.77893	-1.71581				0.177434	-0.196489
gene-VNG_1658C|VNG_1658C|VNG_1658C	VNG_1658C	VNG_RS06430	universalstress protein	VNG_RS06430		1.19132	0.0102696				0.855506	0.369615
gene-VNG_1659G|VNG_1659G|htrI	VNG_1659G	VNG_RS06435	HAMP domain -containing protein	VNG_RS06435		-1.70527	-1.93625		-1.32337		0.140908	0.134141
gene-VNG_1660G|VNG_1660G|sopI	VNG_1660G	VNG_RS06440	bacteriorhodopsin	VNG_RS06440		-1.75621	-1.94847				0.432815	-0.196489
gene-VNG_1663C|VNG_1663C|VNG_1663C	VNG_1663C	VNG_RS06445	CBS domain -containing protein	VNG_RS06445		-0.7956	-1.09501		-0.493906		0.218076	0.125405
gene-VNG_1664H|VNG_1664H|VNG_1664H	VNG_1664H	VNG_RS06450	hypothetical protein	VNG_RS06450		-0.609371	-0.641807				-0.0773798	0.153886
gene-VNG_1665G|VNG_1665G|radB	VNG_1665G	VNG_RS06455	DNA repairandrecombination protein RadB	radB		-0.393642	-0.582913				0.0481511	0.18519
gene-VNG_1666H|VNG_1666H|VNG_1666H	VNG_1666H	VNG_RS06460	NAD(P)-dependentoxidoreductase	VNG_RS06460		-1.04572	-0.319879				-0.188888	-0.492882
gene-VNG_1667G|VNG_1667G|cdc48a	VNG_1667G	VNG_RS06465	CDC48 family AAAATPase	VNG_RS06465		-0.616905	-1.58798				0.841861	0.173288
gene-VNG_1668G|VNG_1668G|rps8e	VNG_1668G	VNG_RS06470	30Sribosomal protein S8e	VNG_RS06470		-1.11941	0.335473				-0.502046	-0.908767
gene-VNG_1670C|VNG_1670C|VNG_1670C	VNG_1670C	VNG_RS06475	DUF2240 family protein	VNG_RS06475		0.52919	-0.504304					0.90013
gene-VNG_1672H|VNG_1672H|VNG_1672H	VNG_1672H	VNG_RS06480	hypothetical protein	VNG_RS06480
gene-VNG_1673G|VNG_1673G|pyrF	VNG_1673G	VNG_RS06485	orotidine-5'-phosphatedecarboxyl ase	pyrF		-0.0557722						-0.0998704
gene-VNG_1674H|VNG_1674H|VNG_1674H	VNG_1674H	VNG_RS14230	hypothetical protein	VNG_RS14230
gene-VNG_1675a|VNG_1675a|VNG_1675a	VNG_1675a	VNG_RS06495	HAD family hydrolase	VNG_RS06495		1.12421	1.31239				-0.603926	0.459813
gene-VNG_1675H|VNG_1675H|VNG_1675H	VNG_1675H	VNG_RS06490	J domain -containing protein	VNG_RS06490		-1.0526	-0.263295				-0.951849	0.206609
gene-VNG_1676G|VNG_1676G|VNG_1676G	VNG_1676G	VNG_RS06500	GTP-binding protein	VNG_RS06500		-0.768979	-1.2186				0.0733516	0.420335
gene-VNG_1678H|VNG_1678H|VNG_1678H	VNG_1678H	VNG_RS06505	hypothetical protein	VNG_RS06505		-0.171249	-1.41941				0.192541	1.09969
gene-VNG_1679H|VNG_1679H|VNG_1679H	VNG_1679H	VNG_RS06510	hypothetical protein	VNG_RS06510		-3.07814					-1.05138
gene-VNG_1680G|VNG_1680G|crtB2	VNG_1680G	VNG_RS06515	phytoene/squalenesynthase family protein	VNG_RS06515		-0.711818	-0.419415				-0.296497	0.0481638
gene-VNG_1681C|VNG_1681C|cruF	VNG_1681C	VNG_RS06520	carotenoidbiosynthesis protein	VNG_RS06520			1.52812					-0.703449
gene-VNG_1682C|VNG_1682C|lyeJ	VNG_1682C	VNG_RS06525	prenyl transferase	VNG_RS06525		-0.0837866						0.746584
gene-VNG_1684G|VNG_1684G|crtD	VNG_1684G	VNG_RS06530	phytoenedesaturase	crtI		-0.434284	0.47367				-0.523006	-0.340879
gene-VNG_1686G|VNG_1686G|mch	VNG_1686G	VNG_RS06535	methenyltetrahydromethanopterin cyclohydrolase	VNG_RS06535		-0.29678	-0.16376				0.0778984	-0.166849
gene-VNG_1687C|VNG_1687C|VNG_1687C	VNG_1687C	VNG_RS06540	MFS transporter	VNG_RS06540		1.12992	1.56765				-0.951849	0.558193
gene-VNG_1688C|VNG_1688C|VNG_1688C	VNG_1688C	VNG_RS06550	hypothetical protein	VNG_RS06550		-1.08135	0.459392				-0.176583	-1.32009
gene-VNG_1689G|VNG_1689G|rpl3	VNG_1689G	VNG_RS06555	50Sribosomal protein L3	VNG_RS06555		-0.529097	1.38526		-0.536587		-0.767803	-1.10249
gene-VNG_1690G|VNG_1690G|rpl4	VNG_1690G	VNG_RS06560	50Sribosomal protein L4	rpl4p		-0.861921	0.999739		-0.808185		-0.609162	-1.20843
gene-VNG_1691G|VNG_1691G|rpl23	VNG_1691G	VNG_RS06565	50Sribosomal protein L23	VNG_RS06565		-0.813202	1.25631	-0.533			-0.83481	-1.19064
gene-VNG_1692G|VNG_1692G|rpl2	VNG_1692G	VNG_RS06570	50Sribosomal protein L2	VNG_RS06570		-0.581234	1.16075	-0.594	-0.731925		-0.288085	-1.40983
gene-VNG_1693G|VNG_1693G|rps19	VNG_1693G	VNG_RS06575	30Sribosomal protein S19	VNG_RS06575		-0.891142	1.52812		-0.917842		-0.703921	-1.67127
gene-VNG_1695G|VNG_1695G|rpl22	VNG_1695G	VNG_RS06580	50Sribosomal protein L22	VNG_RS06580		-0.683311	1.29881	-0.523	-0.909418		-0.54785	-1.39021
gene-VNG_1697G|VNG_1697G|rps3	VNG_1697G	VNG_RS06585	30Sribosomal protein S3	VNG_RS06585		-0.847811	1.08293		-0.617277		-0.455136	-1.43153
gene-VNG_1698G|VNG_1698G|rpl29	VNG_1698G	VNG_RS06590	50Sribosomal protein L29	rpmC		-0.785596	0.727427	-0.535			-0.513728	-0.955225
gene-VNG_1699C|VNG_1699C|rnp1	VNG_1699C	VNG_RS06595	ribonucleaseP protein component1	VNG_RS06595		-0.858092	1.34997				-0.729457	-1.43454
gene-VNG_1700G|VNG_1700G|rps17	VNG_1700G	VNG_RS06600	30Sribosomal protein S17	VNG_RS06600		-0.824599	1.92805		-1.03741		-1.48434	-1.22423
gene-VNG_1701G|VNG_1701G|rpl14	VNG_1701G	VNG_RS06605	50Sribosomal protein L14	VNG_RS06605		-1.17125	1.29849				-0.979435	-1.44623
gene-VNG_1702G|VNG_1702G|rpl24	VNG_1702G	VNG_RS06610	50Sribosomal protein L24	VNG_RS06610		-1.09429	1.48018				-1.24686	-1.28355
gene-VNG_1703G|VNG_1703G|rps4e	VNG_1703G	VNG_RS06615	30Sribosomal protein S4e	VNG_RS06615		-1.22072	1.48748				-1.1608	-1.50333
gene-VNG_1705G|VNG_1705G|rpl5	VNG_1705G	VNG_RS06620	50Sribosomal protein L5	VNG_RS06620		-0.99722	1.44566				-1.10797	-1.29084
gene-VNG_1706G|VNG_1706G|rps14	VNG_1706G	VNG_RS06625	30Sribosomal protein S14	VNG_RS06625		-1.39802	1.43348		-1.03298		-1.1185	-1.66893
gene-VNG_1707G|VNG_1707G|rps8	VNG_1707G	VNG_RS06630	30Sribosomal protein S8	VNG_RS06630		-1.1285	1.45773		-1.09326		-1.07049	-1.47167
gene-VNG_1709G|VNG_1709G|rpl6	VNG_1709G	VNG_RS06635	50Sribosomal protein L6	VNG_RS06635		-1.07583	1.75873		0.413919		-1.371	-1.41949
gene-VNG_1711G|VNG_1711G|rpl32e	VNG_1711G	VNG_RS06640	50Sribosomal protein L32e	VNG_RS06640		-0.959745	1.20045		-0.94203		-0.585067	-1.53106
gene-VNG_1713G|VNG_1713G|rpl19e	VNG_1713G	VNG_RS06645	50Sribosomal protein L19e	VNG_RS06645		-1.50828	1.03062		-1.13448		-0.729457	-1.76538
gene-VNG_1714G|VNG_1714G|rpl18	VNG_1714G	VNG_RS06650	50Sribosomal protein L18	VNG_RS06650		-1.58036	1.07091		-0.67738		-0.729457	-1.87775
gene-VNG_1715G|VNG_1715G|rps5	VNG_1715G	VNG_RS06655	30Sribosomal protein S5	VNG_RS06655		-1.30731	1.81762				-1.70089	-1.37998
gene-VNG_1716G|VNG_1716G|rpl30	VNG_1716G	VNG_RS06660	50Sribosomal protein L30	rpmD		-1.72873	1.63503		-0.665203		-1.72946	-1.59024
gene-VNG_1718G|VNG_1718G|rpl15	VNG_1718G	VNG_RS06665	50Sribosomal protein L15	VNG_RS06665		-1.45243	1.07642				-0.77526	-1.70952
gene-VNG_1719G|VNG_1719G|secY	VNG_1719G	VNG_RS06670	pre protein translocasesubunitSecY	secY		-1.61409	0.708292				-0.821295	-1.45702
gene-VNG_1720H|VNG_1720H|VNG_1720H	VNG_1720H	VNG_RS06675	ABC transporter substrate-binding protein	VNG_RS06675		2.17453	-0.0568446				2.59247	-0.317032
gene-VNG_1721G|VNG_1721G|trkH2	VNG_1721G	VNG_RS06685	potassium transporter Trk	VNG_RS06685		-0.919711	-0.544946				0.0481511	-0.378846
gene-VNG_1723H|VNG_1723H|VNG_1723H	VNG_1723H	VNG_RS06690	hypothetical protein	VNG_RS06690		-0.238364	-0.22677				-0.0189631	0.0514389
gene-VNG_1724G|VNG_1724G|adk1	VNG_1724G	VNG_RS06695	adenyl atekinase	VNG_RS06695		-0.0261991	0.258657				0.0619569	-0.302743
gene-VNG_1726G|VNG_1726G|VNG_1726G	VNG_1726G	VNG_RS06700	DUF106 domain -containing protein	VNG_RS06700		0.0720217	-0.253536				0.328259	0.0413691
gene-VNG_1727G|VNG_1727G|cmk	VNG_1727G	VNG_RS06705	AAA family ATPase	VNG_RS06705		-0.171249	0.736705				-0.992491	0.128607
gene-VNG_1729G|VNG_1729G|cbf5	VNG_1729G	VNG_RS06710	RNA-guidedpseudouridyl ationcomplexpseudouridinesynthasesubunitCbf5	VNG_RS06710		-0.382754	-0.419415				0.565999	-0.485268
gene-VNG_1732C|VNG_1732C|VNG_1732C	VNG_1732C	VNG_RS06720	pentapeptiderepeat-containing protein	VNG_RS06720		-0.756212	-0.52633					-0.456356
gene-VNG_1733G|VNG_1733G|htr17	VNG_1733G	VNG_RS06725	methyl -acceptingchemotaxis protein	VNG_RS06725		-0.586287	0.727427				0.11854	-1.38818
gene-VNG_1734H|VNG_1734H|VNG_1734H	VNG_1734H	VNG_RS06730	hypothetical protein	VNG_RS06730
gene-VNG_1735C|VNG_1735C|VNG_1735C	VNG_1735C	VNG_RS06735	MOSC domain -containing protein	VNG_RS06735		-0.434284	0.899339				-0.0290168	-1.26054
gene-VNG_1737H|VNG_1737H|VNG_1737H	VNG_1737H	VNG_RS06740	hypothetical protein	VNG_RS06740		-0.515204	2.05863				-1.38153	-1.14823
gene-VNG_1739G|VNG_1739G|VNG_1739G	VNG_1739G	VNG_RS06745	HtlC	VNG_RS06745		0.288182	0.340915				0.440468	-0.449131
gene-VNG_1740a|VNG_1740a|VNG_1740a	VNG_1740a	VNG_RS06755	hypothetical protein	VNG_RS06755		-3.01925	-1.22677				-0.144494	-1.60391
gene-VNG_1740C|VNG_1740C|VNG_1740C	VNG_1740C	VNG_RS06750	hypothetical protein	VNG_RS06750		-1.56718	-0.599987				-0.700887	-0.222234
gene-VNG_1743C|VNG_1743C|tfs2	VNG_1743C	VNG_RS06760	transcription factor S	VNG_RS06760		-0.48844	-0.385467				-0.222497	0.163594
gene-VNG_1744H|VNG_1744H|VNG_1744H	VNG_1744H	VNG_RS06765	ZIP family metal transporter	VNG_RS06765		-1.73953	-2.37877				-0.374362	1.05767
gene-VNG_1746C|VNG_1746C|VNG_1746C	VNG_1746C	VNG_RS06770	DUF2071 domain -containing protein	VNG_RS06770		-0.334748	-0.876272				-0.0449583	0.630552
gene-VNG_1748C|VNG_1748C|VNG_1748C	VNG_1748C	VNG_RS06775	SDR family oxidoreductase	VNG_RS06775		-0.047867	-0.368789				-0.366886	0.731878
gene-VNG_1749G|VNG_1749G|VNG_1749G	VNG_1749G	VNG_RS06780	redox-regulatedATPaseYchF	VNG_RS06780		-0.802016	-1.4008				0.729975	-0.0871219
gene-VNG_1751H|VNG_1751H|VNG_1751H	VNG_1751H	VNG_RS06785	PAS domain -containing protein	VNG_RS06785		-1.61419	-1.51842				0.219917	-0.271616
gene-VNG_1752C|VNG_1752C|VNG_1752C	VNG_1752C	VNG_RS06790	universalstress protein	VNG_RS06790		0.461019	1.35819		-0.313477		-0.88146	0.0283553
gene-VNG_1754G|VNG_1754G|phr1	VNG_1754G	VNG_RS06795	deoxyribodipyrimidinephoto-lyase	VNG_RS06795		-1.46076	-1.83884				-0.0493368	0.471494
gene-VNG_1755G|VNG_1755G|crtI2	VNG_1755G	VNG_RS06800	phytoenedesaturase	crtI		-2.09463	-1.80101				-0.444727	0.195174
gene-VNG_1756G|VNG_1756G|tif1A2	VNG_1756G	VNG_RS06805	translationinitiationfactoreIF-1A	VNG_RS06805		-0.215305	0.438192				-0.366886	-0.242541
gene-VNG_1758H|VNG_1758H|VNG_1758H	VNG_1758H	VNG_RS06810	hypothetical protein	VNG_RS06810		1.99868	2.05863					0.713569
gene-VNG_1759G|VNG_1759G|htrVII	VNG_1759G	VNG_RS06815	methyl -acceptingchemotaxis protein	VNG_RS06815		0.532549	0.060807				0.483537	0.0322749
gene-VNG_1760G|VNG_1760G|cosT	VNG_1760G	VNG_RS06820	methyl -acceptingchemotaxis protein	VNG_RS06820		0.268108	-0.351217				0.808585	-0.14519
gene-VNG_1762b|VNG_1762b|VNG_1762b	VNG_1762b											1.24408
gene-VNG_1762G|VNG_1762G|cosB	VNG_1762G	VNG_RS06825	ABC transporter	VNG_RS06825		0.0213957	-0.184949				0.398648	-0.148233
gene-VNG_1764G|VNG_1764G|sopII	VNG_1764G	VNG_RS06830	bacteriorhodopsin	VNG_RS06830		1.24379	2.94316					-0.340879
gene-VNG_1765G|VNG_1765G|htrII	VNG_1765G	VNG_RS06835	HAMP domain -containing protein	VNG_RS06835		1.75949	1.61872				0.440468	-0.255631
gene-VNG_1766C|VNG_1766C|VNG_1766C	VNG_1766C	VNG_RS06840	Nif3-likedinuclearmetalcenterhexameric protein	VNG_RS06840		-0.434284	1.56765				-1.05138	-0.906476
gene-VNG_1767G|VNG_1767G|speB	VNG_1767G	VNG_RS06845	agmatinase	speB		0.0382039	0.513471				0.314938	-0.746135
gene-VNG_1768G|VNG_1768G|tef5A	VNG_1768G	VNG_RS06850	translationinitiationfactorIF-5A	VNG_RS06850		0.115632	1.18601				-0.466422	-0.559888
gene-VNG_1769C|VNG_1769C|cre2	VNG_1769C	VNG_RS06855	creatininase family protein	VNG_RS06855		1.41371	2.75051					0.436729
gene-VNG_1770C|VNG_1770C|VNG_1770C	VNG_1770C	VNG_RS06860	AarF/ABC 1/UbiBkinase family protein	VNG_RS06860		-0.350799	-0.357711				0.125346	-0.0743635
gene-VNG_1771C|VNG_1771C|hsp20C	VNG_1771C	VNG_RS06865	Hsp20/alphacrystallin family protein	VNG_RS06865		-0.568585	0.46253				-0.577453	-0.409591
gene-VNG_1772G|VNG_1772G|VNG_1772G	VNG_1772G	VNG_RS06870	HAD family hydrolase	VNG_RS06870		2.37624	1.28711				0.855506	0.277692
gene-VNG_1773G|VNG_1773G|cad	VNG_1773G	VNG_RS06875	4a-hydroxytetrahydrobiopterindehydratase	VNG_RS06875		1.61535	1.01716				0.196543	0.445718
gene-VNG_1774G|VNG_1774G|hemA	VNG_1774G	VNG_RS06880	glutamyl -tRNAreductase	VNG_RS06880		0.446031	0.634524				-0.339141	0.194718
gene-VNG_1775C|VNG_1775C|sirC	VNG_1775C	VNG_RS06885	hypothetical protein	VNG_RS06885		0.0716071	0.151742				-0.144494	0.108429
gene-VNG_1776G|VNG_1776G|ahbB	VNG_1776G	VNG_RS06890	Lrp/AsnC family transcriptionalregulator	VNG_RS06890		0.683934	0.263196				0.0521979	0.41261
gene-VNG_1777H|VNG_1777H|VNG_1777H	VNG_1777H	VNG_RS06895	hypothetical protein	VNG_RS06895		-0.0557722	0.358193					-0.225401
gene-VNG_1779C|VNG_1779C|uppS1	VNG_1779C	VNG_RS06900	di- trans,poly-cis-decaprenyl cis transferase	uppS		0.76735	0.75051					-0.209634
gene-VNG_1781C|VNG_1781C|uppS2	VNG_1781C	VNG_RS06905	undecaprenyl diphosphate synthase family protein	VNG_RS06905		-2.25871	-1.94666				0.160361	-0.428341
gene-VNG_1782C|VNG_1782C|VNG_1782C	VNG_1782C	VNG_RS06910	TIGR00297 family protein	VNG_RS06910		-1.46671	-0.118245				-0.899382	-0.405009
gene-VNG_1783H|VNG_1783H|VNG_1783H	VNG_1783H	VNG_RS06920	DUF3311 domain -containing protein	VNG_RS06920
gene-VNG_1784C|VNG_1784C|dnaG	VNG_1784C	VNG_RS06915	DNAprimase	VNG_RS06915		0.063967	0.293098				-0.641994	0.456933
gene-VNG_1785G|VNG_1785G|VNG_1785G	VNG_1785G	VNG_RS06925	sodium:solutesymporter	VNG_RS06925		-0.171249	-0.811732				0.324991	0.359561
gene-VNG_1786H|VNG_1786H|VNG_1786H	VNG_1786H	VNG_RS06930	PadR family transcriptionalregulator	VNG_RS06930
gene-VNG_1787H|VNG_1787H|VNG_1787H	VNG_1787H	VNG_RS06935	hypothetical protein	VNG_RS06935
gene-VNG_1788C|VNG_1788C|VNG_1788C	VNG_1788C	VNG_RS06940	hypothetical protein	VNG_RS06940		0.0213957	0.265084				-0.366886	0.167268
gene-VNG_1790H|VNG_1790H|VNG_1790H	VNG_1790H	VNG_RS06945	DsrE family protein	VNG_RS06945		0.636106						1.24408
gene-VNG_1791C|VNG_1791C|VNG_1791C	VNG_1791C	VNG_RS06950	DUF1405 domain -containing protein	VNG_RS06950		0.450239	1.44566				0.155066	-1.10641
gene-VNG_1793C|VNG_1793C|pdxS	VNG_1793C	VNG_RS06955	pyridoxal5'-phosphatesynthaselyasesubunitPdxS	pdxS		0.648868	1.19576				-0.512003	0.00917897
gene-VNG_1794C|VNG_1794C|VNG_1794C	VNG_1794C	VNG_RS06960	thermonuclease family protein	VNG_RS06960		1.71327	-0.885078				2.01305	0.629374
gene-VNG_1795C|VNG_1795C|VNG_1795C	VNG_1795C	VNG_RS06970	NAD(P)/FAD-dependentoxidoreductase	VNG_RS06970		0.207262	0.817625				0.533578	-1.09987
gene-VNG_1796a|VNG_1796a|VNG_1796a	VNG_1796a	VNG_RS06980	hypothetical protein	VNG_RS06980		0.966254	0.680121				0.11854	0.211663
gene-VNG_1796H|VNG_1796H|VNG_1796H	VNG_1796H	VNG_RS06975	hypothetical protein	VNG_RS06975
gene-VNG_1797G|VNG_1797G|thrB	VNG_1797G	VNG_RS06965	homoserinekinase	VNG_RS06965		0.314177	0.943155				-0.88146	0.296551
gene-VNG_1798H|VNG_1798H|VNG_1798H	VNG_1798H	VNG_RS06985	hypothetical protein	VNG_RS06985		2.32832	1.31441				0.521087	0.536893
gene-VNG_1800H|VNG_1800H|VNG_1800H	VNG_1800H	VNG_RS06990	hypothetical protein	VNG_RS06990		0.859253	1.74535				0.307069	-1.1491
gene-VNG_1801G|VNG_1801G|hsp20F	VNG_1801G	VNG_RS06995	Hsp20/alphacrystallin family protein	VNG_RS06995		-0.76901	-3.96374	1.006			1.20846	2.03033
gene-VNG_1802H|VNG_1802H|VNG_1802H	VNG_1802H	VNG_RS07000	hypothetical protein	VNG_RS07000		-0.589245	-4.05878		2.51094		1.64021	1.87339
gene-VNG_1804G|VNG_1804G|VNG_1804G	VNG_1804G	VNG_RS07005	NAD(P)/FAD-dependentoxidoreductase	VNG_RS07005		-0.531425	0.2664				0.0341033	-0.787859
gene-VNG_1806H|VNG_1806H|VNG_1806H	VNG_1806H	VNG_RS07010	hypothetical protein	VNG_RS07010		-0.683028	-2.37741				1.53113	0.207325
gene-VNG_1807H|VNG_1807H|VNG_1807H	VNG_1807H	VNG_RS07015	hypothetical protein	VNG_RS07015		1.7805	-0.410482				1.13114	1.10391
gene-VNG_1809H|VNG_1809H|VNG_1809H	VNG_1809H	VNG_RS07020	hypothetical protein	VNG_RS07020		1.28818	0.422323				-0.144494	1.05442
gene-VNG_1811G|VNG_1811G|ereB	VNG_1811G	VNG_RS07025	erythromycinesterase family protein	VNG_RS07025		1.59429	1.25128					-0.953855
gene-VNG_1814G|VNG_1814G|carB	VNG_1814G	VNG_RS07030	carbamoyl -phosphatesynthaselargesubunit	carB		1.73099	2.68552	-0.646			-1.00247	0.0920144
gene-VNG_1815G|VNG_1815G|carA	VNG_1815G	VNG_RS07035	glutamine-hydrolyzingcarbamoyl -phosphatesynthasesmallsubunit	carA		1.34958	3.3734	-0.52			-0.785413	-1.19433
gene-VNG_1816G|VNG_1816G|VNG_1816G	VNG_1816G	VNG_RS07040	Lrp/AsnC family transcriptionalregulator	VNG_RS07040			1.26508					-1.44041
gene-VNG_1818a|VNG_1818a|jamm1	VNG_1818a	VNG_RS07050	M67 family metallopeptidase	VNG_RS07050		-2.25871					-2.23196
gene-VNG_1818G|VNG_1818G|idiA	VNG_1818G	VNG_RS07045	NUDIX domain -containing protein	VNG_RS07045		0.556671	0.912782				-0.144494	-0.167547
gene-VNG_1820H|VNG_1820H|VNG_1820H	VNG_1820H	VNG_RS07055	hypothetical protein	VNG_RS07055		0.506822	-0.715808				0.270543	0.996156
gene-VNG_1821G|VNG_1821G|qor1	VNG_1821G	VNG_RS07060	zinc-bindingdehydrogenase	VNG_RS07060		0.203146	0.433481		0.740971		-0.0920266	-0.0942385
gene-VNG_1822G|VNG_1822G|moaB	VNG_1822G	VNG_RS07065	molybdenumcofactorbiosynthesis protein MoaB	VNG_RS07065		1.82875	1.52812					0.489196
gene-VNG_1823C|VNG_1823C|VNG_1823C	VNG_1823C	VNG_RS07070	5-formyl tetrahydrofolatecyclo-ligase	VNG_RS07070		0.339712	0.599201				-0.00699048	-0.208428
gene-VNG_1826H|VNG_1826H|VNG_1826H	VNG_1826H	VNG_RS07075	hypothetical protein	VNG_RS07075
gene-VNG_1827H|VNG_1827H|VNG_1827H	VNG_1827H	VNG_RS07080	hypothetical protein	VNG_RS07080		1.84865	1.29679					0.325384
gene-VNG_1829G|VNG_1829G|guaAb	VNG_1829G	VNG_RS07085	glutamine-hydrolyzingGMPsynthasesubunitGuaA	guaA		0.660151	-0.0124505		-0.212568		0.768043	-0.0513719
gene-VNG_1830G|VNG_1830G|pyrG	VNG_1830G	VNG_RS07090	CTPsynthase	VNG_RS07090		1.0831	0.797892				0.415806	-0.0865304
gene-VNG_1831H|VNG_1831H|VNG_1831H	VNG_1831H	VNG_RS07095	hypothetical protein	VNG_RS07095		-3.24164	-1.88282				0.163628	-1.47838
gene-VNG_1832H|VNG_1832H|VNG_1832H	VNG_1832H
gene-VNG_1833C|VNG_1833C|VNG_1833C	VNG_1833C	VNG_RS07100	alpha/betahydrolase	VNG_RS07100
gene-VNG_1834G|VNG_1834G|VNG_1834G	VNG_1834G	VNG_RS07105	redoxin domain -containing protein	VNG_RS07105		-0.923322	-0.734916				-0.144494	0.000158415
gene-VNG_1835G|VNG_1835G|thrS	VNG_1835G	VNG_RS07110	threonine--tRNAligase	thrS		0.309877	0.0995237				0.577972	-0.323549
gene-VNG_1836G|VNG_1836G|cspA2	VNG_1836G	VNG_RS07115	cold-shock protein	VNG_RS07115		0.235175	0.866622				-0.477918	-0.109459
gene-VNG_1837G|VNG_1837G|VNG_1837G	VNG_1837G	VNG_RS07120	dipeptideepimerase	VNG_RS07120		-0.341174	-0.904841				0.855506	-0.247769
gene-VNG_1838H|VNG_1838H|VNG_1838H	VNG_1838H	VNG_RS07130	hypothetical protein	VNG_RS07130		-0.29678						0.533591
gene-VNG_1839H|VNG_1839H|VNG_1839H	VNG_1839H	VNG_RS07125	DUF1611 domain -containing protein	VNG_RS07125		-0.0669128	-0.850394				1.23402	-0.406467
gene-VNG_1842a|VNG_1842a|VNG_1842a	VNG_1842a	VNG_RS07140	hypothetical protein	VNG_RS07140		2.37307	-0.748722					2.08796
gene-VNG_1842H|VNG_1842H|VNG_1842H	VNG_1842H	VNG_RS07135	hypothetical protein	VNG_RS07135		2.67961	1.11308					1.56245
gene-VNG_1843C|VNG_1843C|VNG_1843C	VNG_1843C	VNG_RS07145	ArsR family transcriptionalregulator	VNG_RS07145		0.858498	0.232662				-0.144494	0.8144
gene-VNG_1844G|VNG_1844G|gatD	VNG_1844G	VNG_RS07150	Glu-tRNA(Gln)amido transferasesubunitGatD	gatD		0.413713	1.43348				-0.507064	-0.468634
gene-VNG_1845C|VNG_1845C|VNG_1845C	VNG_1845C	VNG_RS07155	GNAT family N-acetyl transferase	VNG_RS07155		0.197984	1.21324				-0.226956	-0.744234
gene-VNG_1846C|VNG_1846C|glpQ	VNG_1846C	VNG_RS07160	glycerophosphoryl diesterphosphodiesterase	VNG_RS07160		0.0131752	0.680121				-1.01896	0.396087
gene-VNG_1847G|VNG_1847G|pchA1	VNG_1847G	VNG_RS07170	NAD-binding protein	VNG_RS07170		-1.17125	0.505034				-1.24403	-0.388184
gene-VNG_1848H|VNG_1848H|samp1	VNG_1848H	VNG_RS07165	MoaD/ThiS family protein	VNG_RS07165		-0.0337459						0.533591
gene-VNG_1849H|VNG_1849H|VNG_1849H	VNG_1849H	VNG_RS07175	HPP family protein	VNG_RS07175		-0.711818	-0.28817				0.025431	-0.405009
gene-VNG_1850G|VNG_1850G|udp3	VNG_1850G	VNG_RS07180	nucleosidephosphoryl ase	VNG_RS07180		-1.0953	0.417087		-1.33025		-0.768985	-0.699332
gene-VNG_1851G|VNG_1851G|VNG_1851G	VNG_1851G	VNG_RS07185	carbohydratekinase family protein	VNG_RS07185		-1.17125					-2.46642	0.396087
gene-VNG_1852H|VNG_1852H|VNG_1852H	VNG_1852H	VNG_RS07190	DUF63 family protein	VNG_RS07190		1.28818						1.3112
gene-VNG_1853G|VNG_1853G|VNG_1853G	VNG_1853G	VNG_RS07195	ribose1,5-bisphosphateisomerase	VNG_RS07195		0.185444	0.380561				-0.502046	0.350999
gene-VNG_1856G|VNG_1856G|basT	VNG_1856G	VNG_RS07200	HAMP domain -containing protein	VNG_RS07200		-0.882969	-1.72957				0.781742	0.108924
gene-VNG_1857C|VNG_1857C|basB	VNG_1857C	VNG_RS07205	ABC transporter substrate-binding protein	VNG_RS07205		-1.46461	-1.76919				0.0394688	0.309179
gene-VNG_1859G|VNG_1859G|deoC	VNG_1859G	VNG_RS07210	deoxyribose-phosphatealdolase	deoC
gene-VNG_1861C|VNG_1861C|VNG_1861C	VNG_1861C	VNG_RS07215	tRNA(N(6)-L-threonyl carbamoyl adenosine(37)-C(2))-methyl thio transferase	VNG_RS07215		1.10487	0.0856671				0.201281	0.861997
gene-VNG_1862G|VNG_1862G|VNG_1862G	VNG_1862G	VNG_RS07220	cation transporter	VNG_RS07220		0.136873	0.626682				-0.0773798	-0.368359
gene-VNG_1864G|VNG_1864G|hit2	VNG_1864G	VNG_RS07225	HIT domain -containing protein	VNG_RS07225		-1.53382	0.296792				-0.729457	-1.05709
gene-VNG_1865H|VNG_1865H|VNG_1865H	VNG_1865H	VNG_RS07230	hypothetical protein	VNG_RS07230		1.37549	0.0539359				1.33283	0.0328
gene-VNG_1866G|VNG_1866G|map	VNG_1866G	VNG_RS07235	typeIImethionyl aminopeptidase	VNG_RS07235		-0.396809	-0.516276				0.0670101	0.0965268
gene-VNG_1867G|VNG_1867G|VNG_1867G	VNG_1867G	VNG_RS07240	ABC transporter permease	VNG_RS07240
gene-VNG_1868G|VNG_1868G|VNG_1868G	VNG_1868G	VNG_RS07245	ABC transporter permease	VNG_RS07245
gene-VNG_1869C|VNG_1869C|VNG_1869C	VNG_1869C	VNG_RS07250	extracellularsolute-binding protein	VNG_RS07250		2.35231	1.16555					-0.624671
gene-VNG_1871G|VNG_1871G|VNG_1871G	VNG_1871G	VNG_RS07255	ABC transporter ATP-binding protein	VNG_RS07255
gene-VNG_1872C|VNG_1872C|ansA	VNG_1872C	VNG_RS07260	isoaspartyl peptidase/L-asparaginase	VNG_RS07260
gene-VNG_1873G|VNG_1873G|icd	VNG_1873G	VNG_RS07265	NADP-dependentisocitratedehydrogenase	icd		-0.579577	0.668533				-0.338581	-0.865459
gene-VNG_1874C|VNG_1874C|VNG_1874C	VNG_1874C	VNG_RS07270	hypothetical protein	VNG_RS07270		1.17453	0.580585				-0.144494	0.782504
gene-VNG_1875G|VNG_1875G|hmgA	VNG_1875G	VNG_RS07275	hydroxymethyl glutaryl -CoAreductase(NADPH)	hmgA		-0.39866	0.344772				0.025431	-0.724793
gene-VNG_1877C|VNG_1877C|VNG_1877C	VNG_1877C	VNG_RS07280	MTH1187 family thiamine-binding protein	VNG_RS07280			-0.471882					-0.925841
gene-VNG_1879G|VNG_1879G|thiB2	VNG_1879G	VNG_RS07285	thiamineABC transporter substrate-binding protein	VNG_RS07285		-2.0526	-0.303005				-0.186314	-1.51922
gene-VNG_1880C|VNG_1880C|VNG_1880C	VNG_1880C	VNG_RS07290	amidohydrolase	VNG_RS07290		0.257594	0.0211579				-0.259971	0.540477
gene-VNG_1882G|VNG_1882G|nadA	VNG_1882G	VNG_RS07295	quinolinatesynthaseNadA	nadA		2.41371	1.81762					-0.215348
gene-VNG_1883G|VNG_1883G|nadB	VNG_1883G	VNG_RS07300	L-aspartateoxidase	VNG_RS07300		0.89914	0.680121					0.144548
gene-VNG_1884G|VNG_1884G|nadC	VNG_1884G	VNG_RS07305	carboxyl atingnicotinate-nucleotidediphosphoryl ase	nadC
gene-VNG_1886a|VNG_1886a|VNG_1886a	VNG_1886a	VNG_RS07315	multidrug efflux SMR transporter protein HsmR	hsmR
gene-VNG_1886C|VNG_1886C|VNG_1886C	VNG_1886C	VNG_RS07310	TrmB family transcriptionalregulator	VNG_RS07310		2.15068	1.40259					-2.06334
gene-VNG_1887G|VNG_1887G|gpmI	VNG_1887G	VNG_RS07320	2,3-bisphosphoglycerate-independentphosphoglyceratemutase	VNG_RS07320		1.39722	0.621227				0.525357	0.29471
gene-VNG_1889H|VNG_1889H|VNG_1889H	VNG_1889H	VNG_RS07325	hypothetical protein	VNG_RS07325		0.00277998	0.602119				-0.181969	-0.3733
gene-VNG_1890a|VNG_1890a|VNG_1890a	VNG_1890a
gene-VNG_1890H|VNG_1890H|VNG_1890H	VNG_1890H	VNG_RS13360	hypothetical protein	VNG_RS13360		-2.24925	-2.00438				-0.222497
gene-VNG_1891H|VNG_1891H|VNG_1891H	VNG_1891H	VNG_RS07335	DNAdouble-strandbreak repairnucleaseNurA	VNG_RS07335		0.091785	0.165548					-0.563271
gene-VNG_1893G|VNG_1893G|VNG_1893G	VNG_1893G	VNG_RS07340	ABC transporter ATP-binding protein	VNG_RS07340		-0.586287	-1.27924				0.340933	0.396087
gene-VNG_1894C|VNG_1894C|VNG_1894C	VNG_1894C	VNG_RS07345	hypothetical protein	VNG_RS07345		-2.87169	-0.834452				0.155066	-2.14823
gene-VNG_1895H|VNG_1895H|VNG_1895H	VNG_1895H	VNG_RS07350	hypothetical protein	VNG_RS07350		-0.871689	-0.263295				-0.523006	-0.0413182
gene-VNG_1896C|VNG_1896C|VNG_1896C	VNG_1896C	VNG_RS07355	ATP-binding protein	VNG_RS07355		-1.54322	-1.04141				0.350271	-0.808005
gene-VNG_1898C|VNG_1898C|VNG_1898C	VNG_1898C	VNG_RS07360	universalstress protein	VNG_RS07360		-1.53831	-0.339917				-0.395037	-0.759283
gene-VNG_1899G|VNG_1899G|VNG_1899G	VNG_1899G	VNG_RS07365	KaiC domain-containing protein	VNG_RS07365		-0.199819	-0.743252				0.522931	0.0645729
gene-VNG_1900C|VNG_1900C|nadK1	VNG_1900C	VNG_RS07370	NAD(+)/NADHkinase	VNG_RS07370		-2.39364	-1.732				0.0925452	-0.710112
gene-VNG_1901C|VNG_1901C|mptA	VNG_1901C	VNG_RS07375	GTPcyclohydrolaseIFolE2	VNG_RS07375		1.92045	0.763177				0.288465	0.912878
gene-VNG_1902H|VNG_1902H|VNG_1902H	VNG_1902H	VNG_RS07380	DUF4870 domain-containing protein	VNG_RS07380
gene-VNG_1903C|VNG_1903C|VNG_1903C	VNG_1903C	VNG_RS07385	TrmB family transcriptionalregulator	VNG_RS07385		1.83774	-0.615335				1.28847	1.20868
gene-VNG_1904H|VNG_1904H|VNG_1904H	VNG_1904H					-0.264359	-0.904841					0.244084
gene-VNG_1905C|VNG_1905C|VNG_1905C	VNG_1905C	VNG_RS07390	thioredoxin domain -containing protein	VNG_RS07390		0.305189	1.98268				-2.08309	0.449668
gene-VNG_1906H|VNG_1906H|fxsA	VNG_1906H	VNG_RS07395	membrane protein FxsA	fxsA		0.70322	0.358193				0.0778984	0.311198
gene-VNG_1907a|VNG_1907a|VNG_1907a	VNG_1907a					0.150679						0.98105
gene-VNG_1907b|VNG_1907b|VNG_1907b	VNG_1907b	VNG_RS07410	hypothetical protein	VNG_RS07410		-0.434284	-0.715808				0.270543	0.0550502
gene-VNG_1907H|VNG_1907H|VNG_1907H	VNG_1907H	VNG_RS07405	hypothetical protein	VNG_RS07405		1.43756	1.68012				0.11854	-0.317032
gene-VNG_1910H|VNG_1910H|VNG_1910H	VNG_1910H	VNG_RS07415	hypothetical protein	VNG_RS07415		0.0657898	1.29679				-1.36689	0.179954
gene-VNG_1911G|VNG_1911G|ahbA	VNG_1911G	VNG_RS07420	Lrp/AsnC family transcriptionalregulator	VNG_RS07420		-0.665064	0.218015				-0.498131	-0.340879
gene-VNG_1912G|VNG_1912G|trpD2	VNG_1912G	VNG_RS07425	anthranilatephosphoribosyl transferase	VNG_RS07425		0.416734	0.336031				-0.099825	0.224598
gene-VNG_1914G|VNG_1914G|ppiA	VNG_1914G	VNG_RS07430	peptidyl prolyl isomerase	VNG_RS07430		-0.0575926	-0.22677				-0.0308372	0.244084
gene-VNG_1916H|VNG_1916H|VNG_1916H	VNG_1916H	VNG_RS07435	hypothetical protein	VNG_RS07435		-0.23137	-0.284255				0.240796	-0.143842
gene-VNG_1917H|VNG_1917H|VNG_1917H	VNG_1917H	VNG_RS07445	nuclear transportfactor2 family protein	VNG_RS07445		-0.47081	1.35819					-0.640439
gene-VNG_1918C|VNG_1918C|pcrB2	VNG_1918C	VNG_RS07450	heptaprenyl glyceryl phosphatesynthase	VNG_RS07450		1.49172	-0.263295					0.206609
gene-VNG_1919H|VNG_1919H|crcB1	VNG_1919H	VNG_RS07455	CrcB family protein	VNG_RS07455
gene-VNG_1920H|VNG_1920H|VNG_1920H	VNG_1920H	VNG_RS07465	hypothetical protein	VNG_RS07465		0.091785	1.05863					-0.456356
gene-VNG_1921H|VNG_1921H|crcB2	VNG_1921H	VNG_RS07460	CrcB family protein	VNG_RS07460
gene-VNG_1922G|VNG_1922G|VNG_1922G	VNG_1922G	VNG_RS07470	Lrp/AsnCligandbinding domain -containing protein	VNG_RS07470		-0.163344	-1.52251				1.20569	0.197541
gene-VNG_1924G|VNG_1924G|trkA6	VNG_1924G	VNG_RS07475	TrkA family potassiumuptake protein	VNG_RS07475		0.0660547	-1.02912	1.006			1.05143	0.0878222
gene-VNG_1925H|VNG_1925H|VNG_1925H	VNG_1925H	VNG_RS07480	Lrp/AsnCligandbinding domain -containing protein	VNG_RS07480		2.49323	0.634317				1.21165	0.691336
gene-VNG_1926G|VNG_1926G|oxdhA2	VNG_1926G	VNG_RS07485	2-oxoaciddehydrogenase	VNG_RS07485		-0.171249	1.29108		0.289244		-0.111327	-1.30693
gene-VNG_1927H|VNG_1927H|VNG_1927H	VNG_1927H	VNG_RS07490	hypothetical protein	VNG_RS07490		2.35231	1.63121					0.324702
gene-VNG_1929G|VNG_1929G|tmk	VNG_1929G	VNG_RS07495	dTMPkinase	VNG_RS07495			1.09516					-1.85545
gene-VNG_1932G|VNG_1932G|nolA	VNG_1932G	VNG_RS07500	complexINDUFA9subunit family protein	VNG_RS07500		-0.306905	-0.259337				-0.207504	0.204007
gene-VNG_1933G|VNG_1933G|cetZ1	VNG_1933G	VNG_RS07505	celldivision protein	VNG_RS07505		-0.32749	-0.521832				0.524027	-0.285614
gene-VNG_1934H|VNG_1934H|VNG_1934H	VNG_1934H	VNG_RS07510	hypothetical protein	VNG_RS07510		0.53019	-0.317969		-0.473931		1.29949	-0.407266
gene-VNG_1935C|VNG_1935C|cofC	VNG_1935C	VNG_RS07515	2-phospho-L-lactateguanyl yl transferase	cofC		0.323515	0.358193				0.203429	-0.194037
gene-VNG_1937C|VNG_1937C|cofG	VNG_1937C	VNG_RS07520	7,8-didemethyl -8-hydroxy-5-deazariboflavinsynthasesubunitCofG	cofG		0.118257	0.232662					-0.340879
gene-VNG_1938C|VNG_1938C|cofH	VNG_1938C	VNG_RS07525	7,8-didemethyl -8-hydroxy-5-deazariboflavinsynthasesubunitCofH	cofH		-1.25371	-0.834452				-0.314419	-0.0607706
gene-VNG_1939G|VNG_1939G|purC	VNG_1939G	VNG_RS07530	phosphoribosyl aminoimidazolesuccinocarboxamidesynthase	VNG_RS07530		-1.53738	-1.73802				-0.0482787	0.292994
gene-VNG_1940H|VNG_1940H|VNG_1940H	VNG_1940H	VNG_RS07535	hypothetical protein	VNG_RS07535
gene-VNG_1941C|VNG_1941C|VNG_1941C	VNG_1941C	VNG_RS07540	archaeosinebiosynthesisradicalSAM protein RaSEA	VNG_RS07540		1.01943	0.680121				0.238835	0.144548
gene-VNG_1942H|VNG_1942H|VNG_1942H	VNG_1942H	VNG_RS07545	hypothetical protein	VNG_RS07545		-1.65238	-1.30431				0.215682	-0.519682
gene-VNG_1943H|VNG_1943H|VNG_1943H	VNG_1943H	VNG_RS14235	hypothetical protein	VNG_RS14235		-1.42279	-1.22677				-0.618425	0.466476
gene-VNG_1944C|VNG_1944C|purS	VNG_1944C	VNG_RS07555	phosphoribosyl formyl glycinamidinesynthasesubunitPurS	purS		-0.647687	-0.734916				-0.144494	0.275793
gene-VNG_1945G|VNG_1945G|purQ	VNG_1945G	VNG_RS07550	phosphoribosyl formyl glycinamidinesynthaseI	purQ		-0.685823	-0.419415				-0.88146	0.659121
gene-VNG_1946G|VNG_1946G|purU	VNG_1946G	VNG_RS07560	ACT domain -containing protein	VNG_RS07560		0.636106	-0.904841				0.440468	1.14455
gene-VNG_1948H|VNG_1948H|VNG_1948H	VNG_1948H	VNG_RS07565	hypothetical protein	VNG_RS07565		-0.220159	-0.641807				-0.24403	0.709748
gene-VNG_1949G|VNG_1949G|VNG_1949G	VNG_1949G	VNG_RS07570	CBS domain -containing protein	VNG_RS07570		0.241011	-0.0568446				0.259403	0.0825225
gene-VNG_1951G|VNG_1951G|VNG_1951G	VNG_1951G	VNG_RS07575	S8 family serinepeptidase	VNG_RS07575		-0.264359	-1.13931				1.44047	-0.521451
gene-VNG_1952H|VNG_1952H|VNG_1952H	VNG_1952H	VNG_RS07580	hypothetical protein	VNG_RS07580		-0.253712	-1.84826				1.59247	0.0461446
gene-VNG_1953C|VNG_1953C|VNG_1953C	VNG_1953C	VNG_RS07585	surfaceglyco protein	VNG_RS07585		-2.2257	-2.83736				2.25037	-1.59464
gene-VNG_1954H|VNG_1954H|VNG_1954H	VNG_1954H	VNG_RS07590	hypothetical protein	VNG_RS07590			-0.319879					-1.66281
gene-VNG_1956a|VNG_1956a|VNG_1956a	VNG_1956a
gene-VNG_1956H|VNG_1956H|VNG_1956H	VNG_1956H	VNG_RS13365	hypothetical protein	VNG_RS13365
gene-VNG_1957G|VNG_1957G|arcS	VNG_1957G	VNG_RS07600	DUF5591 domain -containing protein	VNG_RS07600		0.516807	0.358193				0.145013	0.0576709
gene-VNG_1959G|VNG_1959G|tgtA	VNG_1959G	VNG_RS07605	tRNAguanosine(15) transglycosyl aseTgtA	tgtA		1.08862	0.624979				0.607578	-0.0998704
gene-VNG_1960H|VNG_1960H|VNG_1960H	VNG_1960H	VNG_RS14240	hypothetical protein	VNG_RS14240		0.0303844	-0.0568446				-0.144494	0.275793
gene-VNG_1962C|VNG_1962C|VNG_1962C	VNG_1962C	VNG_RS07610	NUDIXhydrolase	VNG_RS07610		0.0417443	-0.361699				0.203429	0.244084
gene-VNG_1963a|VNG_1963a|VNG_1963a	VNG_1963a					-1.64073	0.47367				-0.144494	-1.92584
gene-VNG_1963H|VNG_1963H|VNG_1963H	VNG_1963H	VNG_RS07615	AAA family ATPase	VNG_RS07615
gene-VNG_1964H|VNG_1964H|orc14	VNG_1964H	VNG_RS07620	ATP-binding protein	VNG_RS07620		-1.36389	-0.0974866				-0.144494	-1.07784
gene-VNG_1965H|VNG_1965H|VNG_1965H	VNG_1965H	VNG_RS07625	hypothetical protein	VNG_RS07625		-0.978604	0.0830857				0.410721	-1.42834
gene-VNG_1967G|VNG_1967G|glpK	VNG_1967G	VNG_RS07630	glycerolkinaseGlpK	glpK		-0.770711	0.392463		0.678252		-0.0879105	-1.03119
gene-VNG_1969G|VNG_1969G|glpA1	VNG_1969G	VNG_RS07635	anaerobicglycerol-3-phosphatedehydrogenasesubunitA	glpA		2.776	2.88623		0.945008		-0.891728	0.825568
gene-VNG_1971G|VNG_1971G|glpB	VNG_1971G	VNG_RS07640	glycerol-3-phosphatedehydrogenasesubunitGlpB	glpB		3.07083	1.86599				0.155066	1.09384
gene-VNG_1972G|VNG_1972G|glpC	VNG_1972G	VNG_RS07645	anaerobicglycerol-3-phosphatedehydrogenasesubunitC	VNG_RS07645		3.34248	1.78924				0.662861	0.934444
gene-VNG_1973H|VNG_1973H|VNG_1973H	VNG_1973H	VNG_RS07650	hypothetical protein	VNG_RS07650		-2.60565	-4.8996				1.99301	0.345013
gene-VNG_1974H|VNG_1974H|VNG_1974H	VNG_1974H	VNG_RS07655	typeIVpilin	VNG_RS07655		0.506822	0.680121				-0.466422	0.337193
gene-VNG_1976H|VNG_1976H|VNG_1976H	VNG_1976H	VNG_RS07660	hypothetical protein	VNG_RS07660
gene-VNG_1977H|VNG_1977H|VNG_1977H	VNG_1977H	VNG_RS13370	ATP-binding protein	VNG_RS13370		-2.84932	-2.51628				0.314938	-0.603913
gene-VNG_1978H|VNG_1978H|VNG_1978H	VNG_1978H	VNG_RS13375	hypothetical protein	VNG_RS13375			-1.47188					-0.925841
gene-VNG_1980C|VNG_1980C|trmY	VNG_1980C	VNG_RS07670	tRNA(pseudouridine(54)-N(1))-methyl transferaseTrmY	trmY		3.47261	1.88175					0.779416
gene-VNG_1982C|VNG_1982C|pus10	VNG_1982C	VNG_RS07680	tRNApseudouridine(54/55)synthasePus10	VNG_RS07680		-0.341174	0.943155					-0.510804
gene-VNG_1983a|VNG_1983a|VNG_1983a	VNG_1983a
gene-VNG_1983H|VNG_1983H|VNG_1983H	VNG_1983H	VNG_RS07675	hypothetical protein	VNG_RS07675
gene-VNG_1984G|VNG_1984G|rnhB	VNG_1984G	VNG_RS07685	ribonucleaseHII	VNG_RS07685			0.0362648					-1.17095
gene-VNG_1985C|VNG_1985C|nhaC3	VNG_1985C	VNG_RS07690	Na+/H+antiporterNhaC family protein	VNG_RS07690		-2.06162	-1.53287				0.280004	-0.764686
gene-VNG_1986C|VNG_1986C|nucS2	VNG_1986C	VNG_RS07695	endonuclease NucS	nucS
gene-VNG_1987G|VNG_1987G|secD	VNG_1987G	VNG_RS07700	pre protein translocasesubunitSecD	VNG_RS07700		0.473948	0.907086		0.329755		0.184129	-0.573197
gene-VNG_1988G|VNG_1988G|secF	VNG_1988G	VNG_RS07705	protein translocasesubunitSecF	VNG_RS07705		0.619297	0.812369				0.289909	-0.438911
gene-VNG_1989H|VNG_1989H|VNG_1989H	VNG_1989H	VNG_RS07710	hypothetical protein	VNG_RS07710		0.520628	0.943155				-0.523006	0.144548
gene-VNG_1991H|VNG_1991H|VNG_1991H	VNG_1991H	VNG_RS07715	hypothetical protein	VNG_RS07715
gene-VNG_1992G|VNG_1992G|pgi	VNG_1992G	VNG_RS07720	glucose-6-phosphateisomerase	VNG_RS07720		-2.17125					-2.72946
gene-VNG_1993H|VNG_1993H|VNG_1993H	VNG_1993H	VNG_RS07725	CPBP family intramembranemetalloprotease	VNG_RS07725		0.091785	-0.79381					0.074159
gene-VNG_1994C|VNG_1994C|nob1	VNG_1994C	VNG_RS07730	NOB1 family endonuclease	VNG_RS07730		-2.72584	-0.822379				-0.61162	-1.24777
gene-VNG_1995C|VNG_1995C|VNG_1995C	VNG_1995C	VNG_RS07735	PRC-barrel domain -containing protein	VNG_RS07735		-2.90822					-0.144494
gene-VNG_1997G|VNG_1997G|tif5B	VNG_1997G	VNG_RS07740	translationinitiationfactorIF-2	infB		0.386363	0.550838				-0.164958	0.0445525
gene-VNG_1998H|VNG_1998H|VNG_1998H	VNG_1998H	VNG_RS07745	hypothetical protein	VNG_RS07745		0.765185	1.45505				-0.83255	0.186751
gene-VNG_1999H|VNG_1999H|pdaD	VNG_1999H	VNG_RS07750	pyruvoyl -dependentargininedecarboxyl ase	VNG_RS07750		0.624392	0.37149				-0.117527	0.414499
gene-VNG_2000G|VNG_2000G|pan1	VNG_2000G	VNG_RS07755	proteasome-activatingnucleotidase	VNG_RS07755		0.2636	0.395282		-0.445558		-0.37971	0.292098
gene-VNG_2001G|VNG_2001G|pepF	VNG_2001G	VNG_RS07760	oligoendopeptidaseF	pepF		-0.380703	-0.244917				0.289909	-0.381625
gene-VNG_2002H|VNG_2002H|ywaD2	VNG_2002H	VNG_RS07765	M28 family peptidase	VNG_RS07765		-2.17125					-0.337139
gene-VNG_2003G|VNG_2003G|truA	VNG_2003G	VNG_RS07770	tRNApseudouridine(38-40)synthaseTruA	truA		-0.586287	0.505034				0.0778984	-1.12515
gene-VNG_2005G|VNG_2005G|hisS	VNG_2005G	VNG_RS07775	histidine--tRNAligase	VNG_RS07775		-0.638375	-0.61756				0.18356	-0.160306
gene-VNG_2006C|VNG_2006C|VNG_2006C	VNG_2006C	VNG_RS07780	alphahydrolase	VNG_RS07780		-0.612282	-1.20571				0.135614	0.501882
gene-VNG_2008H|VNG_2008H|VNG_2008H	VNG_2008H	VNG_RS07785	DNA-binding protein	VNG_RS07785		-0.797632	-1.17786				0.400604	0.0236939
gene-VNG_2010G|VNG_2010G|rps19e	VNG_2010G	VNG_RS07790	30Sribosomal protein S19e	VNG_RS07790		0.340251	1.67135		-0.504919		-0.654689	-0.632341
gene-VNG_2011G|VNG_2011G|thiL	VNG_2011G	VNG_RS07795	thiamine-phosphatekinase	thiL		-0.112356						-0.281985
gene-VNG_2012C|VNG_2012C|VNG_2012C	VNG_2012C	VNG_RS07800	site-2protease family protein	VNG_RS07800		1.06822	0.149606				0.386021	0.576659
gene-VNG_2014a|VNG_2014a|VNG_2014a	VNG_2014a
gene-VNG_2014H|VNG_2014H|VNG_2014H	VNG_2014H	VNG_RS07805	hypothetical protein	VNG_RS07805		0.091785	1.43911				0.649055	-1.95231
gene-VNG_2015C|VNG_2015C|pyrH	VNG_2015C	VNG_RS07810	UMPkinase	VNG_RS07810		1.01318	3.28893				-1.60393	-0.62776
gene-VNG_2017G|VNG_2017G|lysS	VNG_2017G	VNG_RS07815	lysine--tRNAligase	VNG_RS07815		1.29364	0.796766				0.518471	0.0224695
gene-VNG_2019C|VNG_2019C|VNG_2019C	VNG_2019C	VNG_RS07820	site-2protease family protein	VNG_RS07820		0.437961	-0.256517				0.587573	0.150975
gene-VNG_2020C|VNG_2020C|VNG_2020C	VNG_2020C	VNG_RS07825	helix-turn-helix transcriptionalregulator	VNG_RS07825		-0.784226	2.58059				-1.25997	-2.06077
gene-VNG_2021a|VNG_2021a|VNG_2021a	VNG_2021a					1.77628	2.21617					0.556028
gene-VNG_2021C|VNG_2021C|hemQ	VNG_2021C	VNG_RS07830	heme-binding protein	VNG_RS07830		-0.247553	0.528118		0.435095		-0.0513846	-0.680216
gene-VNG_2023G|VNG_2023G|VNG_2023G	VNG_2023G	VNG_RS07835	aldo/ketoreductase	VNG_RS07835		0.882983	1.44566				-1.01123	0.492624
gene-VNG_2024H|VNG_2024H|VNG_2024H	VNG_2024H	VNG_RS13995	hypothetical protein
gene-VNG_2025G|VNG_2025G|VNG_2025G	VNG_2025G	VNG_RS07840	acyl transferase	VNG_RS07840		-0.333	-0.404768				-0.381533	0.49737
gene-VNG_2027H|VNG_2027H|VNG_2027H	VNG_2027H	VNG_RS07845	zinc ribbon domain-containing protein	VNG_RS07845		0.506822	-2.8642				2.9259	0.489196
gene-VNG_2028H|VNG_2028H|VNG_2028H	VNG_2028H	VNG_RS07850	hypothetical protein	VNG_RS07850		-0.533819	-2.13657				1.05481	0.592007
gene-VNG_2029H|VNG_2029H|VNG_2029H	VNG_2029H	VNG_RS07855	hypothetical protein	VNG_RS07855
gene-VNG_2031G|VNG_2031G|nadE	VNG_2031G	VNG_RS07865	NAD+synthase	VNG_RS07865		0.636106	-0.408317				0.110763	0.977729
gene-VNG_2032G|VNG_2032G|fadA1	VNG_2032G	VNG_RS07870	enoyl-CoA hydratase/isomerase family protein	VNG_RS07870		1.15068						0.396087
gene-VNG_2034a|VNG_2034a|VNG_2034a	VNG_2034a					-0.727643	0.265084				-0.78835	-0.160306
gene-VNG_2034H|VNG_2034H|VNG_2034H	VNG_2034H	VNG_RS07875	hypothetical protein	VNG_RS07875
gene-VNG_2035H|VNG_2035H|VNG_2035H	VNG_2035H	VNG_RS07885	hypothetical protein	VNG_RS07885		-0.586287	-0.0568446				-0.559532	0.074159
gene-VNG_2036G|VNG_2036G|VNG_2036G	VNG_2036G	VNG_RS07890	responseregulator	VNG_RS07890		0.304484	0.321667				0.177434	-0.150547
gene-VNG_2037C|VNG_2037C|VNG_2037C	VNG_2037C	VNG_RS07895	PAS domain S-box protein	VNG_RS07895		0.424768	0.380287				0.172988	-0.0844368
gene-VNG_2039H|VNG_2039H|VNG_2039H	VNG_2039H	VNG_RS07900	hypothetical protein	VNG_RS07900		-0.586287	-0.641807				0.218076	-0.118486
gene-VNG_2041a|VNG_2041a|VNG_2041a	VNG_2041a
gene-VNG_2041H|VNG_2041H|VNG_2041H	VNG_2041H	VNG_RS07905	hypothetical protein	VNG_RS07905
gene-VNG_2042H|VNG_2042H|VNG_2042H	VNG_2042H	VNG_RS07905	hypothetical protein	VNG_RS07905		0.091785	-0.0568446				-0.144494	0.337193
gene-VNG_2043G|VNG_2043G|ham1	VNG_2043G	VNG_RS07910	RdgB/HAM1 family non-canonicalpurineNTPpyrophosphatase	rdgB		1.07668	1.20619				-0.629921	0.544479
gene-VNG_2044H|VNG_2044H|VNG_2044H	VNG_2044H	VNG_RS07915	hypothetical protein	VNG_RS07915		0.110321	0.315965				-0.302035	0.140461
gene-VNG_2045G|VNG_2045G|kae1	VNG_2045G	VNG_RS07920	bifunctionalN(6)-L-threonyl carbamoyl adeninesynthase/serine/threonine protein kinase	VNG_RS07920		-0.134413	1.54981				-0.543043	-1.09711
gene-VNG_2047G|VNG_2047G|rps31e	VNG_2047G	VNG_RS07925	30Sribosomal protein S27ae	VNG_RS07925		-0.549761	-0.0568446				-0.0375788	-0.411268
gene-VNG_2048G|VNG_2048G|rps24e	VNG_2048G	VNG_RS07930	30Sribosomal protein S24e	rps24e		0.116327	0.492049		-0.218095		-0.0620318	-0.26962
gene-VNG_2049C|VNG_2049C|VNG_2049C	VNG_2049C	VNG_RS07935	DUF359 domain-containing protein	VNG_RS07935		-0.291544	1.28419				-1.46642	-0.0652441
gene-VNG_2051G|VNG_2051G|spt4	VNG_2051G	VNG_RS07940	DNA-directedRNApolymerasesubunitE''	VNG_RS07940		0.70322	-0.0568446				0.729975	0.074159
gene-VNG_2053G|VNG_2053G|rpoE1	VNG_2053G	VNG_RS07945	DNA-directedRNApolymerase	VNG_RS07945		-0.623762	-0.246947				0.324991	-0.657736
gene-VNG_2054H|VNG_2054H|VNG_2054H	VNG_2054H	VNG_RS07950	hypothetical protein	VNG_RS07950		-1.40257	-0.16376				-0.0920266	-1.10272
gene-VNG_2056G|VNG_2056G|tif2c	VNG_2056G	VNG_RS07955	translationinitiationfactorIF-2subunitgamma	VNG_RS07955		-1.10941	-0.0744386				-0.461166	-0.529735
gene-VNG_2059H|VNG_2059H|VNG_2059H	VNG_2059H	VNG_RS07960	hypothetical protein	VNG_RS07960		-0.451357	1.16555				-0.910029	-0.662807
gene-VNG_2060G|VNG_2060G|VNG_2060G	VNG_2060G	VNG_RS07965	MBLfoldmetallo-hydrolase	VNG_RS07965		-0.0760922	1.08611				-0.603926	-0.51421
gene-VNG_2062G|VNG_2062G|aaa7	VNG_2062G	VNG_RS07970	ATP-binding protein	VNG_RS07970		-0.441339	0.688342				-0.372763	-0.712847
gene-VNG_2063G|VNG_2063G|acaB3	VNG_2063G	VNG_RS07980	thiolase family protein	VNG_RS07980		-0.770711	-0.821356				0.766239	-0.671524
gene-VNG_2064H|VNG_2064H|VNG_2064H	VNG_2064H	VNG_RS07975	TIGR03663 family protein	VNG_RS07975		-0.730677	1.71574				-0.951849	-1.4505
gene-VNG_2065G|VNG_2065G|gtl3	VNG_2065G	VNG_RS07985	glycosyl transferase	VNG_RS07985		-0.419177	-0.0228972				0.414933	-0.767143
gene-VNG_2067H|VNG_2067H|VNG_2067H	VNG_2067H	VNG_RS07990	GtrA family protein	VNG_RS07990			-0.182375					-0.992955
gene-VNG_2068C|VNG_2068C|kef1	VNG_2068C	VNG_RS07995	cation:protonantiporter	VNG_RS07995		-0.845021	-0.09161				0.181734	-0.891076
gene-VNG_2071G|VNG_2071G|acs5	VNG_2071G	VNG_RS08000	long-chainfattyacid--CoAligase	VNG_RS08000		-0.171249	-0.800505				0.740029	-0.0667035
gene-VNG_2072G|VNG_2072G|serS	VNG_2072G	VNG_RS08010	serine--tRNAligase	serS		0.436433	0.760291				-0.144494	-0.135294
gene-VNG_2073C|VNG_2073C|VNG_2073C	VNG_2073C	VNG_RS08005	MBLfoldmetallo-hydrolase	VNG_RS08005		-1.32325	-1.2633				0.270543	-0.286431
gene-VNG_2074H|VNG_2074H|VNG_2074H	VNG_2074H	VNG_RS08015	nuclear transportfactor2 family protein	VNG_RS08015			0.232662					-0.992955
gene-VNG_2075C|VNG_2075C|VNG_2075C	VNG_2075C	VNG_RS08020	DUF367 family protein	VNG_RS08020
gene-VNG_2076G|VNG_2076G|rpl40e	VNG_2076G	VNG_RS08025	50Sribosomal protein L40e	VNG_RS08025					-0.956796
gene-VNG_2078G|VNG_2078G|VNG_2078G	VNG_2078G	VNG_RS08035	GNAT family N-acetyl transferase	VNG_RS08035
gene-VNG_2079G|VNG_2079G|VNG_2079G	VNG_2079G	VNG_RS08030	NUDIX domain -containing protein	VNG_RS08030
gene-VNG_2080C|VNG_2080C|VNG_2080C	VNG_2080C	VNG_RS08040	MBLfoldmetallo-hydrolase	VNG_RS08040		1.99868	0.77323					-0.170954
gene-VNG_2081a|VNG_2081a|VNG_2081a	VNG_2081a	VNG_RS08050	DUF99 family protein	VNG_RS08050		-0.345928	-1.4758				0.380168	0.793771
gene-VNG_2081H|VNG_2081H|VNG_2081H	VNG_2081H	VNG_RS08045	hypothetical protein	VNG_RS08045		-0.940412	-1.54295				0.22027	0.426341
gene-VNG_2082G|VNG_2082G|udg	VNG_2082G	VNG_RS08055	uracil-DNAglycosyl ase	VNG_RS08055		-0.10086	-0.734916				0.533578	0.144548
gene-VNG_2084G|VNG_2084G|phnE	VNG_2084G	VNG_RS08060	phosphonateABC transporter ,permease protein PhnE	phnE		-0.756212	-0.519817				1.03608	-1.2284
gene-VNG_2085G|VNG_2085G|phnC	VNG_2085G	VNG_RS08065	phosphonateABC transporter ATP-binding protein	VNG_RS08065		-0.971941	1.48158				-1.09203	-1.31742
gene-VNG_2086G|VNG_2086G|phnD	VNG_2086G	VNG_RS08070	phosphate/phosphite/phosphonateABC transporter substrate-binding protein	VNG_RS08070		-2.07171	-0.598738		-0.817308		0.0925452	-1.52145
gene-VNG_2087a|VNG_2087a|VNG_2087a	VNG_2087a	VNG_RS08080	hypothetical protein	VNG_RS08080		0.582732	0.821593				0.0172571	-0.212049
gene-VNG_2087G|VNG_2087G|hisH	VNG_2087G	VNG_RS08075	imidazoleglycerolphosphatesynthasesubunitHisH	hisH		0.864374	2.68012				-2.46642	0.694745
gene-VNG_2088G|VNG_2088G|trm1	VNG_2088G	VNG_RS08085	tRNA(guanine(26)-N(2))-dimethyl transferase	VNG_RS08085			1.26508					-1.07784
gene-VNG_2089H|VNG_2089H|VNG_2089H	VNG_2089H	VNG_RS08090	hypothetical protein	VNG_RS08090		0.243788	0.265084				0.533578	-0.510804
gene-VNG_2091H|VNG_2091H|VNG_2091H	VNG_2091H	VNG_RS08095	phosphatasePAP2 family protein	VNG_RS08095		-0.0557722	1.16555				-0.144494	-1.03276
gene-VNG_2093G|VNG_2093G|glnA	VNG_2093G	VNG_RS08100	typeIglutamate--ammonialigase	glnA		-1.24483	0.695228	-0.766			-0.396412	-1.49958
gene-VNG_2094G|VNG_2094G|lrp	VNG_2094G	VNG_RS08105	Lrp/AsnC family transcriptionalregulator	VNG_RS08105		-1.6631	0.0327926				0.0640926	-1.71592
gene-VNG_2096G|VNG_2096G|ths2	VNG_2096G	VNG_RS08110	thermosomesubunit	VNG_RS08110		0.267707	0.782067		0.442439		0.113171	-0.583462
gene-VNG_2097C|VNG_2097C|VNG_2097C	VNG_2097C	VNG_RS08115	DUF418 domain -containing protein	VNG_RS08115		-0.266827	-0.575718				0.570104	-0.217143
gene-VNG_2098H|VNG_2098H|VNG_2098H	VNG_2098H	VNG_RS08125	hypothetical protein	VNG_RS08125		0.413713	0.0102696					-0.407993
gene-VNG_2099C|VNG_2099C|ridA	VNG_2099C	VNG_RS08130	reactiveintermediate/iminedeaminase	VNG_RS08130		-0.0990996	0.583368				-0.220443	-0.417955
gene-VNG_2100G|VNG_2100G|ilvA	VNG_2100G	VNG_RS08135	threonineammonia-lyase	ilvA		-0.163514	-0.614326				0.0167869	0.478096
gene-VNG_2101H|VNG_2101H|VNG_2101H	VNG_2101H	VNG_RS08140	hypothetical protein	VNG_RS08140		-0.792738	2.88175				-2.46642	-1.164
gene-VNG_2102G|VNG_2102G|citZ	VNG_2102G	VNG_RS08145	citrate(Si)-synthase	VNG_RS08145		-2.11878	-2.01378		-0.650182		-0.0249124	-0.0360239
gene-VNG_2104G|VNG_2104G|pchB	VNG_2104G	VNG_RS08150	potassiumchannel family protein	VNG_RS08150		-0.792738	-0.824223				0.432201	-0.356646
gene-VNG_2105H|VNG_2105H|VNG_2105H	VNG_2105H	VNG_RS08155	hypothetical protein	VNG_RS08155		-0.558273	0.184164				0.227475	-0.925841
gene-VNG_2106G|VNG_2106G|VNG_2106G	VNG_2106G	VNG_RS08160	succinyl glutamatedesuccinyl ase/aspartoacyl ase family protein	VNG_RS08160		-0.109849	0.680121				0.238835	-0.984735
gene-VNG_2108G|VNG_2108G|thrC3	VNG_2108G	VNG_RS08165	threoninesynthase	VNG_RS08165		0.735641	0.680121					0.244084
gene-VNG_2109H|VNG_2109H|VNG_2109H	VNG_2109H	VNG_RS08170	hypothetical protein	VNG_RS08170		-2.39364	-2.5929				0.32117	-0.0778441
gene-VNG_2110C|VNG_2110C|tiaS	VNG_2110C	VNG_RS08175	DUF1743 domain -containing protein	VNG_RS08175		-0.145714	1.27876				-1.14449	-0.235909
gene-VNG_2112C|VNG_2112C|VNG_2112C	VNG_2112C	VNG_RS08180	transcriptionalregulator	VNG_RS08180		-0.701764	-0.641807				-0.0375788	0.0216916
gene-VNG_2113C|VNG_2113C|mscS3	VNG_2113C	VNG_RS08185	mechanosensitiveionchannel family protein	VNG_RS08185		0.781753	0.209049				0.377459	0.239315
gene-VNG_2115H|VNG_2115H|grx1	VNG_2115H	VNG_RS08190	glutathioneS- transferaseN-terminal domain -containing protein	VNG_RS08190		3.37719	2.09				0.340933	0.990327
gene-VNG_2116C|VNG_2116C|uraA	VNG_2116C	VNG_RS08195	NCS2 family permease	VNG_RS08195		-0.460756	-0.22677	-0.647			-0.0189631	-0.170954
gene-VNG_2117C|VNG_2117C|apt2	VNG_2117C	VNG_RS08200	adeninephosphoribosyl transferase	VNG_RS08200		0.0352015	0.680121				0.476994	-1.07784
gene-VNG_2118G|VNG_2118G|pyrE2	VNG_2118G	VNG_RS08205	orotatephosphoribosyl transferase	VNG_RS08205		0.0726762	2.08611				-1.39242	-0.576946
gene-VNG_2119C|VNG_2119C|carS	VNG_2119C	VNG_RS08210	CDP-2,3-bis-(O-geranyl geranyl )-sn-glycerolsynthase	VNG_RS08210
gene-VNG_2120G|VNG_2120G|fadM	VNG_2120G	VNG_RS08215	prolinedehydrogenase	VNG_RS08215		-0.312112	0.977103				-0.763404	-0.481741
gene-VNG_2121C|VNG_2121C|VNG_2121C	VNG_2121C	VNG_RS08220	DUF502 domain -containing protein	VNG_RS08220		0.438804	0.54582				-0.222497	0.15955
gene-VNG_2122G|VNG_2122G|ilvE2	VNG_2122G	VNG_RS08225	branched-chainaminoacid transaminase	VNG_RS08225		-1.55995	-0.488127		-0.5272		0.230109	-1.25786
gene-VNG_2123G|VNG_2123G|nhaC2	VNG_2123G	VNG_RS08230	Na+/H+antiporterNhaC family protein	VNG_RS08230								-1.04132
gene-VNG_2124C|VNG_2124C|nhaC4	VNG_2124C	VNG_RS08235	Na+/H+antiporterNhaC family protein	VNG_RS08235		1.21341	0.232662				1.27054	-0.245721
gene-VNG_2125G|VNG_2125G|ribB	VNG_2125G	VNG_RS08240	3,4-dihydroxy-2-butanone-4-phosphatesynthase	ribB		0.961201	1.1995				-0.259971	0.0657468
gene-VNG_2126C|VNG_2126C|ribK	VNG_2126C	VNG_RS08245	DUF120 domain -containing protein	VNG_RS08245		0.972586	0.455804				0.545166	0.0156866
gene-VNG_2128C|VNG_2128C|taw1	VNG_2128C	VNG_RS08250	4-demethyl wyosinesynthaseTYW1	VNG_RS08250		1.26932	1.20619					-0.262876
gene-VNG_2129H|VNG_2129H|VNG_2129H	VNG_2129H					0.565716						0.659121
gene-VNG_2130G|VNG_2130G|parA2	VNG_2130G	VNG_RS08255	MinD/ParA family protein	VNG_RS08255		-1.17125	-0.641807				-0.466422	-0.0189504
gene-VNG_2131G|VNG_2131G|arf1	VNG_2131G	VNG_RS08260	peptidechainreleasefactoraRF-1	VNG_RS08260		-0.13215	0.0462489				0.324991	-0.45932
gene-VNG_2132G|VNG_2132G|fer1	VNG_2132G	VNG_RS08265	2Fe-2S iron-sulfur cluster binding domain-containing protein	VNG_RS08265		0.828751	0.544059				-0.0704934	0.399254
gene-VNG_2133H|VNG_2133H|VNG_2133H	VNG_2133H	VNG_RS08270	hypothetical protein	VNG_RS08270		0.773255	0.493708				0.17198	0.151638
gene-VNG_2135G|VNG_2135G|atpD	VNG_2135G	VNG_RS08275	V-typeATPsynthasesubunitD	VNG_RS08275		0.41608	0.669901				-0.400439	0.190688
gene-VNG_2136G|VNG_2136G|blh	VNG_2136G	VNG_RS08280	beta-carotene15,15'-dioxygenase,Brp/Blh family	VNG_RS08280		-1.68582	-5.10124				0.99301
gene-VNG_2137G|VNG_2137G|crtY	VNG_2137G	VNG_RS08285	lycopenecyclase domain -containing protein	VNG_RS08285		-1.61182	-2.22677				0.514469	0.144548
gene-VNG_2138G|VNG_2138G|atpB	VNG_2138G	VNG_RS08290	ATPsynthasesubunitB	VNG_RS08290		-1.38523	-0.705001		-0.469729		0.666472	-1.30263
gene-VNG_2139G|VNG_2139G|atpA	VNG_2139G	VNG_RS08295	ATPsynthasesubunitA	VNG_RS08295		-1.55591	-0.601967	-0.555	-1.17202		0.681739	-1.59162
gene-VNG_2140G|VNG_2140G|atpF	VNG_2140G	VNG_RS08300	V-typeATPsynthasesubunitF	VNG_RS08300		-1.27622	-0.293884	-0.608			0.482048	-1.42031
gene-VNG_2141G|VNG_2141G|atpC	VNG_2141G	VNG_RS08305	V-typeATPsynthasesubunitC	VNG_RS08305		-1.45741	-0.443199	-0.694			0.329679	-1.29982
gene-VNG_2142G|VNG_2142G|atpE	VNG_2142G	VNG_RS08310	V-typeATPsynthasesubunitE	VNG_RS08310		-1.28463	-0.808346	-0.761			0.484524	-0.916739
gene-VNG_2143G|VNG_2143G|atpK	VNG_2143G	VNG_RS08315	F0F1ATPsynthasesubunitC	VNG_RS08315		-2.05389	-0.557145	-0.719			0.480658	-1.93334
gene-VNG_2144G|VNG_2144G|atpI	VNG_2144G	VNG_RS08320	V-typeATPsynthasesubunitI	VNG_RS08320		-1.3539	-0.0895416	-0.83	-0.431676		0.218942	-1.43923
gene-VNG_2146H|VNG_2146H|atpH	VNG_2146H	VNG_RS08325	ATPsynthasearchaealsubunitH	ahaH		-0.733844	0.572427				-0.218495	-1.04371
gene-VNG_2147a|VNG_2147a|VNG_2147a	VNG_2147a	VNG_RS08335	hypothetical protein	VNG_RS08335
gene-VNG_2147G|VNG_2147G|menG	VNG_2147G	VNG_RS08330	methyl transferase domain -containing protein	VNG_RS08330		-0.107119	0.460555				0.161609	-0.685213
gene-VNG_2148H|VNG_2148H|VNG_2148H	VNG_2148H	VNG_RS08340	hypothetical protein	VNG_RS08340		-0.871689	-0.674974				0.614498	-0.767143
gene-VNG_2149H|VNG_2149H|VNG_2149H	VNG_2149H	VNG_RS08345	hypothetical protein	VNG_RS08345		-0.799281	0.291079				-0.357488	-0.688802
gene-VNG_2150G|VNG_2150G|etfB	VNG_2150G	VNG_RS08350	electron transferflavo protein subunitbeta/FixA family protein	VNG_RS08350		0.142167	0.781404				-0.187563	-0.407605
gene-VNG_2151G|VNG_2151G|etfA	VNG_2151G	VNG_RS08355	electron transferflavo protein subunitalpha/FixB family protein	VNG_RS08355		0.0079534	0.565998				-0.270871	-0.243103
gene-VNG_2152C|VNG_2152C|VNG_2152C	VNG_2152C	VNG_RS08360	YbhB/YbcL family Rafkinaseinhibitor-like protein	VNG_RS08360		-2.30875	0.943155				-1.60393	-1.60391
gene-VNG_2153G|VNG_2153G|idsA2	VNG_2153G	VNG_RS08365	polyprenyl synthetase family protein	VNG_RS08365		0.798377	1.60612				-0.729457	-0.0342172
gene-VNG_2154C|VNG_2154C|VNG_2154C	VNG_2154C	VNG_RS08370	DUF373 family protein	VNG_RS08370		-0.543218	-1.17232				0.0965141	0.576659
gene-VNG_2155C|VNG_2155C|VNG_2155C	VNG_2155C	VNG_RS08375	radicalSAM protein	VNG_RS08375		1.21702	1.7956				-0.646994	0.112487
gene-VNG_2156C|VNG_2156C|VNG_2156C	VNG_2156C	VNG_RS08380	TIGR03663 family protein	VNG_RS08380
gene-VNG_2157C|VNG_2157C|VNG_2157C	VNG_2157C	VNG_RS08385	TRAM domain -containing protein	VNG_RS08385		-0.970337	0.358193				-0.780083	-0.504377
gene-VNG_2158G|VNG_2158G|VNG_2158G	VNG_2158G	VNG_RS08390	SDR family oxidoreductase	VNG_RS08390		-0.316447	0.340046				-0.377155	-0.235268
gene-VNG_2159G|VNG_2159G|manC	VNG_2159G	VNG_RS08395	mannose-1-phosphateguanyl yl transferase	VNG_RS08395		-0.881743						0.118553
gene-VNG_2160C|VNG_2160C|rpa3	VNG_2160C	VNG_RS08400	replication protein A	VNG_RS08400		-1.16531	-1.28257				0.639713	-0.478382
gene-VNG_2162C|VNG_2162C|rpap3	VNG_2162C	VNG_RS08405	RPA family protein	VNG_RS08405		-1.3379	-0.972632		-1.0523		0.419921	-0.741119
gene-VNG_2163H|VNG_2163H|VNG_2163H	VNG_2163H	VNG_RS08410	ribbon-helix-helix protein ,CopG family	VNG_RS08410		-0.360911	-0.221475				-0.165556	0.0701901
gene-VNG_2164C|VNG_2164C|VNG_2164C	VNG_2164C	VNG_RS08415	hypothetical protein	VNG_RS08415		0.167552	2.16555				-1.23196	-0.721969
gene-VNG_2165H|VNG_2165H|VNG_2165H	VNG_2165H	VNG_RS08425	DUF4097 family betastrandrepeat protein	VNG_RS08425		-1.84932	0.251278				-0.922102	-1.13443
gene-VNG_2166C|VNG_2166C|VNG_2166C	VNG_2166C	VNG_RS08430	saccharopine dehydrogenase NADP-binding domain-containing protein	VNG_RS08430		-0.355674	0.251278				-0.980995	0.418113
gene-VNG_2167G|VNG_2167G|VNG_2167G	VNG_2167G	VNG_RS08435	AAA family ATPase	VNG_RS08435		-1.35766	-0.342247				-0.488448	-0.482898
gene-VNG_2168C|VNG_2168C|VNG_2168C	VNG_2168C	VNG_RS08440	CBS domain -containing protein	VNG_RS08440		-1.45665	-2.02514				0.476994	0.13556
gene-VNG_2170H|VNG_2170H|VNG_2170H	VNG_2170H	VNG_RS08450	cupin domain -containing protein	VNG_RS08450		0.108858	0.47367				0.218076	-0.538818
gene-VNG_2171G|VNG_2171G|VNG_2171G	VNG_2171G	VNG_RS08445	iron-containingalcoholdehydrogenase	VNG_RS08445		3.68673	1.94316					0.93214
gene-VNG_2172C|VNG_2172C|VNG_2172C	VNG_2172C	VNG_RS08455	phospho transferase family protein	VNG_RS08455		0.879377	2.00205					-0.126754
gene-VNG_2173G|VNG_2173G|ashA	VNG_2173G	VNG_RS08460	DEAD/DEAHboxhelicase	VNG_RS08460		0.323515	1.2415				-0.394472	-0.479439
gene-VNG_2174H|VNG_2174H|VNG_2174H	VNG_2174H
gene-VNG_2177a|VNG_2177a|VNG_2177a	VNG_2177a
gene-VNG_2177H|VNG_2177H|VNG_2177H	VNG_2177H	VNG_RS13385	hypothetical protein	VNG_RS13385
gene-VNG_2178a|VNG_2178a|VNG_2178a	VNG_2178a	VNG_RS13390	pseudo	VNG_RS13390		-0.0337459	1.68012					-1.78834
gene-VNG_2178H|VNG_2178H|VNG_2178H	VNG_2178H	VNG_RS08475	hypothetical protein	VNG_RS08475		-0.171249	0.680121					-0.984735
gene-VNG_2179H|VNG_2179H|VNG_2179H	VNG_2179H	VNG_RS08485	hypothetical protein	VNG_RS08485		-0.792738	-0.293884				-0.00699048	-0.447794
gene-VNG_2180C|VNG_2180C|VNG_2180C	VNG_2180C	VNG_RS08490	histidinekinase	VNG_RS08490		0.333223	1.52812				-0.763404	-0.387421
gene-VNG_2181G|VNG_2181G|mcm	VNG_2181G	VNG_RS08495	ATP-binding protein	VNG_RS08495		0.321791	1.27876				-0.355061	-0.557837
gene-VNG_2182H|VNG_2182H|VNG_2182H	VNG_2182H	VNG_RS08500	hypothetical protein	VNG_RS08500		1.15068	0.528118					-0.188875
gene-VNG_2183H|VNG_2183H|VNG_2183H	VNG_2183H	VNG_RS08505	hypothetical protein	VNG_RS08505
gene-VNG_2184G|VNG_2184G|tfbA	VNG_2184G	VNG_RS08510	transcriptioninitiationfactorIIB family protein	VNG_RS08510		0.858498	0.0586326				0.270543	0.573392
gene-VNG_2185a|VNG_2185a|parA11	VNG_2185a	VNG_RS08520	AAA family ATPase	VNG_RS08520		1.91621	2.60612				-0.88146	0.235622
gene-VNG_2185H|VNG_2185H|VNG_2185H	VNG_2185H	VNG_RS08515	hypothetical protein	VNG_RS08515
gene-VNG_2186G|VNG_2186G|hit1	VNG_2186G	VNG_RS08525	HIT family protein	VNG_RS08525		1.60404	3.04749				-1.52301	0.123628
gene-VNG_2187H|VNG_2187H|VNG_2187H	VNG_2187H	VNG_RS08530	hypothetical protein	VNG_RS08530		0.323515	1.16555				-1.01896	0.221
gene-VNG_2189H|VNG_2189H|VNG_2189H	VNG_2189H	VNG_RS08535	hypothetical protein	VNG_RS08535			0.528118					-1.18888
gene-VNG_2190G|VNG_2190G|ileS	VNG_2190G	VNG_RS08540	isoleucine--tRNAligase	VNG_RS08540		0.539244	0.92454				0.0965141	-0.43774
gene-VNG_2191H|VNG_2191H|VNG_2191H	VNG_2191H	VNG_RS08545	hypothetical protein	VNG_RS08545		-4.0989	-4.14287				0.787999	-0.69996
gene-VNG_2193G|VNG_2193G|cbaA	VNG_2193G	VNG_RS08550	b(o/a)3-typecytochrome-coxidasesubunit1	VNG_RS08550		-4.21172	-3.961				0.675417	-0.882069
gene-VNG_2195G|VNG_2195G|cbaB	VNG_2195G	VNG_RS08555	cytochromecoxidasesubunitII	VNG_RS08555		-3.40168	-3.20271				0.735585	-0.890486
gene-VNG_2196G|VNG_2196G|hcpB	VNG_2196G	VNG_RS14385	halocyanin domain -containing protein	VNG_RS14385		-3.73985	-3.03474				0.418977	-1.08001
gene-VNG_2197H|VNG_2197H|VNG_2197H	VNG_2197H	VNG_RS08565	hypothetical protein	VNG_RS08565		-0.838674	-0.212964				0.801058	-1.3827
gene-VNG_2199H|VNG_2199H|VNG_2199H	VNG_2199H	VNG_RS08570	sulfiteexporterTauE/SafE family protein	VNG_RS08570		-1.50246	0.972903				-1.4299	-1.00139
gene-VNG_2201G|VNG_2201G|cpx	VNG_2201G	VNG_RS08575	heavymetal translocatingP-typeATPase	VNG_RS08575		-0.93421	-0.042345				-0.492417	-0.355378
gene-VNG_2202H|VNG_2202H|VNG_2202H	VNG_2202H	VNG_RS08580	hypothetical protein	VNG_RS08580		-2.65668	-1.31988				0.0481511	-1.34088
gene-VNG_2203G|VNG_2203G|prsA	VNG_2203G	VNG_RS08585	ribose-phosphatepyrophosphokinase	VNG_RS08585		0.590591	1.70397		2.03696		-1.08309	0.0137864
gene-VNG_2204H|VNG_2204H|VNG_2204H	VNG_2204H	VNG_RS08590	hypothetical protein	VNG_RS08590		0.70322	1.75051					-0.273764
gene-VNG_2205H|VNG_2205H|VNG_2205H	VNG_2205H	VNG_RS08595	hypothetical protein	VNG_RS08595		0.636106	1.05863					-0.649001
gene-VNG_2206G|VNG_2206G|pmm1	VNG_2206G	VNG_RS08600	phosphoglucosaminemutase	glmM		-0.369189	0.758124				-0.259971	-0.823271
gene-VNG_2207H|VNG_2207H|VNG_2207H	VNG_2207H	VNG_RS08605	hypothetical protein	VNG_RS08605		1.55458	0.972903				0.155066	0.470676
gene-VNG_2208G|VNG_2208G|trpS1	VNG_2208G	VNG_RS08610	tryptophan--tRNAligase	VNG_RS08610		0.837212	1.18046		0.838669		0.227475	-0.526652
gene-VNG_2210G|VNG_2210G|endA	VNG_2210G	VNG_RS08615	tRNA-intronlyase	endA		0.625217	1.35819				-0.392422	-0.296484
gene-VNG_2211H|VNG_2211H|VNG_2211H	VNG_2211H	VNG_RS08620	DUF91 domain -containing protein	VNG_RS08620		1.26171	1.63121					-0.443972
gene-VNG_2213G|VNG_2213G|brr2	VNG_2213G	VNG_RS08625	DEAD/DEAHboxhelicase	VNG_RS08625		1.09178	2.16199				-0.515332	-0.510804
gene-VNG_2214G|VNG_2214G|VNG_2214G	VNG_2214G	VNG_RS08630	MATE family efflux transporter	VNG_RS08630		-0.47081	-1.52633				1.44047	-0.340879
gene-VNG_2216G|VNG_2216G|lipA	VNG_2216G	VNG_RS08635	lipoyl synthase	lipA		-1.20601	-1.28817				0.218076	-0.091851
gene-VNG_2217G|VNG_2217G|oxdhA1	VNG_2217G	VNG_RS08640	pyruvatedehydrogenase(acetyl - transferring)E1componentsubunitalpha	pdhA		-0.815106	0.527012				-0.0678727	-1.23018
gene-VNG_2218G|VNG_2218G|oxdhB	VNG_2218G	VNG_RS08645	alpha-ketoaciddehydrogenasesubunitbeta	VNG_RS08645		-0.486123	0.372268				0.270543	-1.08486
gene-VNG_2219G|VNG_2219G|dsa	VNG_2219G	VNG_RS08650	2-oxoaciddehydrogenasesubunitE2	VNG_RS08650		-0.37023	0.272463				0.666649	-1.26527
gene-VNG_2220G|VNG_2220G|lpdA	VNG_2220G	VNG_RS08655	dihydrolipoyl dehydrogenase	lpdA		-0.037295	0.135801				0.938834	-1.06786
gene-VNG_2222G|VNG_2222G|pheA	VNG_2222G	VNG_RS08660	prephenatedehydratase	pheA		0.091785	0.0951585				0.533578	-0.492882
gene-VNG_2223G|VNG_2223G|leuS	VNG_2223G	VNG_RS08665	leucine--tRNAligase	VNG_RS08665		0.360132	0.156559				0.379068	-0.131425
gene-VNG_2224G|VNG_2224G|ala	VNG_2224G	VNG_RS08670	alaninedehydrogenase	VNG_RS08670		-0.0492589	1.20619				-0.910029	-0.30135
gene-VNG_2226G|VNG_2226G|ths1	VNG_2226G	VNG_RS08675	thermosomesubunit	VNG_RS08675		-0.576858	-0.688824		0.270947		0.565737	-0.409701
gene-VNG_2227C|VNG_2227C|dim2	VNG_2227C	VNG_RS08680	RNA-processing protein	VNG_RS08680		-0.283724	-0.191146				-0.144494	0.0959854
gene-VNG_2230H|VNG_2230H|VNG_2230H	VNG_2230H	VNG_RS08685	helix-turn-helix domain -containing protein	VNG_RS08685		1.41371	0.358193					-0.340879
gene-VNG_2231C|VNG_2231C|VNG_2231C	VNG_2231C	VNG_RS08690	MFS transporter	VNG_RS08690		2.41371	0.943155					0.659121
gene-VNG_2232G|VNG_2232G|trpS2	VNG_2232G	VNG_RS08695	tryptophan--tRNAligase	VNG_RS08695		-1.12234	-0.208848				-0.680547	-0.188875
gene-VNG_2233C|VNG_2233C|rio1	VNG_2233C	VNG_RS08700	serine protein kinaseRIO	VNG_RS08700		-0.303353	-0.459604				0.234018	-0.033697
gene-VNG_2234G|VNG_2234G|tif1A1	VNG_2234G	VNG_RS08705	translationinitiationfactoreIF-1A	eif1A		0.269323	0.284192					-0.340879
gene-VNG_2236H|VNG_2236H|VNG_2236H	VNG_2236H	VNG_RS08710	hypothetical protein	VNG_RS08710
gene-VNG_2237G|VNG_2237G|tyrS	VNG_2237G	VNG_RS08715	tyrosine--tRNAligase	VNG_RS08715		1.05114	0.493353				0.492936	0.108924
gene-VNG_2238C|VNG_2238C|VNG_2238C	VNG_2238C	VNG_RS08720	DUF460 domain -containing protein	VNG_RS08720		0.658826	-0.345566				0.603119	0.445342
gene-VNG_2239C|VNG_2239C|rnz	VNG_2239C	VNG_RS08725	ribonucleaseZ	rnz		1.88764	1.28419					0.0550502
gene-VNG_2240G|VNG_2240G|rfcC	VNG_2240G	VNG_RS08730	AAA family ATPase	VNG_RS08730		0.0213957	-0.239709				-0.144494	0.449668
gene-VNG_2241H|VNG_2241H|VNG_2241H	VNG_2241H	VNG_RS08735	hypothetical protein	VNG_RS08735			2.26508					-1.07784
gene-VNG_2242C|VNG_2242C|trmG10	VNG_2242C	VNG_RS08740	TIGR01177 family methyltransferase	VNG_RS08740		0.413713	0.84362					-1.24134
gene-VNG_2243G|VNG_2243G|tbpE	VNG_2243G	VNG_RS08745	TATA-box-binding protein	VNG_RS08745		-1.41549	0.208815				-0.144494	-1.43574
gene-VNG_2244H|VNG_2244H|VNG_2244H	VNG_2244H	VNG_RS08750	hypothetical protein	VNG_RS08750		-1.23014	-0.687611				0.21165	-0.710112
gene-VNG_2246H|VNG_2246H|VNG_2246H	VNG_2246H	VNG_RS08755	hypothetical protein	VNG_RS08755		-0.668749					-2.72946	2.16162
gene-VNG_2247G|VNG_2247G|hisG	VNG_2247G	VNG_RS08760	ATPphosphoribosyl transferase	VNG_RS08760		0.27621	0.390614				-0.144494	0.074159
gene-VNG_2248H|VNG_2248H|VNG_2248H	VNG_2248H	VNG_RS08765	hypothetical protein	VNG_RS08765
gene-VNG_2249G|VNG_2249G|mtaD	VNG_2249G	VNG_RS08770	amidohydrolase	VNG_RS08770		-1.00132	0.764185				-0.822566	-0.898874
gene-VNG_2251G|VNG_2251G|ahcY	VNG_2251G	VNG_RS08775	adenosyl homocysteinase	VNG_RS08775		0.425539	0.828666				-0.656525	0.297468
gene-VNG_2252G|VNG_2252G|hjc	VNG_2252G	VNG_RS08780	nucleoid-structuring protein H-NS	VNG_RS08780		1.27354	1.03376				-0.144494	0.428341
gene-VNG_2253H|VNG_2253H|VNG_2253H	VNG_2253H	VNG_RS08785	hypothetical protein	VNG_RS08785		1.22107	-0.542271					0.144548
gene-VNG_2254C|VNG_2254C|priL	VNG_2254C	VNG_RS08790	DNAprimaseregulatorysubunitPriL	priL		-0.29678	0.194694				0.0778984	-0.525303
gene-VNG_2255C|VNG_2255C|psd	VNG_2255C	VNG_RS08795	protein sortingsystemarchaetidyl serinedecarboxyl ase	VNG_RS08795		0.150679						-0.0189504
gene-VNG_2256G|VNG_2256G|pcn	VNG_2256G	VNG_RS08800	DNApolymeraseslidingclamp	VNG_RS08800		0.215774	0.466717				0.155066	-0.36194
gene-VNG_2257G|VNG_2257G|VNG_2257G	VNG_2257G	VNG_RS08805	sodium:calciumantiporter	VNG_RS08805			0.358193					-0.925841
gene-VNG_2259C|VNG_2259C|ppcA	VNG_2259C	VNG_RS08810	phosphoenolpyruvatecarboxyl ase	VNG_RS08810		0.712426	-0.467033				0.750153	0.473376
gene-VNG_2260H|VNG_2260H|VNG_2260H	VNG_2260H	VNG_RS08815	hypothetical protein	VNG_RS08815		0.391687	0.265084				-0.603926	0.774599
gene-VNG_2262a|VNG_2262a|VNG_2262a	VNG_2262a	VNG_RS08825	hypothetical protein	VNG_RS08825
gene-VNG_2262H|VNG_2262H|VNG_2262H	VNG_2262H	VNG_RS08820	hypothetical protein	VNG_RS08820
gene-VNG_2263G|VNG_2263G|rlmE	VNG_2263G	VNG_RS08830	TRAM domain -containing protein	VNG_RS08830		0.740214	0.850046				-0.536811	0.471049
gene-VNG_2264C|VNG_2264C|VNG_2264C	VNG_2264C	VNG_RS08835	queuosineprecursor transporter	VNG_RS08835		0.288182	1.05863				-0.144494	-0.581887
gene-VNG_2267G|VNG_2267G|tatC2	VNG_2267G	VNG_RS08845	Sec-independent protein translocaseTatC	tatC		0.195533	-0.545592				0.465559	0.319635
gene-VNG_2268H|VNG_2268H|VNG_2268H	VNG_2268H	VNG_RS08840	typeIItoxin-antitoxinsystemParD family antitoxin	VNG_RS08840			0.680121					-2.07784
gene-VNG_2269G|VNG_2269G|tatC1	VNG_2269G	VNG_RS08850	pre protein translocasesubunitTatC	VNG_RS08850		-0.647687	-0.24949				-0.144494	-0.209634
gene-VNG_2270G|VNG_2270G|mutS5a	VNG_2270G	VNG_RS08855	endonuclease MutS2	VNG_RS08855		-0.0137081	0.83624				-0.0375788	-0.7683
gene-VNG_2271G|VNG_2271G|orc6	VNG_2271G	VNG_RS08860	ORC1-typeDNAreplication protein	VNG_RS08860		-1.73068	-0.139307				0.218076	-1.76538
gene-VNG_2272G|VNG_2272G|rpiA	VNG_2272G	VNG_RS08865	ribose5-phosphateisomeraseA	rpiA		0.243788	-0.15638					-0.148233
gene-VNG_2273a|VNG_2273a|VNG_2273a	VNG_2273a					0.814811	-2.85202				2.03771	1.6732
gene-VNG_2273H|VNG_2273H|VNG_2273H	VNG_2273H	VNG_RS08870	DUF1931 family protein	VNG_RS08870		-1.28806	0.37346		-1.23141		-0.0817582	-1.53569
gene-VNG_2274C|VNG_2274C|VNG_2274C	VNG_2274C	VNG_RS08875	GIY-YIGnuclease family protein	VNG_RS08875		1.46102	-1.4898				1.7035	1.29139
gene-VNG_2276G|VNG_2276G|pmm2	VNG_2276G	VNG_RS08880	phosphoglucomutase/phosphomannomutase family protein	VNG_RS08880		0.774303	-0.336952				1.18808	-0.0327562
gene-VNG_2277H|VNG_2277H|VNG_2277H	VNG_2277H	VNG_RS08885	GNAT family N-acetyl transferase	VNG_RS08885
gene-VNG_2279H|VNG_2279H|samp2	VNG_2279H	VNG_RS08890	MoaD/ThiS family protein	VNG_RS08890		0.565716	0.943155					-0.603913
gene-VNG_2280G|VNG_2280G|rfcA	VNG_2280G	VNG_RS08895	replicationfactorCsmallsubunit	VNG_RS08895		0.207262	0.615991				0.0571399	-0.421798
gene-VNG_2281C|VNG_2281C|VNG_2281C	VNG_2281C	VNG_RS08900	glutathioneS- transferase family protein	VNG_RS08900		0.279665	-0.356716	0.573			0.631383	0.049068
gene-VNG_2282C|VNG_2282C|VNG_2282C	VNG_2282C	VNG_RS08905	DsbA family protein	VNG_RS08905		0.27621	1.46672				-0.603926	-0.542512
gene-VNG_2283G|VNG_2283G|alaS	VNG_2283G	VNG_RS08910	alanine--tRNAligase	VNG_RS08910		0.302166	0.194023				0.474416	-0.322203
gene-VNG_2284G|VNG_2284G|hisI	VNG_2284G	VNG_RS08915	phosphoribosyl -AMPcyclohydrolase	hisI		1.02515	1.42858				-0.407528	0.0481638
gene-VNG_2285C|VNG_2285C|pibD	VNG_2285C	VNG_RS08920	prepilinpeptidase	VNG_RS08920		-0.00459955	1.10974				0.240796	-1.31106
gene-VNG_2286G|VNG_2286G|mamA	VNG_2286G	VNG_RS08925	methyl aspartatemutasesubunitS	mamA
gene-VNG_2288G|VNG_2288G|mamB	VNG_2288G	VNG_RS08930	methyl aspartatemutasesubunitE	VNG_RS08930		-1.55827	-1.64181				0.0899713	0.0376331
gene-VNG_2289G|VNG_2289G|mal	VNG_2289G	VNG_RS08935	methyl aspartateammonia-lyase	VNG_RS08935
gene-VNG_2290G|VNG_2290G|maoC1	VNG_2290G	VNG_RS08940	MaoC family dehydratase	VNG_RS08940
gene-VNG_2291G|VNG_2291G|cat	VNG_2291G	VNG_RS08945	acetyl -CoAhydrolase/ transferase family protein	VNG_RS08945			-0.52633					-1.23396
gene-VNG_2292H|VNG_2292H|VNG_2292H	VNG_2292H	VNG_RS08950	DUF2029 domain -containing protein	VNG_RS08950		-0.609371	-0.554344				-0.536811	0.525855
gene-VNG_2293G|VNG_2293G|fdx	VNG_2293G	VNG_RS08955	(2Fe-2S)-binding protein	VNG_RS08955		1.25785	1.33974				-0.0562668	0.0184544
gene-VNG_2294G|VNG_2294G|hisA	VNG_2294G	VNG_RS08960	1-(5-phosphoribosyl )-5-[(5-phosphoribosyl amino)methyl ideneamino]imidazole-4-carboxamideisomerase	VNG_RS08960		-1.9786	-1.2633				-0.214883	-0.456356
gene-VNG_2295G|VNG_2295G|hisB	VNG_2295G	VNG_RS08965	imidazoleglycerol-phosphatedehydrataseHisB	hisB		-0.223717	0.358193				-0.629921	0.0920809
gene-VNG_2296C|VNG_2296C|VNG_2296C	VNG_2296C	VNG_RS08975	aminoacid-binding protein	VNG_RS08975		-2.45136					-0.424602
gene-VNG_2297H|VNG_2297H|VNG_2297H	VNG_2297H	VNG_RS08970	hypothetical protein	VNG_RS08970		2.37307	0.0211579				2.85551	-0.459523
gene-VNG_2298a|VNG_2298a|VNG_2298a	VNG_2298a	VNG_RS08985	YigZ family protein	VNG_RS08985		0.472607	1.35819					-0.697022
gene-VNG_2298H|VNG_2298H|VNG_2298H	VNG_2298H	VNG_RS08980	hypothetical protein	VNG_RS08980		-0.711818						-1.27376
gene-VNG_2301G|VNG_2301G|trxB3	VNG_2301G	VNG_RS08995	NAD(P)/FAD-dependentoxidoreductase	VNG_RS08995		0.150679	0.798766					-1.26688
gene-VNG_2302G|VNG_2302G|VNG_2302G	VNG_2302G	VNG_RS09000	S9 family peptidase	VNG_RS09000		-0.908215	0.305726				-0.396033	-0.773838
gene-VNG_2304H|VNG_2304H|VNG_2304H	VNG_2304H	VNG_RS09005	hypothetical protein	VNG_RS09005		-0.697318	0.194694				-0.507064	-0.340879
gene-VNG_2305C|VNG_2305C|upp	VNG_2305C	VNG_RS09010	uracilphosphoribosyl transferase	upp		-0.493178	0.232662		0.209391		0.11854	-0.80031
gene-VNG_2306H|VNG_2306H|VNG_2306H	VNG_2306H	VNG_RS09015	hypothetical protein	VNG_RS09015		0.328322	0.126019				0.206978	0.0393936
gene-VNG_2307C|VNG_2307C|VNG_2307C	VNG_2307C	VNG_RS09020	inorganicphosphate transporter	VNG_RS09020		-0.171249	0.977103				-0.659067	-0.445215
gene-VNG_2308G|VNG_2308G|VNG_2308G	VNG_2308G	VNG_RS09025	HlyC/CorC family transporter	VNG_RS09025		-0.904734	-0.641807				0.361691	-0.580549
gene-VNG_2310H|VNG_2310H|grx2	VNG_2310H	VNG_RS09030	glutaredoxin	VNG_RS09030		0.0657898	0.165548				-0.951849	0.896161
gene-VNG_2311H|VNG_2311H|VNG_2311H	VNG_2311H	VNG_RS09035	peroxiredoxin	VNG_RS09035		0.402217	-0.620112				0.507583	0.558817
gene-VNG_2312a|VNG_2312a|VNG_2312a	VNG_2312a	VNG_RS09045	hypothetical protein	VNG_RS09045
gene-VNG_2312C|VNG_2312C|yrdC	VNG_2312C	VNG_RS09040	threonyl carbamoyl -AMPsynthase	VNG_RS09040		0.352313	-0.941367					0.482244
gene-VNG_2313H|VNG_2313H|VNG_2313H	VNG_2313H	VNG_RS09050	hypothetical protein	VNG_RS09050		-2.17125	0.47367				-0.88146	-1.71939
gene-VNG_2314H|VNG_2314H|VNG_2314H	VNG_2314H	VNG_RS09055	hypothetical protein	VNG_RS09055		-0.849321	0.47367					-0.71939
gene-VNG_2315H|VNG_2315H|VNG_2315H	VNG_2315H	VNG_RS09060	hypothetical protein	VNG_RS09060		0.800736	2.24572		-1.53575		-0.523006	-0.877907
gene-VNG_2316C|VNG_2316C|bioY	VNG_2316C	VNG_RS09065	biotin transporter BioY	VNG_RS09065		2.52919						0.359561
gene-VNG_2317a|VNG_2317a|bioN	VNG_2317a	VNG_RS09075	energy-coupling factor transporter transmembrane protein EcfT	VNG_RS09075
gene-VNG_2317G|VNG_2317G|bioM	VNG_2317G	VNG_RS09070	ABC transporter ATP-binding protein	VNG_RS09070		2.78295	1.05863					0.912878
gene-VNG_2320G|VNG_2320G|VNG_2320G	VNG_2320G	VNG_RS09080	4Fe-4Sdicluster domain -containing protein	VNG_RS09080		-0.509666	-0.319879				0.597708	-0.743425
gene-VNG_2321a|VNG_2321a|VNG_2321a	VNG_2321a	VNG_RS09090	hypothetical protein	VNG_RS09090
gene-VNG_2321G|VNG_2321G|VNG_2321G	VNG_2321G	VNG_RS09085	GNAT family N-acetyl transferase	VNG_RS09085		4.12153	2.96023		1.16582		1.34093	-0.13556
gene-VNG_2322G|VNG_2322G|hemB	VNG_2322G	VNG_RS09095	porphobilinogensynthase	hemB		0.0352015	1.01027				-1.03758	0.10658
gene-VNG_2323H|VNG_2323H|VNG_2323H	VNG_2323H	VNG_RS09100	CPBP family intramembranemetalloprotease	VNG_RS09100		1.70322	0.943155					0.533591
gene-VNG_2324H|VNG_2324H|VNG_2324H	VNG_2324H	VNG_RS09105	CPBP family intramembrane metalloprotease	VNG_RS09105		-1.49318					0.11854
gene-VNG_2326G|VNG_2326G|hemL	VNG_2326G	VNG_RS09110	glutamate-1-semialdehyde2,1-aminomutase	VNG_RS09110		0.535019	-0.432354		0.742265		0.607578	0.403864
gene-VNG_2328H|VNG_2328H|VNG_2328H	VNG_2328H	VNG_RS09115	hypothetical protein	VNG_RS09115		-0.460756	-1.00438				0.565999	0.0216916
gene-VNG_2329C|VNG_2329C|VNG_2329C	VNG_2329C	VNG_RS09120	hypothetical protein	VNG_RS09120		1.01318	0.184164				0.855506	0.0175755
gene-VNG_2330G|VNG_2330G|hemC	VNG_2330G	VNG_RS09125	hydroxymethyl bilanesynthase	hemC		0.364803	0.393817				0.270543	-0.255487
gene-VNG_2331G|VNG_2331G|sirA	VNG_2331G	VNG_RS09130	uroporphyrinogen-IIIC-methyl transferase	cobA		0.651873	0.817625				0.155066	-0.276748
gene-VNG_2332G|VNG_2332G|hemD	VNG_2332G	VNG_RS09135	uroporphyrinogen-IIIsynthase	VNG_RS09135		-0.434284	0.77323				-1.14449	-0.0189504
gene-VNG_2333C|VNG_2333C|recJ1	VNG_2333C	VNG_RS09140	DHH family phosphoesterase	VNG_RS09140		0.0109539	0.0644617				0.402994	-0.412432
gene-VNG_2334C|VNG_2334C|VNG_2334C	VNG_2334C	VNG_RS09145	PAS domain -containing protein	VNG_RS09145		0.278198	-0.159744				0.199159	0.282854
gene-VNG_2335H|VNG_2335H|VNG_2335H	VNG_2335H	VNG_RS09150	hypothetical protein	VNG_RS09150		1.15068	1.94316					0.396087
gene-VNG_2337C|VNG_2337C|VNG_2337C	VNG_2337C	VNG_RS09155	NifU family protein	VNG_RS09155		0.907528	1.21164				-0.299772	0.0397255
gene-VNG_2338G|VNG_2338G|polD2	VNG_2338G	VNG_RS09160	DNA-directedDNApolymeraseIIlargesubunit	VNG_RS09160		0.94837	0.348543				0.342858	0.30104
gene-VNG_2339a|VNG_2339a|VNG_2339a	VNG_2339a					-3.00775	-0.834452				-0.203388	-1.92584
gene-VNG_2339C|VNG_2339C|VNG_2339C	VNG_2339C	VNG_RS09165	DNA-binding protein	VNG_RS09165		1.13253	0.220689				0.314938	0.640974
gene-VNG_2340H|VNG_2340H|VNG_2340H	VNG_2340H	VNG_RS09170	hypothetical protein	VNG_RS09170		-0.0801015	-0.296848				0.189925	0.0708913
gene-VNG_2341H|VNG_2341H|VNG_2341H	VNG_2341H	VNG_RS09175	hypothetical protein	VNG_RS09175
gene-VNG_2342H|VNG_2342H|VNG_2342H	VNG_2342H	VNG_RS09180	hypothetical protein	VNG_RS09180			-1.48134				1.94297	-1.41888
gene-VNG_2343G|VNG_2343G|dppF1	VNG_2343G	VNG_RS09185	ABC transporter ATP-binding protein	VNG_RS09185		-2.9786	-1.41663				0.613748	-2.13165
gene-VNG_2344G|VNG_2344G|dppD1	VNG_2344G	VNG_RS09190	ABC transporter ATP-binding protein	VNG_RS09190		-2.7073	-1.4478	-0.611			0.719991	-1.93543
gene-VNG_2346G|VNG_2346G|dppC1	VNG_2346G	VNG_RS09195	ABC transporter permease	VNG_RS09195		-3.12167	-1.38104	-0.488			0.423555	-2.12011
gene-VNG_2347G|VNG_2347G|dppB1	VNG_2347G	VNG_RS09200	ABC transporter permease	VNG_RS09200		-3.32558	-1.19702	-0.649			-0.0830935	-2.00139
gene-VNG_2349G|VNG_2349G|dppA1	VNG_2349G	VNG_RS09205	twin-arginine translocationsignal domain -containing protein	VNG_RS09205		-4.62723	-3.13323		-1.46873		0.84857	-2.2985
gene-VNG_2351C|VNG_2351C|VNG_2351C	VNG_2351C	VNG_RS09210	CBS domain -containing protein	VNG_RS09210		-0.816154	-0.151481		-0.741541		-0.178441	-0.442162
gene-VNG_2352G|VNG_2352G|glyS	VNG_2352G	VNG_RS09215	glycine--tRNAligase	glyS		-0.520995	-0.488333				0.300291	-0.288884
gene-VNG_2353H|VNG_2353H|VNG_2353H	VNG_2353H	VNG_RS09220	dolichol kinase	VNG_RS09220			-0.748722					-2.04132
gene-VNG_2356G|VNG_2356G|hef	VNG_2356G	VNG_RS09225	DEAD/DEAHboxhelicase	VNG_RS09225		-0.0569167	1.15615				-0.284975	-0.884021
gene-VNG_2358G|VNG_2358G|dppA3	VNG_2358G	VNG_RS09230	twin-arginine translocationsignal domain -containing protein	VNG_RS09230		-2.75939	-3.23016	0.841			1.76197	-1.24713
gene-VNG_2359G|VNG_2359G|dppB3	VNG_2359G	VNG_RS09235	ABC transporter permease	VNG_RS09235		-2.88911	-3.30758	0.548			1.89535	-1.4328
gene-VNG_2361G|VNG_2361G|dppC3	VNG_2361G	VNG_RS09240	ABC transporter permease	VNG_RS09240		-2.92614	-3.48087				1.84657	-1.24777
gene-VNG_2363G|VNG_2363G|dppD3	VNG_2363G	VNG_RS09245	ABC transporter ATP-binding protein	VNG_RS09245		-3.55731	-3.15507				1.30464	-1.66281
gene-VNG_2365G|VNG_2365G|dppF3	VNG_2365G	VNG_RS09250	ATP-bindingcassette domain -containing protein	VNG_RS09250		-3.39906	-2.55038				1.12124	-1.92584
gene-VNG_2366C|VNG_2366C|VNG_2366C	VNG_2366C	VNG_RS09255	hypothetical protein	VNG_RS09255		1.45324	-0.194348				0.729975	0.961684
gene-VNG_2367G|VNG_2367G|mdh	VNG_2367G	VNG_RS09260	malatedehydrogenase	VNG_RS09260		0.941225	2.14827				-0.768985	-0.39399
gene-VNG_2368G|VNG_2368G|hel308a	VNG_2368G	VNG_RS09270	ATP-dependentDNAhelicase	VNG_RS09270		0.382349	0.580585				-0.1918	0.0376331
gene-VNG_2369C|VNG_2369C|cgi121	VNG_2369C	VNG_RS09275	KEOPS complex component	VNG_RS09275		-0.253712	2.60612					-0.501343
gene-VNG_2370C|VNG_2370C|fer6	VNG_2370C	VNG_RS09265	ferredoxin	VNG_RS09265		1.05114						1.88151
gene-VNG_2371C|VNG_2371C|purO	VNG_2371C	VNG_RS09285	IMPcyclohydrolase	purO
gene-VNG_2372G|VNG_2372G|VNG_2372G	VNG_2372G	VNG_RS09290	metallophosphoesterase family protein	VNG_RS09290		0.0817313	0.130782		0.464355		-0.466422	0.461441
gene-VNG_2373G|VNG_2373G|tnaA	VNG_2373G	VNG_RS09295	tryptophanase	VNG_RS09295		-1.11467	-1.58736				-0.0879105	0.604674
gene-VNG_2374G|VNG_2374G|lysC	VNG_2374G	VNG_RS09300	aspartatekinase	VNG_RS09300		1.18544	0.707342		0.206268		-0.109729	0.6319
gene-VNG_2376H|VNG_2376H|VNG_2376H	VNG_2376H	VNG_RS09305	hypothetical protein	VNG_RS09305			0.680121					-1.66281
gene-VNG_2377G|VNG_2377G|VNG_2377G	VNG_2377G	VNG_RS09310	ABC transporter permease	VNG_RS09310		-0.299005	-1.31582				1.12261	-0.0617244
gene-VNG_2378G|VNG_2378G|VNG_2378G	VNG_2378G	VNG_RS09315	ABC transporter ATP-binding protein	VNG_RS09315		-0.291931	-0.0303724		1.21406		-0.314419	0.0969303
gene-VNG_2379H|VNG_2379H|VNG_2379H	VNG_2379H	VNG_RS09320	hypothetical protein	VNG_RS09320		-0.393642	-0.471882					0.074159
gene-VNG_2380H|VNG_2380H|VNG_2380H	VNG_2380H	VNG_RS09325	DUF5518 domain -containing protein	VNG_RS09325		-0.740615	-0.818685				0.0323838	0.0897559
gene-VNG_2381G|VNG_2381G|uvrC	VNG_2381G	VNG_RS09330	excinucleaseABC subunitC	VNG_RS09330		0.131313	0.631211				-0.466422	0.0105939
gene-VNG_2383G|VNG_2383G|nrdB1	VNG_2383G	VNG_RS09335	ribonucleotide-diphosphatereductasesubunitbeta	VNG_RS09335		-1.4761	2.09516				-0.366886	-3.16031
gene-VNG_2384G|VNG_2384G|nrdA1	VNG_2384G	VNG_RS09340	ribonucleoside-diphosphatereductasesubunitalpha	VNG_RS09340		-1.06433	1.9993				-0.0375788	-2.98198
gene-VNG_2385H|VNG_2385H|VNG_2385H	VNG_2385H	VNG_RS14250	hypothetical protein	VNG_RS14250		-4.83421	-2.4303				-0.144494	-2.21535
gene-VNG_2386C|VNG_2386C|VNG_2386C	VNG_2386C	VNG_RS09345	universalstress protein	VNG_RS09345
gene-VNG_2387a|VNG_2387a|VNG_2387a	VNG_2387a					1.24379	-0.471882					0.489196
gene-VNG_2387H|VNG_2387H|VNG_2387H	VNG_2387H	VNG_RS09350	sulfite exporter TauE/SafE family protein	VNG_RS09350
gene-VNG_2390G|VNG_2390G|uvrB	VNG_2390G	VNG_RS09355	excinucleaseABC subunitUvrB	uvrB		1.49743	0.672302				0.337039	0.532164
gene-VNG_2392H|VNG_2392H|VNG_2392H	VNG_2392H	VNG_RS09360	hypothetical protein	VNG_RS09360		1.08962	0.437048				0.536824	0.159815
gene-VNG_2393G|VNG_2393G|tssA1	VNG_2393G	VNG_RS09365	sulfur transferase	VNG_RS09365		1.06654	0.721491				0.357642	0.0314764
gene-VNG_2394G|VNG_2394G|tssA2	VNG_2394G	VNG_RS09370	sulfur transferase	VNG_RS09370		1.4841	2.16555				-0.88146	0.244084
gene-VNG_2395C|VNG_2395C|thiB1	VNG_2395C	VNG_RS09375	thiamineABC transporter substrate-binding protein	VNG_RS09375		-0.530792	-0.641807				0.353006	-0.197921
gene-VNG_2396G|VNG_2396G|thiP	VNG_2396G	VNG_RS09380	ironABC transporter permease	VNG_RS09380		-1.07171	0.621227				-0.629921	-1.01895
gene-VNG_2397G|VNG_2397G|thiQ	VNG_2397G	VNG_RS09385	ABC transporter ATP-binding protein	VNG_RS09385		-0.493178	-0.0943193				-0.0879105	-0.266878
gene-VNG_2398G|VNG_2398G|VNG_2398G	VNG_2398G	VNG_RS09390	classISAM-dependentmethyl transferase	VNG_RS09390		0.76735	0.216174					-0.675298
gene-VNG_2399H|VNG_2399H|VNG_2399H	VNG_2399H	VNG_RS09395	DUF2391 family protein	VNG_RS09395
gene-VNG_2400H|VNG_2400H|VNG_2400H	VNG_2400H	VNG_RS09400	hypothetical protein	VNG_RS09400		-0.743156	0.10362				0.161609	-0.964315
gene-VNG_2402H|VNG_2402H|VNG_2402H	VNG_2402H
gene-VNG_2403H|VNG_2403H|VNG_2403H	VNG_2403H	VNG_RS09405	hypothetical protein	VNG_RS09405		0.298236	0.495696				0.476994	-0.630385
gene-VNG_2404G|VNG_2404G|VNG_2404G	VNG_2404G	VNG_RS09410	MATE family efflux transporter	VNG_RS09410		-0.171249						0.659121
gene-VNG_2406C|VNG_2406C|oapC	VNG_2406C	VNG_RS09415	Zn-ribbon domain -containing protein	VNG_RS09415		-0.270785	0.278758				-0.24403	-0.261444
gene-VNG_2408C|VNG_2408C|oapB	VNG_2408C	VNG_RS09420	DUF2073 domain -containing protein	VNG_RS09420		0.559144	0.781404				-0.144494	-0.033697
gene-VNG_2410G|VNG_2410G|oapA	VNG_2410G	VNG_RS09425	GTP-binding protein	VNG_RS09425		0.0697587	0.0875453				0.0590394	-0.0327562
gene-VNG_2411G|VNG_2411G|orc7	VNG_2411G	VNG_RS09430	AAA family ATPase	VNG_RS09430		-1.32011	0.358193				-0.646994	-0.987242
gene-VNG_2412H|VNG_2412H|VNG_2412H	VNG_2412H	VNG_RS09435	hypothetical protein	VNG_RS09435		-3.08623	-3.00535				0.286586	-0.323391
gene-VNG_2413H|VNG_2413H|VNG_2413H	VNG_2413H	VNG_RS09440	DoxX family protein	VNG_RS09440		-3.28314	-2.79281				0.535371	-0.981629
gene-VNG_2414H|VNG_2414H|VNG_2414H	VNG_2414H	VNG_RS09445	helix-turn-helix transcriptionalregulator	VNG_RS09445		1.11415	1.26508					0.0376331
gene-VNG_2415H|VNG_2415H|VNG_2415H	VNG_2415H	VNG_RS09450	hypothetical protein	VNG_RS09450		0.288182	1.94316					-0.466409
gene-VNG_2416G|VNG_2416G|sec11	VNG_2416G	VNG_RS09455	S26 family signalpeptidase	VNG_RS09455		1.1375	1.09516				0.302965	-0.21655
gene-VNG_2417G|VNG_2417G|polD1	VNG_2417G	VNG_RS09460	DNA-directedDNApolymeraseIIsmallsubunit	VNG_RS09460		-0.150188	1.36637				0.227475	-1.69996
gene-VNG_2418G|VNG_2418G|VNG_2418G	VNG_2418G	VNG_RS09465	alanine--glyoxyl ateamino transferase family protein	VNG_RS09465		0.76735	1.75051				-1.46642	0.527332
gene-VNG_2419C|VNG_2419C|VNG_2419C	VNG_2419C	VNG_RS09470	MFS transporter	VNG_RS09470		1.99868	1.16555					0.0216916
gene-VNG_2420G|VNG_2420G|metX	VNG_2420G	VNG_RS09475	homoserineO-acetyl transferase	metX
gene-VNG_2421G|VNG_2421G|metY	VNG_2421G	VNG_RS09480	O-acetyl homoserineaminocarboxypropyl transferase/cysteinesynthase	VNG_RS09480		2.83518	2.50115				-0.366886	0.744982
gene-VNG_2422G|VNG_2422G|VNG_2422G	VNG_2422G	VNG_RS09485	FAD-bindingoxidoreductase	VNG_RS09485		0.977977	-0.0568446				0.570104	0.508787
gene-VNG_2423G|VNG_2423G|serB	VNG_2423G	VNG_RS09490	phosphoserinephosphataseSerB	serB		0.776283	1.68012					1.09208
gene-VNG_2424G|VNG_2424G|serA1	VNG_2424G	VNG_RS09495	phosphoglyceratedehydrogenase	VNG_RS09495		0.0111665	0.332808				-0.563719	0.286148
gene-VNG_2426G|VNG_2426G|VNG_2426G	VNG_2426G	VNG_RS09500	acyl -CoAthioesterase	VNG_RS09500		1.28045	0.559827				0.0899713	0.674718
gene-VNG_2429G|VNG_2429G|VNG_2429G	VNG_2429G	VNG_RS09505	MFS transporter	VNG_RS09505		1.24379	0.631211					0.386103
gene-VNG_2430G|VNG_2430G|thrC1	VNG_2430G	VNG_RS09510	threoninesynthase	VNG_RS09510		1.69225	0.0744				1.30029	0.361628
gene-VNG_2431C|VNG_2431C|VNG_2431C	VNG_2431C	VNG_RS09515	hypothetical protein	VNG_RS09515		0.324446	-1.19652				1.67926	-0.114216
gene-VNG_2432C|VNG_2432C|VNG_2432C	VNG_2432C	VNG_RS09520	YbjQ family protein	VNG_RS09520		0.608361	-0.676572				0.340933	0.98807
gene-VNG_2433H|VNG_2433H|VNG_2433H	VNG_2433H	VNG_RS09525	hypothetical protein	VNG_RS09525		0.466906	0.358193				-1.12432	1.2771
gene-VNG_2436G|VNG_2436G|argH	VNG_2436G	VNG_RS09530	argininosuccinatelyase	argH		1.25806	1.51619				-1.434	1.21994
gene-VNG_2437G|VNG_2437G|argG	VNG_2437G	VNG_RS09535	argininosuccinatesynthase	VNG_RS09535		1.31372	0.779894		-0.353837		-0.611999	1.18989
gene-VNG_2439a|VNG_2439a|VNG_2439a	VNG_2439a					-0.618708	-0.263295				0.270543	-0.581887
gene-VNG_2439H|VNG_2439H|VNG_2439H	VNG_2439H	VNG_RS09540	hypothetical protein	VNG_RS09540		-0.171249						0.244084
gene-VNG_2440H|VNG_2440H|VNG_2440H	VNG_2440H	VNG_RS09545	2'-5' RNA ligase family protein	VNG_RS09545		-0.799281	0.894246				-0.910029	-0.739428
gene-VNG_2441G|VNG_2441G|rad3b	VNG_2441G	VNG_RS09550	ATP-dependentDNAhelicase	VNG_RS09550		-0.403508	-0.0406888				-0.006503	-0.312246
gene-VNG_2442H|VNG_2442H|VNG_2442H	VNG_2442H	VNG_RS14255	hypothetical protein	VNG_RS14255		2.82875	0.284192					0.411194
gene-VNG_2443G|VNG_2443G|dpsA	VNG_2443G	VNG_RS09555	DNAstarvation/stationaryphaseprotection protein	VNG_RS09555		-1.08326	-2.48667				0.853264	0.594212
gene-VNG_2444C|VNG_2444C|VNG_2444C	VNG_2444C	VNG_RS09560	metallophosphoesterase	VNG_RS09560			1.35819					-1.75592
gene-VNG_2445C|VNG_2445C|VNG_2445C	VNG_2445C	VNG_RS09565	helix-turn-helix transcriptionalregulator	VNG_RS09565		-1.42279	-2.02514				1.11854	-0.472123
gene-VNG_2446H|VNG_2446H|VNG_2446H	VNG_2446H					0.413713	1.26508					-0.662807
gene-VNG_2447G|VNG_2447G|ltaE	VNG_2447G	VNG_RS09570	lowspecificityl -threoninealdolase	VNG_RS09570		0.215774					-1.25997	1.74658
gene-VNG_2449G|VNG_2449G|pepB2	VNG_2449G	VNG_RS09575	aminopeptidase	VNG_RS09575		-1.66721	-1.08927				-0.0189631	-0.514908
gene-VNG_2451H|VNG_2451H|VNG_2451H	VNG_2451H	VNG_RS14000	hypothetical protein	VNG_RS14000
gene-VNG_2452C|VNG_2452C|VNG_2452C	VNG_2452C	VNG_RS09585	AAA family ATPase	VNG_RS09585		0.243788	2.31239					-0.710112
gene-VNG_2454C|VNG_2454C|VNG_2454C	VNG_2454C	VNG_RS09590	hypothetical protein	VNG_RS09590		1.15068	1.56765				-0.466422	0.0935243
gene-VNG_2455C|VNG_2455C|VNG_2455C	VNG_2455C	VNG_RS09595	hypothetical protein	VNG_RS09595		1.09724	1.32167				-0.281998	0.10164
gene-VNG_2456C|VNG_2456C|VNG_2456C	VNG_2456C	VNG_RS09600	magnesium transporter	VNG_RS09600		-1.01925						0.396087
gene-VNG_2458C|VNG_2458C|VNG_2458C	VNG_2458C	VNG_RS09605	magnesium transporter	VNG_RS09605		-1.01925	0.680121					-0.925841
gene-VNG_2459G|VNG_2459G|srp54	VNG_2459G	VNG_RS09610	signalrecognitionparticle protein	ffh		1.16579	0.316373				0.736862	0.156621
gene-VNG_2461H|VNG_2461H|VNG_2461H	VNG_2461H	VNG_RS09615	hypothetical protein	VNG_RS09615		1.82875						0.784652
gene-VNG_2462G|VNG_2462G|ftsY	VNG_2462G	VNG_RS09620	signalrecognitionparticle-docking protein FtsY	ftsY		1.13954	1.32782				-0.0375788	-0.106633
gene-VNG_2465C|VNG_2465C|pfdA	VNG_2465C	VNG_RS09625	prefoldinsubunitalpha	pfdA		0.866718	2.05452		-0.704159		-0.618425	-0.525303
gene-VNG_2466a|VNG_2466a|tif6	VNG_2466a					0.134	0.624979				-0.002475	-0.444435
gene-VNG_2466C|VNG_2466C|VNG_2466C	VNG_2466C	VNG_RS09630	translation initiation factor IF-6	VNG_RS09630
gene-VNG_2467G|VNG_2467G|rpl31e	VNG_2467G	VNG_RS09635	50Sribosomal protein L31e	VNG_RS09635		-0.114666	0.738127				-0.0879105	-0.720812
gene-VNG_2468C|VNG_2468C|VNG_2468C	VNG_2468C	VNG_RS09645	hypothetical protein	VNG_RS09645		2.08251	1.10821				0.614498	0.403864
gene-VNG_2469G|VNG_2469G|rpl39e	VNG_2469G	VNG_RS09640	50Sribosomal protein L39e	VNG_RS09640		-0.680924	0.731651				-0.492417	-0.876088
gene-VNG_2470C|VNG_2470C|VNG_2470C	VNG_2470C	VNG_RS09650	DUF424 family protein	VNG_RS09650		0.858498	2.05863				-1.14449	-0.0115709
gene-VNG_2471G|VNG_2471G|sufS	VNG_2471G	VNG_RS09655	cysteinedesulfurase	VNG_RS09655		2.95253	1.58236		1.58616		0.806596	0.60764
gene-VNG_2472G|VNG_2472G|iscU	VNG_2472G	VNG_RS09660	iron-sulfurclusterassemblyscaffold protein	VNG_RS09660		2.0722	0.377052				1.01597	0.723252
gene-VNG_2473G|VNG_2473G|radA	VNG_2473G	VNG_RS09665	DNA repairandrecombination protein RadA	radA		2.20957	2.35819		1.11523		0.571713	-0.676264
gene-VNG_2474C|VNG_2474C|VNG_2474C	VNG_2474C	VNG_RS09670	hypothetical protein	VNG_RS09670		1.31814	0.943155				-0.259971	0.679021
gene-VNG_2475a|VNG_2475a|VNG_2475a	VNG_2475a	VNG_RS09680	hypothetical protein	VNG_RS09680
gene-VNG_2475C|VNG_2475C|taw2	VNG_2475C	VNG_RS09675	classISAM-dependentmethyl transferase family protein	VNG_RS09675		1.52919	2.81762					0.485092
gene-VNG_2476C|VNG_2476C|VNG_2476C	VNG_2476C	VNG_RS09685	ATP-dependentDNAhelicase	VNG_RS09685		-0.936784	0.165548				-0.231957	-0.826305
gene-VNG_2477H|VNG_2477H|VNG_2477H	VNG_2477H	VNG_RS09690	hypothetical protein	VNG_RS09690
gene-VNG_2480H|VNG_2480H|phoU1	VNG_2480H	VNG_RS09695	phosphate uptake regulator PhoU	VNG_RS09695			-3.15638				2.85551
gene-VNG_2482G|VNG_2482G|pstB1	VNG_2482G	VNG_RS09700	phosphateABC transporter ATP-binding protein	pstB		-0.695911	-3.91979				3.09787	0.170083
gene-VNG_2483G|VNG_2483G|pstA1	VNG_2483G	VNG_RS09705	phosphateABC transporter permeasePstA	pstA		-0.766859	-3.43595				3.11677	-0.403614
gene-VNG_2484G|VNG_2484G|pstC1	VNG_2484G	VNG_RS09710	phosphateABC transporter permeasesubunitPstC	pstC		-0.811074	-3.11311				2.30512	0.0409921
gene-VNG_2486G|VNG_2486G|pstS1	VNG_2486G	VNG_RS09715	substrate-binding domain -containing protein	VNG_RS09715		-0.747178	-2.13498				1.90188	-0.470007
gene-VNG_2488C|VNG_2488C|VNG_2488C	VNG_2488C	VNG_RS09720	NAD(P)H-binding protein	VNG_RS09720		-0.668749	-0.449162				0.0778984	-0.253416
gene-VNG_2490a|VNG_2490a|VNG_2490a	VNG_2490a					-1.64073	-3.14431				0.773044	0.774599
gene-VNG_2490b|VNG_2490b|VNG_2490b	VNG_2490b	VNG_RS09730	hypothetical protein	VNG_RS09730			-3.22677				0.565999
gene-VNG_2490H|VNG_2490H|VNG_2490H	VNG_2490H	VNG_RS09725	hypothetical protein	VNG_RS09725		-0.00132442	-1.64181				1.0779	0.606654
gene-VNG_2493C|VNG_2493C|VNG_2493C	VNG_2493C	VNG_RS09735	PHP domain -containing protein	VNG_RS09735		1.39354	2.03626				-0.407528	-0.191131
gene-VNG_2495a|VNG_2495a|VNG_2495a	VNG_2495a					2.15068	0.0362648					-0.0189504
gene-VNG_2495H|VNG_2495H|VNG_2495H	VNG_2495H					0.413713	1.16555					-0.241343
gene-VNG_2496G|VNG_2496G|fer4	VNG_2496G	VNG_RS09740	ferredoxin family protein	VNG_RS09740		-0.29678	1.71574				-1.31442	-0.654036
gene-VNG_2497H|VNG_2497H|VNG_2497H	VNG_2497H	VNG_RS09745	cupin domain -containing protein	VNG_RS09745		1.92561	1.71574					0.568356
gene-VNG_2498H|VNG_2498H|VNG_2498H	VNG_2498H	VNG_RS09750	DUF393 domain -containing protein	VNG_RS09750		1.31814	0.643595				0.155066	0.563544
gene-VNG_2499G|VNG_2499G|acd6	VNG_2499G	VNG_RS09755	acyl -CoAdehydrogenase family protein	VNG_RS09755		-1.41035	-0.909029		1.36681		0.445705	-0.902957
gene-VNG_2501C|VNG_2501C|guaAa2	VNG_2501C	VNG_RS09760	gamma-glutamyl -gamma-aminobutyratehydrolase family protein	VNG_RS09760
gene-VNG_2502C|VNG_2502C|VNG_2502C	VNG_2502C	VNG_RS09765	HD domain -containing protein	VNG_RS09765
gene-VNG_2504G|VNG_2504G|pheS	VNG_2504G	VNG_RS09770	phenyl alanine--tRNAligasesubunitalpha	VNG_RS09770		0.944228	1.011				0.238835	-0.261535
gene-VNG_2505G|VNG_2505G|pheT	VNG_2505G	VNG_RS09775	phenyl alanine--tRNAligasesubunitbeta	VNG_RS09775		1.10714	1.29816				0.169615	-0.316563
gene-VNG_2507G|VNG_2507G|pyrD	VNG_2507G	VNG_RS09780	quinone-dependentdihydroorotatedehydrogenase	VNG_RS09780		0.165786	1.78446				-1.39242	-0.182181
gene-VNG_2508C|VNG_2508C|VNG_2508C	VNG_2508C	VNG_RS09785	non-histonechromosomalMC1 family protein	VNG_RS09785		-1.42582	-1.22382				0.113818	-0.271754
gene-VNG_2509H|VNG_2509H|VNG_2509H	VNG_2509H	VNG_RS09815	hypothetical protein	VNG_RS09815		-0.913753	0.342073				-0.0955844	-1.11617
gene-VNG_2510H|VNG_2510H|VNG_2510H	VNG_2510H	VNG_RS09820	hypothetical protein	VNG_RS09820		0.453241	3.81762				-2.72946	-0.590857
gene-VNG_2511H|VNG_2511H|VNG_2511H	VNG_2511H					2.41371						1.65912
gene-VNG_2512G|VNG_2512G|VNG_2512G	VNG_2512G	VNG_RS09830	MBLfoldmetallo-hydrolase	VNG_RS09830		1.17453	0.817625				-0.144494	0.545465
gene-VNG_2513G|VNG_2513G|aldH1	VNG_2513G	VNG_RS09835	aldehydedehydrogenase family protein	VNG_RS09835		1.59072	0.361725				0.0933031	1.17977
gene-VNG_2514G|VNG_2514G|rps6e	VNG_2514G	VNG_RS09840	30Sribosomal protein S6e	VNG_RS09840		1.75075	1.71574				-0.392422	0.471494
gene-VNG_2515H|VNG_2515H|VNG_2515H	VNG_2515H	VNG_RS09845	hypothetical protein	VNG_RS09845		0.0131752	2.88175				-2.60393	-0.220584
gene-VNG_2516C|VNG_2516C|VNG_2516C	VNG_2516C	VNG_RS09850	carbohydratekinase family protein	VNG_RS09850		0.52919						0.774599
gene-VNG_2518C|VNG_2518C|VNG_2518C	VNG_2518C	VNG_RS09855	BtpA/SgcQ family protein	VNG_RS09855		1.06579	1.02116					0.455588
gene-VNG_2519H|VNG_2519H|VNG_2519H	VNG_2519H	VNG_RS09860	hypothetical protein	VNG_RS09860		1.0214	0.641127				-0.366886	0.791225
gene-VNG_2520C|VNG_2520C|VNG_2520C	VNG_2520C	VNG_RS09865	universalstress protein	VNG_RS09865		-0.345279	-0.127234				-0.211608	0.0376331
gene-VNG_2521H|VNG_2521H|VNG_2521H	VNG_2521H	VNG_RS09870	universalstress protein	VNG_RS09870		-0.267925	-0.296672				0.310072	-0.237256
gene-VNG_2522C|VNG_2522C|VNG_2522C	VNG_2522C	VNG_RS09875	GNAT family N-acetyl transferase	VNG_RS09875		-1.57461	-0.604332				-0.254118	-0.672084
gene-VNG_2523H|VNG_2523H|VNG_2523H	VNG_2523H	VNG_RS09880	universalstress protein	VNG_RS09880		-1.80868	-1.47188				0.0481511	-0.340879
gene-VNG_2524H|VNG_2524H|VNG_2524H	VNG_2524H	VNG_RS09885	hypothetical protein	VNG_RS09885		1.22107	1.11308					-0.703449
gene-VNG_2525H|VNG_2525H|VNG_2525H	VNG_2525H	VNG_RS09890	hypothetical protein	VNG_RS09890		-0.220159	1.16555				0.408047	-1.74968
gene-VNG_2526G|VNG_2526G|dppDF2	VNG_2526G	VNG_RS09895	dipeptideABC transporter ATP-binding protein	VNG_RS09895		-0.429782	0.297932				0.636866	-1.32051
gene-VNG_2527G|VNG_2527G|dppA2	VNG_2527G	VNG_RS09900	ABC transporter substrate-binding protein	VNG_RS09900		-0.572734	0.0637851				0.476564	-1.06901
gene-VNG_2529G|VNG_2529G|dppB2	VNG_2529G	VNG_RS09905	ABC transporter permease	VNG_RS09905		0.243788	0.123728				0.886203	-0.722073
gene-VNG_2531G|VNG_2531G|dppC2	VNG_2531G	VNG_RS09910	ABC transporter permease	VNG_RS09910		-0.0697114	-0.12828				1.37907	-1.27643
gene-VNG_2532H|VNG_2532H|VNG_2532H	VNG_2532H	VNG_RS09915	hypothetical protein	VNG_RS09915		-0.668749	-0.319879				-0.144494	-0.160306
gene-VNG_2533G|VNG_2533G|pyrC	VNG_2533G	VNG_RS09920	dihydroorotase	VNG_RS09920		1.23474	1.5102		-0.894054		-0.296497	0.0651139
gene-VNG_2534C|VNG_2534C|VNG_2534C	VNG_2534C	VNG_RS09930	hypothetical protein	VNG_RS09930		0.76735						0.0127585
[truncated: 1,678 more rows]

## Sheet: S1c. RNA-seq
Antisense RNAs identified in by de Almeida et al. (2019)					# replicates	S1	S2	S4	S5		S1	S2	S4	S5
Insertion sequences						NRC-1_2.6-1	NRC-1_4.3-1	NRC-1_2.6-2	NRC-1_4.3-2		NRC-1_2.6-1	NRC-1_4.3-1	NRC-1_2.6-2	NRC-1_4.3-2		cutoff min count is 10
New transcripts						L	O	L	O		L	O	L	O		m		NOT yet normalized between replicates
					total	655386	675846	598622	541874		1	1	1	1		1.47963e-05
					gene-VNG_r02|VNG_r02|rrs	36803	69211	48729	69743		0.0561547	0.102406	0.081402	0.128707
					gene-VNG_r03|VNG_r03|rrlA	86742	230406	114504	214557		0.132353	0.340915	0.191279	0.395954			Replicate 1		Replicate 2		Self-self O vs O		Self-self L vs L
ID	locus	locus NCBI	NCBI_product	NCBI_gene_name	23S rRNA / total	0.132353	0.340915	0.191279	0.395954							max(L,O) > m	log2(L/O)	max(L,O) > m	log2(L/O)	max(O1,O2) > m	log2(O2/O1)	max(L1,L2) > m	log2(L1/L2)
gene-VNG_0001H|VNG_0001H|VNG_0001H	VNG_0001H	VNG_RS00010	hypothetical protein	VNG_RS00010		166	138	217	110		0.000253286	0.000204189	0.000362499	0.000202999		1	0.310865	1	0.836504	1	-0.00842762	1	-0.517211
gene-VNG_0002G|VNG_0002G|VNG_0002G	VNG_0002G	VNG_RS00015	ABC transporter ATP-binding protein	VNG_RS00015		82	58	111	48		0.000125117	8.58184e-05	0.000185426	8.85815e-05		1	0.543921	1	1.06577	1	0.0457186	1	-0.567563
gene-VNG_0003C|VNG_0003C|VNG_0003C	VNG_0003C	VNG_RS00020	ABC transporter permease	VNG_RS00020		86	72	151	84		0.00013122	0.000106533	0.000252246	0.000155018		1	0.300689	1	0.702399	1	0.54113	1	-0.94284
gene-VNG_0005H|VNG_0005H|VNG_0005H	VNG_0005H	VNG_RS00025	hypothetical protein	VNG_RS00025		39	49	93	25		5.95069e-05	7.25017e-05	0.000155357	4.61362e-05		1	-0.284958	1	1.75161	1	-0.652117	1	-1.38446
gene-VNG_0006G|VNG_0006G|glmS	VNG_0006G	VNG_RS00030	glutamine--fructose-6-phosphate transaminase(isomerizing)	glmS		358	191	310	107		0.000546243	0.000282609	0.000517856	0.000197463		1	0.950737	1	1.39097	1	-0.517225	1	0.0769918
gene-VNG_0008G|VNG_0008G|graD5	VNG_0008G	VNG_RS00035	NTP transferase domain -containing protein	VNG_RS00035		117	93	107	40		0.000178521	0.000137605	0.000178744	7.38179e-05		1	0.375556	1	1.27585	1	-0.898494	1	-0.00180182
gene-VNG_0009G|VNG_0009G|graD2	VNG_0009G	VNG_RS00040	NTP transferase domain -containing protein	VNG_RS00040		73	18	74	9		0.000111385	2.66333e-05	0.000123617	1.6609e-05		1	2.06425	1	2.89584	1	-0.681263	1	-0.150328
gene-VNG_0011C|VNG_0011C|VNG_0011C	VNG_0011C	VNG_RS00045	sugar transferase	VNG_RS00045		91	17	145	7		0.000138849	2.51537e-05	0.000242223	1.29181e-05		1	2.46468	1	4.22887	1	-0.961371	1	-0.802814
gene-VNG_0015H|VNG_0015H|VNG_0015H	VNG_0015H	VNG_RS00055	hypothetical protein	VNG_RS00055		12	4	6	3		1.83098e-05	5.91851e-06	1.0023e-05	5.53634e-06		1	1.62931	0		0		1	0.8693
gene-VNG_0016H|VNG_0016H|VNG_0016H	VNG_0016H	VNG_RS00060	MarR family transcriptional regulator	VNG_RS00060		20	8	13	5		3.05164e-05	1.1837e-05	2.17165e-05	9.22724e-06		1	1.36628	1	1.23482	0		1	0.490789
gene-VNG_0019H|VNG_0019H|VNG_0019H	VNG_0019H					41	29	53	16		6.25586e-05	4.29092e-05	8.85367e-05	2.95272e-05		1	0.543921	1	1.58423	1	-0.539244	1	-0.501068
gene-VNG_0020H|VNG_0020H|VNG_0020H	VNG_0020H	VNG_RS00075	hypothetical protein	VNG_RS00075		2	0	1	0		3.05164e-06	0	1.6705e-06	0		0		0		0		0
gene-VNG_0022H|VNG_0022H|VNG_0022H	VNG_0022H	VNG_RS00085	hypothetical protein	VNG_RS00085		5	0	3	1		7.62909e-06	0	5.01151e-06	1.84545e-06		0		0		0		0
gene-VNG_0023H|VNG_0023H|VNG_0023H	VNG_0023H	VNG_RS00090	hypothetical protein	VNG_RS00090		7	0	10	2		1.06807e-05	0	1.6705e-05	3.69089e-06		0		1	2.17824	0		1	-0.645273
gene-VNG_0024H|VNG_0024H|VNG_0024H	VNG_0024H	VNG_RS00095	hypothetical protein	VNG_RS00095		12	0	3	1		1.83098e-05	0	5.01151e-06	1.84545e-06		1	#DIV/0!	0		0		1	1.8693
gene-VNG_0025H|VNG_0025H|VNG_0025H	VNG_0025H	VNG_RS00100	hypothetical protein	VNG_RS00100		42	16	69	12		6.40844e-05	2.3674e-05	0.000115265	2.21454e-05		1	1.43667	1	2.37987	1	-0.0963004	1	-0.846907
gene-VNG_0027H|VNG_0027H|VNG_0027H	VNG_0027H	VNG_RS13175	hypothetical protein	VNG_RS13175		3	1	7	2		4.57746e-06	1.47963e-06	1.16935e-05	3.69089e-06		0		0		0		0
gene-VNG_0029a|VNG_0029a|VNG_0029a	VNG_0029a					1	0	1	0		1.52582e-06	0	1.6705e-06	0		0		0		0		0
gene-VNG_0029H|VNG_0029H|VNG_0029H	VNG_0029H	VNG_RS13180	hypothetical protein	VNG_RS13180		0	0	0	1		0	0	0	1.84545e-06		0		0		0		0
gene-VNG_0030H|VNG_0030H|VNG_0030H	VNG_0030H	VNG_RS13185	hypothetical protein	VNG_RS13185		5	3	7	2		7.62909e-06	4.43888e-06	1.16935e-05	3.69089e-06		0		0		0		0
gene-VNG_0031H|VNG_0031H|VNG_0031H	VNG_0031H	VNG_RS00115	hypothetical protein	VNG_RS00115		57	10	84	15		8.69716e-05	1.47963e-05	0.000140322	2.76817e-05		1	2.55531	1	2.34174	1	0.9037	1	-0.690127
gene-VNG_0032H|VNG_0032H|VNG_0032H	VNG_0032H	VNG_RS13190	hypothetical protein	VNG_RS13190		21	2	25	4		3.20422e-05	2.95925e-06	4.17626e-05	7.38179e-06		1	3.43667	1	2.50017	0		1	-0.382238
gene-VNG_0033H|VNG_0033H|VNG_0033H	VNG_0033H	VNG_RS13195	hypothetical protein	VNG_RS13195		2	1	3	0		3.05164e-06	1.47963e-06	5.01151e-06	0		0		0		0		0
gene-VNG_0037H|VNG_0037H|VNG_0037H	VNG_0037H	VNG_RS00135	typeII toxin-antitoxin system HicB family antitoxin	VNG_RS00135		134	75	82	40		0.00020446	0.000110972	0.000136981	7.38179e-05		1	0.88162	1	0.891936	1	-0.588153	1	0.577838
gene-VNG_0038H|VNG_0038H|VNG_0038H	VNG_0038H	VNG_RS00140	typeII toxin-antitoxin system HicA family toxin	VNG_RS00140		86	31	54	16		0.00013122	4.58684e-05	9.02072e-05	2.95272e-05		1	1.51642	1	1.6112	1	-0.635459	1	0.540678
gene-VNG_0039H|VNG_0039H|VNG_0039H	VNG_0039H	VNG_RS00145	MarR family transcriptional regulator	VNG_RS00145		37	21	33	13		5.64553e-05	3.10722e-05	5.51266e-05	2.39908e-05		1	0.861486	1	1.20027	1	-0.373141	1	0.0343597
gene-VNG_0040C|VNG_0040C|VNG_0040C	VNG_0040C	VNG_RS00150	transcriptional regulator	VNG_RS00150		55	56	56	43		8.392e-05	8.28591e-05	9.35482e-05	7.93542e-05		1	0.0183545	1	0.237402	1	-0.062353	1	-0.156695
gene-VNG_0041C|VNG_0041C|VNG_0041C	VNG_0041C	VNG_RS00155	hypothetical protein	VNG_RS00155		71	63	46	36		0.000108333	9.32165e-05	7.68431e-05	6.64361e-05		1	0.216817	1	0.209949	1	-0.488618	1	0.495486
gene-VNG_0045C|VNG_0045C|orc9	VNG_0045C	VNG_RS00175	AAA family ATPase	VNG_RS00175		21	9	26	6		3.20422e-05	1.33166e-05	4.34331e-05	1.10727e-05		1	1.26674	1	1.97179	0		1	-0.438822
gene-VNG_0046G|VNG_0046G|aglM2	VNG_0046G	VNG_RS00180	UDP-glucose/GDP-mannosedehydrogenase family protein	VNG_RS00180		60	22	74	28		9.15491e-05	3.25518e-05	0.000123617	5.16725e-05		1	1.49181	1	1.25841	1	0.66666	1	-0.433262
gene-VNG_0047G|VNG_0047G|aglF1	VNG_0047G	VNG_RS00185	sugarnucleotidyl transferase	VNG_RS00185		48	8	52	14		7.32393e-05	1.1837e-05	8.68662e-05	2.58363e-05		1	2.62931	1	1.7494	1	1.12609	1	-0.246177
gene-VNG_0049H|VNG_0049H|VNG_0049H	VNG_0049H	VNG_RS13205	FkbM family methyl transferase	VNG_RS13205		6	4	21	5		9.15491e-06	5.91851e-06	3.50806e-05	9.22724e-06		0		1	1.9267	0		1	-1.93805
gene-VNG_0050C|VNG_0050C|VNG_0050C	VNG_0050C	VNG_RS13210	lipopolysaccharide biosynthesis protein	VNG_RS13210		2	1	6	1		3.05164e-06	1.47963e-06	1.0023e-05	1.84545e-06		0		0		0		0
gene-VNG_0051G|VNG_0051G|gth6	VNG_0051G	VNG_RS00195	glycosyl transferase family 4 protein	VNG_RS00195		27	40	26	19		4.11971e-05	5.91851e-05	4.34331e-05	3.50635e-05		1	-0.522691	1	0.308824	1	-0.755263	1	-0.0762518
gene-VNG_0054H|VNG_0054H|VNG_0054H	VNG_0054H	VNG_RS00215	hypothetical protein	VNG_RS00215		3	0	0	0		4.57746e-06	0	0	0		0		0		0		0
gene-VNG_0055H|VNG_0055H|VNG_0055H	VNG_0055H	VNG_RS13215	hypothetical protein	VNG_RS13215		1	0	1	0		1.52582e-06	0	1.6705e-06	0		0		0		0		0
gene-VNG_0056a|VNG_0056a|VNG_0056a	VNG_0056a					6	2	10	0		9.15491e-06	2.95925e-06	1.6705e-05	0		0		1	#DIV/0!	0		1	-0.867665
gene-VNG_0057H|VNG_0057H|VNG_0057H	VNG_0057H	VNG_RS00235	hypothetical protein	VNG_RS00235		3	4	5	3		4.57746e-06	5.91851e-06	8.35252e-06	5.53634e-06		0		0		0		0
gene-VNG_0058H|VNG_0058H|VNG_0058H	VNG_0058H	VNG_RS00240	hypothetical protein	VNG_RS00240		12	28	18	9		1.83098e-05	4.14296e-05	3.00691e-05	1.6609e-05		1	-1.17804	1	0.856312	1	-1.31869	1	-0.715662
gene-VNG_0060G|VNG_0060G|gth4	VNG_0060G	VNG_RS13220	glycosyl transferase family 4 protein	VNG_RS13220		34	24	45	11		5.18778e-05	3.5511e-05	7.51726e-05	2.02999e-05		1	0.54685	1	1.88873	1	-0.806794	1	-0.53509
gene-VNG_0061C|VNG_0061C|VNG_0061C	VNG_0061C	VNG_RS00250	sulfatase-likehydrolase/ transferase	VNG_RS00250		23	13	17	8		3.50938e-05	1.92352e-05	2.83986e-05	1.47636e-05		1	0.867472	1	0.943775	1	-0.381703	1	0.3054
gene-VNG_0062G|VNG_0062G|gth5	VNG_0062G	VNG_RS00255	glycosyl transferase family 4 protein	VNG_RS00255		15	5	17	5		2.28873e-05	7.39814e-06	2.83986e-05	9.22724e-06		1	1.62931	1	1.62185	0		1	-0.311272
gene-VNG_0063G|VNG_0063G|VNG_0063G	VNG_0063G	VNG_RS00260	SDR family oxidoreductase	VNG_RS00260		9	14	18	4		1.37324e-05	2.07148e-05	3.00691e-05	7.38179e-06		1	-0.59308	1	2.02624	1	-1.48862	1	-1.1307
gene-VNG_0064G|VNG_0064G|graD3	VNG_0064G	VNG_RS00265	sugarnucleotidyl transferase	VNG_RS00265		18	9	16	1		2.74647e-05	1.33166e-05	2.67281e-05	1.84545e-06		1	1.04435	1	3.85631	0		1	0.0392254
gene-VNG_0065G|VNG_0065G|VNG_0065G	VNG_0065G	VNG_RS00270	SDR family oxidoreductase	VNG_RS00270		16	8	17	3		2.44131e-05	1.1837e-05	2.83986e-05	5.53634e-06		1	1.04435	1	2.35881	0		1	-0.218162
gene-VNG_0066H|VNG_0066H|VNG_0066H	VNG_0066H	VNG_RS00275	UPF0175 family protein	VNG_RS00275		58	46	40	30		8.84975e-05	6.80628e-05	6.68201e-05	5.53634e-05		1	0.378769	1	0.27135	1	-0.297934	1	0.405353
gene-VNG_0069H|VNG_0069H|VNG_0069H	VNG_0069H	VNG_RS13225	hypothetical protein	VNG_RS13225		155	52	79	31		0.000236502	7.69406e-05	0.00013197	5.72089e-05		1	1.62003	1	1.2059	1	-0.427506	1	0.841644
gene-VNG_0070H|VNG_0070H|VNG_0070H	VNG_0070H	VNG_RS00290	plasmidstabilization protein	VNG_RS00290		179	42	86	37		0.000273121	6.21443e-05	0.000143663	6.82816e-05		1	2.13585	1	1.07312	1	0.135873	1	0.926851
gene-VNG_0072a|VNG_0072a|VNG_0072a	VNG_0072a					8	5	12	0		1.22065e-05	7.39814e-06	2.0046e-05	0		0		1	#DIV/0!	0		1	-0.715662
gene-VNG_0072H|VNG_0072H|VNG_0072H	VNG_0072H	VNG_RS00295	typeIItoxin-antitoxinsystemVapC family toxin	VNG_RS00295		12	5	16	2		1.83098e-05	7.39814e-06	2.67281e-05	3.69089e-06		1	1.30738	1	2.85631	0		1	-0.545737
gene-VNG_0076H|VNG_0076H|VNG_0076H	VNG_0076H					0	0	0	0		0	0	0	0		0		0		0		0
gene-VNG_0077a|VNG_0077a|VNG_0077a	VNG_0077a					21	6	35	6		3.20422e-05	8.87776e-06	5.84676e-05	1.10727e-05		1	1.8517	1	2.40063	0		1	-0.867665
gene-VNG_0077H|VNG_0077H|VNG_0077H	VNG_0077H	VNG_RS00315	DUF4330 family protein	VNG_RS00315		53	26	88	22		8.08684e-05	3.84703e-05	0.000147004	4.05998e-05		1	1.07183	1	1.85631	1	0.077729	1	-0.862211
gene-VNG_0079H|VNG_0079H|VNG_0079H	VNG_0079H					1	1	0	0		1.52582e-06	1.47963e-06	0	0		0		0		0		0
gene-VNG_0080H|VNG_0080H|VNG_0080H	VNG_0080H	VNG_RS00325	VanZ family protein	vanZ		5	4	11	1		7.62909e-06	5.91851e-06	1.83755e-05	1.84545e-06		0		1	3.31574	0		1	-1.2682
gene-VNG_0081G|VNG_0081G|moaE	VNG_0081G	VNG_RS00330	molybdopterin synthase	VNG_RS00330		27	9	12	5		4.11971e-05	1.33166e-05	2.0046e-05	9.22724e-06		1	1.62931	1	1.11935	0		1	1.03923
gene-VNG_0084G|VNG_0084G|ubaA	VNG_0084G	VNG_RS00335	molybdopterin-synthaseadenyl transferaseMoeB	moeB		17	5	11	3		2.59389e-05	7.39814e-06	1.83755e-05	5.53634e-06		1	1.80988	1	1.73078	0		1	0.497332
gene-VNG_0085G|VNG_0085G|moaA	VNG_0085G	VNG_RS00340	GTP3',8-cyclase MoaA	moaA		44	16	39	11		6.7136e-05	2.3674e-05	6.51496e-05	2.02999e-05		1	1.50378	1	1.68228	1	-0.221831	1	0.0433298
gene-VNG_0086G|VNG_0086G|moeA2	VNG_0086G	VNG_RS00345	molybdopterin biosynthesis protein	VNG_RS00345		99	31	52	14		0.000151056	4.58684e-05	8.68662e-05	2.58363e-05		1	1.71951	1	1.7494	1	-0.828104	1	0.798217
gene-VNG_0089G|VNG_0089G|pimT1	VNG_0089G	VNG_RS00355	protein -L-isoaspartate O-methyl transferase	VNG_RS00355		54	14	32	7		8.23942e-05	2.07148e-05	5.34561e-05	1.29181e-05		1	1.99188	1	2.04896	1	-0.681263	1	0.624188
gene-VNG_0090G|VNG_0090G|moeA1	VNG_0090G	VNG_RS00350	molybdopterin molybdo transferase MoeA	VNG_RS00350		94	35	32	7		0.000143427	5.17869e-05	5.34561e-05	1.29181e-05		1	1.46966	1	2.04896	1	-2.00319	1	1.42389
gene-VNG_0091C|VNG_0091C|VNG_0091C	VNG_0091C	VNG_RS00360	hypothetical protein	VNG_RS00360		17	0	3	1		2.59389e-05	0	5.01151e-06	1.84545e-06		1	#DIV/0!	0		0		1	2.3718
gene-VNG_0094C|VNG_0094C|VNG_0094C	VNG_0094C	VNG_RS00365	hypothetical protein	VNG_RS00365		249	52	132	37		0.000379929	7.69406e-05	0.000220506	6.82816e-05		1	2.30391	1	1.69125	1	-0.172249	1	0.784908
gene-VNG_0095G|VNG_0095G|gap	VNG_0095G	VNG_RS00375	typeII glyceraldehyde-3-phosphate dehydrogenase	VNG_RS00375		255	46	321	16		0.000389084	6.80628e-05	0.000536232	2.95272e-05		1	2.51514	1	4.18274	1	-1.20482	1	-0.462776
gene-VNG_0096C|VNG_0096C|pepB4	VNG_0096C	VNG_RS00370	aminopeptidase	VNG_RS00370		266	93	115	35		0.000405868	0.000137605	0.000192108	6.45907e-05		1	1.56047	1	1.57252	1	-1.09114	1	1.07909
gene-VNG_0097G|VNG_0097G|hsp20A	VNG_0097G	VNG_RS00380	Hsp20/alphacrystallin family protein	VNG_RS00380		152	31	123	18		0.000231924	4.58684e-05	0.000205472	3.32181e-05		1	2.33808	1	2.6289	1	-0.465534	1	0.174713
gene-VNG_0098G|VNG_0098G|VNG_0098G	VNG_0098G	VNG_RS00385	RimK family alpha-L-glutamateligase	VNG_RS00385		37	4	31	5		5.64553e-05	5.91851e-06	5.17856e-05	9.22724e-06		1	3.2538	1	2.48858	0		1	0.124558
gene-VNG_0099G|VNG_0099G|rpl16	VNG_0099G	VNG_RS00390	50Sribosomal protein L16	VNG_RS00390		226	181	267	48		0.000344835	0.000267812	0.000446024	8.85815e-05		1	0.364683	1	2.33205	1	-1.59615	1	-0.371217
gene-VNG_0101G|VNG_0101G|cspA1	VNG_0101G	VNG_RS00395	cold-shock protein	VNG_RS00395		364	112	444	62		0.000555398	0.000165718	0.000741703	0.000114418		1	1.74479	1	2.69653	1	-0.534421	1	-0.417321
gene-VNG_0102C|VNG_0102C|VNG_0102C	VNG_0102C	VNG_RS00400	HAD family hydrolase	VNG_RS00400		123	52	95	44		0.000187676	7.69406e-05	0.000158698	8.11997e-05		1	1.28642	1	0.966736	1	0.077729	1	0.241959
gene-VNG_0104G|VNG_0104G|serA3	VNG_0104G	VNG_RS00405	C-terminal binding protein	VNG_RS00405		67	52	44	19		0.00010223	7.69406e-05	7.35021e-05	3.50635e-05		1	0.409999	1	1.06782	1	-1.13378	1	0.475958
gene-VNG_0105H|VNG_0105H|VNG_0105H	VNG_0105H	VNG_RS00410	hypothetical protein	VNG_RS00410		25	8	12	7		3.81455e-05	1.1837e-05	2.0046e-05	1.29181e-05		1	1.68821	1	0.63392	0		1	0.928194
gene-VNG_0106G|VNG_0106G|rmeM	VNG_0106G	VNG_RS00415	SAM-dependent DNA methyl transferase	VNG_RS00415		60	36	67	17		9.15491e-05	5.32666e-05	0.000111924	3.13726e-05		1	0.781315	1	1.83494	1	-0.763725	1	-0.289898
gene-VNG_0107G|VNG_0107G|rmeS	VNG_0107G	VNG_RS00420	restriction endonuclease subunitS	VNG_RS00420		48	19	68	19		7.32393e-05	2.81129e-05	0.000113594	3.50635e-05		1	1.38138	1	1.69585	1	0.318737	1	-0.6332
gene-VNG_0108G|VNG_0108G|rmeR	VNG_0108G	VNG_RS00425	typeIrestriction endonuclease subunitR	VNG_RS00425		89	26	99	22		0.000135798	3.84703e-05	0.00016538	4.05998e-05		1	1.81964	1	2.02624	1	0.077729	1	-0.284323
gene-VNG_0110a|VNG_0110a|VNG_0110a	VNG_0110a					1	0	2	0		1.52582e-06	0	3.34101e-06	0		0		0		0		0
gene-VNG_0110C|VNG_0110C|VNG_0110C	VNG_0110C	VNG_RS00430	M48 family metallopeptidase	VNG_RS00430		24	10	27	7		3.66196e-05	1.47963e-05	4.51036e-05	1.29181e-05		1	1.30738	1	1.80384	1	-0.195836	1	-0.300625
gene-VNG_0113H|VNG_0113H|VNG_0113H	VNG_0113H	VNG_RS00450	helix-turn-helix domain -containing protein	VNG_RS00450		20	4	8	3		3.05164e-05	5.91851e-06	1.3364e-05	5.53634e-06		1	2.36628	0		0		1	1.19123
gene-VNG_0115G|VNG_0115G|VNG_0115G	VNG_0115G	VNG_RS00455	SDR family oxidoreductase	VNG_RS00455		62	30	24	14		9.46007e-05	4.43888e-05	4.00921e-05	2.58363e-05		1	1.09166	1	0.63392	1	-0.780799	1	1.23853
gene-VNG_0116a|VNG_0116a|VNG_0116a	VNG_0116a					2	0	0	0		3.05164e-06	0	0	0		0		0		0		0
gene-VNG_0116H|VNG_0116H|VNG_0116H	VNG_0116H	VNG_RS00470	hypothetical protein	VNG_RS00470		9	2	7	1		1.37324e-05	2.95925e-06	1.16935e-05	1.84545e-06		0		0		0		0
gene-VNG_0117H|VNG_0117H|VNG_0117H	VNG_0117H	VNG_RS00480	hypothetical protein	VNG_RS00480		5	0	1	0		7.62909e-06	0	1.6705e-06	0		0		0		0		0
gene-VNG_0118H|VNG_0118H|VNG_0118H	VNG_0118H	VNG_RS00485	hypothetical protein	VNG_RS00485		13	1	6	0		1.98356e-05	1.47963e-06	1.0023e-05	0		1	3.74479	0		0		1	0.984778
gene-VNG_0119H|VNG_0119H|VNG_0119H	VNG_0119H	VNG_RS14155	hypothetical protein	VNG_RS14155		10	7	8	6		1.52582e-05	1.03574e-05	1.3364e-05	1.10727e-05		1	0.558923	0		0		1	0.191229
gene-VNG_0120H|VNG_0120H|VNG_0120H	VNG_0120H					4	0	10	1		6.10327e-06	0	1.6705e-05	1.84545e-06		0		1	3.17824	0		1	-1.45263
gene-VNG_0121H|VNG_0121H|VNG_0121H	VNG_0121H	VNG_RS00495	DUF192 domain -containing protein	VNG_RS00495		26	7	7	6		3.96713e-05	1.03574e-05	1.16935e-05	1.10727e-05		1	1.93743	0		0		1	1.76239
gene-VNG_0123G|VNG_0123G|VNG_0123G	VNG_0123G	VNG_RS00500	ABC transporter ATP-binding protein	VNG_RS00500		96	54	77	41		0.000146479	7.98999e-05	0.000128629	7.56633e-05		1	0.874425	1	0.765547	1	-0.0785984	1	0.187476
gene-VNG_0124C|VNG_0124C|cre1	VNG_0124C	VNG_RS00505	creatininase family protein	VNG_RS00505		49	18	54	14		7.47651e-05	2.66333e-05	9.02072e-05	2.58363e-05		1	1.48913	1	1.80384	1	-0.043833	1	-0.270877
gene-VNG_0125H|VNG_0125H|VNG_0125H	VNG_0125H	VNG_RS00510	hypothetical protein	VNG_RS00510		13	15	20	12		1.98356e-05	2.21944e-05	3.34101e-05	2.21454e-05		1	-0.162101	1	0.593278	1	-0.00319097	1	-0.752188
gene-VNG_0127C|VNG_0127C|mptD	VNG_0127C	VNG_RS00515	dihydroneopterinaldolase family protein	VNG_RS00515		20	6	19	1		3.05164e-05	8.87776e-06	3.17396e-05	1.84545e-06		1	1.78132	1	4.10424	0		1	-0.056699
gene-VNG_0128C|VNG_0128C|azf	VNG_0128C	VNG_RS00520	NAD(P)-dependentoxidoreductase	VNG_RS00520		30	14	42	7		4.57746e-05	2.07148e-05	7.01611e-05	1.29181e-05		1	1.14389	1	2.44127	1	-0.681263	1	-0.616126
gene-VNG_0129G|VNG_0129G|htpX	VNG_0129G	VNG_RS00525	M48 family metalloprotease	VNG_RS00525		201	133	171	60		0.000306689	0.00019679	0.000285656	0.000110727		1	0.640119	1	1.36727	1	-0.829655	1	0.1025
gene-VNG_0130H|VNG_0130H|VNG_0130H	VNG_0130H	VNG_RS00530	hypothetical protein	VNG_RS00530		16	19	21	13		2.44131e-05	2.81129e-05	3.50806e-05	2.39908e-05		1	-0.203578	1	0.54819	1	-0.228751	1	-0.523017
gene-VNG_0132C|VNG_0132C|VNG_0132C	VNG_0132C	VNG_RS00535	hypothetical protein	VNG_RS00535		35	17	23	5		5.34036e-05	2.51537e-05	3.84216e-05	9.22724e-06		1	1.08617	1	2.05795	1	-1.4468	1	0.475022
gene-VNG_0133G|VNG_0133G|rpa2	VNG_0133G	VNG_RS00545	single-strandedDNAbinding protein	VNG_RS00545		121	43	107	15		0.000184624	6.3624e-05	0.000178744	2.76817e-05		1	1.53695	1	2.69089	1	-1.20064	1	0.0466967
gene-VNG_0134G|VNG_0134G|hstA	VNG_0134G	VNG_RS00550	histone family protein	VNG_RS00550		48	21	31	11		7.32393e-05	3.10722e-05	5.17856e-05	2.02999e-05		1	1.23699	1	1.35108	1	-0.614149	1	0.500067
gene-VNG_0136G|VNG_0136G|hda1	VNG_0136G	VNG_RS00555	histonedeacetyl ase	VNG_RS00555		100	55	97	39		0.000152582	8.13795e-05	0.000162039	7.19725e-05		1	0.906846	1	1.17082	1	-0.17722	1	-0.0867562
gene-VNG_0137a|VNG_0137a|VNG_0137a	VNG_0137a					4	1	8	0		6.10327e-06	1.47963e-06	1.3364e-05	0		0		0		0		0
gene-VNG_0137G|VNG_0137G|cca	VNG_0137G	VNG_RS00560	CCAtRNAnucleotidyl transferase	VNG_RS00560		66	16	41	14		0.000100704	2.3674e-05	6.84906e-05	2.58363e-05		1	2.08874	1	1.40651	1	0.126092	1	0.556143
gene-VNG_0139H|VNG_0139H|VNG_0139H	VNG_0139H	VNG_RS13245	hypothetical protein	VNG_RS13245		2	4	7	0		3.05164e-06	5.91851e-06	1.16935e-05	0		0		0		0		0
gene-VNG_0141H|VNG_0141H|VNG_0141H	VNG_0141H	VNG_RS00585	hypothetical protein	VNG_RS00585		10	7	5	8		1.52582e-05	1.03574e-05	8.35252e-06	1.47636e-05		1	0.558923	0		0		1	0.8693
gene-VNG_0142C|VNG_0142C|VNG_0142C	VNG_0142C	VNG_RS00590	MarR family transcriptional regulator	VNG_RS00590		107	26	70	10		0.000163263	3.84703e-05	0.000116935	1.84545e-05		1	2.08538	1	2.66367	1	-1.05977	1	0.481484
gene-VNG_0143H|VNG_0143H|VNG_0143H	VNG_0143H	VNG_RS13250				12	1	7	2		1.83098e-05	1.47963e-06	1.16935e-05	3.69089e-06		1	3.62931	0		0		1	0.646908
gene-VNG_0144H|VNG_0144H|VNG_0144H	VNG_0144H	VNG_RS00595	DUF302 domain -containing protein	VNG_RS00595		10	20	18	11		1.52582e-05	2.95925e-05	3.00691e-05	2.02999e-05		1	-0.95565	1	0.566806	1	-0.543759	1	-0.978696
gene-VNG_0146H|VNG_0146H|VNG_0146H	VNG_0146H	VNG_RS00600	hypothetical protein	VNG_RS00600		20	11	14	11		3.05164e-05	1.62759e-05	2.3387e-05	2.02999e-05		1	0.906846	1	0.204235	1	0.318737	1	0.383874
gene-VNG_0147C|VNG_0147C|VNG_0147C	VNG_0147C	VNG_RS00605	CopG family ribbon-helix-helix protein	VNG_RS00605		12	5	17	3		1.83098e-05	7.39814e-06	2.83986e-05	5.53634e-06		1	1.30738	1	2.35881	0		1	-0.6332
gene-VNG_0149G|VNG_0149G|cadA	VNG_0149G	VNG_RS00610	cation- translocatingP-typeATPase	VNG_RS00610		36	9	25	4		5.49295e-05	1.33166e-05	4.17626e-05	7.38179e-06		1	2.04435	1	2.50017	0		1	0.395369
gene-VNG_0150H|VNG_0150H|VNG_0150H	VNG_0150H	VNG_RS00615	cytochromecbiogenesis protein	VNG_RS00615		7	3	7	1		1.06807e-05	4.43888e-06	1.16935e-05	1.84545e-06		0		0		0		0
gene-VNG_0151C|VNG_0151C|trxA4	VNG_0151C	VNG_RS00620	TlpA family protein disulfide reductase	VNG_RS00620		13	13	7	2		1.98356e-05	1.92352e-05	1.16935e-05	3.69089e-06		1	0.0443497	0		1	-2.3817	1	0.762385
gene-VNG_0152G|VNG_0152G|VNG_0152G	VNG_0152G	VNG_RS00625	SCO family protein	VNG_RS00625		55	40	48	21		8.392e-05	5.91851e-05	8.01842e-05	3.87544e-05		1	0.503781	1	1.04896	1	-0.610874	1	0.0656977
gene-VNG_0153C|VNG_0153C|VNG_0153C	VNG_0153C	VNG_RS00630	rodshape-determining protein	VNG_RS00630		130	103	94	122		0.000198356	0.000152402	0.000157027	0.000225145		1	0.380217	1	-0.519836	1	0.562974	1	0.337079
gene-VNG_0154G|VNG_0154G|VNG_0154G	VNG_0154G	VNG_RS00635	NAD(P)/FAD-dependent oxidoreductase	VNG_RS00635		45	50	26	30		6.86618e-05	7.39814e-05	4.34331e-05	5.53634e-05		1	-0.107653	1	-0.350139	1	-0.418228	1	0.660714
gene-VNG_0156C|VNG_0156C|VNG_0156C	VNG_0156C	VNG_RS00640	helix-turn-helix domain -containing protein	VNG_RS00640		29	17	24	3		4.42487e-05	2.51537e-05	4.00921e-05	5.53634e-06		1	0.814868	1	2.85631	1	-2.18376	1	0.142319
gene-VNG_0157G|VNG_0157G|VNG_0157G	VNG_0157G	VNG_RS00645	MFS transporter	VNG_RS00645		16	1	9	0		2.44131e-05	1.47963e-06	1.50345e-05	0		1	4.04435	1	#DIV/0!	0		1	0.699375
gene-VNG_0158G|VNG_0158G|kdgK	VNG_0158G	VNG_RS00650	sugarkinase	VNG_RS00650		24	30	28	9		3.66196e-05	4.43888e-05	4.67741e-05	1.6609e-05		1	-0.277578	1	1.49374	1	-1.41823	1	-0.353092
gene-VNG_0159G|VNG_0159G|mutL	VNG_0159G	VNG_RS00655	DNAmismatch repair endonuclease MutL	mutL		30	29	18	9		4.57746e-05	4.29092e-05	3.00691e-05	1.6609e-05		1	0.0932593	1	0.856312	1	-1.36932	1	0.606266
gene-VNG_0160a|VNG_0160a|VNG_0160a	VNG_0160a					33	15	43	14		5.0352e-05	2.21944e-05	7.18316e-05	2.58363e-05		1	1.18185	1	1.47522	1	0.219201	1	-0.51257
gene-VNG_0160G|VNG_0160G|boa1	VNG_0160G	VNG_RS00660	helix-turn-helix domain -containing protein	VNG_RS00660		49	30	72	30		7.47651e-05	4.43888e-05	0.000120276	5.53634e-05		1	0.752169	1	1.11935	1	0.318737	1	-0.685915
gene-VNG_0161G|VNG_0161G|gdhA3	VNG_0161G	VNG_RS00665	Glu/Leu/Phe/Valdehydrogenase	VNG_RS00665		2685	2249	4033	1873		0.00409682	0.00332768	0.00673714	0.00345652		1	0.299988	1	0.962815	1	0.0548044	1	-0.717631
gene-VNG_0162G|VNG_0162G|acs4	VNG_0162G	VNG_RS00670	AMP-binding protein	VNG_RS00670		1066	649	1710	754		0.00162652	0.000960278	0.00285656	0.00139147		1	0.760267	1	1.03767	1	0.535083	1	-0.812488
gene-VNG_0163G|VNG_0163G|mutS1b	VNG_0163G	VNG_RS00675	DNAmismatch repair protein MutS	mutS		49	27	53	18		7.47651e-05	3.99499e-05	8.85367e-05	3.32181e-05		1	0.904172	1	1.41431	1	-0.266225	1	-0.24391
gene-VNG_0164G|VNG_0164G|hypE2	VNG_0164G	VNG_RS00680	hydrogenaseexpression protein	VNG_RS00680		9	2	11	2		1.37324e-05	2.95925e-06	1.83755e-05	3.69089e-06		0		1	2.31574	0		1	-0.420206
gene-VNG_0166G|VNG_0166G|psmA	VNG_0166G	VNG_RS00685	archaeal proteasome endopeptidase complex subunit alpha	psmA		114	59	78	31		0.000173943	8.7298e-05	0.000130299	5.72089e-05		1	0.994597	1	1.18752	1	-0.60971	1	0.416788
gene-VNG_0167H|VNG_0167H|trxA3	VNG_0167H	VNG_RS00690	thioredoxin family protein	VNG_RS00690		14	5	8	2		2.13615e-05	7.39814e-06	1.3364e-05	3.69089e-06		1	1.52978	0		0		1	0.676655
gene-VNG_0168H|VNG_0168H|rpoeps	VNG_0168H	VNG_RS00695	hypothetical protein	VNG_RS00695		164	35	62	17		0.000250234	5.17869e-05	0.000103571	3.13726e-05		1	2.27262	1	1.72305	1	-0.723083	1	1.27266
gene-VNG_0170C|VNG_0170C|VNG_0170C	VNG_0170C	VNG_RS00700	DsbA family protein	VNG_RS00700		75	15	30	5		0.000114436	2.21944e-05	5.01151e-05	9.22724e-06		1	2.36628	1	2.44127	1	-1.26623	1	1.19123
gene-VNG_0171C|VNG_0171C|nucS1	VNG_0171C	VNG_RS00705	endonuclease NucS	nucS		1	1	1	0		1.52582e-06	1.47963e-06	1.6705e-06	0		0		0		0		0
gene-VNG_0172G|VNG_0172G|mutS1a	VNG_0172G	VNG_RS00710	DNA mismatch repair protein MutS	mutS		10	4	11	1		1.52582e-05	5.91851e-06	1.83755e-05	1.84545e-06		1	1.36628	1	3.31574	0		1	-0.268203
gene-VNG_0174G|VNG_0174G|cat1	VNG_0174G	VNG_RS00715	aminoacidpermease	VNG_RS00715		39	19	67	8		5.95069e-05	2.81129e-05	0.000111924	1.47636e-05		1	1.08182	1	2.9224	1	-0.92919	1	-0.911387
gene-VNG_0175G|VNG_0175G|trkA1	VNG_0175G	VNG_RS00720	TrkA family potassiumuptake protein	VNG_RS00720		71	23	58	16		0.000108333	3.40314e-05	9.68892e-05	2.95272e-05		1	1.67053	1	1.71429	1	-0.204825	1	0.161067
gene-VNG_0176H|VNG_0176H|VNG_0176H	VNG_0176H	VNG_RS00725	GNAT family N-acetyl transferase	VNG_RS00725		69	22	20	34		0.000105281	3.25518e-05	3.34101e-05	6.27452e-05		1	1.69344	1	-0.909223	1	0.946768	1	1.6559
gene-VNG_0177G|VNG_0177G|rpl15e	VNG_0177G	VNG_RS00730	50Sribosomal protein L15e	VNG_RS00730		695	132	487	60		0.00106044	0.000195311	0.000813535	0.000110727		1	2.44082	1	2.8772	1	-0.818766	1	0.382392
gene-VNG_0178H|VNG_0178H|VNG_0178H	VNG_0178H	VNG_RS00735	restriction endonuclease	VNG_RS00735		51	62	32	23		7.78167e-05	9.17369e-05	5.34561e-05	4.24453e-05		1	-0.237421	1	0.33275	1	-1.1119	1	0.541726
gene-VNG_0179C|VNG_0179C|rio2	VNG_0179C	VNG_RS00740	hypothetical protein	VNG_RS00740		32	14	28	13		4.88262e-05	2.07148e-05	4.67741e-05	2.39908e-05		1	1.23699	1	0.963227	1	0.211822	1	0.0619455
gene-VNG_0180G|VNG_0180G|hop	VNG_0180G	VNG_RS00745	bacteriorhodopsin	VNG_RS00745		9	37	10	41		1.37324e-05	5.47462e-05	1.6705e-05	7.56633e-05		1	-1.99518	1	-2.17931	1	0.466836	1	-0.282703
gene-VNG_0181G|VNG_0181G|lpl1	VNG_0181G	VNG_RS00750	lipoate-- protein ligase family protein	VNG_RS00750		19	12	21	8		2.89905e-05	1.77555e-05	3.50806e-05	1.47636e-05		1	0.707315	1	1.24863	1	-0.266225	1	-0.275089
gene-VNG_0183G|VNG_0183G|apn1	VNG_0183G	VNG_RS00755	deoxyribonucleaseIV	VNG_RS00755		143	34	106	17		0.000218192	5.03073e-05	0.000177073	3.13726e-05		1	2.11676	1	2.49677	1	-0.681263	1	0.301251
gene-VNG_0184H|VNG_0184H|VNG_0184H	VNG_0184H	VNG_RS00760	classISAM-dependentmethyl transferase	VNG_RS00760		16	19	10	11		2.44131e-05	2.81129e-05	1.6705e-05	2.02999e-05		1	-0.203578	1	-0.281191	1	-0.469759	1	0.547372
gene-VNG_0186G|VNG_0186G|pepB1	VNG_0186G	VNG_RS00765	aminopeptidase	VNG_RS00765		142	51	134	18		0.000216666	7.5461e-05	0.000223847	3.32181e-05		1	1.52167	1	2.75248	1	-1.18376	1	-0.0470416
gene-VNG_0187H|VNG_0187H|VNG_0187H	VNG_0187H	VNG_RS00770	hypothetical protein	VNG_RS00770		19	9	17	4		2.89905e-05	1.33166e-05	2.83986e-05	7.38179e-06		1	1.12235	1	1.94377	0		1	0.0297651
gene-VNG_0188H|VNG_0188H|VNG_0188H	VNG_0188H	VNG_RS00775	MFS transporter	VNG_RS00775		9	10	13	7		1.37324e-05	1.47963e-05	2.17165e-05	1.29181e-05		1	-0.107653	1	0.749397	1	-0.195836	1	-0.661214
gene-VNG_0189C|VNG_0189C|VNG_0189C	VNG_0189C	VNG_RS00780	HD domain -containing protein	VNG_RS00780		19	3	14	3		2.89905e-05	4.43888e-06	2.3387e-05	5.53634e-06		1	2.70731	1	2.0787	0		1	0.309873
gene-VNG_0190C|VNG_0190C|ncsA	VNG_0190C	VNG_RS00785	TIGR00269 family protein	VNG_RS00785		6	9	9	2		9.15491e-06	1.33166e-05	1.50345e-05	3.69089e-06		0		1	2.02624	0		1	-0.715662
gene-VNG_0192G|VNG_0192G|ftsZ2	VNG_0192G	VNG_RS00790	celldivision protein FtsZ	ftsZ		2006	3528	3490	2973		0.00306079	0.00522012	0.00583006	0.00548652		1	-0.770179	1	0.0876197	1	0.071806	1	-0.929605
gene-VNG_0194H|VNG_0194H|VNG_0194H	VNG_0194H	VNG_RS00795	typeIItoxin-antitoxinsystemParD family antitoxin	VNG_RS00795		678	1295	1208	997		0.0010345	0.00191612	0.00201797	0.00183991		1	-0.889245	1	0.133267	1	-0.0585496	1	-0.963963
gene-VNG_0195H|VNG_0195H|VNG_0195H	VNG_0195H	VNG_RS00800	zincribbon domain -containing protein	VNG_RS00800		31	87	37	36		4.73004e-05	0.000128728	6.18086e-05	6.64361e-05		1	-1.4444	1	-0.10416	1	-0.954281	1	-0.385957
gene-VNG_0197a|VNG_0197a|VNG_0197a	VNG_0197a					14	2	4	0		2.13615e-05	2.95925e-06	6.68201e-06	0		1	2.8517	0		0		1	1.67666
gene-VNG_0197C|VNG_0197C|VNG_0197C	VNG_0197C	VNG_RS00815	flippase-like domain -containing protein	VNG_RS00815		25	14	24	6		3.81455e-05	2.07148e-05	4.00921e-05	1.10727e-05		1	0.880851	1	1.85631	1	-0.903655	1	-0.0718059
gene-VNG_0198H|VNG_0198H|VNG_0198H	VNG_0198H	VNG_RS13255	hypothetical protein	VNG_RS13255		0	1	0	1		0	1.47963e-06	0	1.84545e-06		0		0		0		0
gene-VNG_0199H|VNG_0199H|VNG_0199H	VNG_0199H	VNG_RS00830	hypothetical protein	VNG_RS00830		0	1	1	0		0	1.47963e-06	1.6705e-06	0		0		0		0		0
gene-VNG_0200a|VNG_0200a|VNG_0200a	VNG_0200a					0	0	1	0		0	0	1.6705e-06	0		0		0		0		0
gene-VNG_0200C|VNG_0200C|VNG_0200C	VNG_0200C	VNG_RS00835	hypothetical protein	VNG_RS00835		3	0	0	0		4.57746e-06	0	0	0		0		0		0		0
gene-VNG_0204H|VNG_0204H|VNG_0204H	VNG_0204H	VNG_RS00845	hypothetical protein			0	0	0	0		0	0	0	0		0		0		0		0
gene-VNG_0207H|VNG_0207H|VNG_0207H	VNG_0207H	VNG_RS00860	hypothetical protein	VNG_RS00860		349	597	622	398		0.000532511	0.000883337	0.00103905	0.000734488		1	-0.730154	1	0.500458	1	-0.266225	1	-0.964387
gene-VNG_0208H|VNG_0208H|VNG_0208H	VNG_0208H	VNG_RS13260				301	595	580	476		0.000459271	0.000880378	0.000968892	0.000878433		1	-0.938776	1	0.141403	1	-0.00319097	1	-1.07699
gene-VNG_0209H|VNG_0209H|VNG_0209H	VNG_0209H	VNG_RS00870	pseudo	VNG_RS00870		806	1414	52	26		0.00122981	0.00209219	8.68662e-05	4.79816e-05		1	-0.766581	1	0.856312	1	-5.44639	1	3.8235
gene-VNG_0214C|VNG_0214C|VNG_0214C	VNG_0214C	VNG_RS13925	hypothetical protein	VNG_RS13925		10	2	6	1		1.52582e-05	2.95925e-06	1.0023e-05	1.84545e-06		1	2.36628	0		0		1	0.606266
gene-VNG_0215C|VNG_0215C|VNG_0215C	VNG_0215C	VNG_RS00880	PriCT-2 domain -containing protein	VNG_RS00880		36	16	27	22		5.49295e-05	2.3674e-05	4.51036e-05	4.05998e-05		1	1.21427	1	0.151768	1	0.778169	1	0.284338
gene-VNG_0216H|VNG_0216H|VNG_0216H	VNG_0216H	VNG_RS13930	hypothetical protein	VNG_RS13930		0	0	0	1		0	0	0	1.84545e-06		0		0		0		0
gene-VNG_0217H|VNG_0217H|VNG_0217H	VNG_0217H	VNG_RS00885	hypothetical protein	VNG_RS00885		33	4	6	2		5.0352e-05	5.91851e-06	1.0023e-05	3.69089e-06		1	3.08874	0		0		1	2.32873
gene-VNG_0218G|VNG_0218G|pilB2	VNG_0218G	VNG_RS00890	Flp pilus assembly complex ATPase component TadA	tadA		4	1	3	0		6.10327e-06	1.47963e-06	5.01151e-06	0		0		0		0		0
gene-VNG_0219H|VNG_0219H|VNG_0219H	VNG_0219H	VNG_RS00895	DUF4129 domain -containing protein	VNG_RS00895		14	51	35	28		2.13615e-05	7.5461e-05	5.84676e-05	5.16725e-05		1	-1.82072	1	0.17824	1	-0.546333	1	-1.45263
gene-VNG_0220H|VNG_0220H|VNG_0220H	VNG_0220H	VNG_RS00900	hypothetical protein	VNG_RS00900		8	34	14	17		1.22065e-05	5.03073e-05	2.3387e-05	3.13726e-05		1	-2.04311	1	-0.423796	1	-0.681263	1	-0.938054
gene-VNG_0222a|VNG_0222a|VNG_0222a	VNG_0222a					0	3	5	3		0	4.43888e-06	8.35252e-06	5.53634e-06		0		0		0		0
gene-VNG_0222C|VNG_0222C|VNG_0222C	VNG_0222C	VNG_RS00905	DUF58 domain -containing protein	VNG_RS00905		16	38	33	25		2.44131e-05	5.62258e-05	5.51266e-05	4.61362e-05		1	-1.20358	1	0.25685	1	-0.285334	1	-1.17509
gene-VNG_0223G|VNG_0223G|moxR	VNG_0223G	VNG_RS00915	AAA family ATPase	VNG_RS00915		25	10	29	9		3.81455e-05	1.47963e-05	4.84446e-05	1.6609e-05		1	1.36628	1	1.54437	1	0.166734	1	-0.344824
gene-VNG_0226G|VNG_0226G|degP	VNG_0226G	VNG_RS00925	trypsin-likepeptidase domain -containing protein	VNG_RS00925		157	71	76	35		0.000239553	0.000105054	0.000126958	6.45907e-05		1	1.18922	1	0.974957	1	-0.701727	1	0.915994
gene-VNG_0227H|VNG_0227H|VNG_0227H	VNG_0227H	VNG_RS00930	DUF192 domain -containing protein	VNG_RS00930		52	90	52	72		7.93426e-05	0.000133166	8.68662e-05	0.000132872		1	-0.747064	1	-0.613173	1	-0.00319097	1	-0.1307
gene-VNG_0228G|VNG_0228G|guaAa1	VNG_0228G	VNG_RS00935	GMPsynthasesubunitA	VNG_RS00935		36	10	25	6		5.49295e-05	1.47963e-05	4.17626e-05	1.10727e-05		1	1.89235	1	1.91521	1	-0.418228	1	0.395369
gene-VNG_0230C|VNG_0230C|VNG_0230C	VNG_0230C	VNG_RS00940	DUF2070 family protein	VNG_RS00940		159	21	67	13		0.000242605	3.10722e-05	0.000111924	2.39908e-05		1	2.96492	1	2.22196	1	-0.373141	1	1.11609
gene-VNG_0231C|VNG_0231C|VNG_0231C	VNG_0231C	VNG_RS00945	MBLfoldmetallo-hydrolase	VNG_RS00945		51	60	38	33		7.78167e-05	8.87776e-05	6.34791e-05	6.08998e-05		1	-0.190116	1	0.0598455	1	-0.543759	1	0.293798
gene-VNG_0233H|VNG_0233H|VNG_0233H	VNG_0233H	VNG_RS00950	DUF3194 domain -containing protein	VNG_RS00950		44	35	28	19		6.7136e-05	5.17869e-05	4.67741e-05	3.50635e-05		1	0.374498	1	0.41574	1	-0.562618	1	0.521377
gene-VNG_0234a|VNG_0234a|pcc1	VNG_0234a					8	6	8	1		1.22065e-05	8.87776e-06	1.3364e-05	1.84545e-06		0		0		0		0
gene-VNG_0234C|VNG_0234C|pfdB	VNG_0234C	VNG_RS00955	prefoldinsubunitbeta	VNG_RS00955		73	82	79	50		0.000111385	0.000121329	0.00013197	9.22724e-05		1	-0.123378	1	0.516237	1	-0.394959	1	-0.244656
gene-VNG_0237H|VNG_0237H|rpoP	VNG_0237H	VNG_RS00965	DNA-directedRNApolymerasesubunitP	VNG_RS00965		23	22	23	5		3.50938e-05	3.25518e-05	3.84216e-05	9.22724e-06		1	0.10848	1	2.05795	1	-1.81877	1	-0.1307
gene-VNG_0238H|VNG_0238H|VNG_0238H	VNG_0238H	VNG_RS00975	hypothetical protein	VNG_RS00975		8	7	4	1		1.22065e-05	1.03574e-05	6.68201e-06	1.84545e-06		0		0		0		0
gene-VNG_0239C|VNG_0239C|rpl43e	VNG_0239C	VNG_RS00970	50Sribosomal protein L37ae	VNG_RS00970		66	47	69	20		0.000100704	6.95425e-05	0.000115265	3.69089e-05		1	0.534155	1	1.64291	1	-0.913924	1	-0.19483
gene-VNG_0240C|VNG_0240C|VNG_0240C	VNG_0240C	VNG_RS00980	DUF2103 domain -containing protein	VNG_RS00980		31	8	14	8		4.73004e-05	1.1837e-05	2.3387e-05	1.47636e-05		1	1.99855	1	0.663667	0		1	1.01614
gene-VNG_0243a|VNG_0243a|pth	VNG_0243a	VNG_RS00990	peptidyl-tRNA hydrolase Pth2	VNG_RS00990		9	8	8	1		1.37324e-05	1.1837e-05	1.3364e-05	1.84545e-06		0		0		0		0
gene-VNG_0243C|VNG_0243C|truD	VNG_0243C	VNG_RS00985	tRNApseudouridine(13)synthaseTruD	truD		41	13	24	2		6.25586e-05	1.92352e-05	4.00921e-05	3.69089e-06		1	1.70146	1	3.44127	1	-2.3817	1	0.64189
gene-VNG_0244H|VNG_0244H|VNG_0244H	VNG_0244H	VNG_RS00995	YIP1 family protein	VNG_RS00995		14	7	6	5		2.13615e-05	1.03574e-05	1.0023e-05	9.22724e-06		1	1.04435	0		0		1	1.09169
gene-VNG_0245G|VNG_0245G|dcd	VNG_0245G	VNG_RS01000	dCTPdeaminase	VNG_RS01000		27	16	23	7		4.11971e-05	2.3674e-05	3.84216e-05	1.29181e-05		1	0.799237	1	1.57252	1	-0.873908	1	0.100626
gene-VNG_0247C|VNG_0247C|thiR	VNG_0247C	VNG_RS01005	helix-turn-helix domain -containing protein	VNG_RS01005		32	16	22	9		4.88262e-05	2.3674e-05	3.67511e-05	1.6609e-05		1	1.04435	1	1.14582	1	-0.511338	1	0.409869
gene-VNG_0248C|VNG_0248C|VNG_0248C	VNG_0248C	VNG_RS01010	hypothetical protein	VNG_RS01010		22	3	29	8		3.3568e-05	4.43888e-06	4.84446e-05	1.47636e-05		1	2.91882	1	1.71429	0		1	-0.529249
gene-VNG_0249G|VNG_0249G|hcpG	VNG_0249G	VNG_RS01015	DUF5059 domain -containing protein	VNG_RS01015		135	8	99	17		0.000205985	1.1837e-05	0.00016538	3.13726e-05		1	4.12117	1	2.39821	1	1.4062	1	0.316759
gene-VNG_0250C|VNG_0250C|VNG_0250C	VNG_0250C	VNG_RS01020	phosphopantothenate/pantothenatesynthetase	VNG_RS01020		30	18	25	4		4.57746e-05	2.66333e-05	4.17626e-05	7.38179e-06		1	0.781315	1	2.50017	1	-1.85119	1	0.132335
gene-VNG_0251C|VNG_0251C|VNG_0251C	VNG_0251C	VNG_RS01025	sugarkinase	VNG_RS01025		17	5	14	4		2.59389e-05	7.39814e-06	2.3387e-05	7.38179e-06		1	1.80988	1	1.66367	0		1	0.149408
gene-VNG_0252C|VNG_0252C|pcrB1	VNG_0252C	VNG_RS01030	putativephosphoglycerolgeranyl geranyl transferase	VNG_RS01030		73	13	43	12		0.000111385	1.92352e-05	7.18316e-05	2.21454e-05		1	2.53373	1	1.69761	1	0.20326	1	0.63286
gene-VNG_0254G|VNG_0254G|tfbG	VNG_0254G	VNG_RS01035	transcriptioninitiationfactorIIB	VNG_RS01035		491	474	371	392		0.000749177	0.000701343	0.000619757	0.000723415		1	0.0951857	1	-0.223122	1	0.0447037	1	0.273604
gene-VNG_0255C|VNG_0255C|rnhA2	VNG_0255C	VNG_RS01040	ribonucleaseHI family protein	VNG_RS01040		6	9	13	8		9.15491e-06	1.33166e-05	2.17165e-05	1.47636e-05		0		1	0.556752	0		1	-1.24618
gene-VNG_0256H|VNG_0256H|VNG_0256H	VNG_0256H	VNG_RS01045	hypothetical protein	VNG_RS01045		8	6	11	0		1.22065e-05	8.87776e-06	1.83755e-05	0		0		1	#DIV/0!	0		1	-0.590131
gene-VNG_0258H|VNG_0258H|rosR	VNG_0258H	VNG_RS01050	helix-turn-helix transcriptionalregulator	VNG_RS01050		221	693	352	437		0.000337206	0.00102538	0.000588017	0.000806461		1	-1.60446	1	-0.455746	1	-0.346485	1	-0.802229
gene-VNG_0259G|VNG_0259G|ipp	VNG_0259G	VNG_RS01055	inorganicdiphosphatase	VNG_RS01055		131	92	178	35		0.000199882	0.000136126	0.00029735	6.45907e-05		1	0.554211	1	2.20276	1	-1.07554	1	-0.57301
gene-VNG_0261H|VNG_0261H|VNG_0261H	VNG_0261H					61	16	18	26		9.30749e-05	2.3674e-05	3.00691e-05	4.79816e-05		1	1.97509	1	-0.674203	1	1.01918	1	1.63011
gene-VNG_0262C|VNG_0262C|VNG_0262C	VNG_0262C	VNG_RS01060	bifunctionaloligoribonuclease/PAPphosphataseNrnA	VNG_RS01060		271	120	72	59		0.000413497	0.000177555	0.000120276	0.000108881		1	1.21961	1	0.143594	1	-0.70551	1	1.78152
gene-VNG_0264H|VNG_0264H|VNG_0264H	VNG_0264H	VNG_RS01065	alkalinephosphatase family protein	VNG_RS01065		113	72	82	43		0.000172417	0.000106533	0.000136981	7.93542e-05		1	0.694604	1	0.787599	1	-0.424923	1	0.331927
gene-VNG_0265G|VNG_0265G|cetZ2	VNG_0265G	VNG_RS01070	celldivision protein	VNG_RS01070		74	144	49	86		0.000112911	0.000213066	8.18547e-05	0.000158708		1	-0.916122	1	-0.955243	1	-0.424923	1	0.464044
gene-VNG_0266H|VNG_0266H|VNG_0266H	VNG_0266H	VNG_RS01075	hypothetical protein	VNG_RS01075		33	9	27	2		5.0352e-05	1.33166e-05	4.51036e-05	3.69089e-06		1	1.91882	1	3.6112	0		1	0.158807
gene-VNG_0267H|VNG_0267H|VNG_0267H	VNG_0267H	VNG_RS01080	SDR family oxidoreductase	VNG_RS01080		34	7	20	2		5.18778e-05	1.03574e-05	3.34101e-05	3.69089e-06		1	2.32446	1	3.17824	0		1	0.634835
gene-VNG_0268C|VNG_0268C|VNG_0268C	VNG_0268C	VNG_RS01085	aldo/ketoreductase	VNG_RS01085		63	21	44	5		9.61266e-05	3.10722e-05	7.35021e-05	9.22724e-06		1	1.62931	1	2.99382	1	-1.75165	1	0.387149
gene-VNG_0270C|VNG_0270C|VNG_0270C	VNG_0270C	VNG_RS01090	MFS transporter	VNG_RS01090		63	14	35	6		9.61266e-05	2.07148e-05	5.84676e-05	1.10727e-05		1	2.21427	1	2.40063	1	-0.903655	1	0.717297
gene-VNG_0271C|VNG_0271C|gtl5	VNG_0271C	VNG_RS01095	glycosyl transferase family 2	VNG_RS01095		14	5	5	0		2.13615e-05	7.39814e-06	8.35252e-06	0		1	1.52978	0		0		1	1.35473
gene-VNG_0272H|VNG_0272H|VNG_0272H	VNG_0272H	VNG_RS01100	hypothetical protein	VNG_RS01100		4	1	2	2		6.10327e-06	1.47963e-06	3.34101e-06	3.69089e-06		0		0		0		0
gene-VNG_0274C|VNG_0274C|VNG_0274C	VNG_0274C	VNG_RS01105	CoApyrophosphatase	VNG_RS01105		118	26	58	19		0.000180047	3.84703e-05	9.68892e-05	3.50635e-05		1	2.22655	1	1.46637	1	-0.133775	1	0.893962
gene-VNG_0277a|VNG_0277a|VNG_0277a	VNG_0277a					193	15	65	10		0.000294483	2.21944e-05	0.000108583	1.84545e-05		1	3.72992	1	2.55675	1	-0.266225	1	1.43939
gene-VNG_0277G|VNG_0277G|VNG_0277G	VNG_0277G	VNG_RS01110	FAD-dependentoxidoreductase	VNG_RS01110		203	71	94	30		0.000309741	0.000105054	0.000157027	5.53634e-05		1	1.55994	1	1.50401	1	-0.924119	1	0.980048
gene-VNG_0280a|VNG_0280a|VNG_0280a	VNG_0280a					0	0	0	0		0	0	0	0		0		0		0		0
gene-VNG_0280H|VNG_0280H|VNG_0280H	VNG_0280H	VNG_RS01115	LLM class flavin-dependent oxidoreductase	VNG_RS01115		58	7	35	4		8.84975e-05	1.03574e-05	5.84676e-05	7.38179e-06		1	3.09498	1	2.9856	0		1	0.597998
gene-VNG_0281G|VNG_0281G|VNG_0281G	VNG_0281G	VNG_RS01120	FAD-bindingoxidoreductase	VNG_RS01120		31	4	12	1		4.73004e-05	5.91851e-06	2.0046e-05	1.84545e-06		1	2.99855	1	3.44127	0		1	1.23853
gene-VNG_0282a|VNG_0282a|VNG_0282a	VNG_0282a					16	9	27	5		2.44131e-05	1.33166e-05	4.51036e-05	9.22724e-06		1	0.874425	1	2.28927	0		1	-0.885587
gene-VNG_0282H|VNG_0282H|VNG_0282H	VNG_0282H	VNG_RS14160	hypothetical protein	VNG_RS14160		7	1	7	2		1.06807e-05	1.47963e-06	1.16935e-05	3.69089e-06		0		0		0		0
gene-VNG_0283C|VNG_0283C|hsp20D	VNG_0283C	VNG_RS01125	Hsp20/alphacrystallin family protein	VNG_RS01125		103	61	39	35		0.000157159	9.02572e-05	6.51496e-05	6.45907e-05		1	0.800113	1	0.0124313	1	-0.482717	1	1.2704
gene-VNG_0284C|VNG_0284C|VNG_0284C	VNG_0284C	VNG_RS01135	radicalSAM protein	VNG_RS01135		102	48	78	18		0.000155633	7.10221e-05	0.000130299	3.32181e-05		1	1.13181	1	1.97179	1	-1.0963	1	0.256324
gene-VNG_0287a|VNG_0287a|VNG_0287a	VNG_0287a					114	117	122	65		0.000173943	0.000173116	0.000203801	0.000119954		1	0.00687499	1	0.764682	1	-0.52926	1	-0.228547
gene-VNG_0289H|VNG_0289H|VNG_0289H	VNG_0289H	VNG_RS01155	YkgJ family cysteinecluster protein	VNG_RS01155		98	13	38	4		0.00014953	1.92352e-05	6.34791e-05	7.38179e-06		1	2.95862	1	3.10424	1	-1.3817	1	1.23608
gene-VNG_0291H|VNG_0291H|VNG_0291H	VNG_0291H	VNG_RS01160	MBLfoldmetallo-hydrolase	VNG_RS01160		448	41	124	48		0.000683567	6.06647e-05	0.000207142	8.85815e-05		1	3.49415	1	1.22555	1	0.546148	1	1.72246
gene-VNG_0293H|VNG_0293H|VNG_0293H	VNG_0293H	VNG_RS01165	MarR family transcriptionalregulator	VNG_RS01165		331	72	110	72		0.000505046	0.000106533	0.000183755	0.000132872		1	2.24511	1	0.467747	1	0.318737	1	1.45863
gene-VNG_0294G|VNG_0294G|VNG_0294G	VNG_0294G	VNG_RS01170	classISAM-dependentmethyl transferase	VNG_RS01170		10	20	14	7		1.52582e-05	2.95925e-05	2.3387e-05	1.29181e-05		1	-0.95565	1	0.856312	1	-1.19584	1	-0.616126
gene-VNG_0296H|VNG_0296H|gtl4	VNG_0296H	VNG_RS01175	glycosyl transferase	VNG_RS01175		13	27	25	7		1.98356e-05	3.99499e-05	4.17626e-05	1.29181e-05		1	-1.0101	1	1.69281	1	-1.6288	1	-1.07412
gene-VNG_0297H|VNG_0297H|VNG_0297H	VNG_0297H	VNG_RS01180	amidohydrolase family protein	VNG_RS01180		13	8	17	1		1.98356e-05	1.1837e-05	2.83986e-05	1.84545e-06		1	0.744789	1	3.94377	0		1	-0.517723
gene-VNG_0298H|VNG_0298H|VNG_0298H	VNG_0298H	VNG_RS01185	TRICcationchannel family protein	VNG_RS01185		6	5	2	1		9.15491e-06	7.39814e-06	3.34101e-06	1.84545e-06		0		0		0		0
gene-VNG_0300C|VNG_0300C|VNG_0300C	VNG_0300C	VNG_RS01190	S-adenosyl -l-methioninehydroxideadenosyl transferase family protein	VNG_RS01190		4	8	5	6		6.10327e-06	1.1837e-05	8.35252e-06	1.10727e-05		0		0		0		0
gene-VNG_0301C|VNG_0301C|nadM	VNG_0301C	VNG_RS01195	nicotinamide-nucleotideadenyl yl transferase	VNG_RS01195		6	7	15	1		9.15491e-06	1.03574e-05	2.50575e-05	1.84545e-06		0		1	3.7632	0		1	-1.45263
gene-VNG_0303G|VNG_0303G|lon	VNG_0303G	VNG_RS01200	ATP-dependentproteaseLonB	lonB		2610	619	1079	507		0.00398239	0.000915889	0.00180247	0.000935642		1	2.12039	1	0.945949	1	0.0307835	1	1.14366
gene-VNG_0305G|VNG_0305G|trpC	VNG_0305G	VNG_RS01210	indole-3-glycerol-phosphatesynthase	VNG_RS01210		3	1	2	0		4.57746e-06	1.47963e-06	3.34101e-06	0		0		0		0		0
gene-VNG_0306C|VNG_0306C|ogt	VNG_0306C	VNG_RS01205	methyl ated-DNA--[ protein ]-cysteineS-methyl transferase	VNG_RS01205		3	1	1	0		4.57746e-06	1.47963e-06	1.6705e-06	0		0		0		0		0
gene-VNG_0307G|VNG_0307G|trpB	VNG_0307G	VNG_RS01215	tryptophansynthasesubunitbeta	trpB		27	3	13	3		4.11971e-05	4.43888e-06	2.17165e-05	5.53634e-06		1	3.21427	1	1.97179	0		1	0.923748
gene-VNG_0308G|VNG_0308G|trpA	VNG_0308G	VNG_RS01220	tryptophansynthasesubunitalpha	VNG_RS01220		9	4	8	1		1.37324e-05	5.91851e-06	1.3364e-05	1.84545e-06		0		0		0		0
gene-VNG_0309C|VNG_0309C|fba2	VNG_0309C	VNG_RS01225	fructose-bisphosphatealdolase	VNG_RS01225		173	6	66	9		0.000263967	8.87776e-06	0.000110253	1.6609e-05		1	4.89402	1	2.73078	1	0.9037	1	1.25953
gene-VNG_0310C|VNG_0310C|aroB	VNG_0310C	VNG_RS01235	3-dehydroquinatesynthaseII	VNG_RS01235		516	76	190	31		0.000787322	0.000112452	0.000317396	5.72089e-05		1	2.80765	1	2.47197	1	-0.974994	1	1.31067
gene-VNG_0311H|VNG_0311H|VNG_0311H	VNG_0311H	VNG_RS01230	hypothetical protein	VNG_RS01230		20	10	19	2		3.05164e-05	1.47963e-05	3.17396e-05	3.69089e-06		1	1.04435	1	3.10424	1	-2.00319	1	-0.056699
gene-VNG_0312H|VNG_0312H|VNG_0312H	VNG_0312H	VNG_RS01240	zincribbon domain -containing protein	VNG_RS01240		51	50	49	18		7.78167e-05	7.39814e-05	8.18547e-05	3.32181e-05		1	0.0729188	1	1.3011	1	-1.15519	1	-0.0729841
gene-VNG_0314G|VNG_0314G|aroD	VNG_0314G	VNG_RS01245	typeI3-dehydroquinatedehydratase	VNG_RS01245		37	9	38	2		5.64553e-05	1.33166e-05	6.34791e-05	3.69089e-06		1	2.08388	1	4.10424	0		1	-0.169174
gene-VNG_0315G|VNG_0315G|tfbF	VNG_0315G	VNG_RS01250	transcriptioninitiationfactorIIB	VNG_RS01250		323	102	275	33		0.000492839	0.000150922	0.000459388	6.08998e-05		1	1.70731	1	2.91521	1	-1.30929	1	0.101403
gene-VNG_0316C|VNG_0316C|VNG_0316C	VNG_0316C	VNG_RS01255	cobalamin-binding protein	VNG_RS01255		14	13	12	8		2.13615e-05	1.92352e-05	2.0046e-05	1.47636e-05		1	0.151265	1	0.441275	1	-0.381703	1	0.0916929
gene-VNG_0318G|VNG_0318G|aglD	VNG_0318G	VNG_RS01260	flippase-like domain -containing protein	VNG_RS01260		46	18	36	9		7.01876e-05	2.66333e-05	6.01381e-05	1.6609e-05		1	1.39799	1	1.85631	1	-0.681263	1	0.222937
gene-VNG_0319H|VNG_0319H|VNG_0319H	VNG_0319H	VNG_RS01265	hypothetical protein	VNG_RS01265		35	4	6	3		5.34036e-05	5.91851e-06	1.0023e-05	5.53634e-06		1	3.17363	0		0		1	2.41362
gene-VNG_0320H|VNG_0320H|VNG_0320H	VNG_0320H	VNG_RS01270	wingedhelix-turn-helix transcriptionalregulator	VNG_RS01270		109	75	77	30		0.000166314	0.000110972	0.000128629	5.53634e-05		1	0.583715	1	1.21621	1	-1.00319	1	0.370698
gene-VNG_0321G|VNG_0321G|VNG_0321G	VNG_0321G	VNG_RS01275	SPFH/Band7/PHB domain protein	VNG_RS01275		391	499	408	397		0.000596595	0.000738334	0.000681565	0.000732643		1	-0.307522	1	-0.104258	1	-0.0111637	1	-0.1921
gene-VNG_0322H|VNG_0322H|VNG_0322H	VNG_0322H	VNG_RS01280	NfeD family protein	VNG_RS01280		64	54	31	20		9.76524e-05	7.98999e-05	5.17856e-05	3.69089e-05		1	0.289462	1	0.48858	1	-1.11422	1	0.915104
gene-VNG_0323H|VNG_0323H|VNG_0323H	VNG_0323H	VNG_RS14165	hypothetical protein	VNG_RS14165		17	16	10	11		2.59389e-05	2.3674e-05	1.6705e-05	2.02999e-05		1	0.131813	1	-0.281191	1	-0.221831	1	0.634835
gene-VNG_0324G|VNG_0324G|pykA	VNG_0324G	VNG_RS01285	pyruvatekinase	pyk		51	57	28	23		7.78167e-05	8.43387e-05	4.67741e-05	4.24453e-05		1	-0.116115	1	0.140105	1	-0.990591	1	0.734371
gene-VNG_0326G|VNG_0326G|metS	VNG_0326G	VNG_RS01290	methionine--tRNAligase	metG		129	106	106	50		0.000196831	0.00015684	0.000177073	9.22724e-05		1	0.327656	1	0.940376	1	-0.765327	1	0.152607
gene-VNG_0327G|VNG_0327G|panD	VNG_0327G	VNG_RS01295	tyrosinedecarboxyl aseMfnA	mfnA		29	21	24	11		4.42487e-05	3.10722e-05	4.00921e-05	2.02999e-05		1	0.510013	1	0.981843	1	-0.614149	1	0.142319
gene-VNG_0329G|VNG_0329G|VNG_0329G	VNG_0329G	VNG_RS01300	M48 family metallopeptidase	VNG_RS01300		133	59	125	40		0.000202934	8.7298e-05	0.000208813	7.38179e-05		1	1.21699	1	1.50017	1	-0.241978	1	-0.0412014
gene-VNG_0330G|VNG_0330G|ppsA	VNG_0330G	VNG_RS01305	pyruvate,waterdikinase	ppsA		1542	1080	1940	687		0.00235281	0.001598	0.00324078	0.00126782		1	0.558121	1	1.35399	1	-0.333912	1	-0.461953
gene-VNG_0331H|VNG_0331H|VNG_0331H	VNG_0331H	VNG_RS01310	hypothetical protein	VNG_RS01310		34	8	20	4		5.18778e-05	1.1837e-05	3.34101e-05	7.38179e-06		1	2.13181	1	2.17824	0		1	0.634835
gene-VNG_0332C|VNG_0332C|phzF1	VNG_0332C	VNG_RS01315	PhzF family phenazinebiosynthesis protein	VNG_RS01315		15	7	11	3		2.28873e-05	1.03574e-05	1.83755e-05	5.53634e-06		1	1.14389	1	1.73078	0		1	0.316759
gene-VNG_0335G|VNG_0335G|gptA1	VNG_0335G	VNG_RS01320	phosphoribosyl transferase	VNG_RS01320		52	35	48	14		7.93426e-05	5.17869e-05	8.01842e-05	2.58363e-05		1	0.615506	1	1.63392	1	-1.00319	1	-0.0152223
gene-VNG_0339H|VNG_0339H|VNG_0339H	VNG_0339H	VNG_RS01340	hypothetical protein	VNG_RS01340		90	27	18	24		0.000137324	3.99499e-05	3.00691e-05	4.42907e-05		1	1.78132	1	-0.558725	1	0.148812	1	2.19123
gene-VNG_0340C|VNG_0340C|scpA	VNG_0340C	VNG_RS01345	segregation/condensation protein A	VNG_RS01345		17	22	22	16		2.59389e-05	3.25518e-05	3.67511e-05	2.95272e-05		1	-0.327619	1	0.315744	1	-0.140694	1	-0.502668
gene-VNG_0342G|VNG_0342G|smc	VNG_0342G	VNG_RS01350	chromosomesegregation protein SMC	smc		115	136	110	80		0.000175469	0.000201229	0.000183755	0.000147636		1	-0.197623	1	0.315744	1	-0.446798	1	-0.0665692
gene-VNG_0343H|VNG_0343H|VNG_0343H	VNG_0343H	VNG_RS01355	hypothetical protein	VNG_RS01355		21	61	45	32		3.20422e-05	9.02572e-05	7.51726e-05	5.90543e-05		1	-1.49407	1	0.348165	1	-0.612	1	-1.23024
gene-VNG_0345G|VNG_0345G|gatB	VNG_0345G	VNG_RS01360	Asp-tRNA(Asn)/Glu-tRNA(Gln)amido transferasesubunitGatB	gatB		207	87	146	28		0.000315844	0.000128728	0.000243893	5.16725e-05		1	1.29489	1	2.23878	1	-1.31685	1	0.372963
gene-VNG_0346H|VNG_0346H|VNG_0346H	VNG_0346H	VNG_RS01365	hypothetical protein	VNG_RS01365		33	10	21	9		5.0352e-05	1.47963e-05	3.50806e-05	1.6609e-05		1	1.76682	1	1.0787	1	0.166734	1	0.521377
gene-VNG_0347H|VNG_0347H|VNG_0347H	VNG_0347H	VNG_RS01370	hypothetical protein	VNG_RS01370		22	8	14	3		3.3568e-05	1.1837e-05	2.3387e-05	5.53634e-06		1	1.50378	1	2.0787	0		1	0.521377
gene-VNG_0349G|VNG_0349G|topA	VNG_0349G	VNG_RS01375	DNAtopoisomeraseI	VNG_RS01375		1446	197	446	103		0.00220633	0.000291487	0.000745044	0.000190081		1	2.92015	1	1.97071	1	-0.616814	1	1.56625
gene-VNG_0351C|VNG_0351C|nreA	VNG_0351C	VNG_RS01380	hypothetical protein	VNG_RS01380		212	32	78	13		0.000323473	4.73481e-05	0.000130299	2.39908e-05		1	2.77227	1	2.44127	1	-0.980823	1	1.31182
gene-VNG_0352H|VNG_0352H|VNG_0352H	VNG_0352H	VNG_RS01385	hypothetical protein	VNG_RS01385		23	26	12	16		3.50938e-05	3.84703e-05	2.0046e-05	2.95272e-05		1	-0.132528	1	-0.558725	1	-0.381703	1	0.8079
gene-VNG_0354C|VNG_0354C|VNG_0354C	VNG_0354C	VNG_RS01390	CPBP family intramembranemetalloprotease	VNG_RS01390		37	23	18	17		5.64553e-05	3.40314e-05	3.00691e-05	3.13726e-05		1	0.730241	1	-0.0612257	1	-0.117362	1	0.908829
gene-VNG_0355G|VNG_0355G|mpcT	VNG_0355G	VNG_RS01395	HAMP domain -containing protein	VNG_RS01395		137	495	105	272		0.000209037	0.000732415	0.000175403	0.000501962		1	-1.8089	1	-1.51691	1	-0.545085	1	0.253087
gene-VNG_0357a|VNG_0357a|VNG_0357a	VNG_0357a					20	13	25	1		3.05164e-05	1.92352e-05	4.17626e-05	1.84545e-06		1	0.665838	1	4.50017	1	-3.3817	1	-0.452628
gene-VNG_0357H|VNG_0357H|VNG_0357H	VNG_0357H	VNG_RS01400	hypothetical protein	VNG_RS01400		0	0	0	0		0	0	0	0		0		0		0		0
gene-VNG_0359C|VNG_0359C|VNG_0359C	VNG_0359C	VNG_RS01405	hypothetical protein	VNG_RS01405		91	90	57	38		0.000138849	0.000133166	9.52187e-05	7.0127e-05		1	0.0602912	1	0.441275	1	-0.925188	1	0.544205
gene-VNG_0360C|VNG_0360C|VNG_0360C	VNG_0360C	VNG_RS01410	hypothetical protein	VNG_RS01410		124	30	42	17		0.000189201	4.43888e-05	7.01611e-05	3.13726e-05		1	2.09166	1	1.16117	1	-0.500691	1	1.43118
gene-VNG_0361C|VNG_0361C|VNG_0361C	VNG_0361C	VNG_RS01415	rhomboid family intramembraneserineprotease	VNG_RS01415		220	62	126	36		0.00033568	9.17369e-05	0.000210483	6.64361e-05		1	1.87151	1	1.66367	1	-0.465534	1	0.67338
gene-VNG_0363G|VNG_0363G|nfi	VNG_0363G	VNG_RS01420	endonuclease V	VNG_RS01420		71	18	25	6		0.000108333	2.66333e-05	4.17626e-05	1.10727e-05		1	2.02417	1	1.91521	1	-1.26623	1	1.37519
gene-VNG_0364G|VNG_0364G|VNG_0364G	VNG_0364G	VNG_RS01425	SDR family oxidoreductase	VNG_RS01425		60	21	43	9		9.15491e-05	3.10722e-05	7.18316e-05	1.6609e-05		1	1.55892	1	2.11265	1	-0.903655	1	0.349926
gene-VNG_0365G|VNG_0365G|arsA2	VNG_0365G	VNG_RS01430	ArsA family ATPase	VNG_RS01430		10	20	29	7		1.52582e-05	2.95925e-05	4.84446e-05	1.29181e-05		1	-0.95565	1	1.90694	1	-1.19584	1	-1.66675
gene-VNG_0367H|VNG_0367H|VNG_0367H	VNG_0367H	VNG_RS01435	nuclear transportfactor2 family protein	VNG_RS01435		16	4	11	4		2.44131e-05	5.91851e-06	1.83755e-05	7.38179e-06		1	2.04435	1	1.31574	0		1	0.409869
gene-VNG_0368a|VNG_0368a|VNG_0368a	VNG_0368a	VNG_RS01445	metal-dependent hydrolase	VNG_RS01445		76	33	63	25		0.000115962	4.88277e-05	0.000105242	4.61362e-05		1	1.24788	1	1.18974	1	-0.0818008	1	0.139948
gene-VNG_0368C|VNG_0368C|VNG_0368C	VNG_0368C	VNG_RS01440	CinA family protein	VNG_RS01440		85	42	56	15		0.000129695	6.21443e-05	9.35482e-05	2.76817e-05		1	1.06142	1	1.75678	1	-1.16669	1	0.471336
gene-VNG_0370H|VNG_0370H|VNG_0370H	VNG_0370H	VNG_RS01450	PHP domain-containing protein	VNG_RS01450		27	30	39	13		4.11971e-05	4.43888e-05	6.51496e-05	2.39908e-05		1	-0.107653	1	1.44127	1	-0.887714	1	-0.661214
gene-VNG_0371G|VNG_0371G|acd1	VNG_0371G	VNG_RS01455	acyl -CoAdehydrogenase	VNG_RS01455		92	28	83	27		0.000140375	4.14296e-05	0.000138652	4.98271e-05		1	1.76056	1	1.47646	1	0.26627	1	0.017823
gene-VNG_0373H|VNG_0373H|VNG_0373H	VNG_0373H	VNG_RS01460	hypothetical protein	VNG_RS01460		75	33	47	14		0.000114436	4.88277e-05	7.85137e-05	2.58363e-05		1	1.22877	1	1.60355	1	-0.918302	1	0.54353
gene-VNG_0374G|VNG_0374G|spt5	VNG_0374G	VNG_RS01465	transcriptionelongationfactorSpt5	VNG_RS01465		84	43	35	28		0.000128169	6.3624e-05	5.84676e-05	5.16725e-05		1	1.0104	1	0.17824	1	-0.300173	1	1.13233
gene-VNG_0375G|VNG_0375G|secE	VNG_0375G	VNG_RS01470	protein translocaseSEC61complexsubunitgamma	VNG_RS01470		23	2	8	5		3.50938e-05	2.95925e-06	1.3364e-05	9.22724e-06		1	3.56791	0		0		1	1.39286
gene-VNG_0376G|VNG_0376G|ftsZ1	VNG_0376G	VNG_RS01475	celldivision protein FtsZ	ftsZ		284	145	203	94		0.000433332	0.000214546	0.000339112	0.000173472		1	1.01419	1	0.967059	1	-0.306583	1	0.353712
gene-VNG_0378C|VNG_0378C|dtdA	VNG_0378C	VNG_RS01480	D-tyrosyl -tRNA(Tyr)deacyl ase	VNG_RS01480		25	12	26	3		3.81455e-05	1.77555e-05	4.34331e-05	5.53634e-06		1	1.10324	1	2.97179	1	-1.68126	1	-0.187283
gene-VNG_0380G|VNG_0380G|VNG_0380G	VNG_0380G	VNG_RS01485	calcium/sodiumantiporter	VNG_RS01485		24	22	42	16		3.66196e-05	3.25518e-05	7.01611e-05	2.95272e-05		1	0.169881	1	1.24863	1	-0.140694	1	-0.938054
gene-VNG_0382G|VNG_0382G|aroE	VNG_0382G	VNG_RS01490	shikimatedehydrogenase	VNG_RS01490		46	18	23	10		7.01876e-05	2.66333e-05	3.84216e-05	1.84545e-05		1	1.39799	1	1.05795	1	-0.52926	1	0.8693
gene-VNG_0383H|VNG_0383H|VNG_0383H	VNG_0383H	VNG_RS01495	hypothetical protein	VNG_RS01495		87	62	51	21		0.000132746	9.17369e-05	8.51957e-05	3.87544e-05		1	0.533097	1	1.13642	1	-1.24314	1	0.639819
gene-VNG_0384G|VNG_0384G|pabB	VNG_0384G	VNG_RS01500	aminodeoxychorismatesynthase,componentI	pabB		93	54	64	27		0.000141901	7.98999e-05	0.000106912	4.98271e-05		1	0.828621	1	1.10142	1	-0.681263	1	0.408459
gene-VNG_0386G|VNG_0386G|pabA	VNG_0386G	VNG_RS01505	aminodeoxychorismate/anthranilate synthase component II	VNG_RS01505		49	21	33	12		7.47651e-05	3.10722e-05	5.51266e-05	2.21454e-05		1	1.26674	1	1.31574	1	-0.488618	1	0.439616
gene-VNG_0387G|VNG_0387G|pabC	VNG_0387G	VNG_RS01510	aminodeoxychorismatelyase	VNG_RS01510		36	8	31	8		5.49295e-05	1.1837e-05	5.17856e-05	1.47636e-05		1	2.21427	1	1.81051	0		1	0.0850291
gene-VNG_0388C|VNG_0388C|VNG_0388C	VNG_0388C	VNG_RS01515	Rieske(2Fe-2S) protein	VNG_RS01515		27	7	19	7		4.11971e-05	1.03574e-05	3.17396e-05	1.29181e-05		1	1.99188	1	1.29688	0		1	0.37626
gene-VNG_0389C|VNG_0389C|VNG_0389C	VNG_0389C	VNG_RS01520	transcriptionalregulator	VNG_RS01520		17	3	6	0		2.59389e-05	4.43888e-06	1.0023e-05	0		1	2.54685	0		0		1	1.3718
gene-VNG_0390G|VNG_0390G|graD1	VNG_0390G	VNG_RS01525	NDP-sugarsynthase	VNG_RS01525		66	25	62	10		0.000100704	3.69907e-05	0.000103571	1.84545e-05		1	1.44489	1	2.48858	1	-1.00319	1	-0.0405017
gene-VNG_0391C|VNG_0391C|dph6	VNG_0391C	VNG_RS01530	diphthine--ammonialigase	VNG_RS01530		36	4	20	1		5.49295e-05	5.91851e-06	3.34101e-05	1.84545e-06		1	3.21427	1	4.17824	0		1	0.717297
gene-VNG_0393C|VNG_0393C|VNG_0393C	VNG_0393C	VNG_RS01535	DUF373 family protein	VNG_RS01535		89	35	33	30		0.000135798	5.17869e-05	5.51266e-05	5.53634e-05		1	1.3908	1	-0.00618435	1	0.0963447	1	1.30064
gene-VNG_0394C|VNG_0394C|VNG_0394C	VNG_0394C	VNG_RS01540	coiled-coil protein	VNG_RS01540		1750	808	1013	751		0.00267018	0.00119554	0.00169222	0.00138593		1	1.15928	1	0.288061	1	0.213195	1	0.658021
gene-VNG_0396C|VNG_0396C|VNG_0396C	VNG_0396C	VNG_RS01545	DUF371 domain -containing protein	VNG_RS01545		3	0	1	1		4.57746e-06	0	1.6705e-06	1.84545e-06		0		0		0		0
gene-VNG_0398G|VNG_0398G|nthB	VNG_0398G	VNG_RS01550	endonuclease III	VNG_RS01550		9	11	5	3		1.37324e-05	1.62759e-05	8.35252e-06	5.53634e-06		1	-0.245157	0		1	-1.55573	0
gene-VNG_0399H|VNG_0399H|VNG_0399H	VNG_0399H	VNG_RS01555	hypothetical protein	VNG_RS01555		150	77	74	35		0.000228873	0.000113931	0.000123617	6.45907e-05		1	1.00638	1	0.936482	1	-0.818766	1	0.888666
gene-VNG_0401a|VNG_0401a|VNG_0401a	VNG_0401a					2	0	0	0		3.05164e-06	0	0	0		0		0		0		0
gene-VNG_0401G|VNG_0401G|VNG_0401G	VNG_0401G	VNG_RS01560	beta-CASPribonucleaseaCPSF1	VNG_RS01560		774	179	249	112		0.00118098	0.000264853	0.000415955	0.00020669		1	2.15672	1	1.00896	1	-0.357724	1	1.50549
gene-VNG_0402H|VNG_0402H|VNG_0402H	VNG_0402H	VNG_RS14170	hypothetical protein	VNG_RS14170		140	59	118	83		0.000213615	8.7298e-05	0.000197119	0.000153172		1	1.29099	1	0.363916	1	0.811134	1	0.11594
gene-VNG_0403G|VNG_0403G|proS	VNG_0403G	VNG_RS01565	proline--tRNAligase	VNG_RS01565		178	79	192	33		0.000271596	0.000116891	0.000320737	6.08998e-05		1	1.2163	1	2.39688	1	-0.94065	1	-0.239929
gene-VNG_0404H|VNG_0404H|VNG_0404H	VNG_0404H	VNG_RS01570	hypothetical protein	VNG_RS01570		86	51	56	31		0.00013122	7.5461e-05	9.35482e-05	5.72089e-05		1	0.798189	1	0.709471	1	-0.399492	1	0.48821
gene-VNG_0405C|VNG_0405C|VNG_0405C	VNG_0405C	VNG_RS01575	SDR family oxidoreductase	VNG_RS01575		46	24	30	10		7.01876e-05	3.5511e-05	5.01151e-05	1.84545e-05		1	0.982949	1	1.44127	1	-0.944297	1	0.485972
gene-VNG_0406C|VNG_0406C|gldA2	VNG_0406C	VNG_RS01580	NAD(P)-dependentglycerol-1-phosphatedehydrogenase	VNG_RS01580		6	25	10	9		9.15491e-06	3.69907e-05	1.6705e-05	1.6609e-05		1	-2.01454	1	0.00831522	1	-1.15519	1	-0.867665
gene-VNG_0407H|VNG_0407H|VNG_0407H	VNG_0407H	VNG_RS01585	flippase-like domain -containing protein	VNG_RS01585		22	19	19	6		3.3568e-05	2.81129e-05	3.17396e-05	1.10727e-05		1	0.255854	1	1.51928	1	-1.34423	1	0.0808046
gene-VNG_0408H|VNG_0408H|VNG_0408H	VNG_0408H	VNG_RS01590	M48 family metalloprotease	VNG_RS01590		14	7	5	2		2.13615e-05	1.03574e-05	8.35252e-06	3.69089e-06		1	1.04435	0		0		1	1.35473
gene-VNG_0409C|VNG_0409C|VNG_0409C	VNG_0409C	VNG_RS01595	S9 family peptidase	VNG_RS01595		113	52	106	36		0.000172417	7.69406e-05	0.000177073	6.64361e-05		1	1.16409	1	1.41431	1	-0.211778	1	-0.038441
gene-VNG_0410G|VNG_0410G|gth3	VNG_0410G	VNG_RS01600	glycosyl transferase	VNG_RS01600		73	84	139	41		0.000111385	0.000124289	0.0002322	7.56633e-05		1	-0.158143	1	1.6177	1	-0.716028	1	-1.05982
gene-VNG_0412G|VNG_0412G|folCP	VNG_0412G	VNG_RS01605	dihydropteroatesynthase	folP		99	42	59	22		0.000151056	6.21443e-05	9.85597e-05	4.05998e-05		1	1.28139	1	1.27952	1	-0.614149	1	0.616014
gene-VNG_0414G|VNG_0414G|purNH	VNG_0414G	VNG_RS01610	phosphoribosyl glycinamideformyl transferase	VNG_RS01610		148	89	68	32		0.000225821	0.000131687	0.000113594	5.90543e-05		1	0.77807	1	0.943775	1	-1.157	1	0.991291
gene-VNG_0415G|VNG_0415G|purB	VNG_0415G	VNG_RS01615	adenyl osuccinatelyase	purB		44	41	27	17		6.7136e-05	6.06647e-05	4.51036e-05	3.13726e-05		1	0.146229	1	0.523737	1	-0.951352	1	0.573845
gene-VNG_0417H|VNG_0417H|VNG_0417H	VNG_0417H	VNG_RS01620	metallophosphoesterase	VNG_RS01620		53	18	40	7		8.08684e-05	2.66333e-05	6.68201e-05	1.29181e-05		1	1.60235	1	2.37089	1	-1.04383	1	0.275293
gene-VNG_0419C|VNG_0419C|VNG_0419C	VNG_0419C	VNG_RS01625	NYN domain -containing protein	VNG_RS01625		124	42	77	17		0.000189201	6.21443e-05	0.000128629	3.13726e-05		1	1.60623	1	2.03564	1	-0.986117	1	0.55671
gene-VNG_0420H|VNG_0420H|VNG_0420H	VNG_0420H	VNG_RS01630	hypothetical protein	VNG_RS01630		15	7	7	6		2.28873e-05	1.03574e-05	1.16935e-05	1.10727e-05		1	1.14389	0		0		1	0.968836
gene-VNG_0421C|VNG_0421C|VNG_0421C	VNG_0421C	VNG_RS01635	hypothetical protein	VNG_RS01635		21	13	12	1		3.20422e-05	1.92352e-05	2.0046e-05	1.84545e-06		1	0.736227	1	3.44127	1	-3.3817	1	0.676655
gene-VNG_0422G|VNG_0422G|cyc	VNG_0422G	VNG_RS01640	cytochromeP450	VNG_RS01640		154	45	55	19		0.000234976	6.65832e-05	9.18777e-05	3.50635e-05		1	1.81928	1	1.38974	1	-0.925188	1	1.35473
gene-VNG_0424C|VNG_0424C|nac	VNG_0424C	VNG_RS01645	nascentpolypeptide-associatedcomplex protein	VNG_RS01645		122	48	86	21		0.00018615	7.10221e-05	0.000143663	3.87544e-05		1	1.39012	1	1.89026	1	-0.873908	1	0.373773
gene-VNG_0425G|VNG_0425G|trmI	VNG_0425G	VNG_RS01650	methyl transferase domain -containing protein	VNG_RS01650		109	30	75	20		0.000166314	4.43888e-05	0.000125288	3.69089e-05		1	1.90564	1	1.7632	1	-0.266225	1	0.408666
gene-VNG_0426G|VNG_0426G|tfs1	VNG_0426G	VNG_RS01655	transcriptionfactorS	VNG_RS01655		55	12	29	7		8.392e-05	1.77555e-05	4.84446e-05	1.29181e-05		1	2.24075	1	1.90694	1	-0.45887	1	0.792679
gene-VNG_0427G|VNG_0427G|VNG_0427G	VNG_0427G	VNG_RS01660	MFS transporter	VNG_RS01660		20	7	10	1		3.05164e-05	1.03574e-05	1.6705e-05	1.84545e-06		1	1.55892	1	3.17824	0		1	0.8693
[truncated: 3,353 more rows]

## Sheet: S1d. self-self pvalue
M = log2( self-self )		Following: Htself method by: Vêncio RZ, Koide T. DNA Res. 2005;12(3):211-4. doi: 10.1093/dnares/dsi007.
[truncated: 4,207 more rows]

## Sheet: S1e. up- and down-regulated
Antisense RNAs identified in by de Almeida et al. (2019)
[truncated: 290 more rows]

[truncated: 8 more sheets: S1f. Comparison_Microarray, comparison_proteomics, S1g. Comparison_Proteome, S1h. Comparison_Sakrikar, comparison_proteomics2, Sheet5, Sheet6, Sheet7]
